# Supplementary material for: ZO-1 regulates stress granule formation in endothelial cells by interacting with YB-1
Source: Research Square preprint supplement (doi:10.21203/rs.3.rs-1200419/v1), 2022-01-17
Supplement: Supplementary file 1 [file 1183572ee0036c4a3b66c11c.xlsx]

## Sheet: proteinGroups_RC FDR
Protein IDs	Majority protein IDs	Protein names	Gene names	Peptides	Unique peptides	Score	N: MS/MS Count	LFQ normalized intensity IgG1	LFQ normalized intensity IgG2	LFQ normalized intensity IgG3	LFQ normalized intensity IgG4	LFQ normalized intensity IgG5	LFQ normalized intensity CTL1	LFQ normalized intensity CTL2	LFQ normalized intensity CTL3	LFQ normalized intensity CTL4	LFQ normalized intensity CTL5	LFQ normalized intensity VEGF1	LFQ normalized intensity VEGF2	LFQ normalized intensity VEGF3	LFQ normalized intensity VEGF4	LFQ normalized intensity VEGF5	test	LFQ normalizedintensity IgG1	LFQ normalizedintensity IgG2	LFQ normalizedintensity IgG3	LFQ normalizedintensity IgG4	LFQ normalizedintensity IgG5	LFQ normalizedintensity CTL1 1.03425	LFQ normalizedintensity CTL2 1.130227	LFQ normalizedintensity CTL3 1.216614	LFQ normalizedintensity CTL4 0.509312	LFQ normalizedintensity CTL5 0.537157	LFQ normalizedintensity VEGF1 0.508315	LFQ normalizedintensity VEGF2 0.509213	LFQ normalizedintensity VEGF3 0.53888	LFQ normalizedintensity VEGF4 0.617016	LFQ normalizedintensity VEGF5 0.636088	test	Ratio CTL/IgG1	Ratio CTL/IgG2	Ratio CTL/IgG3	Ratio CTL/IgG4	Ratio CTL/IgG5	Ratio VEGF/IgG1	Ratio VEGF/IgG2	Ratio VEGF/IgG3	Ratio VEGF/IgG4	Ratio VEGF/IgG5
F1N1T3;Q9Y2D5	F1N1T3	Uncharacterized protein	AKAP2	54	54	323.31	1025			299490	3082400	469600	7.65579e+08	8.8284e+08	6.12314e+08	8.10152e+08	7.51437e+08	1.71945e+09	2.61188e+09	2.24299e+09	1.73367e+09	1.47786e+09		19.3824	18.6579	18.1921	21.5556	18.8411	29.512	29.7176	29.1897	29.5936	29.4851	30.6793	31.2824	31.0628	30.6912	30.4609				2044.52	262.831	1600.16			7489.35	562.44	3147.06
Q3ZBX5	Q3ZBX5	Small inducible cytokine subfamily ...	SCYE1 AIMP1	8	6	12.381	68						4.37873e+06	953967	4.177e+06	5.06232e+06	5.34853e+06	8.36706e+06	1.74202e+07	1.63892e+07	1.67483e+07	1.68546e+07		19.1782	18.7152	18.5935	18.7403	18.3638	22.0621	19.8636	21.994	22.2714	22.3507	22.9963	24.0543	23.9662	23.9975	24.0066
Q08E32;Q9H444	Q08E32;Q9H444	Charged multivesicular body protein 4b	CHMP4B	6	6	42.96	104				1491400		1.01533e+07	1.58694e+07	2.72502e+07	1.47801e+07	1.90391e+07	1.13835e+07	8.79476e+07	1.26071e+08	8.27174e+07	6.68917e+07		18.3858	17.7479	18.5164	20.5082	18.2909	23.2754	23.9197	24.6998	23.8172	24.1825	23.4404	26.3901	26.9097	26.3017	25.9953					9.91024					55.4629
P02253;P16403	P02253;P16403	Histone H1.2	HIST1H1C	12	3	55.805	158	24261000	14487000	8104400	19117000	16618000	3.84946e+07	4.02583e+07	3.06811e+07	3.79021e+07	4.76602e+07	4.98844e+07	7.86509e+07	3.70695e+07	6.60274e+07	6.40556e+07		24.5321	23.7883	22.9503	24.1884	23.9862	25.1982	25.2628	24.8708	25.1758	25.5063	25.5721	26.229	25.1437	25.9766	25.9328		1.58669	2.77892	3.78573	1.98264	2.86798	2.05616	5.42906	4.57399	3.45386	3.85459
G8JKY0;Q5E958;P62241	G8JKY0;Q5E958;P62241	40S ribosomal protein S8	RPS8	7	7	55.03	123	28542000	16423000	15776000	20511000	18895000	2.69432e+07	3.08053e+07	2.77253e+07	2.30664e+07	2.17646e+07	3.97411e+07	4.80801e+07	4.82891e+07	5.50536e+07	4.91599e+07		24.7666	23.9692	23.9112	24.2899	24.1715	24.6834	24.8767	24.7247	24.4593	24.3755	25.2441	25.5189	25.5252	25.7143	25.551		0.943984	1.87574	1.75744	1.12459	1.15187	1.39237	2.92761	3.06092	2.6841	2.60174
E1B7G6;Q9ULJ7	E1B7G6;Q9ULJ7	Ankyrin repeat domain-containing protein 50	ANKRD50	4	4	6.3118	20			1516700			1.00111e+06	2.11444e+06	4.46288e+06	2.54009e+06	2.32558e+06	8.154e+06	6.63318e+06	9.57022e+06	1.02715e+07	9.48186e+06		19.11	17.867	20.5325	18.6777	17.2307	19.9332	21.0118	22.0895	21.2764	21.1492	22.9591	22.6613	23.1901	23.2921	23.1767				2.94249					6.3099
F1MDC1;Q9P2E9;Q8N4C6	F1MDC1	Uncharacterized protein		30	30	123.88	264	84932000	8143600	3851400	29097000	33795000	6.36162e+07	4.96617e+07	7.54841e+07	6.60833e+07	5.30422e+07	8.41447e+07	1.29141e+08	1.42941e+08	1.04304e+08	1.21449e+08		26.3398	22.9572	21.877	24.7944	25.0103	25.9229	25.5656	26.1697	25.9778	25.6606	26.3264	26.9444	27.0908	26.6362	26.8558		0.749025	6.09825	19.5991	2.27114	1.56953	0.99073	15.8579	37.114	3.58468	3.59368
F1MME2	F1MME2	Uncharacterized protein	DENND1A	2	2	4.0016	6						586270						1.34677e+06	1.35292e+06	1.23203e+06	1.1602e+06		19.0288	17.9812	18.4707	17.4942	17.108	19.1612	17.8151	17.6472	18.6616	19.5511	19.6702	20.3611	20.3676	20.2326	20.1459
Q3ZC10;P62314;E1BCC9;G3N0J6	Q3ZC10;P62314;E1BCC9;G3N0J6	Small nuclear ribonucleoprotein Sm D1	SNRPD1	4	4	20.859	76	5241000	3178300	6673800	6303800	3324900	6.8496e+06	9.08844e+06	6.46951e+06	1.11947e+07	8.39531e+06	1.20978e+07	2.9524e+07	2.35841e+07	1.6254e+07	1.34761e+07		22.3214	21.5998	22.6701	22.5878	21.6649	22.7076	23.1156	22.6252	23.4163	23.0012	23.5282	24.8154	24.4913	23.9543	23.6839		1.30693	2.85953	0.96939	1.77587	2.52498	2.3083	9.28925	3.53383	2.57845	4.05309
Q3SZ32;Q15370;E1BJ20;G3MXN8;E1BF97	Q3SZ32;Q15370;E1BJ20;G3MXN8	Transcription elongation factor B polypeptide 2	TCEB2	6	6	9.5733	66	10483000			4284300	5774900	6.6249e+06	1.35999e+07	1.04051e+07	1.52472e+07	1.37382e+07	1.82981e+07	5.41228e+07	5.30563e+07	2.29864e+07	2.92853e+07		23.3215	18.6107	18.8245	22.0306	22.4614	22.6595	23.6971	23.3108	23.862	23.7117	24.1252	25.6897	25.661	24.4543	24.8037		0.631966			3.55886	2.37896	1.7455			5.36527	5.07113
A7YW98	A7YW98	Arginine--tRNA ligase, cytoplasmic	RARS	2	2	5.4633	12					262870								1.21044e+06	953135	960779		19.3074	17.7077	17.1423	19.1003	18.004	19.5978	17.8006	18.0503	18.5224	18.5784	19.2629	20.0684	20.2071	19.8623	19.8738											3.65496
F6RBQ9;P98179	F6RBQ9	Uncharacterized protein	RBM3	9	9	80.193	108	50603000	35566000	33595000	30944000	43652000	3.12719e+07	4.27613e+07	4.01796e+07	5.6808e+07	4.24568e+07	9.36663e+07	1.52775e+08	9.0677e+07	6.44164e+07	5.99713e+07		25.5927	25.084	25.0017	24.8832	25.3795	24.8984	25.3498	25.26	25.7596	25.3395	26.481	27.1868	26.4342	25.9409	25.8378		0.617986	1.20231	1.196	1.83583	0.972621	1.851	4.29554	2.69912	2.08171	1.37385
G3MY19;Q3ZBU0;Q96HC4	G3MY19	Uncharacterized protein	PDLIM5	3	3	5.1597	34	3483100		1783100	3579900	2630000	2.32159e+06	3.88205e+06	4.57286e+06	5.8312e+06	6.31454e+06	8.59349e+06	9.05398e+06	8.61212e+06	1.15235e+07	7.4845e+06		21.7319	19.4841	20.766	21.7715	21.3266	21.1467	21.8884	22.1247	22.4754	22.5902	23.0348	23.1101	23.0379	23.4581	22.8355		0.666529		2.56455	1.62887	2.40097	2.4672		4.82986	3.21895	2.84582
F1ML72;P49207	F1ML72;P49207	60S ribosomal protein L34	RPL34	2	2	6.844	28	3498700				4702900	3.33304e+06			3.19019e+06		5.31383e+06	5.60513e+06	6.03233e+06	8.06462e+06	7.91148e+06		21.7384	18.3159	17.6812	18.9571	22.1651	21.6684	18.5546	18.3993	21.6052	18.36	22.3413	22.4183	22.5243	22.9432	22.9155		0.952652					1.5188				1.68226
P22439	P22439	Pyruvate dehydrogenase protein X co...	PDHX PDX1	2	2	3.0118	27	1476100				523340	849843	1.05855e+06	3.0441e+06	910895	1.1919e+06	1.67713e+06	6.53912e+06	6.18765e+06	3.9516e+06	3.88248e+06		20.4934	17.4257	17.5808	18.6679	18.9974	19.6968	20.0137	21.5376	19.7969	20.1848	20.6776	22.6407	22.561	21.914	21.8885		0.575735				2.2775	1.13619				7.41866
A0A140T861;Q28009;P35637	A0A140T861;Q28009;P35637	RNA-binding protein FUS	FUS	11	10	194.35	347	292640000	408750000	315790000	369630000	226730000	1.85265e+08	3.13972e+08	3.92014e+08	5.15421e+08	5.82827e+08	6.15248e+08	1.28879e+09	9.14452e+08	8.44905e+08	6.81399e+08		28.1246	28.6066	28.2344	28.4615	27.7564	27.465	28.2261	28.5463	28.9412	29.1185	29.1966	30.2634	29.7683	29.6542	29.3439		0.633081	0.768128	1.24138	1.39442	2.57058	2.10241	3.15301	2.89576	2.28581	3.00533
Q3T003;Q02543;F1MHJ6	Q3T003;Q02543;F1MHJ6	60S ribosomal protein L18a	RPL18A	3	3	3.7946	10	7258100					5.4891e+06	1.17481e+06				4.68273e+06	4.94077e+06	7.46864e+06	6.15997e+06	7.66623e+06		22.7912	18.3578	17.2658	17.8992	17.406	22.3881	20.164	17.3702	19.4335	19.2561	22.1589	22.2363	22.8324	22.5545	22.8701		0.756272					0.645172
Q5E995;P62753;F1MKZ5;E1BG13;E1B8K9	Q5E995;P62753;F1MKZ5;E1BG13;E1B8K9	40S ribosomal protein S6	RPS6	6	6	16.734	88	7928700	5510400	4492600	9089300	6889400	9.24835e+06	9.72902e+06	1.26523e+07	7.87297e+06	1.35636e+07	1.11246e+07	2.25132e+07	2.84535e+07	2.89279e+07	1.81862e+07		22.9187	22.3937	22.0991	23.1157	22.7159	23.1408	23.2139	23.5929	22.9085	23.6932	23.4072	24.4243	24.7621	24.786	24.1163		1.16644	1.76557	2.81626	0.86618	1.96877	1.40308	4.08558	6.33341	3.18263	2.63973
F1MZV2;Q9NZZ3	F1MZV2;Q9NZZ3	Charged multivesicular body protein 5	CHMP5	2	2	5.188	11				1116000			2.07958e+06	4.45014e+06	3.46369e+06		3.60446e+06	2.5453e+07	1.52682e+07	8.60091e+06	9.18316e+06		19.1192	17.5584	18.5268	20.0899	18.3007	18.6997	20.9879	22.0854	21.7239	19.266	21.7814	24.6013	23.864	23.0361	23.1306					3.10367					7.7069
P10096	P10096	Glyceraldehyde-3-phosphate dehydrog...	GAPDH GAPD	5	2	84.256	60	14413000	10756000	7931400	11440000	7927200	1.15253e+07	1.51837e+07	1.79153e+07	1.38265e+07	1.0999e+07	1.57705e+07	1.75703e+07	2.22925e+07	2.24743e+07	2.25173e+07		23.7809	23.3586	22.9191	23.4476	22.9184	23.4583	23.856	24.0947	23.7209	23.3909	23.9107	24.0666	24.4101	24.4218	24.4245		0.799644	1.41165	2.25878	1.20861	1.3875	1.09419	1.63353	2.81067	1.96454	2.84051
G5E604;G5E5H2;G5E5V1	G5E604;G5E5H2;G5E5V1	Uncharacterized protein		2	2	2.4814	6				690280	768490		776817			744493	1.04465e+06	1.04159e+06	1.71077e+06	5.51152e+06	7.59172e+06		18.119	18.7046	17.3955	19.3968	19.5517	17.6681	19.5672	18.4088	19.4432	19.5059	19.9946	19.9904	20.7062	22.394	22.856						0.968774				7.98447	9.87874
Q2TBQ5;P62424	Q2TBQ5;P62424	60S ribosomal protein L7a	RPL7A	7	7	20.424	55	17137000	10036000	5468000	6361400	7101300	1.32444e+07	1.56915e+07	1.02621e+07	1.06398e+07	8.52525e+06	2.201e+07	1.59434e+07	1.24087e+07	1.99719e+07	2.49557e+07		24.0306	23.2587	22.3826	22.6009	22.7597	23.6589	23.9035	23.2908	23.343	23.0233	24.3917	23.9265	23.5648	24.2515	24.5729		0.772853	1.56352	1.87675	1.67256	1.20052	1.28435	1.58863	2.26933	3.13955	3.51424
A4FUC2;Q9BUJ2	A4FUC2;Q9BUJ2	Heterogeneous nuclear ribonucleoprotein U-like protein 1	HNRNPUL1	6	6	5.6305	7	3737400				3778300	4.1432e+06	5.72575e+06	4.0445e+06	6.36623e+06		1.29668e+07	1.17497e+07	9.05285e+06	8.00303e+06	7.2045e+06		21.8336	18.4283	19.55	19.8187	21.8493	21.9823	22.449	21.9475	22.602	20.2094	23.6283	23.4861	23.1099	22.9321	22.7805		1.10858					3.46946				1.90681
F1MLW0;Q27976	F1MLW0	Non-muscle caldesmon	CALD1	5	5	14.236	32	2294100	2872200	2084400	3466300	2807500	1.89335e+06	1.58251e+06	1.07676e+06	3.57247e+06	4.22539e+06	7.13298e+06	2.5673e+06	5.29394e+06	7.40386e+06	9.43894e+06		21.1295	21.4537	20.9912	21.725	21.4209	20.8525	20.5938	20.0383	21.7685	22.0107	22.7661	21.2918	22.3359	22.8198	23.1702		0.825314	0.550976	0.51658	1.03063	1.50504	3.10927	0.893844	2.53979	2.13595	3.36205
F1MYN2	F1MYN2	Uncharacterized protein	CGN	6	6	6.417	21								2.01099e+06		3.44759e+06		7.71407e+06	9.98311e+06	8.7761e+06	9.06667e+06		18.2828	19.0197	17.6973	17.616	17.5161	18.6902	18.564	20.9395	18.3772	21.7172	19.6797	22.8791	23.2511	23.0651	23.1121
Q3T149;G3X7S2;E1BEL7	Q3T149;G3X7S2;E1BEL7	Heat shock protein beta-1	HSPB1 HSP27	3	2	40.712	66	2820200		3605100	3457000	3742400	2.17578e+06	3.59759e+06	1.99718e+06	8.79638e+06	5.19904e+06	5.376e+06	8.12019e+06	1.0537e+07	9.75582e+06	1.08112e+07		21.4274	17.8506	21.7816	21.7211	21.8355	21.0531	21.7786	20.9295	23.0685	22.3098	22.3581	22.9531	23.329	23.2178	23.366		0.771499		0.553988	2.54451	1.38923	1.90625		2.92282	2.82205	2.88885
Q5T749	Q5T749	Keratinocyte proline-rich protein	KPRP	4	4	4.9851	31	3410000	4764000	6464900	2104900	2559800	1.55021e+06	6.85163e+06	1.2063e+07	2.45194e+06		8.47899e+06	2.14252e+07	1.94552e+07	1.9429e+07	1.21529e+07		21.7013	22.1837	22.6242	21.0053	21.2876	20.564	22.708	23.5241	21.2255	18.1824	23.0155	24.3528	24.2136	24.2117	23.5348		0.454606	1.43821	1.86592	1.16487		2.48651	4.49732	3.00935	9.23036	4.74759
Q3T0I4;Q86V81	Q3T0I4;Q86V81	THO complex subunit 4	ALYREF	9	9	117.97	124	27352000	55023000	24311000	56092000	67596000	4.78859e+07	4.30851e+07	4.94742e+07	8.52994e+07	8.86593e+07	1.01189e+08	8.31441e+07	8.05059e+07	1.14371e+08	8.43877e+07		24.7051	25.7135	24.5351	25.7413	26.0104	25.5131	25.3607	25.5602	26.346	26.4018	26.5925	26.3091	26.2626	26.7691	26.3305		1.75073	0.783039	2.03505	1.5207	1.31161	3.69952	1.51108	3.3115	2.039	1.24841
F1MC31;Q13435	F1MC31;Q13435	Splicing factor 3B subunit 2	SF3B2	1	1	2.2641	8					837710		1.08898e+06			1.09087e+06		2.37543e+06		2.05926e+06	1.89848e+06		18.0475	17.5462	18.1418	17.3784	19.6761	19.3353	20.0546	18.5034	19.4402	20.0571	19.4454	21.1798	20.2813	20.9737	20.8564						1.30221					2.26627
F1MYG5;P02545;P48678	F1MYG5;P02545;P48678	Prelamin-A/C;Lamin-A/C	LMNA;Lmna	39	34	191.37	679	175930000	69253000	51716000	96697000	107770000	1.09229e+08	9.34679e+07	9.24615e+07	1.7663e+08	2.0037e+08	1.55392e+08	1.71643e+08	1.92789e+08	3.14092e+08	2.87539e+08		27.3904	26.0454	25.6241	26.527	26.6834	26.7028	26.478	26.4624	27.3962	27.5781	27.2113	27.3548	27.5224	28.2266	28.0992		0.620866	1.34966	1.78787	1.82664	1.85923	0.883259	2.4785	3.72784	3.24821	2.66808
P67808;F1MZ92;P67809;A5D7M4;Q9Y2T7	P67808;F1MZ92;P67809	Nuclease-sensitive element-binding protein 1	YBX1	10	7	50.547	94	27710000		14928000	8507300	5881900	3.23781e+07	6.17212e+06	3.57402e+06	2.09361e+07	1.47709e+07	1.3039e+08	6.70742e+07	2.9745e+07	2.12863e+07	2.06434e+07		24.7239	19.7225	23.8315	23.0203	22.4879	24.9485	22.5573	21.7691	24.3195	23.8163	26.9583	25.9993	24.8261	24.3434	24.2992		1.16846		0.239417	2.46096	2.51125	4.70551		1.99257	2.50212	3.50964
Q58CS6;Q8IY31	Q58CS6;Q8IY31	Intraflagellar transport protein 20 homolog	IFT20	7	7	37.726	79				902820	882520	2.5403e+06	5.44315e+06	3.42927e+06	1.00135e+07	9.62567e+06	7.96435e+06	2.07124e+07	3.47925e+07	1.43821e+07	1.45936e+07		18.8101	18.712	17.5496	19.7841	19.7513	21.2766	22.376	21.7095	23.2554	23.1985	22.9251	24.304	25.0523	23.7778	23.7988					11.0914	10.907				15.9302	16.5363
Q0P5D2;F2Z4E9;Q16630	Q0P5D2;F2Z4E9;Q16630	Cleavage and polyadenylation specificity factor subunit 6	CPSF6	9	9	19.294	106	8302900	1929900				3.91888e+06	1.77239e+07	2.79924e+07	2.19198e+07	1.29984e+07	2.88522e+07	3.04352e+07	3.70138e+07	3.61206e+07	3.62324e+07		22.9852	20.8801	18.1362	18.6251	18.2477	21.902	24.0792	24.7385	24.3857	23.6318	24.7822	24.8592	25.1416	25.1063	25.1108		0.471989	9.18383				3.47495	15.7704
A7Z051;Q5H9R7	A7Z051	SAPS3 protein	SAPS3 PPP6R3	8	8	25.841	58						7.02316e+06	1.07456e+07	1.34422e+07	1.00555e+07	1.06779e+07	1.336e+07	1.50438e+07	1.04118e+07	1.67386e+07	1.95476e+07		18.3716	19.2851	18.1772	18.5817	18.204	22.7437	23.3572	23.6803	23.2615	23.3481	23.6714	23.8427	23.3117	23.9967	24.2205
A6QL97;Q96JJ7	A6QL97	TMX3 protein	TMX3	9	9	42.278	68				2142900		9.11965e+06	1.91767e+07	1.65755e+07	1.22836e+07	1.93593e+07	1.03686e+07	3.7177e+07	2.48831e+07	2.91111e+07	2.85228e+07		18.4325	19.1757	15.764	21.0311	17.1312	23.1205	24.1928	23.9825	23.5502	24.2065	23.3057	25.1479	24.5687	24.7951	24.7656					5.73225					13.5849
F1N1V3;Q92621	F1N1V3	Uncharacterized protein	NUP205	3	3	3.7462	11						1.28876e+06	3.4371e+06	2.2224e+06	1.43056e+06	2.33768e+06	1.67463e+06	3.23225e+06	4.27721e+06	3.61546e+06	3.63031e+06		16.6764	17.9464	18.2711	18.7058	18.3291	20.2976	21.7128	21.0837	20.4481	21.1566	20.6754	21.6241	22.0282	21.7857	21.7917
F1N0H5;Q5T200	F1N0H5	Uncharacterized protein	ZC3H13	16	16	73.806	108				1998100	895070	1.28644e+07	2.93516e+07	1.91195e+07	3.04803e+07	2.07425e+07	9.15535e+06	6.91146e+07	7.36695e+07	6.52495e+07	5.76021e+07		18.026	18.7752	18.6651	20.9302	19.7716	23.6169	24.8069	24.1885	24.8614	24.3061	23.1262	26.0425	26.1346	25.9595	25.7796					15.2547	23.1742				32.6558	64.3548
F1MM82;Q9ULF5	F1MM82	Uncharacterized protein	SLC39A10	11	11	28.452	89					4927900	1.14614e+07	2.76679e+07	3.74696e+07	2.32667e+07	2.34494e+07	1.32237e+07	4.12892e+07	4.81202e+07	8.13803e+07	7.98317e+07		19.0471	18.8018	18.5854	18.5665	22.2325	23.4503	24.7217	25.1592	24.4718	24.483	23.6566	25.2993	25.5201	26.2782	26.2505						4.75849					16.1999
A6QL93	A6QL93	TACC3 protein	TACC3	10	10	17.84	75						5.95195e+06	1.93412e+07	2.09952e+07	1.83991e+07	1.95548e+07	8.69382e+06	3.85674e+07	4.02557e+07	5.0997e+07	3.09627e+07		19.3326	17.9394	19.5586	18.6747	18.2977	22.5049	24.2052	24.3236	24.1331	24.221	23.0516	25.2009	25.2627	25.6039	24.884
F1MN80;Q15007;E1BH99;Q7SXL7	F1MN80;Q15007;E1BH99	Pre-mRNA-splicing regulator WTAP	WTAP	30	30	323.31	559		690900		5492400	3860500	1.18782e+08	3.39843e+08	3.10181e+08	2.60548e+08	2.76288e+08	1.14067e+08	7.66556e+08	6.14942e+08	5.64215e+08	6.06661e+08		19.7355	19.3981	18.5567	22.389	21.8804	26.8237	28.3403	28.2085	27.957	28.0416	26.7653	29.5138	29.1959	29.0717	29.1763			491.885		47.4378	71.5679		1109.5		102.727	157.146
G5E5C0	G5E5C0	Uncharacterized protein	INF2	15	14	24.058	112				1819400		1.81204e+07	3.83763e+07	2.13634e+07	2.28072e+07	2.55251e+07	1.5273e+07	3.50561e+07	3.89456e+07	5.37781e+07	6.47379e+07		19.553	15.89	18.0064	20.795	18.1887	24.1111	25.1937	24.3486	24.443	24.6054	23.8645	25.0632	25.215	25.6805	25.9481					12.5356					29.5582
Q0V8H6;Q9HCE1;Q1LXK4;Q1LXK5	Q0V8H6	Putative helicase MOV-10	MOV10	9	9	27.869	53					5924500	2.07996e+07	1.53049e+07	1.42773e+07	6.20032e+06	6.97803e+06	1.20262e+07	1.77513e+07	1.8282e+07	2.20399e+07	1.34664e+07		17.7602	19.9585	18.8808	19.1381	22.4983	24.3101	23.8675	23.7672	22.5639	22.7344	23.5197	24.0814	24.1239	24.3936	23.6829						1.17783					2.273
F1MZ69;E1BN82;M5FMW2;Q9UPT6	F1MZ69	C-Jun-amino-terminal kinase-interacting protein 3	SPAG9	19	10	92.488	167						1.36099e+07	3.58707e+07	4.23725e+07	2.04217e+07	1.92942e+07	1.59557e+07	3.4954e+07	4.91111e+07	5.30245e+07	4.21797e+07		18.2552	18.1575	17.4555	19.6021	19.2324	23.6981	25.0963	25.3366	24.2836	24.2017	23.9276	25.059	25.5495	25.6602	25.33
Q3SZJ2;G3MX89;P58801	Q3SZJ2;G3MX89	Receptor-interacting serine/threoni...	RIPK2	12	9	33.06	101						1.11927e+06	1.19817e+07	1.09032e+07	1.47187e+07	1.20667e+07		5.11064e+07	4.05749e+07	8.83996e+07	5.38652e+07		18.4166	18.8207	18.0667	18.0382	17.6562	20.0941	23.5143	23.3783	23.8111	23.5245	19.6283	25.607	25.2741	26.3975	25.6828
E1BEB4;P98095	E1BEB4	Uncharacterized protein	FBLN2	11	11	33.772	113		2527200		935600	2177900	7.29717e+06	2.99488e+07	2.50071e+07	3.6563e+07	3.96644e+07	3.44334e+07	6.94877e+07	6.6538e+07	1.88245e+07	1.87946e+07		19.1457	21.2691	16.9897	19.8355	21.0545	22.7989	24.836	24.5758	25.1239	25.2413	25.0373	26.0503	25.9877	24.1661	24.1638			11.8506		39.0798	18.2122		27.4959		20.1202	8.62967
Q2KJE0;Q86VP1	Q2KJE0	Tax1-binding protein 1 homolog	TAX1BP1	19	19	51.15	159						7.18386e+06	2.4281e+07	1.35409e+07	1.47915e+07	1.8879e+07		1.04019e+08	1.05202e+08	6.16386e+07	5.75345e+07		18.7739	18.4334	18.5235	18.9042	18.529	22.7763	24.5333	23.6908	23.8183	24.1703	19.9526	26.6323	26.6486	25.8773	25.7779
E1BKT0;Q86V48	E1BKT0	Uncharacterized protein	LUZP1	25	25	65.933	234		745880		2651200	1814500	1.13638e+07	3.47346e+07	3.1826e+07	3.12579e+07	3.03635e+07	3.05244e+06	9.55613e+07	8.07675e+07	7.40758e+07	7.11081e+07		19.3667	19.5086	17.7501	21.3382	20.7911	23.4379	25.0499	24.9237	24.8977	24.8558	21.5415	26.5099	26.2673	26.1425	26.0835			46.5686		11.7901	16.7338		128.119		27.9405	39.1888
Q3ZC50;Q96A33;F1MG07	Q3ZC50;Q96A33;F1MG07	Coiled-coil domain-containing protein 47	CCDC47	11	11	29.118	88						5.12033e+06	4.06644e+07	3.17184e+07	1.93746e+07	2.19917e+07	9.41463e+06	5.09473e+07	2.84516e+07	3.85695e+07	2.36351e+07		19.99	18.0051	16.5337	17.6723	17.2875	22.2878	25.2773	24.9188	24.2077	24.3905	23.1665	25.6025	24.762	25.201	24.4944
Q1RMV0;P50542	Q1RMV0;P50542	Peroxisomal targeting signal 1 receptor	PEX5	7	7	24.626	58						975006	5.05447e+06	5.35371e+06	6.11727e+06	4.79841e+06		8.60348e+06	1.18926e+07	5.1822e+06	8.56076e+06		19.2103	18.1831	19.0174	18.9404	18.5655	19.8951	22.2691	22.3521	22.5445	22.1941	19.6768	23.0365	23.5036	22.3051	23.0293
F1MX77;Q69YN4	F1MX77;Q69YN4	Protein virilizer homolog	KIAA1429	20	20	78.316	151						2.48383e+07	3.12406e+07	3.53645e+07	2.47491e+07	2.00128e+07	2.19018e+07	3.07632e+07	2.04183e+07	4.02096e+07	3.80781e+07		18.4845	18.2448	17.7321	19.2007	18.8278	24.5661	24.8969	25.0758	24.5609	24.2544	24.3845	24.8747	24.2834	25.261	25.1825
F1MHP6	F1MHP6	Adenylosuccinate lyase	ADSL	44	2	323.31	1180	2608200	14465000	14716000	165300000	229190000	1.17341e+09	2.99807e+09	2.84305e+09	1.62967e+09	1.70956e+09	1.24328e+09	2.64605e+09	2.45064e+09	2.55747e+09	2.19875e+09		21.3146	23.7861	23.8109	27.3005	27.772	30.1281	31.4814	31.4048	30.6019	30.671	30.2115	31.3012	31.1905	31.2521	31.034		449.893	207.264	193.195	9.85886	7.45912	476.683	182.928	166.529	15.4717	9.59358
F1MBN2;Q9UDY2;F1MTP9;F1MEC0;O95049	F1MBN2;Q9UDY2;F1MTP9	Tight junction protein ZO-2	TJP2	54	53	323.31	1037		6099300		16247000	11803000	1.6729e+08	5.50031e+08	7.00847e+08	4.31032e+08	4.27901e+08	8.4668e+07	8.20954e+08	8.0029e+08	8.64969e+08	7.37586e+08		18.4067	22.5402	18.4453	23.9537	23.4927	27.3178	29.0349	29.3845	28.6832	28.6727	26.3353	29.6127	29.5759	29.6881	29.4582			90.1793		26.53	36.2536		134.598		53.2387	62.4914
E1BPA1;G3N3M2;G3MYM2;O60343	E1BPA1;G3N3M2;G3MYM2	Uncharacterized protein	TBC1D4	19	19	45.252	106						1.09693e+07	1.94563e+07	2.19552e+07	1.10906e+07	8.46419e+06		2.76682e+07	2.86687e+07	4.82597e+07	5.02116e+07		19.6119	19.0931	17.8454	17.9319	17.5491	23.387	24.2137	24.3881	23.4028	23.0129	18.5238	24.7217	24.773	25.5243	25.5815
F1N2D3	F1N2D3	Uncharacterized protein	TJP1	94	47	323.31	2356	3409500	9769800	1005000	82754000	72043000	2071550000	1737172500	1935125000	1.80076e+09	1.71989e+09	2071550000	1.73717e+09	1.93513e+09	1800762500	1.71989e+09		21.7011	23.2199	19.9388	26.3023	26.1024	30.9481	30.6941	30.8498	30.746	30.6797	30.9481	30.6941	30.8498	30.746	30.6797		607.582	177.81	1925.5	21.7604	23.8731	607.582	177.81	1925.5	21.7604	23.8731
E1BM42;Q9P260	E1BM42;Q9P260	LisH domain and HEAT repeat-containing protein KIAA1468	KIAA1468	7	7	8.4364	19							2.46225e+06	3.05783e+06	4.58933e+06	3.71679e+06			5.77142e+06	7.08652e+06	5.78426e+06		18.5167	19.0015	18.8963	18.2459	17.8655	18.9711	21.2315	21.5441	22.1299	21.8256	18.7839	19.1066	22.4605	22.7566	22.4637
G5E5V6;Q0VF96	G5E5V6	Uncharacterized protein	CGNL1	10	10	27.706	40						6.88702e+06	768527	2.53786e+06	6.30262e+06	7.24239e+06			4.22747e+06	1.15814e+07	1.06531e+07		18.1721	18.8372	17.9814	16.8072	16.4155	22.7154	19.5517	21.2752	22.5875	22.788	19.586	18.8356	22.0114	23.4653	23.3448
E1BIE7;Q96HS1	E1BIE7	Uncharacterized protein	PGAM5	5	5	6.3735	12						3.2702e+06	1.22126e+07	5.46303e+06	6.63699e+06	8.61126e+06		8.06991e+06	7.21552e+06	1.58213e+07	8.25923e+06		19.1163	18.2503	18.2511	19.6461	19.2768	21.6409	23.5419	22.3813	22.6621	23.0378	18.9046	22.9441	22.7827	23.9154	22.9776
Q3ZCA2;O43809	Q3ZCA2;O43809	Cleavage and polyadenylation specificity factor subunit 5	NUDT21	3	3	6.5883	23				3369300	2827900	5.2848e+06	1.29832e+07	1.03805e+07	1.03575e+07	9.45924e+06		1.64075e+07	1.63079e+07	1.05336e+07	9.49821e+06		19.5173	17.9033	16.9339	21.684	21.4313	22.3334	23.6301	23.3074	23.3042	23.1733	19.1798	23.9679	23.9591	23.3285	23.1792					3.07408	3.34497				3.12634	3.35875
F1MMW4;Q9ULX6	F1MMW4	Uncharacterized protein	AKAP8L	25	25	111.97	195				6012500	4340900	1.03273e+08	1.35344e+08	4.51491e+07	1.63619e+08	1.28817e+08	7.51247e+07	4.65896e+07	8.81514e+07	1.31471e+08	1.5365e+08		19.0145	17.1434	17.9101	22.5195	22.0496	26.6219	27.0121	25.4282	27.2858	26.9407	26.1628	25.4735	26.3935	26.9702	27.1951					27.2131	29.6752				21.8663	35.3959
P18246;P17302;O57474	P18246;P17302	Gap junction alpha-1 protein	GJA1	6	6	19.156	24					1588000	4.62045e+06	2.88827e+06	4.09037e+06	2.8028e+06	1.79973e+06	7.98225e+06			3.48483e+06	3.68817e+06		18.5739	16.2076	18.6114	17.5173	20.5988	22.1396	21.4618	21.9638	21.4184	20.7794	22.9284	19.7598	19.924	21.7327	21.8145						1.13333					2.32252
Q3T087;P62913	Q3T087;P62913	60S ribosomal protein L11	RPL11	2	2	3.3364	12				738020	1542500	4.02669e+06	5.31486e+06	6.44272e+06	3.66377e+06	2.18632e+06		7.01534e+06	4.99982e+06	5.19305e+06	4.75893e+06		18.6591	18.4538	17.2925	19.4933	20.5568	21.9412	22.3416	22.6192	21.8049	21.0601	17.8527	22.7421	22.2534	22.3082	22.1822					4.96432	1.41739				7.03647	3.08521
G5E512;A2VE02	G5E512;A2VE02	Uncharacterized protein	KIAA1462	5	5	8.351	17						2.36365e+06	1.89882e+06	1.40086e+06	4.41596e+06	3.65107e+06				5.87796e+06	3.6245e+06		20.0315	17.8911	17.768	18.419	18.04	21.1726	20.8567	20.4179	22.0743	21.7999	20.3689	19.8423	18.6455	22.4869	21.7894
Q3ZBT6;P62995	Q3ZBT6;P62995	Transformer-2 protein homolog beta	TRA2B	6	5	10.866	61	3186400			5294500		1.1298e+07	1.17304e+07	1.36009e+07	2.11206e+07	2.3872e+07	7.69542e+06	1.73006e+06	2.54472e+07	8.54434e+06	9.92756e+06		21.6035	19.0773	16.0746	22.3361	18.7648	23.4296	23.4837	23.6972	24.3322	24.5088	22.8756	20.7224	24.601	23.0265	23.243		3.54571			3.98917		2.41508			1.61381
F1N5T6	F1N5T6	Phosphodiesterase	PDE4C	1	1	5.8283	8							2.71476e+06	2.21253e+06	2.4431e+06	2.45794e+06				2.27611e+06			18.0279	17.715	18.7396	18.8075	18.4316	19.3852	21.3724	21.0773	21.2203	21.229	19.4271	19.5377	18.9011	21.1181	18.1754
G1K134;Q58DW4;Q17QN3;P63164;P63162;P14678	G1K134;Q58DW4;Q17QN3;P63164;P63162;P14678	Small nuclear ribonucleoprotein-associated protein N;Small nuclear ribonucleoprotein-associated proteins B and B	Snrpn;SNRPN;SNRPB	3	3	4.1884	26						3.67029e+06	1.05112e+07	6.45792e+06	5.01873e+06	5.86048e+06		1.33809e+07					19.0696	17.6198	19.2786	17.8841	17.5009	21.8075	23.3254	22.6226	22.2589	22.4826	18.9193	23.6737	19.6576	19.3945	19.2763
Q3T0B7;Q2KHT7;Q71UM5;P42677	Q3T0B7;Q2KHT7;Q71UM5;P42677	40S ribosomal protein S27-like;40S ribosomal protein S27	RPS27L;RPS27	2	2	2.5403	11	2126000			647040	1101100	2.11487e+06	2.54462e+06	4.06826e+06	5.03346e+06	6.06042e+06	2.85728e+06		3.16026e+06		7.40243e+06		21.0197	18.1498	18.6912	19.3035	20.0705	21.0121	21.279	21.956	22.2631	22.531	21.4462	19.5009	21.5916	18.5791	22.8196		0.994763			7.7792	5.50397	1.34397				6.72276
Q7JJU6;Q2KJD0;P07437;Q6B856;E1BJB1;Q9BVA1;Q13885;G3X7R7;G3N1W7;E1B953;Q2T9S0;Q9ERD7;Q13509	Q7JJU6;Q2KJD0;P07437;Q6B856;E1BJB1;Q9BVA1;Q13885;G3X7R7;G3N1W7	Tubulin beta chain;Tubulin beta-2B chain;Tubulin beta-2A chain	TUBB;TUBB2B;TUBB2A	7	3	21.851	18	4181500					4.12715e+06	5.85254e+06	4.62119e+06	8.01591e+06	1.24195e+07	1.19613e+07				8.35199e+06		21.9956	18.9329	18.1387	18.0989	17.7174	21.9767	22.4806	22.1398	22.9344	23.5661	23.5119	19.8013	19.5661	19.601	22.9937		0.987001					2.86052
Q3ZBU5;G3MWK4;Q8WXF0;O75494	Q3ZBU5;G3MWK4;Q8WXF0;O75494	Serine/arginine-rich splicing factor 12;Serine/arginine-rich splicing factor 10	SRSF12;SRSF10	2	2	2.9712	33						1.13928e+06	2.56329e+06		4.86166e+06	7.70668e+06	1.03096e+06	1.24105e+07	1.29745e+07	8.774e+06	8.99278e+06		18.8755	17.4508	18.0721	17.9656	17.5831	20.1197	21.2896	17.2511	22.213	22.8777	19.9755	23.5651	23.6292	23.0648	23.1003
G3MZ52;F1N4S2;Q9UFW8	G3MZ52;F1N4S2;Q9UFW8	CGG triplet repeat-binding protein 1	CGGBP1	3	3	2.5692	10							1.54438e+06		3.14915e+06	2.35313e+06		4.18057e+06	4.28964e+06	2.84109e+06	3.39261e+06		18.4544	17.8318	18.0265	17.2352	16.8469	17.8086	20.5586	18.0878	21.5865	21.1661	18.9842	21.9953	22.0324	21.438	21.694
A5D7Q4;P16989	A5D7Q4;P16989	Y-box-binding protein 3	YBX3	8	5	47.265	47						5.62147e+06	2.2622e+06		6.3841e+06	4.63198e+06	2.31077e+07	1.93497e+07		1.01569e+07	9.63829e+06		18.7124	19.2169	18.6298	19.0245	18.6503	22.4225	21.1093	18.3149	22.6061	22.1432	24.4619	24.2058	19.6483	23.276	23.2003
Q16204;F1N091	Q16204;F1N091	Coiled-coil domain-containing protein 6	CCDC6	6	6	10.172	36							2.66177e+06	4.70371e+06	5.90188e+06	7.77687e+06		1.58276e+07	2.44674e+07	1.65312e+07	1.83858e+07		18.5052	18.7459	19.2238	18.7896	18.4136	17.5498	21.344	22.1654	22.4927	22.8908	19.0217	23.9159	24.5444	23.9787	24.1321
F1MEW4;P0DN79;P35520	F1MEW4;P0DN79;P35520	Cystathionine beta-synthase	CBS	4	4	4.6817	13						2.13527e+06	4.5382e+06	1.06895e+06	2.79848e+06			3.92096e+06	3.57185e+06	6.37617e+06	8.12435e+06		17.357	19.4281	17.8323	18.1658	17.7848	21.026	22.1137	20.0278	21.4162	18.4561	19.3593	21.9028	21.7682	22.6043	22.9538
Q0II26	Q0II26	Aminoacyl tRNA synthase complex-int...	AIMP2 JTV1	3	3	12.411	16						3.53425e+06	2.80068e+06	2.14974e+06					5.14976e+06	7.27452e+06	4.44215e+06		18.637	18.5941	18.646	18.0259	17.6438	21.753	21.4173	21.0357	18.255	19.2123	19.3217	19.002	22.2961	22.7944	22.0828
A1A4K3;Q16531	A1A4K3;Q16531	DNA damage-binding protein 1	DDB1	3	3	11.742	25						3.60522e+06	2.46756e+06		6.69943e+06	5.10242e+06			7.83087e+06	2.86313e+06			18.4483	18.6319	17.7209	18.251	17.8707	21.7817	21.2347	17.6325	22.6756	22.2827	20.5827	20.119	22.9007	21.4492	18.2887
P63103;P63104	P63103;P63104	14-3-3 protein zeta/delta	YWHAZ	2	2	3.9731	6					331620					1.64479e+06				827433			19.2775	18.4531	16.4013	18.0569	18.3392	17.5742	18.9705	17.2757	19.0097	20.6495	20.6178	20.0429	18.2325	19.6583	19.5208						4.95986
Q2T9X2;F1N0E5;P50991	Q2T9X2;F1N0E5;P50991	T-complex protein 1 subunit delta	CCT4	4	4	4.3853	3							1.80043e+06	663982							1.16099e+06		18.4172	18.9927	17.5006	18.7571	15.6875	18.0451	20.7799	19.3408	20.1517	18.8919	19.7891	20.7363	19.3082	19.0224	20.1469
Q3B7L6;F1MXY9;Q13247	Q3B7L6;F1MXY9;Q13247	Serine/arginine-rich splicing factor 6	SRSF6	1	1	12.189	11								826885	1.96151e+06	2.88891e+06							18.7761	17.4449	17.6629	16.0848	18.3562	18.3436	18.4717	19.6573	20.9035	21.4621	20.0185	19.2069	18.7834	19.2848	18.5381
G8JKZ8;O97680	G8JKZ8;O97680	Thioredoxin	TXN	5	2	9.1108	18	40145000					2.30002e+07	4.62004e+06	2.48403e+06			8.38712e+07	2.4043e+07	5.86364e+07	8.76492e+06	1.13267e+07		25.2587	19.7705	18.7681	18.3112	17.9313	24.4551	22.1395	21.2442	19.7238	19.1681	26.3217	24.5191	25.8053	23.0633	23.4332		0.572929					2.08921
E1BC93	E1BC93	Uncharacterized protein	PCM1	2	2	4.9287	17	987730		991240			416447	632253	135918		494436	2.9704e+06		2.36157e+06	1.87402e+06	2.72305e+06		19.9138	16.6771	19.9189	17.7606	17.3764	18.6678	19.2701	17.0524	18.5519	18.9154	21.5022	19.8516	21.1713	20.8377	21.3768		0.42162		0.137119			3.0073		2.38244
Q3SYV1;Q8WUH6	Q3SYV1;Q8WUH6	Transmembrane protein 263	TMEM263	4	4	11.886	47	97135000	24935000	20321000	42858000	36296000	5.64361e+07	8.21596e+06	2.6148e+07	5.24629e+07	7.40081e+07	1.58284e+08	1.53296e+08	1.26154e+08	5.54005e+07	4.50158e+07		26.5335	24.5717	24.2765	25.3531	25.1133	25.7501	22.97	24.6402	25.6448	26.1412	27.2379	27.1917	26.9106	25.7234	25.4239		0.581007	0.329495	1.28675	1.22411	2.03902	1.62952	6.14781	6.20807	1.29265	1.24024
G3N309;E1B9R5;Q96JB1;Q91XQ0	G3N309;E1B9R5;Q96JB1;Q91XQ0	Dynein heavy chain 8, axonemal	DNAH8;Dnah8	2	2	5.6154	2					1536600		1.59428e+06	2.34125e+06	2.41345e+06	2.49089e+06		1.07761e+07	2.52208e+07	4.33457e+06	4.14172e+06		19.3423	18.1446	17.2846	16.3763	20.5513	18.9197	20.6045	21.1588	21.2027	21.2482	19.7742	23.3613	24.5881	22.0475	21.9818						1.62104					2.69538
P02316;P05114	P02316;P05114	Non-histone chromosomal protein HMG-14	HMGN1	2	2	12.202	28					3723800	9.24139e+06		321556	3.34176e+07	1.14466e+08		4.17448e+06	4.96938e+06	2.03269e+06	5.06251e+06		18.2544	19.327	18.7981	17.5193	21.8283	23.1397	18.5134	18.2947	24.9941	26.7703	20.3188	21.9932	22.2446	20.955	22.2714						30.7389					1.3595
F1MXK2	F1MXK2	Uncharacterized protein	NUFIP2	3	3	3.2275	10			2196700	1775400	1117500		873506	4.85257e+06	2.92787e+06	4.34249e+06		1.14726e+07	7.44841e+06	5.6885e+06	7.08424e+06		18.4406	18.3452	21.0669	20.7597	20.0918	17.5722	19.7365	22.2103	21.4814	22.0501	19.324	23.4517	22.8285	22.4396	22.7562				2.20903	1.64913	3.8859			3.39073	3.20407	6.33936
Q5E956;P60175;P60174;P17751;Q2QD07	Q5E956;P60175;P60174;P17751;Q2QD07	Triosephosphate isomerase	TPI1;Tpi1	5	5	6.4379	30	5343100	2829000				3.13638e+06	1.1895e+06	952151	3.12814e+06	2.30938e+06	3.20274e+07	3.62756e+06	5.94028e+06	3.45161e+06	3.36762e+06		22.3492	21.4319	19.5117	19.3833	19.0119	21.5807	20.1819	19.8608	21.5769	21.1391	24.9328	21.7906	22.5021	21.7188	21.6833		0.586996	0.420465				5.99416	1.28228
G3N2G7;F1N0J2;P36225;F1MAZ1;F1MAZ3	G3N2G7;F1N0J2;P36225;F1MAZ1;F1MAZ3	Microtubule-associated protein	MAP4	7	7	7.7936	15	3313800				689310	3.4219e+06			3.49707e+06	1.32233e+06	1.7932e+07	1.59159e+06	7.77242e+06		3.6223e+06		21.6601	17.551	17.5415	19.01	19.3948	21.7064	18.2484	17.7498	21.7377	20.3347	24.096	20.602	22.8899	20.0069	21.7885		1.03262				1.91834	5.41131				5.25496
P35749	P35749	Myosin-11	MYH11	30	0	7.5406	41	5580100	12329000	34361000	18152000	27799000	7.20716e+06	1.01387e+07	2.12779e+07	4.46367e+07	6.16784e+07	2.13686e+07	1.03507e+08	9.01091e+07	4.75887e+07	4.65391e+07		22.4119	23.5556	25.0343	24.1136	24.7285	22.781	23.2734	24.3429	25.4117	25.8783	24.349	26.6252	26.4252	25.5041	25.4719		1.29158	0.822343	0.619246	2.45905	2.21873	3.82944	8.3954	2.62242	2.62168	1.67413
P62992;P62979;P79781;P62983;P62982;P63053;P63050;P63048;P0CG67;P0CG65;P0CG60;P0CG62;P0CG53;E1B9K1;P0CG66;P0CH28;P0CG64;P0CG61;P62987;P62986;P62984;P18101;P15357;P0CG47;P0CG49;P0CG48;P0CG50;P40909;P49632;P0C031;P0C030;Q9ARZ9;P51431;Q58G87;Q42202;B9DHA6;Q8RUC6;Q9SHE7;P59271;P59233;P59232;P0CH33;Q3E7K8;Q3E7T8;Q1EC66;Q9FHQ6;P0CH32;Q8H159;Q39256;P62985	P62992;P62979;P79781;P62983;P62982;P63053;P63050;P63048;P0CG67;P0CG65;P0CG60;P0CG62;P0CG53;E1B9K1;P0CG66;P0CH28;P0CG64;P0CG61;P62987;P62986;P62984;P18101;P15357;P0CG47;P0CG49;P0CG48;P0CG50	Ubiquitin-40S ribosomal protein S27a;Ubiquitin;40S ribosomal protein S27a;Ubiquitin-60S ribosomal protein L40;Ubiquitin;60S ribosomal protein L40;Polyubiquitin-B;Ubiquitin;Polyubiquitin-C;Ubiquitin;Polyubiquitin-C;Ubiquitin;Ubiquitin-related 1;Ubiquitin-related 2	RPS27A;Rps27a;UBA52;Uba52;RpL40;RpS27A;UBB;Ubb;UBC;Ubc	10	10	103.69	115	20037000			4959700	7372300	4.28494e+07	1.26895e+07		1.72603e+07	1.28813e+07	3.21848e+07	3.85144e+07	2.17451e+07	5.33292e+07	6.01615e+07		24.2562	19.7616	19.125	22.2418	22.8137	25.3528	23.5971	18.6304	24.041	23.6188	24.9399	25.1989	24.3742	25.6684	25.8423		2.13851			3.48012	1.74726	1.60627			10.7525	8.16048
A6QR15;Q23939	A6QR15	LOC535277 protein	LOC535277 TPM4	45	12	323.31	893	489820000	892660000	693620000	747790000	628470000	9.54373e+08	3.65484e+08	4.27531e+08	1.79825e+09	1.83146e+09	3.4036e+09	1.70607e+09	1.93754e+09	1.32196e+09	1.08233e+09		28.8677	29.7335	29.3696	29.4781	29.2273	29.83	28.4452	28.6715	30.7439	30.7703	31.6644	30.668	30.8516	30.3	30.0115		1.94842	0.409432	0.616376	2.40475	2.91415	6.94867	1.91122	2.79337	1.76782	1.72217
F1MLW8	F1MLW8	Uncharacterized protein		5	2	60.807	49	8258600		2105400	2381100	2155500	7.59865e+07	5.38909e+06	1.66265e+06	1.29066e+06	6.14755e+06	9.31312e+07	1.36475e+07	4.31116e+06	8.08228e+06	7.35197e+06		22.9775	19.7792	21.0057	21.1832	21.0396	26.1792	22.3616	20.6651	20.2997	22.5516	26.4728	23.7021	22.0396	22.9463	22.8097		9.20089		0.789706	0.542045	2.85203	11.2769		2.04767	3.39435	3.4108
P15924;E1BKT9	P15924;E1BKT9	Desmoplakin	DSP	15	15	22.341	52	10946000	970950	3005400	996130	2636600	3.77907e+06	8.75895e+06	8.16627e+06	3.98459e+07	4.46461e+07	2.47288e+07	1.50226e+07	4.17458e+07	4.68351e+06	4.69746e+06		23.3839	19.889	21.5191	19.926	21.3302	21.8496	23.0623	22.9612	25.2479	25.412	24.5597	23.8406	25.3151	22.1592	22.1635		0.345246	9.02101	2.7172	40.0007	16.9332	2.25916	15.4721	13.8903	4.7017	1.78164
P14923;Q8SPJ1	P14923;Q8SPJ1	Junction plakoglobin	JUP	8	8	27.134	50		6786400		3085700	3364700	4.96669e+06	1.22223e+07	6.87145e+06		4.53368e+06	1.29451e+07	3.38228e+07	2.9359e+07	9.39424e+06	5.3785e+06		19.2645	22.6942	17.3883	21.5572	21.682	22.2439	23.543	22.7122	19.0752	22.1123	23.6259	25.0115	24.8073	23.1633	22.3588		#VALUE!	1.801			1.34743	#VALUE!	4.98391		3.04444	1.59851
Q5KR49;P09493;G3X7S7;Q9NAS5;Q9N2R3;Q9UB83;P42636;O97192;O44119;A2V735;A1KYZ2;O96764	Q5KR49;P09493;G3X7S7	Tropomyosin alpha-1 chain	TPM1	48	27	323.31	2474	2562400000	7424000000	5829400000	5682500000	5177100000	6.38018e+09	2.94401e+09	2.84478e+09	1.26918e+10	1.17191e+10	1.4852e+10	1.33345e+10	1.32794e+10	1.01509e+10	9.23127e+09		31.2548	32.7896	32.4407	32.4039	32.2695	32.5709	31.4551	31.4057	33.5632	33.4481	33.7899	33.6344	33.6285	33.2409	33.1039		2.48992	0.396553	0.488006	2.23349	2.26364	5.79613	1.79614	2.278	1.78635	1.7831
P67936	P67936	Tropomyosin alpha-4 chain	TPM4	42	10	239.41	339	197100000	332240000	278140000	294030000	223570000	4.63863e+08	1.78353e+08	1.95255e+08	7.54331e+08	1.07025e+09	9.41424e+08	8.96384e+08	9.45851e+08	5.36226e+08	5.14536e+08		27.5544	28.3076	28.0512	28.1314	27.7362	28.7891	27.4102	27.5408	29.4906	29.9953	29.8103	29.7395	29.817	28.9983	28.9387		2.35344	0.536821	0.702003	2.56549	4.78707	4.77638	2.698	3.40063	1.82371	2.30145
F1MV90	F1MV90	Uncharacterized protein	LOC101904481	15	2	18.665	166	31640000	38253000	55095000	46785000	34806000	8.48625e+07	3.47691e+07	2.69847e+07	1.15259e+08	1.50704e+08	1.63381e+08	1.29117e+08	1.43312e+08	1.10828e+08	1.09534e+08		24.9152	25.1891	25.7154	25.4795	25.0528	26.3386	25.0513	24.6856	26.7803	27.1671	27.2837	26.9441	27.0946	26.7238	26.7068		2.68213	0.908925	0.489785	2.4636	4.32984	5.16375	3.37534	2.60118	2.36889	3.14697
P43276;P16401	P43276;P16401	Histone H1.5	Hist1h1b;HIST1H1B	10	6	18.449	45	6329300	4897900		4670000	5349800	1.94856e+07	6.31112e+06	6.00815e+06	1.01918e+07	4.78203e+06	9.9155e+06	2.03039e+07	2.27231e+07	1.13102e+07	1.62871e+07		22.5936	22.2237	18.3862	22.155	22.3511	24.2159	22.5895	22.5185	23.2809	22.1892	23.2413	24.2753	24.4377	23.4311	23.9572		3.07864	1.28854		2.1824	0.89387	1.5666	4.14543		2.42189	3.04442
Q5KR47;P06753	Q5KR47;P06753	Tropomyosin alpha-3 chain	TPM3	30	4	177.14	203	74106000	84181000	51110000	80314000	80476000	1.56819e+08	3.68165e+07	5.60112e+07	2.12286e+08	2.21686e+08	4.00618e+08	1.95957e+08	1.52613e+08	9.47722e+07	1.38923e+08		26.1431	26.327	25.6071	26.2591	26.2621	27.2245	25.1338	25.7392	27.6614	27.7239	28.5777	27.546	27.1853	26.498	27.0497		2.11614	0.437349	1.0959	2.64321	2.75468	5.40601	2.32781	2.98597	1.18002	1.72626
Q1RMT6;Q16643	Q1RMT6;Q16643	Drebrin	DBN1	31	31	323.31	657	66067000	113900000	66964000	135230000	154350000	1.90051e+08	5.64134e+07	4.52896e+07	6.46676e+08	4.70961e+08	1.24216e+08	1.99465e+08	3.00141e+08	1.89347e+08	2.28113e+08		25.9774	26.7632	25.9969	27.0108	27.2016	27.5018	25.7495	25.4327	29.2685	28.811	26.8883	27.5716	28.1611	27.4965	27.7652		2.87664	0.495289	0.676328	4.78205	3.05125	1.88016	1.75123	4.48213	1.40018	1.47789
A0JNJ5;P85100;P05976;P08590	A0JNJ5;P85100;P05976;P08590	Myosin light chain 1/3, skeletal muscle isoform;Myosin light chain 3	MYL1;MYL3	2	2	92.38	200	317190000	529750000	104350000	515400000	292730000	6.62925e+08	2.41659e+08	1.98132e+08	8.36148e+08	9.88165e+08	1.70927e+09	9.23838e+08	6.8969e+08	6.49286e+08	5.81838e+08		28.2408	28.9807	26.6369	28.9411	28.125	29.3043	27.8484	27.5619	29.6392	29.8802	30.6707	29.7831	29.3614	29.2743	29.116		2.08999	0.456176	1.89872	1.62233	3.37569	5.3888	1.74391	6.60939	1.25977	1.98763
A6QNY2;F1MDB9;O95359	A6QNY2;F1MDB9	TACC2 protein	TACC2	3	3	4.0856	7								2.16798e+06	3.88897e+06			6.69877e+06	5.56822e+06	6.51636e+06	7.61152e+06		18.0043	17.7159	18.4245	17.7899	18.5823	17.9433	17.5427	21.0479	21.891	18.4715	18.6427	22.6755	22.4088	22.6356	22.8598
P62935;P62937;G3X8B1	P62935;P62937;G3X8B1	Peptidyl-prolyl cis-trans isomerase A;Peptidyl-prolyl cis-trans isomerase A, N-terminally processed	PPIA	4	4	7.6078	64	11952000	6326200	9085100	11063000	11770000		6.8419e+06	4.6128e+06	2.47157e+07	2.11372e+07	2.08827e+07	2.25191e+07	1.56402e+07	1.87661e+07	2.08902e+07		23.5107	22.5929	23.1151	23.3992	23.4886	19.2078	22.706	22.1372	24.5589	24.3333	24.3158	24.4246	23.8988	24.1616	24.3163			1.08152	0.507733	2.23409	1.79585	1.74722	3.55965	1.72152	1.6963	1.77487
P60661;P60660;P14649	P60661;P60660	Myosin light polypeptide 6	MYL6	20	20	323.31	528	4102200000	2897500000	2626300000	3796000000	2541600000	5.38004e+09	1.62967e+09	1.4953e+09	7.38801e+09	6.27451e+09	1.48054e+10	5.2051e+09	4.78641e+09	4.62419e+09	4.21593e+09		31.9338	31.4322	31.2904	31.8218	31.2431	32.325	30.6019	30.4778	32.7825	32.5469	33.7854	32.2773	32.1563	32.1066	31.9732		1.3115	0.562441	0.569355	1.94626	2.46873	3.60913	1.79641	1.82249	1.21817	1.65877
D3JUI8;A5A6M3;P38159;O75526;Q96E39;Q29RT0	D3JUI8;A5A6M3;P38159	RNA-binding motif protein, X chromosome;RNA-binding motif protein, X chromosome, N-terminally processed	RBMX	11	11	86.896	276	47684000	31598000	44805000	34675000	39465000	5.67465e+07	6.63849e+07	8.15707e+07	2.14839e+08	2.21704e+08	72026200	2.37209e+08	2.9012e+08	2.19573e+08	2.16307e+08		25.507	24.9133	25.4172	25.0474	25.2341	25.758	25.9844	26.2815	27.6787	27.7241	26.102	27.8216	28.1121	27.7101	27.6885		1.19005	2.10092	1.82057	6.19578	5.61774	1.51049	7.5071	6.47518	6.33231	5.48097
Q3ZC44;Q99729	Q3ZC44;Q99729	Heterogeneous nuclear ribonucleoprotein A/B	HNRNPAB	5	5	8.5644	36				6390900	3994700	5.82026e+06	2.27883e+06		1.01922e+07	1.11746e+07	8.32673e+06	9.997e+06	5.9902e+06	1.26473e+07	9.40734e+06		17.7108	17.6659	17.9739	22.6076	21.9297	22.4727	21.1199	19.099	23.281	23.4137	22.9893	23.2531	22.5142	23.5923	23.1654					1.5948	2.79735				1.97896	2.35496
Q08499;F1MHA7;F1MS27	Q08499;F1MHA7;F1MS27	cAMP-specific 3,5-cyclic phosphodiesterase 4D	PDE4D	2	2	8.6013	12								2.05045e+06		2.27773e+06			4.24213e+06	2.63478e+06	4.10588e+06		18.6769	17.4253	19.5672	17.972	18.7266	17.7229	17.6818	20.9675	18.7668	21.1192	18.941	20.3522	22.0164	21.3292	21.9693
P51991;E1BEG2;G3N220	P51991;E1BEG2	Heterogeneous nuclear ribonucleoprotein A3	HNRNPA3	15	15	53.607	170	35535000	29114000	32459000	29471000	26442000	2.76693e+07	4.75754e+07	2.97901e+07	1.46957e+08	8.86593e+07	5.4419e+07	1.03878e+08	1.26652e+08	6.40712e+07	6.1482e+07		25.0827	24.7952	24.9521	24.8128	24.6563	24.7218	25.5037	24.8283	27.1308	26.4018	25.6976	26.6303	26.9163	25.9332	25.8737		0.77865	1.63411	0.917775	4.9865	3.35297	1.53142	3.56798	3.90189	2.17404	2.32517
P19483;F1MLB8;A5A6H5;P25705	P19483;F1MLB8;A5A6H5;P25705	ATP synthase subunit alpha, mitochondrial	ATP5A1	6	6	29.278	40	5811100	2523300		504050	745110	5.7665e+06	6.74908e+06	5.54399e+06	1.37425e+06	1.91117e+06	4.62646e+06	9.17947e+06	6.66475e+06	5.2232e+06	4.10053e+06		22.4704	21.2669	18.2461	18.9432	19.5071	22.4593	22.6863	22.4025	20.3902	20.866	22.1415	23.13	22.6681	22.3165	21.9674		0.992325	2.67471		2.72641	2.56495	0.796142	3.63788		10.3625	5.50326
P15246;G3MZZ6;P22061	P15246;G3MZZ6;P22061	Protein-L-isoaspartate(D-aspartate) O-methyltransferase	PCMT1	14	14	103.13	253	79761000	40092000	40141000	149240000	120780000	3.21054e+07	1.64958e+08	2.08184e+08	1.83848e+08	2.03292e+08	1.1761e+08	2.85657e+08	3.02424e+08	2.29135e+08	2.31289e+08		26.2492	25.2568	25.2586	27.1531	26.8478	24.9363	27.2975	27.6333	27.4539	27.599	26.8094	28.0897	28.172	27.7716	27.7851		0.40252	4.11449	5.18633	1.23189	1.68316	1.47453	7.12503	7.53403	1.53535	1.91496
A5D9H5;A6H6Y0;Q14103	A5D9H5;A6H6Y0;Q14103	Heterogeneous nuclear ribonucleoprotein D0	HNRNPD	6	6	10.455	38	8680000	10708000	8011600	11901000	10052000	8.60527e+06	1.80813e+07	1.61785e+07	4.57205e+07	2.30752e+07	1.81799e+07	5.3838e+07	2.4987e+07	2.96329e+07	4.40301e+07		23.0493	23.3522	22.9337	23.5046	23.261	23.0368	24.108	23.9476	25.4463	24.4598	24.1158	25.6821	24.5747	24.8207	25.392		0.991391	1.68858	2.01939	3.84174	2.29558	2.09445	5.02783	3.11885	2.48995	4.38023
Q5E9F7;P23528	Q5E9F7;P23528	Cofilin-1	CFL1	12	11	25.024	83	10944000	8643000	8736300	13939000	13477000	8.82272e+06	1.10907e+07	1.28373e+07	3.44857e+07	2.8554e+07	3.41757e+07	2.01252e+07	1.92139e+07	1.96818e+07	2.05333e+07		23.3836	23.0431	23.0586	23.7326	23.684	23.0728	23.4028	23.6138	25.0395	24.7672	25.0265	24.2625	24.1957	24.2304	24.2915		0.80617	1.2832	1.46942	2.47405	2.11872	3.12278	2.3285	2.19932	1.412	1.52358
P19120;P63017;P11142;P54652;P34933;P27541;Q92260;P0CB32;P40918;Q96W30;P10592;P34931;P10591	P19120;P63017;P11142	Heat shock cognate 71 kDa protein	Hspa8;HSPA8	23	18	111.25	331	51600000	81524000	65759000	150400000	117060000	3.86957e+07	1.26346e+08	1.10166e+08	1.39706e+08	1.51354e+08	8.82504e+07	2.23423e+08	1.94292e+08	1.8476e+08	1.59994e+08		25.6209	26.2807	25.9707	27.1642	26.8027	25.2057	26.9128	26.7151	27.0578	27.1734	26.3951	27.7352	27.5337	27.4611	27.2534		0.749916	1.5498	1.67531	0.928897	1.29296	1.71028	2.74058	2.95461	1.22846	1.36677
F1N5H8	F1N5H8	RNA helicase	DDX31	4	4	3.3377	7	3875700					2.49901e+06	1.76699e+06	2.02809e+06		2.48735e+06	4.3477e+06	2.84105e+06		3.48548e+06	3.73722e+06		21.886	19.4502	19.2454	17.1827	15.9812	21.2529	20.7529	20.9517	20.3714	21.2462	22.0518	21.438	20.5388	21.7329	21.8335		0.644789					1.12178
F1MEB7;Q75N03	F1MEB7;Q75N03	E3 ubiquitin-protein ligase Hakai	CBLL1	4	4	5.6275	3							1.04421e+06	1.68435e+06				1.94208e+06	2.29049e+06	1.19245e+06	1.78843e+06		18.7172	18.8567	17.2903	17.9214	17.5385	18.6485	19.994	20.6838	18.6464	19.9861	18.6977	20.8892	21.1272	20.1855	20.7703
V6F7T1;F1N690;P10515	V6F7T1;F1N690	Acetyltransferase component of pyru...	DLAT BOS_14388	3	3	5.9161	14	3965200					2.50355e+06			4.30581e+06	3.16611e+06	4.50252e+06	5.3893e+06	5.66119e+06	5.59159e+06	5.11894e+06		21.919	18.0185	19.084	18.004	17.6217	21.2555	18.8328	18.6821	22.0379	21.5943	22.1023	22.3617	22.4327	22.4148	22.2874		0.631382					1.13551
Q56JZ1;F1MK30;P26373	Q56JZ1;F1MK30;P26373	60S ribosomal protein L13	RPL13	4	4	9.3169	34	2185800	4030000	2768600	1336300	3680700	1.73353e+06	9.9042e+06	2.52685e+07	2.79691e+06	2.62419e+06	3.50255e+06	3.4573e+06	4.96196e+06	5.69385e+06	7.04148e+06		21.0597	21.9423	21.4007	20.3498	21.8115	20.7253	23.2396	24.5908	21.4154	21.3234	21.74	21.7212	22.2425	22.441	22.7474		0.793086	2.45762	9.12681	2.09303	0.712958	1.60241	0.857891	1.79223	4.26091	1.91308
Q3ZC35;P18406;A5A6L1;O00622	Q3ZC35;P18406	Protein CYR61	Cyr61	6	6	14.411	29				1685400	1777200	1.52139e+06	3.10451e+06	5.5592e+06	4.23473e+06	3.98561e+06	5.61896e+06	3.25797e+06	3.75705e+06	3.13363e+06	3.28712e+06		16.951	18.9733	17.7328	20.6847	20.7612	20.537	21.5659	22.4064	22.0138	21.9264	22.4219	21.6355	21.8412	21.5794	21.6484					2.5126	2.24264				1.85928	1.84961
F2Z4E7;Q12905	F2Z4E7;Q12905	Interleukin enhancer-binding factor 2	ILF2	1	1	35.683	17				1081300	1444000		2.01605e+06	3.30927e+06	3.70834e+06	2.16454e+06		3.56747e+06	4.12559e+06	2.08406e+06	3.42861e+06		18.2755	17.81	17.6416	20.0443	20.4616	17.9751	20.9431	21.6581	21.8223	21.0456	19.9364	21.7665	21.9762	20.991	21.7092					3.42952	1.49899				1.92737	2.37439
Q862I1;P83731	Q862I1;P83731	60S ribosomal protein L24	RPL24	8	8	9.7072	24	3060300	1236100				3.02055e+06	3.48514e+06	2.91325e+06	5.63486e+06		2.53917e+06		5.7163e+06	5.11056e+06	6.10419e+06		21.5452	20.2374	18.0844	17.8669	16.794	21.5264	21.7328	21.4742	22.4259	19.2629	21.2759	20.1835	22.4466	22.285	22.5414		0.98701	2.81946				0.829714
F1MZ00;P62318	F1MZ00;P62318	Small nuclear ribonucleoprotein Sm D3	SNRPD3	2	2	2.1464	5	4415200			2710300		5.1678e+06			1.04162e+07	7.36805e+06	8.93403e+06	1.79084e+07	1.0154e+07	7.7421e+06	8.08489e+06		22.074	17.4757	17.3147	21.37	17.1333	22.3011	18.2115	18.9204	23.3123	22.8129	23.0909	24.0941	23.2755	22.8843	22.9468		1.17046			3.84319		2.02347			2.85655
P49410;P49411	P49410;P49411	Elongation factor Tu, mitochondrial	TUFM	2	2	4.4915	7				888440			1.75673e+06	2.00376e+06	3.19882e+06	2.45906e+06	1.74705e+06	3.08633e+06		2.46898e+06	2.4091e+06		18.6577	18.8983	18.7058	19.7609	18.5394	18.5917	20.7445	20.9343	21.6091	21.2297	20.7365	21.5575	18.5514	21.2355	21.2001					3.6005					2.779
Q24JY1;E1BII3;E1BED6;E1BB71;P62750;E1B983	Q24JY1;E1BII3;E1BED6;E1BB71;P62750;E1B983	60S ribosomal protein L23a	RPL23A	4	4	6.2679	24	4038300				4666300	4.05415e+06	2.96232e+06		9.43567e+06	7.11114e+06	5.46649e+06	4.7652e+06	4.37463e+06	7.44421e+06	6.50287e+06		21.9453	17.2995	17.5726	18.7327	22.1538	21.951	21.4983	17.5116	23.1697	22.7617	22.3822	22.1841	22.0607	22.8277	22.6326		1.00392				1.52394	1.35366				1.39358
Q3ZBH8;P60866	Q3ZBH8;P60866	40S ribosomal protein S20	RPS20	3	3	4.7153	40		1045500	987890	2420400	2681900	1.2409e+06	3.42745e+06	2.89599e+06	3.45309e+06	4.92295e+06	2.92417e+06	3.85399e+06	2.64419e+06	2.7351e+06	3.08369e+06		18.3554	19.9958	19.914	21.2068	21.3548	20.243	21.7087	21.4656	21.7195	22.2311	21.4796	21.8779	21.3344	21.3832	21.5562			3.27829	2.93149	1.42666	1.83562		3.68626	2.6766	1.13002	1.14982
Q6UWP8	Q6UWP8	Suprabasin	SBSN	3	3	5.6448	13									4.14245e+06	1.32134e+06			3.28014e+06		1.52092e+06		18.764	18.3444	17.4868	19.1597	18.0353	18.9297	18.7125	17.5328	21.9821	20.3336	20.5143	18.7186	21.6453	18.4606	20.5365
Q27975;Q27965;P0DMV9;P0DMV8	Q27975;Q27965;P0DMV9;P0DMV8	Heat shock 70 kDa protein 1B;Heat shock 70 kDa protein 1A	HSPA1B;HSPA1A	6	5	7.9987	34	4164600			4413900	2785700	4.29703e+06	5.95482e+06	8.79737e+06	9.45157e+06	7.19678e+06	5.04962e+06	9.62211e+06	7.00917e+06	9.69715e+06	7.93868e+06		21.9897	18.0388	17.8653	22.0736	21.4096	22.0349	22.5056	23.0686	23.1721	22.7789	22.2677	23.1979	22.7408	23.2091	22.9205		1.0318			2.14132	2.58347	1.21251			2.19696	2.8498
P55081;Q5EA98	P55081;Q5EA98	Microfibrillar-associated protein 1	MFAP1	3	3	3.0372	5									1.52894e+06			2.44024e+06	2.5618e+06	1.71454e+06	1.64112e+06		19.7839	17.9026	17.8089	18.3496	17.9701	17.8371	17.71	17.5404	20.5441	18.0582	18.8126	21.2186	21.2887	20.7094	20.6463
Q5EA36;F1MI47;Q96PK6	Q5EA36;F1MI47;Q96PK6	RNA-binding protein 14	RBM14	1	1	2.2837	8									2.03765e+06	1.50585e+06			1.69051e+06	2.09492e+06	1.71344e+06		17.2158	17.9245	18.3799	18.1879	18.8666	18.4666	19.6616	16.9464	20.9585	20.5222	18.5234	19.355	20.689	20.9985	20.7085
A6QLG5;P46781	A6QLG5;P46781	40S ribosomal protein S9	RPS9	1	1	2.563	6	667390						1.9005e+06	338332	1.66721e+06	2.99186e+06	1.86392e+06		768594	782378	1.26674e+06		19.3482	17.8108	17.6423	18.3135	18.6356	16.8823	20.8579	18.3681	20.669	21.5126	20.8299	18.8895	19.5519	19.5775	20.2727							2.79285
P32007;P12236;P02722;G3N3W3;P48962;P12235	P32007;P12236	ADP/ATP translocase 3;ADP/ATP translocase 3, N-terminally processed	SLC25A6	4	3	5.3376	4	1595900	541850					2.40527e+06	2.78059e+06	2.80712e+06	2.06494e+06	4.44055e+06			2.58972e+06	2.3536e+06		20.6059	19.0475	17.3549	17.9325	18.0589	19.6406	21.1978	21.407	21.4207	20.9777	22.0823	19.8488	19.8736	21.3044	21.1664			4.43899				2.78248
Q5E9J1;P52597;E1BMP6	Q5E9J1;P52597	Heterogeneous nuclear ribonucleoprotein F;Heterogeneous nuclear ribonucleoprotein F, N-terminally processed	HNRNPF	4	2	4.6885	35				923910	2040300	1.04984e+06	3.63883e+06	1.19216e+07	5.40533e+06	5.17632e+06		3.44611e+06	4.13302e+06	4.1229e+06	3.22204e+06		19.2415	17.4531	18.977	19.8174	20.9604	20.0017	21.795	23.5071	22.366	22.3035	18.9513	21.7165	21.9788	21.9752	21.6195					5.85049	2.53704				4.46245	1.5792
M5FHN8;A4FV97	M5FHN8;A4FV97	Ribosomal L1 domain-containing prot...	RSL1D1 BOS_22456	2	2	2.378	8									1.54573e+06				874406	837109	1.07388e+06		18.5343	18.7923	18.6022	17.5119	17.5497	17.9648	18.8976	17.6689	20.5599	17.357	20.7943	19.1278	19.7379	19.6751	20.0344
Q56JY8;P20290	Q56JY8;P20290	Transcription factor BTF3	BTF3	1	1	2.4792	4					1057800				7.51347e+06	6.52863e+06	2.37372e+06			2.08341e+06	2.36052e+06		18.2119	17.5169	18.0049	18.8775	20.0126	18.0784	17.916	17.4253	22.841	22.6383	21.1787	19.1379	20.1562	20.9905	21.1707						6.17189					2.23154
Q7YRV4;G3MWU8	Q7YRV4;G3MWU8	E3 ubiquitin-protein ligase TRIM21	TRIM21	6	6	8.0453	39				1319700	1499000		2.94135e+06	8.99957e+06	4.03466e+06	5.01995e+06	4.69079e+06	4.58532e+06	8.67151e+06				17.8951	18.1815	17.7593	20.3318	20.5156	18.2023	21.488	23.1014	21.944	22.2592	22.1614	22.1286	23.0479	18.9858	19.2274					3.05725	3.34886
F1MCK2	F1MCK2	Neuroblast differentiation-associated protein AHNAK	AHNAK	34	22	63.348	222	81745000	4511700		39455000	29802000	2.68929e+07	3.41241e+07	3.58783e+07	4.34252e+07	3.98375e+07	5.66834e+07	1.16653e+08	7.74236e+07	4.99971e+07	4.70847e+07		26.2846	22.1052	18.5811	25.2337	24.8289	24.6807	25.0243	25.0966	25.372	25.2476	25.7564	26.7976	26.2063	25.5753	25.4888		0.328986	7.56347		1.10063	1.33674	0.693417	25.8556		1.26719	1.57992
G3X6L9;P07814	G3X6L9	Uncharacterized protein	EPRS	5	5	13.744	15													3.57334e+06	3.22812e+06			19.3591	19.6462	18.2325	17.7598	19.4507	18.4483	18.7819	17.6792	19.6707	19.4972	18.5463	20.7785	21.7688	21.6223	19.9327
Q8NC51;A1L5B7;Q2KJD1	Q8NC51;A1L5B7	Plasminogen activator inhibitor 1 RNA-binding protein	SERBP1	9	9	90.666	177	14326000	89384000	89109000	33498000	38708000	1.65917e+07	1.50616e+07	1.49439e+07	4.81218e+07	5.71695e+07	4.55918e+07	5.55073e+07	5.9041e+07	8.0228e+07	7.48135e+07		23.7721	26.4135	26.4091	24.9976	25.2061	23.984	23.8444	23.8331	25.5202	25.7687	25.4423	25.7262	25.8152	26.2576	26.1568		1.15816	0.168504	0.167704	1.43656	1.47694	3.18245	0.620998	0.66257	2.39501	1.93277
F1ME65	F1ME65	Uncharacterized protein	CKAP4	6	4	6.9923	15	3953300		4915300	3722800	2334800	3.07092e+06	4.40177e+06	2.55085e+06	4.6983e+06	4.58246e+06	4.6906e+06	8.83266e+06	5.51793e+06	4.9788e+06	4.83376e+06		21.9146	18.962	22.2288	21.828	21.1549	21.5502	22.0697	21.2825	22.1637	22.1277	22.1613	23.0744	22.3957	22.2474	22.2047		0.7768		0.518961	1.26203	1.96268	1.1865		1.1226	1.33738	2.07031
A8E651;Q01844	A8E651;Q01844	RNA-binding protein EWS	EWSR1	4	4	37.759	89	39051000	35738000	73496000	8680100	6933200	2.13904e+07	3.32906e+07	3.25099e+07	1.86475e+07	1.65613e+07	7.53863e+07	3.86518e+07	5.64857e+07	3.56036e+07	2.20363e+07		25.2189	25.091	26.1312	23.0493	22.7251	24.3505	24.9886	24.9544	24.1525	23.9813	26.1678	25.204	25.7514	25.0855	24.3934		0.547755	0.93152	0.442336	2.14831	2.38869	1.93046	1.08153	0.768555	4.10175	3.17837
P81605	P81605	Dermcidin;Survival-promoting peptide;DCD-1	DCD	5	5	24.837	95	118500000	18230000	21611000	18221000	14277000	8.19628e+07	1.82326e+07	2.44597e+07	1.14272e+07	1.10889e+07	7.3421e+08	3.88541e+07	2.94852e+07	1.32097e+08	7.3004e+07		26.8203	24.1198	24.3653	24.1191	23.7672	26.2885	24.12	24.5439	23.446	23.4026	29.4516	25.2116	24.8135	26.977	26.1215		0.691669	1.00014	1.13182	0.627143	0.776699	6.19587	2.13133	1.36436	7.24971	5.1134
E1BC32	E1BC32	Uncharacterized protein		9	5	253.07	11			4715500	6044500	5414800				4.55556e+06			1.01946e+07		8.79085e+06	7.51405e+06		18.1126	19.5226	22.169	22.5272	22.3685	18.0664	18.5611	17.7832	22.1192	18.24	18.9678	23.2813	19.1697	23.0676	22.8412					0.75367					1.45436	1.38769
E1B8K6;G3MYJ0;G3X7M4;G3MXT4;P19338	E1B8K6;G3MYJ0;G3X7M4;G3MXT4;P19338	Nucleolin	NCL	13	13	41.467	88	37999000		2233200	9201200	7096500	3.48697e+06	6.91038e+06	7.11392e+06	1.81698e+07	1.68036e+07	2.20355e+07	2.06515e+07	2.51225e+07	1.47093e+07	9.10267e+06		25.1795	18.3215	21.0907	23.1334	22.7587	21.7335	22.7203	22.7622	24.115	24.0023	24.3933	24.2997	24.5825	23.8102	23.1179		0.0917648		3.18553	1.97472	2.36788	0.579898		11.2495	1.59863	1.2827
Q9NYL9;Q9JHJ0;Q9NZR1	Q9NYL9;Q9JHJ0	Tropomodulin-3	TMOD3;Tmod3	10	2	125.62	304	34115000	113760000	123010000	277930000	234150000	5.15804e+07	3.84011e+07	5.54514e+07	3.37966e+08	2.82897e+08	1.22517e+08	3.93824e+08	2.61932e+08	2.56347e+08	2.93387e+08		25.0239	26.7614	26.8742	28.0501	27.8029	25.6203	25.1946	25.7247	28.3323	28.0757	26.8684	28.553	27.9646	27.9335	28.1282		1.51196	0.337563	0.450788	1.21601	1.20819	3.59128	3.46188	2.12936	0.922342	1.25299
A7MBI5;Q14195;E1BER6;Q14194	A7MBI5;Q14195	Dihydropyrimidinase-related protein 3	DPYSL3	7	6	24.661	32	5918500	15016000	10957000	16725000	13079000	8.12521e+06	1.56774e+07	1.18739e+07	1.49841e+07	1.33767e+07	1.1628e+07	1.38017e+07	1.82599e+07	2.42911e+07	2.05176e+07		22.4968	23.84	23.3853	23.9955	23.6407	22.954	23.9022	23.5013	23.8369	23.6732	23.4711	23.7183	24.1222	24.5339	24.2904		1.37285	1.04404	1.08369	0.895912	1.02276	1.96469	0.919133	1.66651	1.45238	1.56874
Q5E9D5;P60981	Q5E9D5;P60981	Destrin	DSTN	3	3	3.6545	15	1811500	2998200		2805900	2618300		2.94958e+06	1.95535e+06	4.56066e+06	4.05449e+06	2.92653e+06	4.91818e+06	6.41943e+06	5.40909e+06	5.46072e+06		20.7888	21.5157	16.7716	21.42	21.3202	18.0078	21.4921	20.899	22.1208	21.9511	21.4808	22.2297	22.614	22.367	22.3807			0.983785		1.62538	1.54852	1.61553	1.64038		1.92776	2.0856
Q95140;F1MDN4;Q8NHW5;P14869;P05388	Q95140;F1MDN4;Q8NHW5;P14869;P05388	60S acidic ribosomal protein P0-like;60S acidic ribosomal protein P0	RPLP0P6;Rplp0;RPLP0	3	3	5.8016	19	8606800	507210	3194200	5634300	7760000	7.24893e+06	3.25943e+06	3.50095e+06	5.25866e+06	4.48453e+06	1.42244e+07	1.02888e+07	1.37777e+07	4.20702e+06	3.62324e+06		23.037	18.9522	21.607	22.4258	22.8876	22.7893	21.6362	21.7393	22.3263	22.0965	23.7619	23.2946	23.7158	22.0044	21.7888		0.842232	6.4262	1.09603	0.93333	0.577904	1.6527	20.2851	4.31333	0.74668	0.466912
Q8J1H3;Q1DTF9	Q8J1H3;Q1DTF9	Glyceraldehyde-3-phosphate dehydrog...	GPD CPC735_029060	1	1	2.5579	14	4763600	3247200	3020100	2631100			4.45264e+06	3.92129e+06			6.46115e+06		3.93427e+06	4.20524e+06	4.74258e+06		22.1836	21.6308	21.5262	21.3272	17.1258	18.7531	22.0862	21.9029	20.4156	18.5393	22.6234	20.1697	21.9077	22.0038	22.1772			1.37123	1.2984			1.35636		1.3027	1.59828
Q58DT1;P18124;E1B7T4;F1N7A3;E1BLQ8	Q58DT1;P18124;E1B7T4	60S ribosomal protein L7	RPL7	6	6	8.5265	56	33546000	43163000	62539000	21143000	14459000	1.84414e+07	2.39182e+07	7.1468e+07	1.99661e+07	1.41286e+07	7.16268e+07	4.02877e+07	3.53975e+07	4.36423e+07	2.81942e+07		24.9996	25.3633	25.8983	24.3337	23.7855	24.1364	24.5116	26.0908	24.2511	23.7521	26.094	25.2638	25.0771	25.3792	24.7489		0.549734	0.554137	1.14278	0.944339	0.977152	2.13518	0.933385	0.566007	2.06415	1.94994
P31081;F1MUZ9;P10809;O02649	P31081;F1MUZ9;P10809	60 kDa heat shock protein, mitochondrial	HSPD1	3	3	6.1288	11	1617900										2.57498e+06						20.6257	17.7421	19.5891	18.5458	17.3301	18.1373	18.5911	17.9311	17.5651	18.7436	21.2961	20.2561	17.1859	19.5852	18.6139							1.59156
Q3T0W9;P84098;F1N2W8	Q3T0W9;P84098;F1N2W8	60S ribosomal protein L19	RPL19	6	6	6.9228	24	6198100	17093000	13506000	3354600	5222100	5.57554e+06	1.24586e+07	8.43982e+06	8.23739e+06	6.4806e+06	1.20349e+07	1.28439e+07	1.86294e+07	7.05832e+06	8.09306e+06		22.5634	24.0269	23.6871	21.6777	22.3162	22.4107	23.5706	23.0088	22.9738	22.6277	23.5207	23.6146	24.1511	22.7509	22.9483		0.899556	0.728869	0.624894	2.45555	1.24099	1.9417	0.751416	1.37934	2.10407	1.54977
F6RSR1	F6RSR1	Uncharacterized protein	HNRNPA0	3	3	5.2174	21				1008600	1514400				4.92998e+06	2.34289e+06		4.34789e+06	4.02836e+06	1.8912e+06	2.68265e+06		20.0391	16.9204	18.9904	19.9439	20.5303	19.0366	19.4956	17.9864	22.2332	21.1599	19.7335	22.0519	21.9418	20.8509	21.3552					4.88795	1.54707				1.87507	1.77143
Q08DQ6	Q08DQ6	Zyxin	ZYX	11	11	79.789	63	84002000	4087300	4897800	2192600	2667400	1.454e+07	2.58868e+06	404574	1.20156e+07	7.86362e+06	1.19105e+08	1.06898e+07	2.48831e+06	1.34575e+07	1.4714e+07		26.3239	21.9627	22.2237	21.0642	21.347	23.7935	21.3038	18.626	23.5184	22.9068	26.8277	23.3497	21.2467	23.6819	23.8107		0.173091	0.633348	0.0826031	5.48008	2.94805	1.41789	2.61538	0.508046	6.13769	5.51623
F1MQH8	F1MQH8	Uncharacterized protein	RABEP1	1	1	2.669	22		20978000		12410000	16766000	1.0569e+07		917218	5.84593e+07		1.79176e+07	734035	1.31296e+07	2.07969e+07	3.73958e+07		19.1858	24.3224	18.8229	23.565	23.999	23.3333	16.0698	19.8069	25.8009	18.8305	24.0949	19.4855	23.6463	24.3099	25.1564					4.71066			0.0349907		1.67581	2.23045
Q27991;E1B7E3;Q13439	Q27991	Myosin-10	MYH10	289	53	323.31	9288	2437900000	9208700000	8226500000	12478000000	10953000000	5.01977e+09	6.29723e+09	6.23591e+09	1.55272e+10	1.63075e+10	8.90314e+09	1.36279e+10	1.17286e+10	1.40106e+10	1.32169e+10		31.183	33.1003	32.9376	33.5387	33.3506	32.225	32.5521	32.538	33.8541	33.9248	33.0517	33.6658	33.4493	33.7058	33.6217		2.05906	0.683835	0.758028	1.24437	1.48886	3.65197	1.47989	1.42571	1.12283	1.20669
G3X6Z3;Q3SZF8;P62316	G3X6Z3;Q3SZF8;P62316	Small nuclear ribonucleoprotein Sm D2	SNRPD2	3	3	3.1385	3					2814900				4.98437e+06	5.21319e+06		1.29359e+07	1.00174e+07		1.07702e+07		19.5945	19.3922	20.2089	19.1129	21.4247	18.8496	17.6376	17.2684	22.249	22.3137	19.4311	23.6249	23.256	18.4177	23.3605						1.852					3.82614
P62866;E1BH19;H7BWV9;P62861	P62866;E1BH19;H7BWV9;P62861	40S ribosomal protein S30	FAU	2	2	2.4073	40	6366700	7016000	6562300	11242000	11970000	7.70065e+06	1.65188e+07	1.80353e+07	1.03004e+07	7.02439e+06	2.09358e+07	1.03289e+07	1.12957e+07	1.69671e+07	1.72791e+07		22.6021	22.7422	22.6458	23.4224	23.5129	22.8766	23.9776	24.1043	23.2962	22.7439	24.3195	23.3002	23.4293	24.0162	24.0425		1.20952	2.35445	2.74832	0.91624	0.586833	3.28833	1.47219	1.72129	1.50926	1.44353
Q00839	Q00839	Heterogeneous nuclear ribonucleoprotein U	HNRNPU	8	3	22.399	54	16881000	8416500	15763000	19815000	12158000	1.30375e+06	1.58977e+07	1.84537e+07	1.55942e+07	1.73746e+07	1.35774e+07	2.41981e+07	4.24454e+07	1.01631e+07	2.33961e+07		24.0089	23.0048	23.91	24.2401	23.5354	20.3142	23.9223	24.1374	23.8945	24.0505	23.6947	24.5284	25.3391	23.2768	24.4798		0.0772316	1.88887	1.1707	0.786988	1.42907	0.804301	2.87508	2.69273	0.512899	1.92434
Q1JP79;Q92747	Q1JP79;Q92747	Actin-related protein 2/3 complex subunit 1A	ARPC1A	1	1	2.2981	4			493780	7928000	4785300				1.25065e+06	1.13313e+06		1.27395e+06	1.61633e+06	852392			18.0039	18.3774	18.9135	22.9185	22.1902	18.2851	18.0716	18.748	20.2542	20.1119	20.0925	20.2809	20.6243	19.7012	18.3411					0.157751	0.236794			3.27339	0.107517
Q58DW0;P36578;G3MXR5;P09180	Q58DW0;P36578	60S ribosomal protein L4	RPL4	10	10	23.684	57	12352000	5493600	3065700	4245700	1318100	1.51714e+07	1.74009e+06	7.60792e+06	3.13914e+06		9.40204e+06	1.83055e+06	1.26546e+07	8.00757e+06	1.19293e+07		23.5582	22.3893	21.5478	22.0176	20.33	23.8548	20.7307	22.8591	21.5819	19.6199	23.1645	20.8038	23.5932	22.9329	23.508		1.22825	0.316749	2.48163	0.739368		0.761176	0.333215	4.1278	1.88604	9.05039
Q86SG5;P31151	Q86SG5;P31151	Protein S100-A7A;Protein S100-A7	S100A7A;S100A7	1	1	12.638	3	1047700								1.23871e+06		3.19644e+06						19.9988	17.9971	17.5752	19.6542	16.9912	18.2252	17.8628	16.9977	20.2404	18.8253	21.608	17.6491	20.0605	18.2297	19.599							3.05091
P63258;P63261	P63258;P63261	Actin, cytoplasmic 2;Actin, cytoplasmic 2, N-terminally processed	ACTG1	47	4	323.31	982	5130800000	2377200000	1594200000	4286800000	3668300000	6.0673e+09	1.84423e+09	1.31545e+09	6.47108e+09	5.4068e+09	8.95173e+09	7.49e+09	4.82352e+09	3.36814e+09	4.01564e+09		32.2565	31.1466	30.5702	31.9973	31.7725	32.4984	30.7804	30.2929	32.5914	32.3321	33.0595	32.8023	32.1674	31.6493	31.903		1.18252	0.7758	0.82515	1.50954	1.47392	1.7447	3.15076	3.02567	0.785701	1.09469
Q56JX6;P62857	Q56JX6;P62857	40S ribosomal protein S28	RPS28	4	4	9.3944	14	9889700					2.20711e+06			2.4054e+06		2.0387e+07	4.65444e+06			4.84807e+06		23.2375	18.5411	17.638	18.3967	19.2686	21.0737	17.8852	18.6404	21.1978	19.1526	24.2811	22.1502	18.804	17.911	22.209		0.223172					2.06143
P06702	P06702	Protein S100-A9	S100A9	2	2	4.1021	8	4560700					2.30293e+06	738604				4.56134e+06			2.05926e+06	1.5894e+06		22.1208	18.256	18.7345	17.9574	17.2238	21.135	19.4944	18.0525	19.0148	19.5342	22.121	19.0757	18.7826	20.9737	20.6001		0.50495					1.00014
F1MF78;Q8WXH0	F1MF78;Q8WXH0	Nesprin-2	SYNE2	2	2	3.069	57	136030000		14708000	9588400	32643000		9.07693e+06		1.2348e+08	7.85897e+07	1.6827e+08	6.0079e+07	9.36201e+07		8.18975e+07		27.0194	17.6518	23.8101	23.1929	24.9603	18.8938	23.1138	17.9012	26.8797	26.2278	27.3262	25.8404	26.4803	19.5605	26.2873					12.8781	2.40755	1.237		6.36525		2.50888
E1BBW0;F1MP70;Q9Y608;Q2T9W6	E1BBW0;F1MP70;Q9Y608;Q2T9W6	Leucine-rich repeat flightless-interacting protein 2	LRRFIP2	19	19	95.387	267	4224600	42977000	64304000	56588000	41458000	5.96355e+06	1.10641e+07	6.21068e+06	1.03773e+08	1.00114e+08	7.47529e+06	8.71031e+07	8.69062e+07	7.68845e+07	75675050		22.0104	25.3571	25.9384	25.754	25.3051	22.5077	23.3994	22.5663	26.6289	26.5771	22.8337	26.3762	26.373	26.1962	26.1733		1.41162	0.257443	0.0965831	1.83384	2.41483	1.76947	2.02674	1.35149	1.35867	1.82534
Q0VCX2;P11021;F1N614;P20029;P46587	Q0VCX2;P11021;F1N614;P20029	78 kDa glucose-regulated protein	HSPA5;Hspa5	37	37	323.31	862	179130000	318340000	261460000	393990000	350810000	1.74416e+08	3.71828e+08	3.43552e+08	5.92446e+08	5.19085e+08	2.34323e+08	6.03068e+08	5.3999e+08	6.70144e+08	6.24473e+08		27.4164	28.246	27.962	28.5536	28.3861	27.378	28.4701	28.356	29.1421	28.9514	27.8039	29.1677	29.0084	29.3199	29.2181		0.973686	1.16802	1.31397	1.50371	1.47967	1.30812	1.89442	2.06529	1.70092	1.78009
Q58DQ3;G3N2R1;Q02878;P21533	Q58DQ3;G3N2R1;Q02878	60S ribosomal protein L6	RPL6	7	7	13.003	37	15097000		1013700	1404300	3656800	5.27377e+06	2.0741e+06	1.75084e+06	2.07888e+06	2.48102e+06	1.7837e+07		6.64007e+06	5.17442e+06	5.27616e+06		23.8478	17.8235	19.9512	20.4214	21.8022	22.3304	20.9841	20.7396	20.9874	21.2425	24.0884	19.1702	22.6628	22.303	22.3311		0.349326		1.72718	1.48037	0.678469	1.18149		6.55033	3.68469	1.44283
Q01469;P55052;G3N269;A8MUU1	Q01469	Fatty acid-binding protein, epidermal	FABP5	3	3	5.5265	7	4519200		4995600	2731100		3.50718e+06				8.23055e+06	8.77192e+06	9.15669e+06	7.33262e+06				22.1076	18.3713	22.2522	21.3811	17.3688	21.7419	17.4497	18.1741	18.7888	22.9726	23.0645	23.1264	22.8059	19.3873	18.1969		0.776062					1.94103		1.46782
Q56K14;P05386;E1BCL5	Q56K14;P05386;E1BCL5	60S acidic ribosomal protein P1	RPLP1	2	2	21.659	45		5741500	6295500	10320000	18367000		9.78918e+06	9.53055e+06	2.18236e+07	2.15617e+07		4.88892e+07	4.02631e+07	4.06537e+07	3.08464e+07		18.1085	22.453	22.5859	23.2989	24.1306	19.1102	23.2228	23.1841	24.3794	24.362	20.2282	25.543	25.263	25.2769	24.8786			1.70499	1.51387	2.11469	1.17393		8.51506	6.39554	3.93931	1.67944
Q08554	Q08554	Desmocollin-1	DSC1	4	4	13.425	17	11928000	9618300	7107300	1731200	1052700	2.82727e+06	1.81441e+06		1.46987e+07	1.04305e+07	1.13508e+07	8.7435e+06	7.64604e+06	3.38694e+06	2.52952e+06		23.5078	23.1973	22.7609	20.7233	20.0057	21.431	20.7911	16.1575	23.8092	23.3143	23.4363	23.0598	22.8663	21.6916	21.2704		0.237028	0.188642		8.49044	9.9083	0.951613	0.909048	1.0758	1.95641	2.40289
F1N2T0;O14979	F1N2T0;O14979	Heterogeneous nuclear ribonucleoprotein D-like	HNRNPDL	3	3	6.5586	41		13107000		6894700	5624200		1.38326e+07	1.29417e+07	1.35173e+07	2.49815e+07	5.72834e+06	3.89052e+07	3.48556e+07	1.05062e+07	1.57871e+07		18.6303	23.6438	17.2653	22.7171	22.4232	18.6967	23.7216	23.6255	23.6883	24.5744	22.4497	25.2135	25.0549	23.3247	23.9122			1.05536		1.96053	4.44179		2.96827		1.52381	2.807
Q3ZCH0;P38646;Q0BW82	Q3ZCH0;P38646	Stress-70 protein, mitochondrial	HSPA9	25	25	219.11	423	221390000	154710000	149040000	239670000	242980000	9.2702e+07	1.96571e+08	2.29531e+08	1.945e+08	1.50189e+08	6.65335e+07	3.08516e+08	2.85797e+08	3.25129e+08	3.36148e+08		27.722	27.205	27.1511	27.8365	27.8563	26.4661	27.5505	27.7741	27.5352	27.1622	25.9876	28.2008	28.0904	28.2764	28.3245		0.418727	1.27058	1.54006	0.811531	0.618112	0.300526	1.99415	1.91758	1.35657	1.38344
E1BDF0	E1BDF0	Uncharacterized protein	NEXN	35	22	323.31	748	58836000	296960000	310690000	267320000	212050000	1.46096e+08	6.30236e+07	6.50946e+07	6.45871e+08	6.8466e+08	2.50435e+08	3.24481e+08	3.40484e+08	3.34059e+08	3.43522e+08		25.8102	28.1457	28.2109	27.994	27.6598	27.1223	25.9094	25.956	29.2667	29.3508	27.8999	28.2736	28.343	28.3155	28.3558		2.48311	0.212229	0.209516	2.4161	3.22877	4.2565	1.09268	1.0959	1.24966	1.62
F1N169;E1BE25	F1N169	Uncharacterized protein	FLNA	21	5	34.036	110	23676000	23564000	12312000	22598000	24541000	1.76234e+07	1.56199e+07	1.09336e+07	4.33212e+07	4.30358e+07	2.62829e+07	3.36677e+07	2.41501e+07	3.48483e+07	2.84222e+07		24.4969	24.4901	23.5536	24.4297	24.5487	24.071	23.8969	23.3823	25.3686	25.359	24.6476	25.0049	24.5255	25.0546	24.7605		0.744357	0.66287	0.888046	1.91704	1.75363	1.11011	1.42878	1.96151	1.5421	1.15815
Q3B7M5;Q14847	Q3B7M5;Q14847	LIM and SH3 domain protein 1	LASP1	2	2	2.7785	5	1464800		1276500			1.37597e+06	1.19082e+06	703724		1.67117e+06	3.38452e+06	3.09439e+06	5.32456e+06				20.4823	19.181	20.2838	18.4231	18.1678	20.392	20.1835	19.4247	19.5404	20.6724	21.6905	21.5612	22.3442	18.6628	19.3971		0.939359		0.551292			2.31056		4.17122
Q3ZBT1;G3X757;Q01853;P55072;Q7ZU99	Q3ZBT1;G3X757;Q01853;P55072;Q7ZU99	Transitional endoplasmic reticulum ATPase	Vcp;VCP;vcp	56	55	323.31	1089	318110000	61947000	92761000	311870000	335790000	2.95751e+08	6.18601e+07	5.60909e+07	7.00788e+08	5.64137e+08	9.85668e+08	3.32435e+08	2.6234e+08	2.4223e+08	2.81832e+08		28.245	25.8845	26.467	28.2164	28.323	28.1398	25.8825	25.7413	29.3844	29.0715	29.8765	28.3085	27.9669	27.8518	28.0703		0.929712	0.998597	0.604682	2.24705	1.68003	3.09851	5.36644	2.82813	0.776702	0.83931
F1MTV9;P06748;Q3T160;E1BCL3;F1ML96	F1MTV9;P06748;Q3T160	Nucleophosmin	NPM1	7	7	30.269	54	7268300	659070	6849200	977670	3314300	1.35035e+06	3.13663e+06	2.09927e+06	1.30606e+07	1.84445e+07	3.14529e+06	5.17309e+06	1.48655e+07	1.06974e+07	1.11779e+07		22.7932	19.3301	22.7075	19.899	21.6603	20.3649	21.5808	21.0015	23.6387	24.1367	21.5848	22.3026	23.8255	23.3508	23.4141		0.185786	4.75917	0.306498	13.3589	5.56513	0.432741	7.84907	2.17039	10.9418	3.37261
P09867;A5A6H4;P09651;M5FMW1;Q32P51;G5E5V7;F1MH29;F1MW51;F1MTY3;G3MYU0;E1BK61	P09867;A5A6H4;P09651	Heterogeneous nuclear ribonucleoprotein A1;Heterogeneous nuclear ribonucleoprotein A1, N-terminally processed	HNRNPA1	13	13	68.826	127	44301000	18958000	5968700	22424000	24219000	2.06991e+07	1.92244e+07	2.08801e+07	7.1035e+07	4.98662e+07	2.58029e+07	8.2553e+07	8.99959e+07	3.52195e+07	2.40769e+07		25.4008	24.1763	22.509	24.4185	24.5296	24.3031	24.1964	24.3156	26.082	25.5716	24.621	26.2988	26.4234	25.0699	24.5211		0.467237	1.01405	3.49826	3.16781	2.05897	0.582445	4.35452	15.078	1.57062	0.994131
Q3T035;O15145	Q3T035;O15145	Actin-related protein 2/3 complex subunit 3	ARPC3	2	2	4.9013	13				4953200	5490300		882283	675695	9.99505e+06	6.91064e+06		5.07548e+06	4.11984e+06	3.92259e+06	4.28667e+06		18.3365	18.1142	17.3836	22.2399	22.3885	18.7937	19.7509	19.366	23.2528	22.7204	20.0043	22.2751	21.9742	21.9034	22.0314					2.0179	1.2587				0.79193	0.780772
P04973;P09496	P04973;P09496	Clathrin light chain A	CLTA	2	2	2.5862	10	1689500				153150	4.5547e+06	396354	121518		899643	1.19719e+07			869491	843562		20.6882	18.6812	19.3827	18.2626	17.2246	22.1189	18.5964	16.8908	19.9056	19.779	23.5131	18.7991	20.5885	19.7298	19.6861		2.69589				5.87426	7.08606				5.50808
Q3MHM7;Q98TF7;P42766;E1BFM3	Q3MHM7;Q98TF7;P42766	60S ribosomal protein L35	RPL35	3	3	5.3755	7	4488500				4257800	3.41745e+06	4.29506e+06	6.22769e+06		1.94021e+06	7.83097e+06		9.42919e+06	6.75606e+06	5.90296e+06		22.0978	17.6978	17.5319	17.5401	22.0217	21.7045	22.0342	22.5703	19.1835	20.8878	22.9008	19.1385	23.1687	22.6877	22.493		0.76138				0.455685	1.74467				1.38639
Q3T0D0;P61979;P61978	Q3T0D0;P61979;P61978	Heterogeneous nuclear ribonucleoprotein K	Hnrnpk;HNRNPK	11	11	94.113	219	1784600	23437000	7572700	26727000	37678000	6.54755e+06	1.35495e+07	1.58136e+07	4.25829e+07	4.22688e+07	3.66426e+06	1.15926e+08	4.01036e+07	4.95335e+07	4.8094e+07		20.7672	24.4823	22.8524	24.6718	25.1672	22.6425	23.6917	23.9147	25.3438	25.3331	21.8051	26.7886	25.2572	25.5619	25.5194		3.66892	0.578124	2.08823	1.59326	1.12184	2.05327	4.94628	5.29581	1.85331	1.27645
F1MLU7;Q86UP2	F1MLU7;Q86UP2	Kinectin	KTN1	2	2	2.4963	4							2.36917e+06					4.06137e+06					19.4459	17.921	18.8067	18.7744	18.3982	18.6064	21.1759	18.3573	19.3469	18.9312	19.901	21.9535	18.9155	19.3349	19.2673
P02465;P08123	P02465;P08123	Collagen alpha-2(I) chain	COL1A2	24	19	124.45	212	110460000	7165000	10419000	9410400	15440000	7.72173e+07	2.11444e+06		1.64147e+08	1.62411e+08	3.14706e+08	3.60282e+07	2.92421e+07	3.17917e+07	3.71458e+07		26.7189	22.7725	23.3127	23.1658	23.8802	26.2024	21.0118	19.0487	27.2904	27.2751	28.2294	25.1026	24.8015	24.9221	25.1467		0.699052	0.295107		17.4431	10.5188	2.84905	5.02836	2.80662	3.37836	2.40582
P35466;P26447	P35466;P26447	Protein S100-A4	S100A4	3	3	4.7278	54	5116600	1748400	2067300	2762200	2127200	2.11902e+06	3.04629e+06	2.97391e+06	3.9355e+06	2.8891e+06	1.17539e+07		3.03389e+06	4.14851e+06	4.10383e+06		22.2868	20.7376	20.9793	21.3974	21.0205	21.015	21.5386	21.5039	21.9081	21.4622	23.4866	20.389	21.5327	21.9842	21.9685		0.414147	1.74233	1.43855	1.42477	1.35817	2.29722		1.46756	1.50189	1.92922
Q2KJH6;P50454	Q2KJH6;P50454	Serpin H1	SERPINH1	2	2	7.404	32	2092400		1929200	3944100	5207600	1.03109e+06	2.67221e+06	480719	5.1008e+06	5.20909e+06	1.40147e+07			5.34005e+06	9.81153e+06		20.9967	19.0576	20.8796	21.9113	22.3122	19.9757	21.3496	18.8748	22.2823	22.3126	23.7404	19.5996	19.9004	22.3484	23.226		0.492777		0.249181	1.29327	1.00029	6.69792			1.35393	1.88408
A5D989	A5D989	Elongation factor 1-delta	EEF1D	1	1	2.8808	7					1960900			1.58045e+06	2.4753e+06			3.72104e+06			4.46966e+06		17.5673	19.265	18.4303	19.638	20.9031	18.8258	18.4905	20.5919	21.2392	19.002	18.541	21.8273	19.7334	19.2291	22.0917											2.27939
P42899;P05387;F1MH76	P42899;P05387	60S acidic ribosomal protein P2	RPLP2	5	5	46.897	98	113410000	6980100	5528400	10259000	14484000	5.26991e+07	1.67426e+07	1.37077e+07	2.23183e+07	2.99335e+07	1.59623e+08	1.98169e+07	3.26752e+07	1.69833e+07	2.45894e+07		26.757	22.7348	22.3984	23.2904	23.788	25.6513	23.997	23.7085	24.4117	24.8353	27.2501	24.2402	24.9617	24.0176	24.5515		0.464677	2.39863	2.47951	2.17549	2.06666	1.40749	2.83905	5.91042	1.65546	1.69769
Q7SIB2;G1K238;P02462	Q7SIB2;G1K238;P02462	Collagen alpha-1(IV) chain;Arresten	COL4A1	2	1	32.094	38	3936700				2023700	5.10592e+06			7.32262e+06	6.60812e+06	1.28487e+07	2.464e+06		1.48795e+06	2.21636e+06		21.9086	17.4673	17.6686	19.3521	20.9486	22.2837	17.1764	15.8724	22.8039	22.6558	23.6151	21.2326	19.9744	20.5049	21.0798		1.29701				3.26537	3.26383				1.0952
F1N2Y2;P05997	F1N2Y2;P05997	Collagen alpha-2(V) chain	COL5A2	20	20	65.41	116	17810000	27971000	3269100	35311000	33065000	3.26043e+07	1.93625e+06	4.48639e+06	1.44787e+08	1.1042e+08	2.64344e+07	4.90444e+07	4.96159e+07	2.85195e+07	4.14141e+07		24.0862	24.7374	21.6405	25.0736	24.9788	24.9586	20.8848	22.0971	27.1094	26.7184	24.6559	25.5476	25.5643	24.7654	25.3036		1.83067	0.0692234	1.37236	4.10035	3.33949	1.48424	1.7534	15.1772	0.807666	1.2525
Q9BGI3;P32119	Q9BGI3;P32119	Peroxiredoxin-2	PRDX2	1	1	2.2648	18	1055500					606063			3.89761e+06	2.37938e+06	3.37291e+06	7.43403e+06			4.93579e+06		20.0095	18.5715	17.9688	18.4378	18.3808	19.2091	19.2428	19.313	21.8942	21.1822	21.6856	22.8257	19.0154	18.4614	22.2348		0.574195					3.19556
Q96Q89	Q96Q89	Kinesin-like protein KIF20B	KIF20B	1	1	8.6838	43	2544900	10716000	9754700	6565900	6987500	6.46749e+06	2.91136e+06	2.89862e+06	2.80594e+07	3.07787e+07	5.89477e+06	1.71985e+07	1.28633e+07	1.70352e+07	1.21195e+07		21.2792	23.3533	23.2177	22.6466	22.7363	22.6248	21.4733	21.4669	24.742	24.8754	22.491	24.0358	23.6168	24.022	23.5308		2.54135	0.271684	0.297151	4.27351	4.40482	2.31631	1.60494	1.31868	2.5945	1.73446
Q2KII4;Q15369;P83941;P83940	Q2KII4;Q15369;P83941;P83940	Transcription elongation factor B polypeptide 1	TCEB1;Tceb1	5	5	7.4896	97	8141600			13914000	10077000	7.41803e+06	1.62773e+07	1.58004e+07	1.4487e+07	1.18686e+07	6.40135e+06	1.7813e+07	2.51392e+07	1.40696e+07	1.89518e+07		22.9569	16.5137	16.374	23.73	23.2646	22.8226	23.9564	23.9135	23.7883	23.5006	22.6099	24.0864	24.5834	23.7461	24.1758		0.911127			1.04118	1.17779	0.786252			1.01119	1.8807
Q3T0U2;G8JKV5;P50914	Q3T0U2;G8JKV5;P50914	60S ribosomal protein L14	RPL14	4	4	4.8778	10	11842000	1960600	3053800	2523800	4864900	1.02035e+07	5.37688e+06	7.26105e+06	1.02583e+07		1.37606e+07		1.28556e+07	1.6421e+07	2.02e+07		23.4974	20.9029	21.5422	21.2672	22.214	23.2826	22.3583	22.7917	23.2903	19.7998	23.714	19.3618	23.6159	23.969	24.2679		0.861639	2.74247	2.37771	4.06464		1.16201		4.20969	6.50644	4.1522
F1MM57	F1MM57	Uncharacterized protein	MYH14	17	0	252.82	156		749550000	486430000	102670000	124080000	4.66599e+07	3.18635e+08	2.3872e+08	3.03193e+08	2.00444e+08	2.1707e+08	2.16216e+08	3.12649e+08	2.04889e+08	2.06355e+08		18.7281	29.4814	28.8577	26.6134	26.8867	25.4757	28.2473	27.8307	28.1757	27.5786	27.6936	27.6879	28.22	27.6103	27.6206			0.425102	0.490759	2.95309	1.61544		0.288461	0.642741	1.99561	1.66308
Q5E973;Q07020	Q5E973;Q07020	60S ribosomal protein L18	RPL18	4	4	13.586	52	32550000	24963000	36148000	15228000	10326000	1.6584e+07	5.71186e+07	5.62446e+07	2.04393e+07	1.43898e+07	3.63436e+07	6.76024e+07	2.12719e+07	3.29392e+07	2.56332e+07		24.9562	24.5733	25.1074	23.8602	23.2998	23.9833	25.7675	25.7452	24.2848	23.7785	25.1152	26.0106	24.3424	24.9733	24.6115		0.509493	2.28813	1.55595	1.34222	1.39355	1.11655	2.7081	0.588467	2.16307	2.4824
G3N0V0	G3N0V0	Uncharacterized protein		2	2	5.9967	57	13597000	15864000	10551000	5533500	10039000	1.68982e+07	1.25842e+07	1.07807e+07	5.81117e+06	6.08574e+06	1.84094e+07	5.64519e+06	1.20452e+07	1.23817e+07	1.15759e+07		23.6968	23.9193	23.3309	22.3998	23.2591	24.0104	23.5851	23.362	22.4704	22.537	24.1339	22.4286	23.522	23.5617	23.4646		1.24279	0.793255	1.02177	1.05018	0.60621	1.35393	0.355849	1.14161	2.23759	1.15309
P62326;P62328;G8JL04;G3MWM4;G8JKY5;G8JKW3;E1B9F3	P62326;P62328;G8JL04;G3MWM4;G8JKY5	Thymosin beta-4;Hematopoietic system regulatory peptide	TMSB4X	7	7	40.788	24	12926000				717600	4.69451e+06			674852		1.25619e+08		1.02097e+06	601135	718501		23.6238	18.3044	18.125	19.2392	19.4528	22.1625	17.4478	18.5358	19.3642	20.2544	26.9045	17.3701	19.9615	19.1973	19.4546		0.363184					9.71832				1.00126
Q0IIK5;Q92499	Q0IIK5;Q92499	ATP-dependent RNA helicase DDX1	DDX1	6	6	11.379	50	3660100		8459300	34357000	28840000	4.72778e+06	1.41432e+07	1.15263e+07	1.92695e+07	1.50438e+07	5.86644e+06	1.36578e+07	1.37558e+07	2.17952e+07	2.36084e+07		21.8035	18.6166	23.0121	25.0341	24.7816	22.1727	23.7536	23.4584	24.1998	23.8427	22.4841	23.7032	23.7135	24.3775	24.4928		1.29171		1.36255	0.560862	0.521631	1.60281		1.62611	0.634375	0.818598
Q4L3K1;B9E8Q7	Q4L3K1;B9E8Q7	50S ribosomal protein L7/L12	rplL SH2467	4	4	40.47	18	19018000	5648900	16071000		1290400	4.1519e+06	1.62153e+07	9.13355e+06			3.8122e+07	1.17458e+07	1.707e+07				24.1809	22.4295	23.938	18.7287	20.2994	21.9853	23.9509	23.1227	18.6838	19.7359	25.1841	23.4856	24.025	19.5252	19.3275		0.218314	2.87053	0.568325			2.00452	2.0793	1.06216
Q32PB0;F1N1S0	Q32PB0;F1N1S0	Single-stranded DNA-binding protein...	SSBP1	2	2	4.851	12	705310		1440300	2548900	1829900	673551			1.98837e+06	2.44267e+06	2.2913e+06				2.04044e+06		19.4279	19.0594	20.4579	21.2814	20.8033	19.3614	18.1487	18.5183	20.9232	21.22	21.1277	19.9442	19.2508	18.8474	20.9604		0.954972			0.780089	1.33487	3.24864				1.11506
Q62095;Q1DJF0;P0CQ75;P0CQ74;A6R3L3;Q5W5U4;F1MYC6;P09052;Q9NQI0	Q62095	ATP-dependent RNA helicase DDX3Y	Ddx3y	5	1	3.7194	10				735010	1041200			280179	1.64644e+06	1.1086e+06							18.2481	18.4143	18.2555	19.4874	19.9898	18.2801	19.0671	18.096	20.6509	20.0803	20.1295	19.2396	19.6548	20.2154	18.4232					2.24002	1.06473
A5PKL2;P62070	A5PKL2;P62070	Ras-related protein R-Ras2	RRAS2	1	1	2.1743	5		359790	1014700		976830	716645	411554	867818	984308	1.69133e+06			1.32746e+06	915972	1.08656e+06		18.9917	18.4568	19.9526	19.5321	19.8977	19.4509	18.6507	19.727	19.9088	20.6897	20.3385	18.93	20.3402	19.8049	20.0513			1.14387	0.855246		1.73145			1.30823		1.11234
Q4L5W1	Q4L5W1	Ribosome-recycling factor	frr SH1655	3	3	3.5679	64	2420600000	780220000	1167500000	65692000	147860000	6.74286e+08	6.87764e+08	7.87366e+08	1.18207e+08	1.14767e+08	2.50789e+09	5.58195e+08	6.24184e+08	1.96964e+08	1.42644e+08		31.1727	29.5393	30.1208	25.9692	27.1397	29.3288	29.3573	29.5525	26.8167	26.7741	31.2238	29.0562	29.2174	27.5534	27.0878		0.278561	0.8815	0.674403	1.79941	0.776188	1.03606	0.715433	0.534633	2.99829	0.964722
Q0IIJ2;P07305	Q0IIJ2;P07305	Histone H1.0;Histone H1.0, N-terminally processed	H1F0	3	3	3.106	3						2.30515e+06									559592		19.7546	18.4109	17.939	17.7146	17.9337	21.1364	17.937	17.9913	18.4338	18.5049	17.4318	20.4777	19.7499	19.0885	19.094
Q3ZC13;Q96CW1;Q6NWK2	Q3ZC13;Q96CW1;Q6NWK2	AP-2 complex subunit mu;AP-2 complex subunit mu-A	AP2M1;ap2m1a	2	2	3.0963	7						1.50486e+06									2.06654e+06		18.5998	18.8102	18.3565	19.4186	19.2849	20.5212	17.8472	18.5597	20.1001	18.0817	18.6055	19.7254	18.419	18.988	20.9788
G3X6B1	G3X6B1	Uncharacterized protein		15	1	19.267	12				5415700	8828400				3.31113e+07	2.1947e+07		1.06486e+07	7.59705e+06		9.65589e+06		18.4982	18.6274	18.1663	22.3687	23.0737	18.2435	17.4426	17.5043	24.9808	24.3875	19.4053	23.3442	22.857	18.0974	23.203					6.11395	2.48596					1.09373
A4FUA8;P52907	A4FUA8;P52907	F-actin-capping protein subunit alpha-1	CAPZA1	16	13	84.642	157		66281000	59451000	295240000	300670000	3.91192e+07	3.12716e+07	4.54203e+07	1.96736e+08	1.61431e+08	5.72598e+07	1.04082e+08	9.78493e+07	8.95859e+07	7.85394e+07		19.4167	25.9821	25.8252	28.1373	28.1636	25.2214	24.8983	25.4368	27.5517	27.2663	25.771	26.6332	26.5441	26.4168	26.2269			0.471803	0.763996	0.666359	0.536905		1.57032	1.64588	0.303434	0.261215
Q3ZBL0;G5E6E7;P62308;A8MWD9	Q3ZBL0;G5E6E7;P62308;A8MWD9	Small nuclear ribonucleoprotein G;Putative small nuclear ribonucleoprotein G-like protein 15	SNRPG;SNRPGP15	1	1	2.2457	28			3071700	4589500	5985800		4.14288e+06	1.18419e+07	7.51582e+06	7.65753e+06		1.40733e+07	1.12082e+07	9.10754e+06	1.01387e+07		19.1672	17.5958	21.5506	22.1299	22.5131	18.6254	21.9822	23.4974	22.8415	22.8684	18.805	23.7465	23.4181	23.1186	23.2734				3.85516	1.63761	1.27928			3.64887	1.98443	1.69379
F1N6W9;P39060	F1N6W9	Uncharacterized protein	COL18A1	10	10	58.213	63	26985000			17858000	20341000	7.85913e+06		4.26249e+06	4.91722e+07	4.6962e+07	6.14658e+07	7.63198e+07	1.64226e+07		6.79183e+06		24.6857	18.5258	18.6196	24.0901	24.2779	22.9059	17.681	22.0233	25.5513	25.485	25.8733	26.1856	23.9692	18.6252	22.6954		0.291241			2.75351	2.30874	2.27778				0.333898
P61157;P61158;F1N049;F1N6J8;Q9C0K3;Q9P1U1	P61157;P61158;F1N049	Actin-related protein 3	ACTR3	9	9	22.135	31	3585100	3649300		11085000	16250000	1.68799e+07		2.41531e+06	1.24788e+07	1.08209e+07	6.98858e+06	1.1623e+07		1.18054e+07	1.00392e+07		21.7736	21.7992	18.2291	23.4021	23.9539	24.0088	18.3152	21.2038	23.573	23.3673	22.7366	23.4705	19.7644	23.4929	23.2591		4.70834			1.12574	0.665899	1.94934	3.18501		1.06499	0.617795
Q8ILR9	Q8ILR9	Protein PF14_0175	PF14_0175	2	2	2.2663	2						811738	483779	156089		2.56145e+06	2.66882e+06		541030				20.1589	18.565	18.523	17.5779	17.7729	19.6307	18.884	17.252	19.7915	21.2885	21.3478	18.9732	19.0453	19.4106	19.3025
Q861S4;F1MUN0;G5E6D6;F1N7U3;F1MSB9;P46778	Q861S4;F1MUN0;G5E6D6;F1N7U3;F1MSB9;P46778	60S ribosomal protein L21	RPL21	2	2	5.4809	15	9272600					8.52628e+06		678399			1.01728e+07						23.1445	20.0038	18.1641	17.0304	18.9805	23.0235	17.7841	19.3718	18.2781	19.188	23.2782	19.0573	20.5731	18.5627	18.1987		0.919513					1.09708
Q58CQ2	Q58CQ2	Actin-related protein 2/3 complex s...	ARPC1B	5	2	22.046	66	742710	4381300	2211200	48496000	41725000	7.63433e+06		1.02078e+06	2.19944e+07	1.85117e+07		1.11203e+07	6.96203e+06	1.35513e+07	1.01379e+07		19.5024	22.0629	21.0764	25.5314	25.3144	22.8641	17.879	19.9612	24.3906	24.1419	18.5483	23.4067	22.7311	23.6919	23.2733		10.279		0.461643	0.45353	0.44366		2.53813	3.14853	0.279432	0.24297
Q1LZD9;Q8WXF1	Q1LZD9;Q8WXF1	Paraspeckle component 1	PSPC1	2	2	4.8159	16		4058900	4162400	5526100	4358100		3.60653e+06	3.3936e+06	5.11553e+06	3.71884e+06		6.99727e+06	3.71604e+06	4.88188e+06	8.38076e+06		19.3287	21.9527	21.989	22.3978	22.0553	19.8083	21.7822	21.6944	22.2865	21.8264	18.8682	22.7384	21.8253	22.219	22.9986			0.888549	0.815299	0.925703	0.853316		1.72393	0.892764	0.883422	1.92303
P68103;E1B9F6;Q5VTE0;P68104;P62630;P10126;E1BED8;G3N0P6;Q32PH8;Q05639;P62631;E1BPF4;P0CN31;P0CN30;G3N2F0;E1B7J1	P68103;E1B9F6;Q5VTE0;P68104;P62630;P10126;E1BED8;G3N0P6;Q32PH8;Q05639;P62631;E1BPF4	Putative elongation factor 1-alpha-like 3;Elongation factor 1-alpha 1;Elongation factor 1-alpha 2	EEF1A1P5;EEF1A1;Eef1a1;EEF1A2;Eef1a2	8	5	14.71	37	15756000			27668000	17137000	2.34876e+07	6.09745e+06		3.04568e+07	2.81854e+07	3.04988e+07	2.3554e+07	2.45212e+07	4.59194e+07			23.9094	18.5935	15.3584	24.7217	24.0306	24.4854	22.5398	17.9495	24.8603	24.7484	24.8622	24.4895	24.5475	25.4526	17.9344		1.49071			1.10079	1.64471	1.93569			1.65966
B8Y9S9;P07589;G5E5A9;B8Y9T0;P11276	B8Y9S9;P07589;G5E5A9;B8Y9T0	Embryo-specific fibronectin 1 trans...	FN1	109	54	323.31	2597	6258400000	1901900000	1952200000	2229300000	2221700000	5.03582e+09	5.70222e+08	5.20765e+08	6.63346e+09	6.73173e+09	1.50963e+10	2.17375e+09	1.79615e+09	1.71843e+09	1.7584e+09		32.5431	30.8248	30.8625	31.0539	31.049	32.2296	29.0869	28.9561	32.6271	32.6483	33.8135	31.0175	30.7423	30.6784	30.7116		0.80465	0.299817	0.266758	2.97558	3.02999	2.41217	1.14294	0.920065	0.770839	0.791468
E1BQ37;P23246	E1BQ37;P23246	Splicing factor, proline- and glutamine-rich	SFPQ	30	28	253.5	437		104860000	139290000	149990000	193710000		2.79997e+08	2.80122e+08	2.29093e+08	3.11008e+08		3.07887e+08	4.19407e+08	3.53086e+08	3.56885e+08		18.7992	26.6439	27.0535	27.1603	27.5293	19.0225	28.0608	28.0615	27.7714	28.2124	20.6335	28.1978	28.6438	28.3954	28.4109			2.6702	2.01107	1.52739	1.60553		2.93617	3.01103	2.35407	1.84236
Q5E9A3;Q15365;Q3SYT9;Q17QV0;Q15366;P57721	Q5E9A3;Q15365;Q3SYT9;Q17QV0;Q15366;P57721	Poly(rC)-binding protein 1;Poly(rC)-binding protein 2;Poly(rC)-binding protein 3	PCBP1;PCBP2;PCBP3	2	2	2.1706	6		3482500		2752100	2480000		2.8919e+06	3.60048e+06	4.48684e+06	3.61794e+06			3.84984e+06	8.392e+06	6.28246e+06		19.7996	21.7317	18.8608	21.3921	21.2419	16.4636	21.4636	21.7798	22.0973	21.7867	19.5509	18.4209	21.8764	23.0006	22.5829			0.830408		1.63033	1.45884				3.04931	2.53325
Q2KJ42;G3N361;Q15233	Q2KJ42;G3N361;Q15233	Non-POU domain-containing octamer-binding protein	NONO	25	23	92.329	317		69664000	58990000	161390000	110690000		1.4997e+08	1.47393e+08	1.43755e+08	1.26615e+08		1.43194e+08	1.75284e+08	2.30577e+08	2.02283e+08		18.1513	26.0539	25.814	27.266	26.722	17.2472	27.1601	27.1351	27.099	26.9159	19.0733	27.0934	27.3851	27.7807	27.5918			2.15276	2.4986	0.890729	1.14387		2.05549	2.97142	1.4287	1.82748
E1BKX3	E1BKX3	Uncharacterized protein	MYBBP1A	3	3	5.915	4	1131700				1163800	2.0731e+06					3.4213e+06						20.1101	17.7816	17.6138	17.8469	20.1504	20.9834	18.6404	18.8221	18.9293	19.3647	21.7061	19.5031	18.985	18.8698	18.5728		1.83184					3.02315
E1BF59	E1BF59	Uncharacterized protein	PLEC	129	59	323.31	841	127640000	100070000	120160000	154940000	151640000	2.01112e+08	8.28656e+07	7.19308e+07	2.4965e+08	2.40916e+08	1.49045e+08	1.1715e+08	1.44533e+08	1.95457e+08	2.05616e+08		26.9275	26.5764	26.8404	27.2071	27.1761	27.5834	26.3043	26.1001	27.8953	27.844	27.1512	26.8038	27.1068	27.5423	27.6154		1.57562	0.828077	0.598625	1.61127	1.58874	1.1677	1.17068	1.20284	1.2615	1.35595
Q76LV1;G5E507;P11499;P08238;P40292;G3N2V5;P02829	Q76LV1;G5E507;P11499;P08238;P40292;G3N2V5;P02829	Heat shock protein HSP 90-beta;ATP-dependent molecular chaperone HSP82	Hsp90ab1;HSP90AB1;HSP82	2	1	4.0402	13	2899300			1525800	1835100	2.21958e+06			3.10163e+06	2.79918e+06	4.80037e+06				2.70183e+06		21.4673	19.0569	17.3064	20.5411	20.8074	21.0819	18.6169	18.4865	21.5646	21.4166	22.1947	19.1763	20.7453	18.7836	21.3655		0.765557			2.03279	1.52536	1.6557				1.47231
F1MK80	F1MK80	Uncharacterized protein	ADGRA3	1	1	6.0076	7		33869000					2.3958e+08	7.00699e+07	4.20744e+06			9.35896e+07	5.97127e+07	2.71857e+07	1.38599e+06		18.856	25.0135	18.2213	18.4143	18.5574	18.7769	27.8359	26.0623	22.0045	19.3803	19.1682	26.4798	25.8315	24.6963	20.4025			7.07373					2.76328
A6H769;P62081	A6H769;P62081	40S ribosomal protein S7	RPS7	3	3	5.2277	8				3760700			3.2743e+06	4.47808e+06		2.80067e+06			5.77049e+06	5.76192e+06	4.51353e+06		18.0831	19.5023	19.2964	21.8426	18.5021	18.955	21.6428	22.0944	18.6944	21.4173	18.2195	18.7411	22.4603	22.4581	22.1058										1.53214
Q4L6V7	Q4L6V7	Transcription elongation factor Gre...	greA SH1309	3	3	62.972	16	8370400	9944700	9644900				1.64533e+07	1.36173e+07			2.06289e+07	2.39546e+06	4.88179e+06				22.9969	23.2455	23.2013	17.9064	17.1076	17.8078	23.9719	23.6989	19.7071	19.2947	24.2982	21.1919	22.219	18.8878	19.3502			1.65448	1.41187			2.46451	0.240878	0.506153
A7E307;Q92841	A7E307;Q92841	Probable ATP-dependent RNA helicase DDX17	DDX17	4	4	5.3611	16				2721400	2196100		3.76499e+06	2.79924e+06	2.81222e+06	3.44908e+06			2.26024e+06	5.39386e+06	3.64981e+06		18.8271	17.8376	18.8078	21.3759	21.0665	16.1804	21.8442	21.4166	21.4233	21.7178	18.7766	19.6221	21.108	22.3629	21.7994					1.03337	1.57055				1.98202	1.66195
A5D7A0;Q96C19;Q17QM6;Q9BUP0	A5D7A0;Q96C19	EF-hand domain-containing protein D2	EFHD2	13	13	107.61	100		8545000	4619000	7620000	5869900	2.20334e+06		1.00492e+06	7.07955e+07	6.91232e+07		1.03994e+07	1.39037e+07	8.37239e+06	9.36144e+06		18.9949	23.0266	22.1391	22.8614	22.4849	21.0713	17.8466	19.9387	26.0772	26.0427	19.2027	23.31	23.729	22.9972	23.1583				0.217562	9.29075	11.7759		1.21701	3.0101	1.09874	1.59482
P22626	P22626	Heterogeneous nuclear ribonucleoproteins A2/B1	HNRNPA2B1	19	3	51.399	157	46730000	44966000	9046200	43025000	60505000	3.96993e+07	5.14587e+07	5.87771e+07	1.97561e+08	1.91564e+08	3.2289e+07	2.11307e+08	1.39803e+08	5.58138e+07	1.12356e+08		25.4778	25.4223	23.1089	25.3587	25.8506	25.2426	25.6169	25.8088	27.5577	27.5133	24.9445	27.6548	27.0588	25.7341	26.7435		0.849547	1.14439	6.49743	4.59176	3.16609	0.69097	4.69925	15.4543	1.29724	1.85696
G1K1B4;Q56K03;P46776;G3MWX5;E1BE42;P14115;P41092	G1K1B4;Q56K03;P46776;G3MWX5;E1BE42;P14115	60S ribosomal protein L27a	RPL27A;Rpl27a	4	4	24.36	82	13283000	45381000	30024000	28858000	28439000	8.08267e+06	4.59439e+07	6.20197e+07	1.6299e+07	1.60694e+07	1.08563e+07	4.81646e+07	2.37381e+07	2.15245e+07	2.807e+07		23.6631	25.4356	24.8396	24.7825	24.7614	22.9464	25.4534	25.8862	23.9583	23.9378	23.372	25.5215	24.5007	24.3595	24.7425		0.608497	1.0124	2.06567	0.564802	0.565048	0.817305	1.06134	0.790638	0.745878	0.987025
P02453	P02453	Collagen alpha-1(I) chain	COL1A1	11	5	36.028	66	23057000	50779000	36113000	28635000	21989000	5.18995e+06	1.1326e+06	745487	9.8849e+07	1.04459e+08	1.42492e+07	6.09235e+06	4.00386e+06	1.91324e+07	9.56691e+06		24.4587	25.5977	25.106	24.7713	24.3903	22.3073	20.1112	19.5078	26.5587	26.6384	23.7644	22.5386	21.933	24.1895	23.1896		0.225092	0.0223046	0.0206432	3.45204	4.75052	0.618	0.119978	0.11087	0.668147	0.435077
G3X7D5;Q3T199;E1BEQ3;P62266;Q8T3U2	G3X7D5;Q3T199;E1BEQ3;P62266	40S ribosomal protein S23	RPS23	3	3	5.0523	11			3400100	2612300			2.58337e+06	2.19675e+06	4.67984e+06	3.29978e+06		6.06996e+06		4.40475e+06	4.31827e+06		18.859	17.5463	21.6971	21.3169	17.3756	19.147	21.3008	21.0669	22.158	21.6539	19.911	22.5333	18.9628	22.0706	22.042				0.646085	1.79146					1.68616
G3MZI7;P20908	G3MZI7;P20908	Collagen alpha-1(V) chain	COL5A1	2	2	3.363	11					2496900	1.36621e+06			6.01144e+06	6.21866e+06	5.21212e+06		2.71712e+06				18.5995	21.5111	18.9267	17.4938	21.2517	20.3817	18.0942	18.4626	22.5193	22.5682	22.3134	20.9436	21.3736	18.6407	18.8794						2.49055
F1MER7	F1MER7	Uncharacterized protein	HSPG2	133	99	323.31	1860	837740000	582280000	400560000	698310000	575300000	6.99899e+08	1.25285e+08	7.90259e+07	2.76235e+09	2.54283e+09	1.94751e+09	4.05626e+08	4.57839e+08	3.79487e+08	3.76457e+08		29.6419	29.1171	28.5774	29.3793	29.0997	29.3826	26.9006	26.2358	31.3633	31.2438	30.859	28.5956	28.7703	28.4995	28.4879		0.83546	0.215162	0.197289	3.95577	4.42001	2.32472	0.696617	1.143	0.543437	0.654367
F1MPU0;P49951;Q00610;P53675	F1MPU0;P49951;Q00610	Clathrin heavy chain 1	CLTC	3	3	2.7524	4	1389300				552320	1.07759e+06					3.06542e+06						20.4059	18.7114	18.1904	17.8476	19.0751	20.0394	18.8837	19.5249	18.7283	19.9337	21.5477	20.0783	18.9473	16.8653	19.7047		0.775637					2.20645
F1MQ37;REV__Q9UKV3;F1MM07;F1MZX6;Q9BE39;F1N775;Q9BE40;E1BP87;Q9BE41;F1N2G0;F1MTZ2;F1MRC2;E1BPX8;P12883;P13535;Q9UKX3;Q9Y623;P13533;P12882;P11055;Q9UKX2;A7E2Y1	F1MQ37	Myosin-9	MYH9	325	91	323.31	11308	8704500000	27322000000	21145000000	24829000000	21835000000	2.00551e+10	1.33088e+10	1.21485e+10	4.8273e+10	4.55286e+10	2.49373e+10	1.99543e+10	1.99544e+10	2.52684e+10	2.4973e+10		33.0191	34.6693	34.2996	34.5313	34.3459	34.2233	33.6317	33.5001	35.4905	35.4061	34.5376	34.216	34.216	34.5566	34.5396		2.30399	0.48711	0.574532	1.94422	2.08512	2.86487	0.73034	0.943691	1.0177	1.14371
P00829;Q05825;P06576	P00829;Q05825;P06576	ATP synthase subunit beta, mitochondrial	ATPsyn-beta;ATP5B	2	2	6.8131	30				6183600	5418100	542790		3.04205e+06	9.00686e+06	7.40267e+06	1.69629e+06			6.62802e+06	4.09849e+06		18.8883	17.5741	19.6715	22.56	22.3694	19.05	17.1259	21.5366	23.1026	22.8196	20.694	18.829	18.8848	22.6601	21.9667					1.45657	1.36629				1.07187	0.756444
E1BKX7;O75369	E1BKX7;O75369	Filamin-B	FLNB	13	11	14.59	19	5285700			6246200	7751100	5.55988e+06	2.54374e+06	2.89689e+06	7.16339e+06	6.50908e+06	8.33853e+06	6.2037e+06		6.55671e+06	9.35924e+06		22.3337	19.3296	18.4077	22.5745	22.886	22.4066	21.2785	21.4661	22.7722	22.634	22.9914	22.5647	18.7762	22.6445	23.158		1.05187			1.14684	0.839762	1.57756			1.04971	1.20747
E1BJW3;Q9H8L6	E1BJW3	Uncharacterized protein	MMRN2	14	14	35.147	79	3831400	12085000	16664000	54615000	35164000	5.29186e+06	316432		7.97625e+07	1.05066e+08	1.03784e+07	2.00918e+06	3.13688e+06	5.24313e+06	3.21088e+06		21.8694	23.5267	23.9902	25.7028	25.0676	22.3353	18.2715	17.9081	26.2492	26.6467	23.3071	20.9382	21.5809	22.322	21.6145		1.38118	0.0261839		1.46045	2.98789	2.70878	0.166254	0.188243	0.0960017	0.0913115
E1BGX1;Q92804	E1BGX1;Q92804	TATA-binding protein-associated factor 2N	TAF15	5	4	9.0363	80		15829000		23026000	22316000	1.43553e+07	1.50793e+07	1.0355e+07	3.7692e+07	3.79125e+07	2.96607e+07	5.4435e+07	5.9041e+07	2.87788e+07			19.8172	23.9161	18.1986	24.4568	24.4116	23.7751	23.8461	23.3038	25.1678	25.1762	24.8221	25.698	25.8152	24.7785	18.6815			0.952635		1.63693	1.6989		3.43894		1.24984
E1BHY6	E1BHY6	Uncharacterized protein	GRN	5	5	13.721	28	36636000				653480	2.72052e+07	753486	222001	4.88973e+06	3.71474e+06	7.70447e+07		843379				25.1268	17.8064	18.0777	18.4015	19.3178	24.6974	19.5232	17.7602	22.2213	21.8248	26.1992	18.9667	19.6858	20.4217	18.7379		0.742582				5.68455	2.10298
O18739;P29279	O18739;P29279	Connective tissue growth factor	CTGF	6	6	16.457	24	4439100			5065100	2748400	4971720	2.59735e+06	2.6762e+06	1.62158e+07	2.01524e+07	1.02187e+07	1.83401e+07	7.09917e+06		4.33949e+06		22.0818	17.9194	19.0644	22.2722	21.3902	22.2453	21.3086	21.3518	23.9509	24.2644	23.2847	24.1285	22.7592	19.7735	22.0491		1.11998			3.20148	7.33241	2.30197				1.57892
Q3SX47;P07910;P0DMR1;O60812;B7ZW38;B2RXH8	Q3SX47;P07910;P0DMR1;O60812;B7ZW38;B2RXH8	Heterogeneous nuclear ribonucleoproteins C1/C2;Heterogeneous nuclear ribonucleoprotein C-like 4;Heterogeneous nuclear ribonucleoprotein C-like 1;Heterogeneous nuclear ribonucleoprotein C-like 3;Heterogeneous nuclear ribonucleoprotein C-like 2	HNRNPC;HNRNPCL4;HNRNPCL1;HNRNPCL3;HNRNPCL2	4	4	5.2739	24			3481700		5427100	1.97467e+06	3.85436e+06		1.50026e+07	1.23197e+07	1.75952e+06	1.04112e+07		7.31439e+06	9.5644e+06		19.6481	18.4378	21.7314	18.832	22.3717	20.9132	21.8781	19.3561	23.8387	23.5545	20.7467	23.3116	17.8745	22.8023	23.1892						2.27003					1.76234
Q3T0S7;Q9Y224	Q3T0S7;Q9Y224	UPF0568 protein C14orf166	C14orf166	4	4	16.9	75				17376000	20324000		4.79992e+06	1.20572e+07	1.84125e+07	1.83672e+07		1.15362e+07	9.71459e+06		1.06017e+07		19.5291	19.0026	17.8245	24.0506	24.2767	17.2981	22.1946	23.5234	24.1342	24.1306	19.9284	23.4597	23.2117	19.3617	23.3378					1.05965	0.903722					0.521633
Q5E9T9;Q9Y3I0;Q6NZS4	Q5E9T9;Q9Y3I0;Q6NZS4	tRNA-splicing ligase RtcB homolog	RTCB;rtcb	6	6	17.029	50				14384000	14191000		5.4927e+06	6.93597e+06	8.7414e+06	7.29228e+06		8.26531e+06		8.99344e+06	1.04124e+07		18.829	19.8858	17.8032	23.778	23.7585	18.0141	22.3891	22.7257	23.0594	22.7979	18.5686	22.9786	19.163	23.1004	23.3118					0.607717	0.513866				0.625239	0.733732
Q9TU47;P56537;Q6ZM19;O55135	Q9TU47;P56537;Q6ZM19;O55135	Eukaryotic translation initiation factor 6	EIF6;eif6;Eif6	4	4	6.5113	16	3571200			3234800	1671700	4.45192e+06	1.77433e+06		9.63378e+06	1.01842e+07	4.81158e+06			3.28111e+06	3.49401e+06		21.768	17.9753	17.5847	21.6252	20.6729	22.086	20.7588	17.6799	23.1997	23.2798	22.1981	20.0953	19.8047	21.6458	21.7365		1.24662			2.97817	6.0921	1.34733			1.01432	2.0901
F1MC13	F1MC13	Uncharacterized protein	LAMA5	11	9	20.166	46	32373000		2092000	6260000	5180000	4.37941e+06			2.43917e+07	2.11633e+07	1.12889e+07			2.82278e+06	2.06151e+06		24.9483	18.8193	20.9965	22.5777	22.3045	22.0623	17.3141	18.6579	24.5399	24.3351	23.4284	19.3829	19.4066	21.4287	20.9753		0.13528			3.89644	4.08557	0.348712			0.450923	0.397974
Q0VC27;P17096	Q0VC27;P17096	High mobility group protein HMG-I/HMG-Y	HMGA1	5	5	11.841	40			1964500	2033800	2919300	7.18424e+06			2.97931e+07	1.60616e+07		2.09618e+06	1.13203e+07	1.29235e+06	1.91247e+06		20.0239	17.8748	20.9057	20.9557	21.4772	22.7764	16.7647	18.1557	24.8285	23.9371	18.2707	20.9993	23.4324	20.3016	20.867					14.649	5.50186			5.76245	0.635435	0.655113
P62263;P14130;Q3T076;F1MR01	P62263;P14130;Q3T076	40S ribosomal protein S14	RPS14;RpS14a	6	6	7.0907	16	6990900	5723500	8867600	9472100	8795000	9.94924e+06	1.10119e+07	1.32433e+07	1.28628e+07	1.91266e+07		3.05531e+07	1.96612e+07	1.52508e+07	2.11417e+07		22.737	22.4485	23.0801	23.1753	23.0683	23.2462	23.3926	23.6588	23.6167	24.1891	19.1144	24.8648	24.2288	23.8624	24.3336		1.42317	1.92399	1.49345	1.35797	2.17471		5.33818	2.21719	1.61008	2.40383
F1MMK8;Q15046	F1MMK8	Lysine--tRNA ligase	KARS	3	3	2.7549	5							4.31232e+06	2.40841e+06		2.8904e+06		6.524e+06	3.56387e+06				19.194	17.0863	19.7425	18.6012	18.2237	18.3809	22.04	21.1996	19.3904	21.4628	19.0551	22.6373	21.765	18.5934	18.4505
A2VDN8;G3MWI5;Q9ULV4;Q6QEF8	A2VDN8;G3MWI5;Q9ULV4	Coronin-1C	CORO1C	9	9	21.552	41			11038000	31722000	29054000	2.93063e+06			1.61575e+07	8.69801e+06				1.06255e+07	2.13508e+06		19.0339	20.4354	23.396	24.919	24.7922	21.4828	18.0649	17.4667	23.9457	23.0523	19.4099	18.7629	18.639	23.341	21.0259					0.509346	0.299374				0.334956	0.0734867
A6H737;M0QVZ4	A6H737	Lysyl oxidase homolog 2	LOXL2	3	3	5.3661	19				5428400	7262000	3.13367e+06			1.01753e+07	9.06159e+06	7.28092e+06						18.2778	18.3467	19.1275	22.3721	22.7919	21.5794	17.7026	17.1378	23.2786	23.1113	22.7957	19.2575	19.5319	18.8407	19.6694					1.87446	1.24781
P39872;P39023;Q3SZ10;M5FKG6;Q92901	P39872;P39023	60S ribosomal protein L3	RPL3	8	8	8.5821	19	3987900		2208200	8071200	4992800	3.4133e+06	6.74271e+06	1.50385e+07		6.83096e+06	2.06171e+06	6.63338e+06		5.77408e+06	5.15447e+06		21.9272	19.0181	21.0744	22.9444	22.2514	21.7027	22.6849	23.8422	18.8012	22.7037	20.9754	22.6613	19.4289	22.4612	22.2974		0.855913		6.81028		1.36816	0.516992			0.715393	1.03238
F1MNT4;P07942	F1MNT4;P07942	Laminin subunit beta-1	LAMB1	17	17	40.83	92	20415000	4953600	4720900	31888000	25477000	1.06348e+07			7.29612e+07	8.16465e+07	3.22182e+07	2.04433e+06		1.6267e+06	4.30318e+06		24.2831	22.24	22.1706	24.9265	24.6027	23.3423	18.2137	17.5108	26.1206	26.2829	24.9414	20.9632	18.7396	20.6335	22.037		0.520929			2.28804	3.20471	1.57816	0.412696		0.0510129	0.168904
F6PW02;G3N1J1;G3N0F2;Q92734	F6PW02;G3N1J1;G3N0F2;Q92734	Protein TFG	TFG	4	4	15.08	61	32520000	34201000	19161000	23119000	18172000	1.59633e+07	3.25147e+07	1.75232e+07	3.54125e+07	2.01598e+07	4.34553e+07	4.33414e+07		4.08449e+07	3.30567e+07		24.9548	25.0275	24.1917	24.4626	24.1152	23.9283	24.9546	24.0628	25.0778	24.265	25.373	25.3692	18.5534	25.2837	24.9784		0.490875	0.950694	0.914526	1.53175	1.10939	1.33626	1.26726		1.76673	1.8191
Q3T0Q8;A6QLB4;Q9BVJ6	Q3T0Q8	U3 small nucleolar RNA-associated p...	UTP14A	3	3	4.4311	10	197460000	366700000	368430000	53713000		9.26875e+07	2.57851e+08	2.94292e+08	4.84084e+07	7.44344e+07	3.02273e+08	1.82144e+08	1.32965e+08	4.24948e+07	2.49447e+07		27.557	28.45	28.4568	25.6788	17.3982	26.4659	27.942	28.1327	25.5288	26.1495	28.1713	27.4405	26.9865	25.3408	24.5722		0.469399	0.703165	0.798774	0.901243		1.53081	0.496711	0.360895	0.791146
Q29RQ2;Q07666;Q60749;E1BP48;Q5VWX1	Q29RQ2;Q07666;Q60749	KH domain-containing, RNA-binding, signal transduction-associated protein 1	KHDRBS1;Khdrbs1	4	4	5.5195	47		2269700		11932000	24309000		4.77647e+06	1.49119e+06	2.72937e+07	2.02976e+07		2.22167e+06	2.36138e+06	9.20429e+06	7.73148e+06		19.6189	21.1141	18.9822	23.5083	24.535	18.3458	22.1875	20.508	24.7021	24.2748	18.869	21.0832	21.1712	23.1339	22.8823			2.10445		2.28744	0.834983		0.978837		0.771396	0.31805
Q76KA3;Q3SZQ6;P62910	Q76KA3;Q3SZQ6;P62910	60S ribosomal protein L32	RPL32	2	2	3.9851	11	6182600		1194800			1.25154e+07	2.28335e+06	2.26341e+06	838563		2.06073e+07						22.5598	19.8016	20.1883	17.6092	17.4836	23.5772	21.1227	21.1101	19.6776	18.6134	24.2967	19.9277	19.7101	18.6146	18.67		2.02429		1.89439			3.33311
E1B9I2;Q15424	E1B9I2	Uncharacterized protein	SAFB	21	8	109.22	202		7122500	14155000	10137000	6180500	1.19052e+07	1.58632e+07	2.07477e+07	8.47948e+07	8.27151e+07	3.73764e+06	4.87557e+07	4.31358e+07	3.41093e+07	2.60954e+07		20.1941	22.764	23.7548	23.2731	22.5593	23.5051	23.9192	24.3065	26.3375	26.3016	21.8337	25.5391	25.3624	25.0237	24.6373			2.22719	1.46575	8.36488	13.3832		6.8453	3.04739	3.36483	4.22222
Q5E947;Q06830;Q9BGI2;Q13162	Q5E947;Q06830;Q9BGI2;Q13162	Peroxiredoxin-1;Peroxiredoxin-4	PRDX1;PRDX4	2	2	6.4624	41	5484100		2161200	3260100	2685500	4.37989e+06	9.04951e+06	5.9253e+06	8.68721e+06	7.48757e+06	9.47405e+06	1.33854e+07		4.80733e+06	7.54518e+06		22.3868	17.7395	21.0434	21.6365	21.3568	22.0625	23.1094	22.4985	23.0505	22.8361	23.1755	23.6742	20.3302	22.1968	22.8471		0.798652		2.74167	2.66471	2.78815	1.72755			1.4746	2.8096
Q2G2B2	Q2G2B2	Surface protein G	sasG SAOUHSC_02798	19	19	35.728	102	95947000	95172000	46272000	2356300	3004700	4.84051e+07	7.56733e+07	6.19654e+07		1.499e+06	3.2531e+08	1.5221e+07	1.5849e+07				26.5157	26.504	25.4636	21.1681	21.5188	25.5287	26.1733	25.885	19.3316	20.5156	28.2772	23.8596	23.9179	18.482	17.1354		0.504499	0.795121	1.33916		0.498886	3.39052	0.159931	0.342518
F1MPL4;Q3T0Q4;P52175;P52174;P22392;P15531;G1K1A3;O60361	F1MPL4;Q3T0Q4;P52175;P52174;P22392;P15531;G1K1A3;O60361	Nucleoside diphosphate kinase B;Nucleoside diphosphate kinase A;Putative nucleoside diphosphate kinase	NME2;NME1;NME2P1	2	2	2.4101	9	9353800				1610200	2.4613e+06		1.5336e+06	4.22118e+06	2.48624e+06	2.05876e+07						23.1571	19.5905	18.8616	17.8593	20.6188	21.231	18.1124	20.5485	22.0092	21.2455	24.2953	19.0566	20.1929	19.4819	16.8642		0.263134				1.54405	2.20099
P13861;P00515	P13861;P00515	cAMP-dependent protein kinase type II-alpha regulatory subunit	PRKAR2A	2	2	2.2848	6	31850000					1.61006e+07	8.00273e+06	1.48585e+07	2.84207e+06	3.28675e+06	6.90949e+07		7.99195e+06	1.94501e+06	2.76676e+06		24.9248	18.4482	18.2657	17.753	17.7778	23.9406	22.9321	23.8248	21.4385	21.6482	26.0421	19.3843	22.9301	20.8913	21.3998		0.505512					2.16939
P49064	P49064	Serum albumin	ALB	9	1	24.594	24	48508000	4816600		83966000	4816100	2.06604e+07	2.11559e+07	2.05291e+07	1.00306e+07	7.77668e+06	2.68062e+08	1.38274e+07	1.2839e+07				25.5317	22.1996	20.0768	26.3233	22.1994	24.3004	24.3346	24.2912	23.2579	22.8907	27.998	23.721	23.614	19.4586	19.8849		0.425917	4.39229		0.11946	1.61473	5.52614	2.87079
Q5E997;P47755	Q5E997;P47755	F-actin-capping protein subunit alpha-2	CAPZA2	7	4	81.824	40				31252000	20640000	3.11675e+06	2.45871e+06	3.43988e+06	1.553e+07	1.1021e+07		2.01389e+07	8.75928e+06	8.45861e+06			18.7788	20.3003	21.2608	24.8974	24.2989	21.5716	21.2295	21.7139	23.8886	23.3937	18.636	24.2635	23.0624	23.012	19.3663					0.496927	0.533962				0.270658
Q3B7N2;P12814;F1MRD4;Q3ZC55;P35609	Q3B7N2;P12814	Alpha-actinin-1	ACTN1	32	19	51.781	74		5093100	11051000	22356000	51727000	1.73914e+07	163870		1.21073e+08	9.39706e+07	9.61963e+06			2.24694e+06	4.66979e+06		20.0585	22.2801	23.3977	24.4142	25.6244	24.0519	17.3222	17.6157	26.8513	26.4857	23.1975	20.4971	19.1584	21.0995	22.1549			0.0321748		5.41569	1.81666				0.100507	0.0902777
P61284;G3MZG7;P30050;F1MDX5	P61284;G3MZG7;P30050	60S ribosomal protein L12	RPL12	3	3	5.3941	11	6767900			3680400	2775500	2.07658e+06		1.29112e+06	3.51651e+06		3.70263e+06						22.6903	18.4029	17.7485	21.8114	21.4043	20.9858	18.0072	20.3002	21.7457	18.6008	21.8201	18.743	17.4637	19.2621	19.3805		0.306827			0.955469		0.547086
Q3T0V4;P61270;P62281;P62280	Q3T0V4;P61270;P62281;P62280	40S ribosomal protein S11	Rps11;RPS11	2	2	3.1712	26		2537000		2094100			2.05463e+06	1.07084e+07	5.64664e+06	7.25393e+06			1.75497e+06	6.0671e+06	6.37176e+06		18.8545	21.2747	18.7637	20.9979	18.4562	18.727	20.9704	23.3522	22.429	22.7903	19.8305	19.1541	20.743	22.5326	22.6033			0.809866		2.69645					2.89723
Q5E963;Q9BPX5	Q5E963;Q9BPX5	Actin-related protein 2/3 complex subunit 5-like protein	ARPC5L	3	3	2.9271	2				11313000	10907000			3.32168e+06	1.26078e+07	1.17841e+07				1.13806e+07			18.616	15.4752	17.4109	23.4315	23.3788	17.9757	18.7918	21.6635	23.5878	23.4903	19.2013	20.7707	18.5463	23.4401	18.822					1.11445	1.08041				1.00597
Q2KII5;P58876;P10854;Q32S29;Q99879;Q99880;Q8CGP2;G3N068;G3N053;E1BK75;Q96A08;P70696;G3MWH4;A6QQ28;E1BKX5;G3MZL8;G5E6E8;G3N080;F1N5F3;E1BAA6;G5E6I9;V6F804;F1MVX6;G3MZ02;E1BHL3;G3MX03;G3N0M9;G3N0L9;G3MZR4;G3MY27;F1MUU9;E1B7N8;G3MXL0;E1BPK0;E1BLK2;E1BL49;E1B975;Q1E5N0;F1N6G1;E1B896;E1BM22;G3MXG7	Q2KII5;P58876;P10854;Q32S29;Q99879;Q99880;Q8CGP2;G3N068;G3N053;E1BK75;Q96A08;P70696;G3MWH4	Histone H2B type 1-D;Histone H2B type 1-M;Histone H2B type 1-L;Histone H2B type 1-P;Histone H2B type 1-A	HIST1H2BD;Hist1h2bm;HIST1H2BM;HIST1H2BL;Hist1h2bp;HIST1H2BA;Hist1h2ba	13	1	161.07	237	98867000	259860000	52448000	125500000	156990000	5.48852e+08	6.34333e+06	5.02411e+06	2.3196e+09	1.10236e+09	5.62151e+07	1.66771e+08	1.24627e+08	3.60736e+07	1.15553e+07		26.559	27.9532	25.6444	26.9031	27.2261	29.0318	22.5968	22.2604	31.1112	30.0379	25.7445	27.3133	26.893	25.1044	23.4621		5.55142	0.0244105	0.0957922	18.4829	7.02184	0.568594	0.641773	2.3762	0.287439	0.0736054
A4FV23	A4FV23	DDX21 protein	DDX21	2	2	2.1884	2		722660	689330	1311900	719280	1.61151e+06	994667	969823	1.57815e+06	3.03356e+06		1.90392e+06	2.47087e+06				19.171	19.463	19.3948	20.3232	19.4562	20.62	19.9239	19.8874	20.5898	21.5326	20.6257	20.8605	21.2366	19.3256	18.5521			1.3764	1.40691	1.20295	4.2175		2.6346	3.58445
Q5E9E6;P62906;G3X7N2;E1BKD0	Q5E9E6;P62906;G3X7N2	60S ribosomal protein L10a	RPL10A	3	3	15.434	34	22195000	6019700	2467500	5426200	5777900	2.11951e+07	1.52076e+07	1.40628e+07	7.46144e+06	6.38696e+06	2.71269e+07	1.14392e+07	5.1813e+06	5.65739e+06	6.58918e+06		24.4037	22.5213	21.2346	22.3715	22.4621	24.3372	23.8583	23.7454	22.831	22.6067	24.6932	23.4475	22.3049	22.4317	22.6517		0.954948	2.5263	5.69921	1.37508	1.10541	1.22221	1.9003	2.09982	1.04261	1.14041
P79136	P79136	F-actin-capping protein subunit bet...	CAPZB	17	4	294.33	204	5893900	198820		173440000	192200000	1.04772e+07	5.60719e+06	7.35887e+06	8.09504e+07	6.43331e+07	1.10662e+07	5.54091e+06	1.15696e+07	1.4427e+07	2.57213e+07		22.4908	17.6011	18.2704	27.3699	27.518	23.3207	22.4188	22.8111	26.2705	25.9391	23.3997	22.4017	23.4638	23.7823	24.6165		1.77763	28.2023		0.466734	0.33472	1.87756	27.869		0.0831815	0.133826
G5E631;O00571;D3IVZ2;O15523;Q62167	G5E631;O00571;D3IVZ2;O15523;Q62167	ATP-dependent RNA helicase DDX3X;ATP-dependent RNA helicase DDX3Y	DDX3X;DDX3Y;Ddx3x	6	2	12.814	21				1582800	1448200		5.63037e+06	3.08841e+06	8.22659e+06	5.02683e+06		7.97781e+06	8.09253e+06				19.5733	19.2932	19.092	20.594	20.4658	17.9915	22.4248	21.5584	22.9719	22.2612	18.8878	22.9276	22.9482	18.9285	18.8002					5.19749	3.47109
F1MPT5;Q03001	F1MPT5	Uncharacterized protein	DST	7	7	14.532	34			1743900	3410800	4369100	5.29901e+06			6.88969e+06	4.48751e+06					6.01819e+06		18.1086	18.9277	20.7339	21.7017	22.0589	22.3373	18.3332	17.7185	22.716	22.0975	19.4225	19.4023	19.8481	17.1429	22.5209					2.01996	1.0271					1.37744
P62157;F1N6C0;Q6PI52;P62158;F1MLH6;P62203	P62157;F1N6C0;Q6PI52;P62158	Calmodulin	calm1a;CALM1	3	3	44.494	12					566350	2.37022e+07			4.5316e+06	3.68979e+06	1.06387e+07						18.3482	18.1145	17.9393	18.154	19.1113	24.4985	18.8168	17.6958	22.1116	21.8151	23.3428	18.4711	19.1921	19.4271	19.0357						6.51504
P04272	P04272	Annexin A2	ANXA2 ANX2	6	1	22.382	36	17640000		1937900	10149000	4839400	9.24699e+06	2.10595e+06	1.92337e+06	1.50758e+07	5.58477e+06	3.27809e+07		2.42522e+06		4.86128e+06		24.0723	17.8766	20.8861	23.2748	22.2064	23.1406	21.006	20.8752	23.8457	22.4131	24.9664	18.6082	21.2097	19.6514	22.2129		0.524206		0.992503	1.48545	1.15402	1.85832		1.25147		1.00452
P48616;P08670;A6QQJ3;P41219;A6QP32;Q28115;P03995;P14136;Q08DH7;O77788;F1MDZ2;Q16352;P07197;P07196	P48616;P08670	Vimentin	VIM	80	20	323.31	4101	1782900000	2193400000	2072000000	4343100000	3441200000	2.78405e+09	8.31461e+08	8.48914e+08	1.75105e+10	1.56504e+10	8.64307e+08	3.39996e+09	3.28162e+09	1.91113e+09	1.98164e+09		30.7316	31.0305	30.9484	32.0161	31.6803	31.3745	29.6311	29.661	34.0275	33.8655	29.687	31.6629	31.6118	30.8318	30.8841		1.56153	0.379074	0.409707	4.03179	4.54793	0.484776	1.55008	1.58379	0.440039	0.575858
F1MD77;P11047;Q1LVF0	F1MD77	Uncharacterized protein	LAMC1	26	26	106.28	177	19007000	2881300	2255400	31918000	29933000	2.92473e+07		345163	1.83281e+08	1.58479e+08	2.82738e+07	1.73134e+06	4.69975e+06	1.35415e+06	1.33101e+06		24.18	21.4583	21.105	24.9279	24.8352	24.8018	18.7562	18.3969	27.4495	27.2397	24.753	20.7235	22.1642	20.369	20.3441		1.53876		0.153038	5.74223	5.29445	1.48755	0.600888	2.08378	0.0424258	0.0444663
F1MF97;Q14112	F1MF97	Uncharacterized protein	NID2	34	34	192.35	409	265610000	44053000	47589000	149740000	128280000	2.39913e+08	3.03842e+07	2.50383e+07	3.88347e+08	3.34278e+08	4.74194e+08	4.02268e+07	2.94722e+07	4.28562e+07	4.57405e+07		27.9847	25.3927	25.5041	27.1579	26.9347	27.8379	24.8568	24.5776	28.5328	28.3165	28.8209	25.2617	24.8129	25.353	25.447		0.903253	0.689718	0.526137	2.59348	2.60585	1.7853	0.913146	0.619308	0.286204	0.356568
E1BF20;P31943	E1BF20;P31943	Heterogeneous nuclear ribonucleoprotein H;Heterogeneous nuclear ribonucleoprotein H, N-terminally processed	HNRNPH1	11	5	113.28	102	4248400	16484000	11472000	31580000	33727000	1.10834e+07	3.36313e+07	2.94374e+07	1.34556e+08	1.26775e+08	1.10447e+07	4.27189e+07	4.57968e+07	3.39553e+07	3.09941e+07		22.0185	23.9746	23.4516	24.9125	25.0074	23.4019	25.0033	24.8111	27.0036	26.9177	23.3969	25.3484	25.4487	25.0171	24.8855		2.60884	2.04024	2.56603	4.2608	3.75885	2.59974	2.59154	3.99205	1.07522	0.918971
A7MB62;Q56A35;P61160;F1MRG7	A7MB62;Q56A35;P61160;F1MRG7	Actin-related protein 2-B;Actin-related protein 2	actr2b;ACTR2	6	6	13.199	30	2395500	3970800	4921100	14401000	12194000	3.61605e+06	2.92534e+06		2.427e+07	4.04221e+07	4.29615e+06			9.68289e+06	3.99284e+06		21.1919	21.921	22.2305	23.7797	23.5397	21.786	21.4802	18.6658	24.5327	25.2686	22.0346	20.1031	18.9366	23.207	21.929		1.50952	0.736713		1.6853	3.31491	1.79343			0.672376	0.327443
Q3B8S0;P55769	Q3B8S0;P55769	NHP2-like protein 1;NHP2-like protein 1, N-terminally processed	NHP2L1	2	2	2.1619	15		4201700		4191600	5479800	2.84854e+06			1.23231e+07	1.04143e+07							18.6258	22.0025	18.2274	21.9991	22.3857	21.4418	17.5969	16.579	23.5549	23.3121	19.7072	19.6041	18.9467	19.5507	18.9354					2.93995	1.90048
F1MKP6;Q3B7N0;P55290;Q9WTR5	F1MKP6;Q3B7N0;P55290;Q9WTR5	Cadherin-13	CDH13;Cdh13	6	6	13.001	27	2962300	1020300	1394900	2239700	1467100	1.022e+07		1.06722e+06	2.33138e+07	3.03431e+07		3.16842e+06	3.10774e+06	5.29791e+06	3.71316e+06		21.4983	19.9606	20.4117	21.0949	20.4845	23.2849	19.0069	20.0254	24.4747	24.8549	18.4106	21.5953	21.5674	22.337	21.8242		3.45001		0.76509	10.4093	20.6823		3.10538	2.22793	2.36546	2.53096
Q5EAD6;G5E686;E1BK63;P61313	Q5EAD6;G5E686;E1BK63;P61313	60S ribosomal protein L15	RPL15	3	3	5.0404	12	5092700			2701600	2864900	2.61185e+06	2.28874e+06	4.91799e+06			4.96582e+06						22.28	17.7518	17.512	21.3654	21.4501	21.3166	21.1261	22.2296	19.5557	18.4941	22.2436	18.9946	19.8834	18.2316	19.2052		0.512861					0.975086
P00974;P04815;G3X7A8	P00974	Pancreatic trypsin inhibitor		3	2	78.223	185	96253000	1219200000	872640000	2184900000	1360300000	6.73377e+07	1.71249e+09	1.81191e+09	2.9373e+09	2.14202e+09	1.66479e+08	1.62386e+09	7.60986e+08	3.8503e+08	4.34217e+08		26.5203	30.1833	29.7008	31.0249	30.3413	26.0049	30.6734	30.7549	31.4518	30.9963	27.3108	30.5968	29.5033	28.5204	28.6938		0.699591	1.4046	2.07636	1.34436	1.57467	1.7296	1.33191	0.87205	0.176223	0.319206
P51176;A0A140T892	P51176;A0A140T892	Protein-glutamine gamma-glutamyltra...	TGM2	24	17	204.7	222	95983000	44261000	50828000	270660000	232480000	6.79807e+07	1.30222e+07	1.41664e+07	3.15818e+08	3.23295e+08	1.21669e+08	2.52017e+07	7.97135e+06	3.41304e+07	3.17582e+07		26.5163	25.3995	25.5991	28.0119	27.7925	26.0186	23.6345	23.756	28.2345	28.2683	26.8584	24.587	22.9264	25.0246	24.9206		0.708258	0.294213	0.278712	1.16684	1.39063	1.26761	0.569387	0.15683	0.126101	0.136606
P02313;F2Z4H2;P05204;Q3ZBV4;Q15651	P02313;F2Z4H2	Non-histone chromosomal protein HMG...	HMGN2 HMG17	6	6	11.439	20	1880800					8.27798e+06			1.40063e+07	1.48659e+07				1.62014e+06	1.73435e+06		20.8429	18.3796	17.4321	18.9323	17.8276	22.9808	17.8365	18.334	23.7396	23.8255	19.1729	19.9759	19.7814	20.6277	20.726		4.40131
Q1RMR3;Q14247	Q1RMR3;Q14247	Src substrate cortactin	CTTN	25	25	64.34	110	9189400	24493000	11499000	15966000	43074000	1.63036e+08	6.86225e+06	5.53216e+06	2.55227e+08	2.23268e+08	1.96689e+08	1.45857e+07	1.41197e+07	8.85422e+06	6.72926e+06		23.1315	24.5459	23.455	23.9285	25.3603	27.2806	22.7102	22.3994	27.9272	27.7342	27.5513	23.798	23.7512	23.0779	22.682		17.7418	0.280172	0.481099	15.9856	5.18336	21.4039	0.595503	1.2279	0.554567	0.156225
F1MYX9;Q16363	F1MYX9	Uncharacterized protein	LAMA4	12	12	30.434	40	5590200		1613900	4057000	5286600	2.94378e+06	419119	1.55842e+06	4.57362e+07	3.43382e+07	7.77687e+06		2.55827e+06		1.57305e+06		22.4145	17.6775	20.6221	21.952	22.3339	21.4892	18.677	20.5717	25.4468	25.0333	22.8908	19.9993	21.2867	19.7374	20.5851		0.526596		0.965626	11.2734	6.49532	1.39116		1.58515		0.297555
E1BLS8;Q9Y6C2	E1BLS8;Q9Y6C2	EMILIN-1	EMILIN1	10	10	23.244	45	5668300	4131100		4871600	4625900	4.92077e+06	1.47271e+06		4.56655e+07	6.99702e+07	1.65521e+07			1.71195e+06	3.29483e+06		22.4345	21.9781	17.7067	22.216	22.1413	22.2305	20.49	18.6042	25.4446	26.0602	23.9805	19.3505	19.2101	20.7072	21.6518		0.86812	0.356494		9.37382	15.1257	2.92012			0.351414	0.712256
Q3T106;Q16629	Q3T106;Q16629	Serine/arginine-rich splicing factor 7	SRSF7	2	2	2.893	19	2058300					4.73396e+06		1.72775e+06	4.56047e+06	4.52084e+06	7.14773e+06						20.973	18.3184	17.7749	17.9488	17.5661	22.1746	17.4256	20.7205	22.1208	22.1082	22.7691	19.0922	18.5295	18.4894	19.5363		2.29994					3.47264
Q3SZ59;F1MG09;G3N2Y0;Q969Q0;P83882;P83881;G8JL02	Q3SZ59;F1MG09;G3N2Y0;Q969Q0;P83882;P83881;G8JL02	60S ribosomal protein L36a-like;60S ribosomal protein L36a	RPL36AL;Rpl36a;RPL36A	2	2	2.6003	36	14989000		4547500	3305700	5832500	1.93899e+07	6.50489e+06	1.06764e+07	1.21656e+07	1.99755e+07			4.48634e+07	1.48059e+07	1.23184e+07		23.8374	18.9576	22.1166	21.6565	22.4757	24.2088	22.6331	23.3479	23.5363	24.2517	19.2212	19.2977	25.419	23.8197	23.5543		1.29361		2.34774	3.6802	3.42487			9.86551	4.47891	2.11203
G8JL00;F2Z4J1;A4IFU5;A0A0A0MP90;Q8CGP6;Q93077;Q8CGP7;Q8CGP5;Q8BFU2;Q7L7L0;P22752;P04908;F1MLQ1	G8JL00;F2Z4J1;A4IFU5;A0A0A0MP90;Q8CGP6;Q93077;Q8CGP7;Q8CGP5;Q8BFU2;Q7L7L0;P22752;P04908;F1MLQ1	Histone H2A type 1-H;Histone H2A type 1-C;Histone H2A type 1-K;Histone H2A type 1-F;Histone H2A type 3;Histone H2A type 1;Histone H2A type 1-B/E	Hist1h2ah;HIST1H2AC;Hist1h2ak;Hist1h2af;Hist3h2a;HIST3H2A;Hist1h2ab;HIST1H2AB	8	2	48.396	61	16332000		27939000	108190000	57785000	1.5065e+08			7.52505e+08	9.83381e+08	1.48241e+07	2.52566e+07					23.9612	16.5417	24.7358	26.689	25.7842	27.1666	16.3502	18.7338	29.4871	29.8732	23.8214	24.5902	19.3105	17.961	19.1729		9.22424			6.95541	17.0179	0.907671
Q13185;F1N1S3	Q13185	Chromobox protein homolog 3	CBX3	6	6	15.105	32	2372900	4847000		7386300	6973500	8.49079e+06			5.59873e+07	5.87649e+07	4.02959e+06			2.83202e+06			21.1782	22.2087	17.3837	22.8164	22.7335	23.0175	19.1933	18.4363	25.7386	25.8085	21.9422	19.8786	19.5847	21.4334	20.1772		3.57823			7.57988	8.42689	1.69817			0.383415
A6H7E3;Q5E9E1;O00151	A6H7E3;Q5E9E1;O00151	PDZ and LIM domain protein 1	PDLIM1	3	3	4.5894	12		2756800		6932000	5631400	698487			2.17313e+07	2.72602e+07		1.83022e+06					19.9241	21.3946	19.7026	22.7248	22.4251	19.4139	18.6571	18.8592	24.3733	24.7003	19.8749	20.8036	19.6844	19.6652	17.5363					3.13492	4.84075		0.663892
A7YY49;F1N6P2;O15260	A7YY49;F1N6P2;O15260	Surfeit locus protein 4	SURF4	2	2	6.0642	19							2.12603e+06	2.00417e+06	2.15546e+06	2.33563e+06					2.50751e+06		19.2247	18.0846	18.4083	19.3319	18.9601	17.9286	21.0197	20.9346	21.0396	21.1554	20.1906	18.719	18.8113	18.3237	21.2578
Q3T169;P23396	Q3T169;P23396	40S ribosomal protein S3	RPS3	2	1	3.2335	13	1773500				2059100	2.05608e+06	2.1992e+06	2.0691e+06		3.43475e+06	3218870				2.87272e+06		20.7582	18.7708	19.0403	18.1588	20.9736	20.9715	21.0686	20.9806	19.9684	21.7118	21.6181	19.4384	19.411	19.332	21.454		1.15933				1.66808	1.81498				1.39513
F2Z4J7;P45973;Q61686	F2Z4J7;P45973	Chromobox protein homolog 5	CBX5	4	4	7.2557	14	4556300			705840	1050500	3.00749e+06			1.94125e+07	2.02604e+07							22.1194	19.9177	18.1649	19.429	20.0026	21.5201	18.1535	17.2737	24.2105	24.2722	18.9519	20.2923	20.0966	18.6567	18.5826		0.660074			27.5026	19.2864
P61283;O75531	P61283;O75531	Barrier-to-autointegration factor;Barrier-to-autointegration factor, N-terminally processed	BANF1	4	4	10.191	18				6264500	5546400		2.4688e+06		1.22053e+07	1.29932e+07							18.8711	19.1894	18.8633	22.5788	22.4031	18.8084	21.2354	17.7122	23.541	23.6313	19.7573	19.4433	19.9882	18.7259	19.7629					1.94833	2.34264
Q02413;Q03763;F1MIW8	Q02413;Q03763;F1MIW8	Desmoglein-1	DSG1	5	5	12.247	22	7111600				796010	3.84308e+06	2.02048e+06	1.56796e+06	3.39517e+06	2.09473e+06	9194495				1.8837e+06		22.7617	19.2404	17.7049	17.7822	19.6024	21.8738	20.9463	20.5805	21.6951	20.9983	23.1323	19.2279	19.0363	17.5533	20.8451		0.540395				2.63154	1.29289				2.36643
Q3ZBX9;P0C0S9;F2Z4G5;A0A0A0MPA2;Q99878;Q96KK5;Q9BTM1;P20671;P0C0S8;A0A0A0MP93;Q17QG8;P27661;P16104;E1BH22;Q8IUE6	Q3ZBX9;P0C0S9;F2Z4G5;A0A0A0MPA2;Q99878;Q96KK5;Q9BTM1;P20671;P0C0S8;A0A0A0MP93	Histone H2A type 1-J;Histone H2A type 1-H;Histone H2A.J;Histone H2A type 1-D;Histone H2A type 1	HIST1H2AJ;HIST1H2AH;H2AFJ;HIST1H2AD;HIST1H2AG	9	0	323.31	415	399950000	300710000	324910000	1019700000	922880000	9.18183e+08	5.87192e+07	3.74655e+07	4.48978e+09	4.02061e+09	1.30852e+08	3.70847e+08	1.61182e+08	6.11102e+07	7.91431e+07		28.5752	28.1638	28.2755	29.9255	29.7816	29.7742	25.8073	25.1591	32.064	31.9048	26.9634	28.4662	27.2641	25.8649	26.238		2.29574	0.195268	0.11531	4.40304	4.35659	0.327171	1.23324	0.496083	0.0599296	0.0857567
F1MJ56;Q17R14;O94832	F1MJ56;Q17R14;O94832	Unconventional myosin-Id	MYO1D	24	24	88.499	96	1533200		1105900	5985400	30207000	5.47943e+07		1.30255e+06	9.58626e+07	1.22742e+08	3.44373e+06	2.83163e+06	2.75534e+06	1.90822e+06	2.15882e+06		20.5481	19.1242	20.0768	22.513	24.8484	25.7075	18.6889	20.3129	26.5145	26.8711	21.7155	21.4332	21.3938	20.8638	21.0418		35.7385		1.17782	16.0161	4.06338	2.24611		2.4915	0.318812	0.0714676
P04792	P04792	Heat shock protein beta-1	HSPB1	3	2	5.439	18				1563500	1929100	1.03843e+06			1.30825e+08	8.91825e+07							18.3925	18.1333	17.9577	20.5763	20.8795	19.986	18.4571	17.8426	26.9631	26.4103	18.7391	19.9043	18.2825	19.958	18.8747					83.6748	46.2301
E1B9H1;Q9GZM7	E1B9H1	Uncharacterized protein	TINAGL1	8	8	33.352	61	4872700	14238000	14032000	30175000	32839000	3.16287e+06	8.92475e+06	7.74346e+06	7.47106e+07	5.87593e+07	4.28632e+07	9.19891e+06			4.22096e+06		22.2163	23.7632	23.7422	24.8469	24.9689	21.5928	23.0894	22.8845	26.1548	25.8083	25.3532	23.133	19.9081	18.9237	22.0091		0.649101	0.626826	0.551843	2.47591	1.78932	8.7966	0.646082			0.128535
E1BDU8	E1BDU8	Uncharacterized protein	LIMA1	8	7	13.94	24		1912600	1058000	3252800	2824700	1.10844e+06			3.65748e+07	3.43196e+07							18.3372	20.8671	20.0129	21.6333	21.4297	20.0801	18.6717	18.3	25.1243	25.0325	18.9905	19.7453	19.5517	18.7141	19.2735					11.2441	12.1498
E1BFB0;Q13813;P07751	E1BFB0;Q13813;P07751	Spectrin alpha chain, non-erythrocytic 1	SPTAN1	49	49	181.96	304	10666000	5369100	14015000	87438000	82070000	4.55296e+07	2.89428e+06	6.95373e+06	2.80143e+08	2.80439e+08	1.83317e+06	1.0172e+07	1.94125e+07	1.34366e+07	9.50356e+06		23.3465	22.3562	23.7405	26.3818	26.2904	25.4403	21.4648	22.7294	28.0616	28.0631	20.8059	23.2781	24.2105	23.6797	23.18		4.26867	0.539063	0.496163	3.2039	3.41707	0.171871	1.89454	1.38512	0.15367	0.115798
Q3T0S6;P62917;E1BHY4	Q3T0S6;P62917	60S ribosomal protein L8	RPL8	7	7	19.184	64	9279000	7717000		12668000	13103000	1.93106e+07	1.95713e+07	2.03384e+07	8.74258e+06	7.33323e+06			1.95535e+07	1.02425e+07	1.3761e+07		23.1455	22.8796	18.3415	23.5947	23.6434	24.2029	24.2222	24.2777	23.0596	22.806	18.9762	20.7862	24.2209	23.2881	23.7141		2.08111	2.53613		0.690131	0.559661				0.808535	1.05022
B9KCH0;A7ZEB5;A7GXU4;Q6G554;Q6G1F9;A7I2D4	B9KCH0;A7ZEB5;A7GXU4;Q6G554;Q6G1F9;A7I2D4	Chaperone protein DnaK	dnaK Cla_0935	1	1	3.6662	36	18221000			13959000	11499000	1.17399e+07			2.54363e+07	1.4614e+07							24.1191	18.2629	18.1964	23.7347	23.455	23.4849	17.9489	17.7712	24.6004	23.8008	17.1471	19.9588	18.9788	20.2573	19.4871		0.644307			1.82221	1.27089
P81947;Q9BQE3;P68363;Q3ZCJ7;F1MNF8;F2Z4C1;A5A6J1;Q2HJ86;Q71U36;P81948;Q2HJB8;F6RP72;Q32KN8;F2Z4K0;P68366;Q9NY65;Q9JJZ2;Q6PEY2;Q13748;Q8WQ47;Q9H853	P81947;Q9BQE3;P68363;Q3ZCJ7;F1MNF8;F2Z4C1;A5A6J1;Q2HJ86;Q71U36;P81948;Q2HJB8;F6RP72;Q32KN8;F2Z4K0;P68366;Q9NY65;Q9JJZ2;Q6PEY2;Q13748	Tubulin alpha-1C chain;Tubulin alpha-1B chain;Tubulin alpha-1A chain;Tubulin alpha-4A chain;Tubulin alpha-8 chain;Tubulin alpha-3E chain;Tubulin alpha-3C/D chain	TUBA1C;TUBA1B;TUBA1A;TUBA4A;TUBA8;Tuba8;TUBA3E;TUBA3C	4	4	5.7718	44	3499500	5352700		13307000	11418000	3.60106e+06	1.38025e+06	9.89057e+06	1.56666e+07	1.21151e+07	8.09301e+06		1.36993e+07				21.7387	22.3518	17.7536	23.6657	23.4448	21.78	20.3965	23.2376	23.9012	23.5303	22.9482	18.7359	23.7076	19.1064	18.5983		1.02902	0.257861		1.17732	1.06105	2.31262
A5D7D1;O43707;Q0III9;Q08043;G3X7I1	A5D7D1;O43707	Alpha-actinin-4	ACTN4	41	27	210.53	390	6071200	77482000	72362000	242220000	290420000	4.67092e+07	1.74974e+07	1.40258e+07	5.56908e+08	5.21803e+08	4.93139e+06	3.99755e+07	2.60188e+07	2.89798e+07	2.51003e+07		22.5336	26.2074	26.1087	27.8517	28.1136	25.4772	24.0606	23.7416	29.0529	28.9589	22.2336	25.2526	24.6331	24.7885	24.5812		7.69357	0.225825	0.193828	2.29918	1.79672	0.81226	0.515932	0.359564	0.119642	0.0864276
A5D984;P52480;P14618	A5D984;P52480;P14618	Pyruvate kinase PKM	Pkm;PKM	2	2	2.722	17	2468800	2232800		3264400	2129800	2.24859e+06	5.29053e+06	6.3177e+06	3.30485e+06	4.17494e+06		5.65599e+06			6.23907e+06		21.2354	21.0904	17.6548	21.6384	21.0223	21.1006	22.335	22.591	21.6562	21.9933	19.8066	22.4313	19.246	18.6246	22.5729		0.910801	2.36946		1.01239	1.96025		2.53314			2.92942
G3N3W9;Q3T025;P18621;F1MQJ8;G3N288;E1BG46;E1B871;F1N0W3	G3N3W9;Q3T025;P18621;F1MQJ8;G3N288;E1BG46;E1B871;F1N0W3	60S ribosomal protein L17	RPL17	4	4	5.9985	13						6.29645e+06	7.21005e+06	5.12669e+06									19.4322	18.8834	18.7791	18.1893	17.8085	22.5861	22.7816	22.2896	19.1138	18.33	19.258	20.5269	19.6075	18.2077	19.1871
F1MYC9;Q01082;E1BMN5;P15508;P11277;O15020;F1MKE9	F1MYC9;Q01082	Spectrin beta chain, non-erythrocytic 1	SPTBN1	66	64	153.95	449	24611000	22999000	17699000	126590000	105230000	8.54252e+07	1.35371e+07	3.64791e+06	3.02133e+08	3.00471e+08	4.38921e+06	5.7424e+06	4.63016e+06	2.29427e+07	2.27075e+07		24.5528	24.4551	24.0772	26.9156	26.649	26.3482	23.6904	21.7986	28.1706	28.1626	22.0655	22.4532	22.1426	24.4515	24.4367		3.47102	0.588595	0.206108	2.38671	2.85537	0.178343	0.24968	0.261606	0.181236	0.21579
E1BF55	E1BF55	Uncharacterized protein	MAP7D2	2	2	2.2192	6				3451700	6658600	2.22925e+06	4.16359e+06	1.75257e+06	9.64144e+06	5.87891e+06					1.02285e+07		18.8793	18.5677	18.3825	21.7189	22.6668	21.0881	21.9894	20.741	23.2008	22.4871	18.7831	19.7785	19.1059	19.4415	23.2861					2.79324	0.882905					1.53613
G3X807;P62803;E1BLC2;E1BBP7;P62806;P62805;E1B7N2;G3N2B8;E1B9M9;G3N081;G3MYX0;P02309	G3X807;P62803;E1BLC2;E1BBP7;P62806;P62805;E1B7N2;G3N2B8;E1B9M9	Histone H4	Hist1h4a;HIST1H4A	7	5	28.331	107	6283800	10205000	6834500	705790	379980	6.99705e+08	6.32395e+06	6.62388e+06	2.22162e+08	3.03635e+08	1.34826e+08	3.19042e+06	3.43175e+06		1.91687e+06		22.5832	23.2828	22.7044	19.4289	18.5356	29.3822	22.5924	22.6592	27.727	28.1778	27.0065	21.6053	21.7105	19.2435	20.8703		111.351	0.619691	0.969182	314.771	799.083	21.4561	0.312633	0.502121		5.04467
F1N4Y8;F1N4Y9;F1MY38;G3N2C3;P54281;F1MXP7	F1N4Y8;F1N4Y9;F1MY38	Uncharacterized protein	CLCA3	8	8	27.6	46				5803800	5355000	4.77186e+06	4.39911e+06	2.17883e+06	3.97438e+07	3.27576e+07				6.87696e+06	4.59622e+06		18.8932	18.2037	17.5487	22.4686	22.3525	22.1861	22.0688	21.0551	25.2442	24.9653	19.0431	18.9739	19.3449	22.7133	22.132					6.84789	6.11721				1.18491	0.858304
A4IF97;Q5E9E2;P19105;O14950;Q1LZF9;P24844	A4IF97;Q5E9E2;P19105;O14950	Myosin regulatory light chain 12A;Myosin regulatory light chain 12B	MYL12A;MYL12B	9	9	169.82	86	70491000			26050000	26010000	6.5286e+07	4.2226e+07	3.58553e+07	2.92434e+08	1.79428e+08	7.88861e+07	8.99723e+07					26.0709	18.4091	19.3162	24.6348	24.6326	25.9603	25.3316	25.0957	28.1235	27.4188	26.2333	26.423	20.5808	19.833	18.6496		0.92616			11.2259	6.89842	1.11909
P68432;P68433;P68431;P0CO05;P0CO04;G3N2P2;Q16695;Q1E225;Q6NXT2	P68432;P68433;P68431;P0CO05;P0CO04;G3N2P2;Q16695	Histone H3.1;Histone H3.1t	Hist1h3a;HIST1H3A;HIST3H3	4	1	13.769	32	2366800	18104000	17784000	2113900	2994300	6.5868e+07	1.02811e+07	1.06394e+07	1.27329e+08	1.28422e+08	6.93468e+06	1.67394e+07	1.61826e+07	8.67254e+06	4.6481e+06		21.1745	24.1098	24.0841	21.0115	21.5138	25.9731	23.2935	23.3429	26.924	26.9363	22.7254	23.9967	23.9479	23.048	22.1482		27.83	0.567892	0.598255	60.234	42.8889	2.92998	0.924623	0.909955	4.10263	1.55232
Q2HJ65;O75367;Q1LZ92;Q9P0M6	Q2HJ65;O75367	Core histone macro-H2A.1	H2AFY	5	5	10.89	12					4044300	8.45956e+06			1.35214e+07	1.22806e+07							18.0209	17.9304	19.4371	18.9145	21.9475	23.0122	19.4532	18.4058	23.6887	23.5499	19.5712	18.0615	18.6992	18.6933	18.9711						3.03651
Q9ZMY3	Q9ZMY3	RNA polymerase sigma factor RpoD	rpoD jhp_0081	2	2	2.4588	29	1553600000	10001000000	5898500000			1.37201e+08	2.69043e+09	1.47121e+08	5.01127e+07	4.20063e+08	8.24115e+08	8.07246e+06					30.533	33.2194	32.4577	18.2082	17.5895	27.0317	31.3252	27.1324	25.5787	28.646	29.6183	22.9446	19.048	18.3774	20.1363		0.0883116	0.269016	0.0249422			0.530455	0.000807166
F1MQ21	F1MQ21	Nestin	NES	33	32	263.1	257	6966300	15619000	4765000	69151000	46048000	6.60711e+07	2.48446e+06	4.03916e+06	3.88151e+08	4.4285e+08		5.03051e+06	4.06528e+06	1.25522e+06	559545		22.732	23.8968	22.184	26.0432	25.4566	25.9775	21.2445	21.9456	28.532	28.7222	19.605	22.2623	21.9549	20.2595	19.0939		9.48439	0.159066	0.847673	5.61309	9.61714		0.322076	0.853155	0.0181518	0.0121513
[truncated: 26 more columns]

## Sheet: List of ZO-1 interactors
ZO-1 interactors			VEGF regulated interactors
AKAP2			AKAP2
AIMP1			AIMP1
CHMP4B			CHMP4B
HIST1H1C			HIST1H1C
RPS8			RPS8
ANKRD50			ANKRD50
Uncharacterized protein			Uncharacterized protein
DENND1A			DENND1A
SNRPD1			SNRPD1
TCEB2			TCEB2
RARS			RARS
RBM3			RBM3
PDLIM5			PDLIM5
RPL34			RPL34
PDX1			PDX1
FUS			FUS
RPL18A			RPL18A
RPS6			RPS6
CHMP5			CHMP5
GAPDH			GAPDH
Uncharacterized protein			Uncharacterized protein
RPL7A			RPL7A
HNRNPUL1			HNRNPUL1
CALD1			CALD1
CGN			CGN
HSP27			HSP27
KPRP			KPRP
ALYREF			ALYREF
SF3B2			SF3B2
LMNA			LMNA
YBX1			YBX1
IFT20			IFT20
CPSF6			CPSF6
SAPS3			SAPS3
TMX3			YWHAZ
NUP205			CCT4
ZC3H13			SRSF6
SLC39A10			TXN
TACC3			PCM1
WTAP			TMEM263
INF2			DNAH8
MOV10			HMGN1
SPAG9			NUFIP2
RIPK2			TPI1
FBLN2			MAP4
TAX1BP1			MYH11
LUZP1			RPS27A
CCDC47			LOC535277
PEX5			Uncharacterized protein
KIAA1429			DSP
ADSL			JUP
TJP2			TPM1
TBC1D4			TPM4
TJP1			LOC101904481
KIAA1468			HIST1H1B
CGNL1			TPM3
PGAM5			DBN1
NUDT21			MYL1
AKAP8L			TACC2
GJA1			PPIA
RPL11			MYL6
KIAA1462			RBMX
TRA2B			BTF3
PDE4C
SNRPN
RPS27L
TUBB
SRSF12
CGGBP1
YBX3
CCDC6
CBS
AIMP2
DDB1
YWHAZ
CCT4
SRSF6
TXN
PCM1
TMEM263
DNAH8
HMGN1
NUFIP2
TPI1
MAP4
MYH11
RPS27A
LOC535277
Uncharacterized protein
DSP
JUP
TPM1
TPM4
LOC101904481
HIST1H1B
TPM3
DBN1
MYL1
TACC2
PPIA
MYL6
RBMX
HNRNPAB
PDE4D
HNRNPA3
ATP5A1
PCMT1
HNRNPD
CFL1
HSPA8
DDX31
CBLL1
DLAT
RPL13
Cyr61
ILF2
RPL24
SNRPD3
TUFM
RPL23A
RPS20
SBSN
HSPA1B
MFAP1
RBM14
RPS9
SLC25A6
HNRNPF
RSL1D1
BTF3
TRIM21

## Sheet: ZO-1 interactors Enrichment
source	term_name	term_id	adjusted_p_value	negative_log10_of_adjusted_p_value	term_size	intersection_size	intersections
GO:MF	RNA binding	GO:0003723	7.13641e-22	21.1465	1951	55	AIMP1,RPS8,SNRPD1,RBM3,RPL34,FUS,RPL18A,RPS6,RPL7A,HNRNPUL1,ALYREF,SF3B2,YBX1,CPSF6,ZC3H13,MOV10,CCDC47,NUDT21,AKAP8L,RPL11,TRA2B,SNRPN,RPS27L,SRSF12,YBX3,YWHAZ,CCT4,SRSF6,TXN,NUFIP2,MAP4,RPS27A,DSP,PPIA,RBMX,HNRNPAB,HNRNPA3,HNRNPD,HSPA8,DDX31,RPL13,ILF2,RPL24,SNRPD3,TUFM,RPL23A,RPS20,HSPA1B,MFAP1,RBM14,RPS9,HNRNPF,RSL1D1,BTF3,TRIM21
GO:MF	structural molecule activity	GO:0005198	4.50675e-12	11.3461	701	27	RPS8,RPL34,RPL18A,RPS6,RPL7A,LMNA,NUP205,FBLN2,RPL11,RPS27L,TUBB,CCDC6,MAP4,MYH11,RPS27A,DSP,JUP,TPM1,TPM4,MYL1,MYL6,RPL13,CYR61,RPL24,RPL23A,RPS20,RPS9
GO:MF	nucleic acid binding	GO:0003676	6.07745e-09	8.21628	4252	59	AIMP1,RPS8,SNRPD1,RBM3,RPL34,PDX1,FUS,RPL18A,RPS6,RPL7A,HNRNPUL1,ALYREF,SF3B2,YBX1,CPSF6,ZC3H13,MOV10,CCDC47,NUDT21,AKAP8L,RPL11,TRA2B,SNRPN,RPS27L,SRSF12,CGGBP1,YBX3,DDB1,YWHAZ,CCT4,SRSF6,TXN,HMGN1,NUFIP2,MAP4,RPS27A,DSP,PPIA,RBMX,HNRNPAB,HNRNPA3,HNRNPD,HSPA8,DDX31,RPL13,ILF2,RPL24,SNRPD3,TUFM,RPL23A,RPS20,HSPA1B,MFAP1,RBM14,RPS9,HNRNPF,RSL1D1,BTF3,TRIM21
GO:MF	cadherin binding	GO:0045296	8.65272e-09	8.06285	333	17	CHMP4B,PDLIM5,RPL34,CHMP5,RPL7A,CALD1,CGN,TJP2,TJP1,YWHAZ,JUP,DBN1,PCMT1,HSPA8,RPL24,RPL23A,RSL1D1
GO:MF	structural constituent of ribosome	GO:0003735	1.75498e-08	7.75573	171	13	RPS8,RPL34,RPL18A,RPS6,RPL7A,RPL11,RPS27L,RPS27A,RPL13,RPL24,RPL23A,RPS20,RPS9
GO:MF	cell adhesion molecule binding	GO:0050839	4.64003e-08	7.33348	544	20	CHMP4B,PDLIM5,RPL34,CHMP5,RPL7A,CALD1,CGN,TJP2,TJP1,YWHAZ,DSP,JUP,DBN1,PPIA,PCMT1,HSPA8,CYR61,RPL24,RPL23A,RSL1D1
GO:MF	heterocyclic compound binding	GO:1901363	8.43901e-06	5.07371	6210	67	AIMP1,RPS8,SNRPD1,RBM3,RPL34,PDX1,FUS,RPL18A,RPS6,GAPDH,RPL7A,HNRNPUL1,ALYREF,SF3B2,YBX1,CPSF6,ZC3H13,MOV10,RIPK2,CCDC47,NUDT21,AKAP8L,RPL11,TRA2B,SNRPN,RPS27L,TUBB,SRSF12,CGGBP1,YBX3,CBS,DDB1,YWHAZ,CCT4,SRSF6,TXN,DNAH8,HMGN1,NUFIP2,MAP4,MYH11,RPS27A,DSP,PPIA,RBMX,HNRNPAB,PDE4D,HNRNPA3,HNRNPD,HSPA8,DDX31,RPL13,CYR61,ILF2,RPL24,SNRPD3,TUFM,RPL23A,RPS20,HSPA1B,MFAP1,RBM14,RPS9,HNRNPF,RSL1D1,BTF3,TR…
GO:MF	organic cyclic compound binding	GO:0097159	1.50095e-05	4.82363	6291	67	AIMP1,RPS8,SNRPD1,RBM3,RPL34,PDX1,FUS,RPL18A,RPS6,GAPDH,RPL7A,HNRNPUL1,ALYREF,SF3B2,YBX1,CPSF6,ZC3H13,MOV10,RIPK2,CCDC47,NUDT21,AKAP8L,RPL11,TRA2B,SNRPN,RPS27L,TUBB,SRSF12,CGGBP1,YBX3,CBS,DDB1,YWHAZ,CCT4,SRSF6,TXN,DNAH8,HMGN1,NUFIP2,MAP4,MYH11,RPS27A,DSP,PPIA,RBMX,HNRNPAB,PDE4D,HNRNPA3,HNRNPD,HSPA8,DDX31,RPL13,CYR61,ILF2,RPL24,SNRPD3,TUFM,RPL23A,RPS20,HSPA1B,MFAP1,RBM14,RPS9,HNRNPF,RSL1D1,BTF3,TR…
GO:MF	protein binding	GO:0005515	3.70331e-05	4.43141	14767	110	AKAP2,AIMP1,CHMP4B,RPS8,ANKRD50,DENND1A,SNRPD1,RBM3,PDLIM5,RPL34,PDX1,FUS,RPL18A,RPS6,CHMP5,GAPDH,RPL7A,HNRNPUL1,CALD1,CGN,KPRP,SF3B2,LMNA,YBX1,IFT20,CPSF6,SAPS3,TMX3,NUP205,ZC3H13,TACC3,WTAP,INF2,MOV10,SPAG9,RIPK2,FBLN2,TAX1BP1,CCDC47,PEX5,ADSL,TJP2,TBC1D4,TJP1,CGNL1,PGAM5,NUDT21,AKAP8L,GJA1,RPL11,TRA2B,PDE4C,SNRPN,RPS27L,TUBB,SRSF12,CGGBP1,YBX3,CCDC6,CBS,AIMP2,DDB1,YWHAZ,CCT4,SRSF6,TXN,PCM1,DNA…
GO:MF	enzyme binding	GO:0019899	0.00053019	3.27557	2048	31	AIMP1,DENND1A,PDLIM5,RPS6,HNRNPUL1,YBX1,IFT20,SAPS3,INF2,SPAG9,RIPK2,TAX1BP1,PEX5,TJP2,NUDT21,AKAP8L,RPL11,TUBB,YBX3,CBS,YWHAZ,TPI1,RPS27A,DSP,JUP,PDE4D,HNRNPD,HSPA8,SNRPD3,HSPA1B,TRIM21
GO:MF	structural constituent of muscle	GO:0008307	0.00279348	2.55385	43	5	MYH11,TPM1,TPM4,MYL1,MYL6
GO:MF	mRNA binding	GO:0003729	0.0031376	2.5034	553	14	RBM3,FUS,YBX1,CPSF6,NUDT21,TRA2B,YBX3,SRSF6,RBMX,HNRNPAB,HNRNPA3,HNRNPD,RBM14,RSL1D1
GO:MF	protein domain specific binding	GO:0019904	0.0115171	1.93866	706	15	DENND1A,GAPDH,RIPK2,TJP2,TJP1,GJA1,TRA2B,TUBB,SRSF12,CCDC6,DDB1,YWHAZ,RBMX,HSPA8,HSPA1B
GO:MF	protein-containing complex binding	GO:0044877	0.0165473	1.78127	1304	21	SNRPD1,RBM3,PDX1,CPSF6,CCDC47,PGAM5,TUBB,YBX3,DDB1,HMGN1,MYH11,JUP,TPM1,TPM4,TPM3,DBN1,PPIA,CFL1,HSPA8,CYR61,RPL23A
GO:MF	protein folding chaperone	GO:0044183	0.0300307	1.52244	36	4	CCDC47,CCT4,HSPA8,HSPA1B
GO:BP	mRNA metabolic process	GO:0016071	4.41259e-21	20.3553	880	40	RPS8,SNRPD1,RBM3,RPL34,FUS,RPL18A,RPS6,RPL7A,HNRNPUL1,SF3B2,YBX1,CPSF6,ZC3H13,WTAP,MOV10,NUDT21,AKAP8L,RPL11,TRA2B,SNRPN,SRSF12,YBX3,YWHAZ,SRSF6,RPS27A,RBMX,HNRNPA3,HNRNPD,HSPA8,CBLL1,RPL13,RPL24,SNRPD3,RPL23A,RPS20,HSPA1B,MFAP1,RBM14,RPS9,HNRNPF
GO:BP	RNA processing	GO:0006396	2.93565e-13	12.5323	1010	34	RPS8,SNRPD1,RBM3,RPL34,FUS,RPL18A,RPS6,RPL7A,HNRNPUL1,SF3B2,YBX1,CPSF6,ZC3H13,WTAP,NUDT21,AKAP8L,RPL11,TRA2B,SNRPN,SRSF12,SRSF6,RBMX,HNRNPA3,HNRNPD,HSPA8,RPL13,RPL24,SNRPD3,RPL23A,MFAP1,RBM14,RPS9,HNRNPF,RSL1D1
GO:BP	RNA splicing, via transesterification reactions with bulged adenosine as nucleophile	GO:0000377	1.42633e-10	9.84578	360	20	SNRPD1,RBM3,FUS,HNRNPUL1,SF3B2,YBX1,WTAP,NUDT21,TRA2B,SNRPN,SRSF12,SRSF6,RBMX,HNRNPA3,HNRNPD,HSPA8,SNRPD3,MFAP1,RBM14,HNRNPF
GO:BP	mRNA splicing, via spliceosome	GO:0000398	1.42633e-10	9.84578	360	20	SNRPD1,RBM3,FUS,HNRNPUL1,SF3B2,YBX1,WTAP,NUDT21,TRA2B,SNRPN,SRSF12,SRSF6,RBMX,HNRNPA3,HNRNPD,HSPA8,SNRPD3,MFAP1,RBM14,HNRNPF
GO:BP	RNA splicing	GO:0008380	1.43659e-10	9.84267	459	22	SNRPD1,RBM3,FUS,HNRNPUL1,SF3B2,YBX1,ZC3H13,WTAP,NUDT21,AKAP8L,TRA2B,SNRPN,SRSF12,SRSF6,RBMX,HNRNPA3,HNRNPD,HSPA8,SNRPD3,MFAP1,RBM14,HNRNPF
GO:BP	RNA splicing, via transesterification reactions	GO:0000375	1.66643e-10	9.77821	363	20	SNRPD1,RBM3,FUS,HNRNPUL1,SF3B2,YBX1,WTAP,NUDT21,TRA2B,SNRPN,SRSF12,SRSF6,RBMX,HNRNPA3,HNRNPD,HSPA8,SNRPD3,MFAP1,RBM14,HNRNPF
GO:BP	mRNA processing	GO:0006397	3.17141e-10	9.49875	532	23	SNRPD1,RBM3,FUS,HNRNPUL1,SF3B2,YBX1,CPSF6,ZC3H13,WTAP,NUDT21,AKAP8L,TRA2B,SNRPN,SRSF12,SRSF6,RBMX,HNRNPA3,HNRNPD,HSPA8,SNRPD3,MFAP1,RBM14,HNRNPF
GO:BP	protein targeting to ER	GO:0045047	3.41796e-10	9.46623	111	13	CHMP4B,RPS8,RPL34,RPL18A,RPS6,RPL7A,RPL11,RPS27A,RPL13,RPL24,RPL23A,RPS20,RPS9
GO:BP	protein localization to endoplasmic reticulum	GO:0070972	5.26236e-10	9.27882	144	14	CHMP4B,RPS8,RPL34,RPL18A,RPS6,RPL7A,GJA1,RPL11,RPS27A,RPL13,RPL24,RPL23A,RPS20,RPS9
GO:BP	establishment of protein localization to endoplasmic reticulum	GO:0072599	5.44701e-10	9.26384	115	13	CHMP4B,RPS8,RPL34,RPL18A,RPS6,RPL7A,RPL11,RPS27A,RPL13,RPL24,RPL23A,RPS20,RPS9
GO:BP	mRNA catabolic process	GO:0006402	5.77347e-10	9.23856	388	20	RPS8,RPL34,FUS,RPL18A,RPS6,RPL7A,YBX1,MOV10,RPL11,YBX3,YWHAZ,RPS27A,HNRNPD,HSPA8,RPL13,RPL24,RPL23A,RPS20,HSPA1B,RPS9
GO:BP	SRP-dependent cotranslational protein targeting to membrane	GO:0006614	1.36792e-09	8.86394	96	12	RPS8,RPL34,RPL18A,RPS6,RPL7A,RPL11,RPS27A,RPL13,RPL24,RPL23A,RPS20,RPS9
GO:BP	cotranslational protein targeting to membrane	GO:0006613	2.86809e-09	8.54241	102	12	RPS8,RPL34,RPL18A,RPS6,RPL7A,RPL11,RPS27A,RPL13,RPL24,RPL23A,RPS20,RPS9
GO:BP	RNA catabolic process	GO:0006401	4.01061e-09	8.39679	431	20	RPS8,RPL34,FUS,RPL18A,RPS6,RPL7A,YBX1,MOV10,RPL11,YBX3,YWHAZ,RPS27A,HNRNPD,HSPA8,RPL13,RPL24,RPL23A,RPS20,HSPA1B,RPS9
GO:BP	nucleobase-containing compound catabolic process	GO:0034655	1.19623e-08	7.92218	573	22	RPS8,RPL34,FUS,RPL18A,RPS6,RPL7A,YBX1,MOV10,RPL11,PDE4C,YBX3,YWHAZ,RPS27A,PDE4D,HNRNPD,HSPA8,RPL13,RPL24,RPL23A,RPS20,HSPA1B,RPS9
GO:BP	viral transcription	GO:0019083	1.22612e-08	7.91147	181	14	RPS8,RPL34,RPL18A,RPS6,RPL7A,NUP205,RPL11,RPS27A,RPL13,RPL24,RPL23A,RPS20,RPS9,TRIM21
GO:BP	cytoplasmic translation	GO:0002181	1.56407e-08	7.80574	149	13	RPS8,RPL34,RPL18A,RPS6,RPL7A,RPL11,YBX3,RPS27A,RPL13,RPL24,RPL23A,RPS20,RPS9
GO:BP	nuclear-transcribed mRNA catabolic process, nonsense-mediated decay	GO:0000184	2.73934e-08	7.56235	123	12	RPS8,RPL34,RPL18A,RPS6,RPL7A,RPL11,RPS27A,RPL13,RPL24,RPL23A,RPS20,RPS9
GO:BP	heterocycle catabolic process	GO:0046700	5.04751e-08	7.29692	617	22	RPS8,RPL34,FUS,RPL18A,RPS6,RPL7A,YBX1,MOV10,RPL11,PDE4C,YBX3,YWHAZ,RPS27A,PDE4D,HNRNPD,HSPA8,RPL13,RPL24,RPL23A,RPS20,HSPA1B,RPS9
GO:BP	cellular nitrogen compound catabolic process	GO:0044270	6.08495e-08	7.21574	623	22	RPS8,RPL34,FUS,RPL18A,RPS6,RPL7A,YBX1,MOV10,RPL11,PDE4C,YBX3,YWHAZ,RPS27A,PDE4D,HNRNPD,HSPA8,RPL13,RPL24,RPL23A,RPS20,HSPA1B,RPS9
GO:BP	nucleobase-containing compound metabolic process	GO:0006139	6.28788e-08	7.2015	5752	70	AIMP1,RPS8,SNRPD1,RBM3,RPL34,PDX1,FUS,RPL18A,RPS6,GAPDH,RPL7A,HNRNPUL1,SF3B2,LMNA,YBX1,CPSF6,SAPS3,NUP205,ZC3H13,WTAP,MOV10,RIPK2,TAX1BP1,ADSL,TJP2,NUDT21,AKAP8L,GJA1,RPL11,TRA2B,PDE4C,SNRPN,SRSF12,CGGBP1,YBX3,CBS,AIMP2,DDB1,YWHAZ,CCT4,SRSF6,TXN,HMGN1,TPI1,RPS27A,JUP,PPIA,RBMX,HNRNPAB,PDE4D,HNRNPA3,HNRNPD,HSPA8,CBLL1,DLAT,RPL13,CYR61,ILF2,RPL24,SNRPD3,RPL23A,RPS20,HSPA1B,MFAP1,RBM14,RPS9,HNRNPF,R…
GO:BP	aromatic compound catabolic process	GO:0019439	9.05757e-08	7.04299	636	22	RPS8,RPL34,FUS,RPL18A,RPS6,RPL7A,YBX1,MOV10,RPL11,PDE4C,YBX3,YWHAZ,RPS27A,PDE4D,HNRNPD,HSPA8,RPL13,RPL24,RPL23A,RPS20,HSPA1B,RPS9
GO:BP	establishment of protein localization to organelle	GO:0072594	1.31434e-07	6.88129	523	20	CHMP4B,RPS8,RPL34,RPL18A,RPS6,RPL7A,LMNA,PEX5,RPL11,YWHAZ,CCT4,RPS27A,JUP,HSPA8,RPL13,RPL24,RPL23A,RPS20,RPS9,SLC25A6
GO:BP	protein targeting to membrane	GO:0006612	1.59256e-07	6.7979	219	14	CHMP4B,RPS8,RPL34,RPL18A,RPS6,RPL7A,PEX5,RPL11,RPS27A,RPL13,RPL24,RPL23A,RPS20,RPS9
GO:BP	ribonucleoprotein complex biogenesis	GO:0022613	1.80366e-07	6.74385	473	19	RPS8,SNRPD1,RPL34,RPL18A,RPS6,RPL7A,CPSF6,NUDT21,RPL11,RPS27L,SRSF12,SRSF6,DDX31,RPL13,RPL24,SNRPD3,RPL23A,RPS9,RSL1D1
GO:BP	organic cyclic compound catabolic process	GO:1901361	2.06653e-07	6.68476	664	22	RPS8,RPL34,FUS,RPL18A,RPS6,RPL7A,YBX1,MOV10,RPL11,PDE4C,YBX3,YWHAZ,RPS27A,PDE4D,HNRNPD,HSPA8,RPL13,RPL24,RPL23A,RPS20,HSPA1B,RPS9
GO:BP	intracellular transport	GO:0046907	2.57048e-07	6.58999	1723	35	CHMP4B,RPS8,ANKRD50,DENND1A,SNRPD1,RPL34,RPL18A,RPS6,CHMP5,RPL7A,LMNA,IFT20,CPSF6,SAPS3,NUP205,SPAG9,PEX5,TBC1D4,AKAP8L,RPL11,TUBB,YWHAZ,SRSF6,TXN,PCM1,RPS27A,JUP,HSPA8,RPL13,RPL24,SNRPD3,RPL23A,RPS20,RPS9,SLC25A6
GO:BP	heterocycle metabolic process	GO:0046483	2.90619e-07	6.53668	5929	70	AIMP1,RPS8,SNRPD1,RBM3,RPL34,PDX1,FUS,RPL18A,RPS6,GAPDH,RPL7A,HNRNPUL1,SF3B2,LMNA,YBX1,CPSF6,SAPS3,NUP205,ZC3H13,WTAP,MOV10,RIPK2,TAX1BP1,ADSL,TJP2,NUDT21,AKAP8L,GJA1,RPL11,TRA2B,PDE4C,SNRPN,SRSF12,CGGBP1,YBX3,CBS,AIMP2,DDB1,YWHAZ,CCT4,SRSF6,TXN,HMGN1,TPI1,RPS27A,JUP,PPIA,RBMX,HNRNPAB,PDE4D,HNRNPA3,HNRNPD,HSPA8,CBLL1,DLAT,RPL13,CYR61,ILF2,RPL24,SNRPD3,RPL23A,RPS20,HSPA1B,MFAP1,RBM14,RPS9,HNRNPF,R…
GO:BP	protein localization to organelle	GO:0033365	3.69657e-07	6.4322	974	26	CHMP4B,RPS8,RPL34,RPL18A,RPS6,RPL7A,LMNA,YBX1,IFT20,CCDC47,PEX5,GJA1,RPL11,YWHAZ,CCT4,TXN,PCM1,RPS27A,JUP,HSPA8,RPL13,RPL24,RPL23A,RPS20,RPS9,SLC25A6
GO:BP	cellular aromatic compound metabolic process	GO:0006725	4.2045e-07	6.37629	5973	70	AIMP1,RPS8,SNRPD1,RBM3,RPL34,PDX1,FUS,RPL18A,RPS6,GAPDH,RPL7A,HNRNPUL1,SF3B2,LMNA,YBX1,CPSF6,SAPS3,NUP205,ZC3H13,WTAP,MOV10,RIPK2,TAX1BP1,ADSL,TJP2,NUDT21,AKAP8L,GJA1,RPL11,TRA2B,PDE4C,SNRPN,SRSF12,CGGBP1,YBX3,CBS,AIMP2,DDB1,YWHAZ,CCT4,SRSF6,TXN,HMGN1,TPI1,RPS27A,JUP,PPIA,RBMX,HNRNPAB,PDE4D,HNRNPA3,HNRNPD,HSPA8,CBLL1,DLAT,RPL13,CYR61,ILF2,RPL24,SNRPD3,RPL23A,RPS20,HSPA1B,MFAP1,RBM14,RPS9,HNRNPF,R…
GO:BP	establishment of localization in cell	GO:0051649	4.21714e-07	6.37498	2778	45	CHMP4B,RPS8,ANKRD50,DENND1A,SNRPD1,RPL34,PDX1,RPL18A,RPS6,CHMP5,RPL7A,LMNA,IFT20,CPSF6,SAPS3,TMX3,NUP205,SPAG9,PEX5,TBC1D4,AKAP8L,GJA1,RPL11,TUBB,YWHAZ,SRSF6,TXN,PCM1,MAP4,RPS27A,DSP,JUP,PPIA,PDE4D,CFL1,HSPA8,RPL13,ILF2,RPL24,SNRPD3,RPL23A,RPS20,HSPA1B,RPS9,SLC25A6
GO:BP	viral gene expression	GO:0019080	4.53322e-07	6.34359	237	14	RPS8,RPL34,RPL18A,RPS6,RPL7A,NUP205,RPL11,RPS27A,RPL13,RPL24,RPL23A,RPS20,RPS9,TRIM21
GO:BP	protein targeting	GO:0006605	8.14335e-07	6.0892	400	17	CHMP4B,RPS8,RPL34,RPL18A,RPS6,RPL7A,PEX5,RPL11,YWHAZ,RPS27A,HSPA8,RPL13,RPL24,RPL23A,RPS20,RPS9,SLC25A6
GO:BP	viral process	GO:0016032	8.24536e-07	6.08379	1011	26	CHMP4B,RPS8,RPL34,RPL18A,RPS6,CHMP5,RPL7A,SF3B2,NUP205,MOV10,AKAP8L,RPL11,DDB1,RPS27A,PPIA,CFL1,HSPA8,RPL13,RPL24,TUFM,RPL23A,RPS20,HSPA1B,RPS9,SLC25A6,TRIM21
GO:BP	cellular component biogenesis	GO:0044085	2.05552e-06	5.68708	3377	49	CHMP4B,RPS8,SNRPD1,PDLIM5,RPL34,FUS,RPL18A,RPS6,CHMP5,RPL7A,CALD1,LMNA,IFT20,CPSF6,SAPS3,NUP205,PEX5,TJP1,CGNL1,NUDT21,GJA1,RPL11,RPS27L,TUBB,SRSF12,AIMP2,DDB1,YWHAZ,SRSF6,PCM1,DNAH8,MAP4,MYH11,RPS27A,JUP,TPM1,DBN1,RBMX,HSPA8,DDX31,RPL13,CYR61,RPL24,SNRPD3,RPL23A,HSPA1B,RBM14,RPS9,RSL1D1
GO:BP	organic cyclic compound metabolic process	GO:1901360	3.26058e-06	5.48671	6227	70	AIMP1,RPS8,SNRPD1,RBM3,RPL34,PDX1,FUS,RPL18A,RPS6,GAPDH,RPL7A,HNRNPUL1,SF3B2,LMNA,YBX1,CPSF6,SAPS3,NUP205,ZC3H13,WTAP,MOV10,RIPK2,TAX1BP1,ADSL,TJP2,NUDT21,AKAP8L,GJA1,RPL11,TRA2B,PDE4C,SNRPN,SRSF12,CGGBP1,YBX3,CBS,AIMP2,DDB1,YWHAZ,CCT4,SRSF6,TXN,HMGN1,TPI1,RPS27A,JUP,PPIA,RBMX,HNRNPAB,PDE4D,HNRNPA3,HNRNPD,HSPA8,CBLL1,DLAT,RPL13,CYR61,ILF2,RPL24,SNRPD3,RPL23A,RPS20,HSPA1B,MFAP1,RBM14,RPS9,HNRNPF,R…
GO:BP	regulation of mRNA metabolic process	GO:1903311	3.68724e-06	5.4333	384	16	RBM3,FUS,YBX1,CPSF6,WTAP,MOV10,NUDT21,TRA2B,SRSF12,YBX3,YWHAZ,SRSF6,RPS27A,RBMX,HNRNPD,HSPA8
GO:BP	establishment of protein localization to membrane	GO:0090150	3.82749e-06	5.41709	385	16	CHMP4B,RPS8,RPL34,RPL18A,RPS6,RPL7A,CCDC47,PEX5,RPL11,YWHAZ,RPS27A,RPL13,RPL24,RPL23A,RPS20,RPS9
GO:BP	cellular nitrogen compound metabolic process	GO:0034641	4.75994e-06	5.3224	6576	72	AIMP1,RPS8,SNRPD1,RBM3,RPL34,PDX1,FUS,RPL18A,RPS6,GAPDH,RPL7A,HNRNPUL1,SF3B2,LMNA,YBX1,CPSF6,SAPS3,NUP205,ZC3H13,WTAP,MOV10,RIPK2,TAX1BP1,ADSL,TJP2,NUDT21,AKAP8L,GJA1,RPL11,TRA2B,PDE4C,SNRPN,RPS27L,SRSF12,CGGBP1,YBX3,CBS,AIMP2,DDB1,YWHAZ,CCT4,SRSF6,TXN,HMGN1,TPI1,RPS27A,JUP,PPIA,RBMX,HNRNPAB,PDE4D,HNRNPA3,HNRNPD,HSPA8,CBLL1,DLAT,RPL13,CYR61,ILF2,RPL24,SNRPD3,TUFM,RPL23A,RPS20,HSPA1B,MFAP1,RBM14,R…
GO:BP	translation	GO:0006412	7.37732e-06	5.1321	804	22	AIMP1,RPS8,RBM3,RPL34,RPL18A,RPS6,GAPDH,RPL7A,YBX1,MOV10,RPL11,RPS27L,YBX3,AIMP2,RPS27A,HNRNPD,RPL13,RPL24,TUFM,RPL23A,RPS20,RPS9
GO:BP	cellular localization	GO:0051641	8.61365e-06	5.06481	3519	49	CHMP4B,RPS8,ANKRD50,DENND1A,SNRPD1,RPL34,PDX1,RPL18A,RPS6,CHMP5,RPL7A,LMNA,YBX1,IFT20,CPSF6,SAPS3,TMX3,NUP205,SPAG9,CCDC47,PEX5,TBC1D4,AKAP8L,GJA1,RPL11,TUBB,YWHAZ,CCT4,SRSF6,TXN,PCM1,MAP4,RPS27A,DSP,JUP,DBN1,PPIA,PDE4D,CFL1,HSPA8,RPL13,ILF2,RPL24,SNRPD3,RPL23A,RPS20,HSPA1B,RPS9,SLC25A6
GO:BP	translational initiation	GO:0006413	9.23924e-06	5.03436	203	12	RPS8,RPL34,RPL18A,RPS6,RPL7A,RPL11,RPS27A,RPL13,RPL24,RPL23A,RPS20,RPS9
GO:BP	amide biosynthetic process	GO:0043604	1.034e-05	4.98548	975	24	AIMP1,RPS8,RBM3,RPL34,RPL18A,RPS6,GAPDH,RPL7A,YBX1,MOV10,RPL11,RPS27L,YBX3,AIMP2,RPS27A,HNRNPD,DLAT,RPL13,CYR61,RPL24,TUFM,RPL23A,RPS20,RPS9
GO:BP	nucleic acid metabolic process	GO:0090304	1.09684e-05	4.95986	5234	62	AIMP1,RPS8,SNRPD1,RBM3,RPL34,PDX1,FUS,RPL18A,RPS6,RPL7A,HNRNPUL1,SF3B2,LMNA,YBX1,CPSF6,SAPS3,ZC3H13,WTAP,MOV10,RIPK2,TAX1BP1,NUDT21,AKAP8L,GJA1,RPL11,TRA2B,SNRPN,SRSF12,CGGBP1,YBX3,CBS,AIMP2,DDB1,YWHAZ,CCT4,SRSF6,TXN,HMGN1,RPS27A,JUP,PPIA,RBMX,HNRNPAB,HNRNPA3,HNRNPD,HSPA8,CBLL1,RPL13,CYR61,ILF2,RPL24,SNRPD3,RPL23A,RPS20,HSPA1B,MFAP1,RBM14,RPS9,HNRNPF,RSL1D1,BTF3,TRIM21
GO:BP	peptide biosynthetic process	GO:0043043	1.43722e-05	4.84248	834	22	AIMP1,RPS8,RBM3,RPL34,RPL18A,RPS6,GAPDH,RPL7A,YBX1,MOV10,RPL11,RPS27L,YBX3,AIMP2,RPS27A,HNRNPD,RPL13,RPL24,TUFM,RPL23A,RPS20,RPS9
GO:BP	nitrogen compound transport	GO:0071705	1.56052e-05	4.80673	2216	37	AIMP1,CHMP4B,RPS8,ANKRD50,DENND1A,RPL34,PDX1,RPL18A,RPS6,CHMP5,RPL7A,LMNA,YBX1,IFT20,CPSF6,NUP205,PEX5,TBC1D4,AKAP8L,GJA1,RPL11,YWHAZ,SRSF6,TXN,PCM1,RPS27A,JUP,PPIA,HNRNPA3,HSPA8,RPL13,RPL24,RPL23A,RPS20,RPS9,SLC25A6,BTF3
GO:BP	nuclear-transcribed mRNA catabolic process	GO:0000956	1.6728e-05	4.77656	214	12	RPS8,RPL34,RPL18A,RPS6,RPL7A,RPL11,RPS27A,RPL13,RPL24,RPL23A,RPS20,RPS9
GO:BP	protein localization	GO:0008104	1.9894e-05	4.70128	2670	41	CHMP4B,RPS8,ANKRD50,DENND1A,RPL34,PDX1,RPL18A,RPS6,CHMP5,RPL7A,LMNA,YBX1,IFT20,NUP205,CCDC47,PEX5,TJP2,TBC1D4,TJP1,CGNL1,GJA1,RPL11,YWHAZ,CCT4,TXN,PCM1,RPS27A,DSP,JUP,DBN1,PPIA,HSPA8,RPL13,RPL24,RPL23A,RPS20,RPS9,SLC25A6,RSL1D1,BTF3,TRIM21
GO:BP	macromolecule localization	GO:0033036	2.45441e-05	4.61005	3148	45	CHMP4B,RPS8,ANKRD50,DENND1A,RPL34,PDX1,RPL18A,RPS6,CHMP5,RPL7A,LMNA,YBX1,IFT20,CPSF6,NUP205,CCDC47,PEX5,TJP2,TBC1D4,TJP1,CGNL1,AKAP8L,GJA1,RPL11,YWHAZ,CCT4,SRSF6,TXN,PCM1,RPS27A,DSP,JUP,DBN1,PPIA,HNRNPA3,HSPA8,RPL13,RPL24,RPL23A,RPS20,RPS9,SLC25A6,RSL1D1,BTF3,TRIM21
GO:BP	establishment of protein localization	GO:0045184	3.36099e-05	4.47353	1866	33	CHMP4B,RPS8,ANKRD50,DENND1A,RPL34,PDX1,RPL18A,RPS6,CHMP5,RPL7A,LMNA,IFT20,NUP205,CCDC47,PEX5,TBC1D4,GJA1,RPL11,YWHAZ,CCT4,TXN,PCM1,RPS27A,JUP,PPIA,HSPA8,RPL13,RPL24,RPL23A,RPS20,RPS9,SLC25A6,BTF3
GO:BP	protein transport	GO:0015031	0.000106127	3.97417	1754	31	CHMP4B,RPS8,ANKRD50,DENND1A,RPL34,PDX1,RPL18A,RPS6,CHMP5,RPL7A,LMNA,IFT20,NUP205,PEX5,TBC1D4,GJA1,RPL11,YWHAZ,TXN,PCM1,RPS27A,JUP,PPIA,HSPA8,RPL13,RPL24,RPL23A,RPS20,RPS9,SLC25A6,BTF3
GO:BP	localization within membrane	GO:0051668	0.000108812	3.96332	775	20	CHMP4B,RPS8,ANKRD50,DENND1A,RPL34,RPL18A,RPS6,RPL7A,IFT20,CCDC47,PEX5,RPL11,YWHAZ,RPS27A,JUP,RPL13,RPL24,RPL23A,RPS20,RPS9
GO:BP	RNA metabolic process	GO:0016070	0.000118082	3.92782	4714	56	AIMP1,RPS8,SNRPD1,RBM3,RPL34,PDX1,FUS,RPL18A,RPS6,RPL7A,HNRNPUL1,SF3B2,YBX1,CPSF6,ZC3H13,WTAP,MOV10,RIPK2,TAX1BP1,NUDT21,AKAP8L,RPL11,TRA2B,SNRPN,SRSF12,CGGBP1,YBX3,AIMP2,YWHAZ,SRSF6,TXN,HMGN1,RPS27A,JUP,PPIA,RBMX,HNRNPAB,HNRNPA3,HNRNPD,HSPA8,CBLL1,RPL13,CYR61,ILF2,RPL24,SNRPD3,RPL23A,RPS20,HSPA1B,MFAP1,RBM14,RPS9,HNRNPF,RSL1D1,BTF3,TRIM21
GO:BP	cellular component organization or biogenesis	GO:0071840	0.000124653	3.9043	6880	71	CHMP4B,RPS8,SNRPD1,PDLIM5,RPL34,FUS,RPL18A,RPS6,CHMP5,GAPDH,RPL7A,CALD1,LMNA,IFT20,CPSF6,SAPS3,NUP205,TACC3,INF2,MOV10,SPAG9,FBLN2,CCDC47,PEX5,TJP2,TBC1D4,TJP1,CGNL1,NUDT21,AKAP8L,GJA1,RPL11,RPS27L,TUBB,SRSF12,CCDC6,AIMP2,DDB1,YWHAZ,CCT4,SRSF6,PCM1,DNAH8,HMGN1,MAP4,MYH11,RPS27A,DSP,JUP,TPM1,TPM4,TPM3,DBN1,TACC2,PPIA,RBMX,HNRNPD,CFL1,HSPA8,DDX31,CBLL1,RPL13,CYR61,RPL24,SNRPD3,RPL23A,HSPA1B,RBM14,R…
GO:BP	actin-mediated cell contraction	GO:0070252	0.000124854	3.9036	122	9	GJA1,DSP,JUP,TPM1,TPM4,TPM3,MYL1,MYL6,PDE4D
GO:BP	ribosome biogenesis	GO:0042254	0.000303805	3.51741	335	13	RPS8,RPL34,RPL18A,RPS6,RPL7A,RPL11,RPS27L,DDX31,RPL13,RPL24,RPL23A,RPS9,RSL1D1
GO:BP	intracellular protein transport	GO:0006886	0.000326418	3.48623	995	22	CHMP4B,RPS8,RPL34,RPL18A,RPS6,RPL7A,LMNA,PEX5,TBC1D4,RPL11,YWHAZ,TXN,PCM1,RPS27A,JUP,HSPA8,RPL13,RPL24,RPL23A,RPS20,RPS9,SLC25A6
GO:BP	peptide metabolic process	GO:0006518	0.000343798	3.4637	998	22	AIMP1,RPS8,RBM3,RPL34,RPL18A,RPS6,GAPDH,RPL7A,YBX1,MOV10,RPL11,RPS27L,YBX3,AIMP2,RPS27A,HNRNPD,RPL13,RPL24,TUFM,RPL23A,RPS20,RPS9
GO:BP	protein localization to membrane	GO:0072657	0.000547684	3.26147	698	18	CHMP4B,RPS8,RPL34,RPL18A,RPS6,RPL7A,IFT20,CCDC47,PEX5,RPL11,YWHAZ,RPS27A,JUP,RPL13,RPL24,RPL23A,RPS20,RPS9
GO:BP	regulation of mRNA processing	GO:0050684	0.000550812	3.259	145	9	RBM3,CPSF6,WTAP,NUDT21,TRA2B,SRSF12,SRSF6,RBMX,HSPA8
GO:BP	ribonucleoprotein complex assembly	GO:0022618	0.000734411	3.13406	196	10	SNRPD1,CPSF6,NUDT21,RPL11,RPS27L,SRSF12,SRSF6,RPL24,SNRPD3,RPL23A
GO:BP	actin filament-based movement	GO:0030048	0.000777054	3.10955	151	9	GJA1,DSP,JUP,TPM1,TPM4,TPM3,MYL1,MYL6,PDE4D
GO:BP	regulation of RNA splicing	GO:0043484	0.000821695	3.08529	152	9	RBM3,FUS,WTAP,TRA2B,SRSF12,SRSF6,RBMX,HSPA8,HNRNPF
GO:BP	cellular macromolecule catabolic process	GO:0044265	0.00100245	2.99894	1244	24	CHMP4B,RPS8,RPL34,FUS,RPL18A,RPS6,RPL7A,YBX1,SAPS3,MOV10,CCDC47,RPL11,YBX3,DDB1,YWHAZ,RPS27A,HNRNPD,HSPA8,RPL13,RPL24,RPL23A,RPS20,HSPA1B,RPS9
GO:BP	ribonucleoprotein complex subunit organization	GO:0071826	0.0010142	2.99388	203	10	SNRPD1,CPSF6,NUDT21,RPL11,RPS27L,SRSF12,SRSF6,RPL24,SNRPD3,RPL23A
GO:BP	rRNA processing	GO:0006364	0.00147777	2.83039	265	11	RPS8,RPL34,RPL18A,RPS6,RPL7A,RPL11,RPL13,RPL24,RPL23A,RPS9,RSL1D1
GO:BP	negative regulation of gene expression	GO:0010629	0.00161776	2.79109	1470	26	RPS8,RPL34,FUS,RPL18A,RPS6,GAPDH,RPL7A,YBX1,NUP205,MOV10,TAX1BP1,RPL11,SRSF12,YBX3,YWHAZ,SRSF6,RPS27A,RBMX,HNRNPD,HSPA8,RPL13,RPL24,RPL23A,RPS20,HSPA1B,RPS9
GO:BP	cytoskeleton organization	GO:0007010	0.00168141	2.77433	1473	26	CHMP4B,PDLIM5,CHMP5,GAPDH,CALD1,LMNA,TACC3,INF2,TJP1,CGNL1,GJA1,TUBB,CCDC6,PCM1,DNAH8,MAP4,MYH11,DSP,TPM1,TPM4,TPM3,DBN1,TACC2,CFL1,HSPA1B,RBM14
GO:BP	organic substance transport	GO:0071702	0.0017396	2.75955	2657	37	AIMP1,CHMP4B,RPS8,ANKRD50,DENND1A,RPL34,PDX1,RPL18A,RPS6,CHMP5,RPL7A,LMNA,YBX1,IFT20,CPSF6,NUP205,PEX5,TBC1D4,AKAP8L,GJA1,RPL11,YWHAZ,SRSF6,TXN,PCM1,RPS27A,JUP,PPIA,HNRNPA3,HSPA8,RPL13,RPL24,RPL23A,RPS20,RPS9,SLC25A6,BTF3
GO:BP	cellular amide metabolic process	GO:0043603	0.00176672	2.75283	1284	24	AIMP1,RPS8,RBM3,RPL34,RPL18A,RPS6,GAPDH,RPL7A,YBX1,MOV10,RPL11,RPS27L,YBX3,AIMP2,RPS27A,HNRNPD,DLAT,RPL13,CYR61,RPL24,TUFM,RPL23A,RPS20,RPS9
GO:BP	rRNA metabolic process	GO:0016072	0.00212514	2.67261	275	11	RPS8,RPL34,RPL18A,RPS6,RPL7A,RPL11,RPL13,RPL24,RPL23A,RPS9,RSL1D1
GO:BP	cellular catabolic process	GO:0044248	0.00327454	2.48485	2381	34	CHMP4B,RPS8,RPL34,FUS,RPL18A,RPS6,GAPDH,RPL7A,YBX1,IFT20,SAPS3,MOV10,RIPK2,CCDC47,PEX5,PGAM5,RPL11,PDE4C,YBX3,CBS,DDB1,YWHAZ,TPI1,RPS27A,PDE4D,HNRNPD,HSPA8,RPL13,RPL24,RPL23A,RPS20,HSPA1B,RPS9,TRIM21
GO:BP	negative regulation of mRNA metabolic process	GO:1903312	0.00381459	2.41855	95	7	FUS,YBX1,SRSF12,YBX3,SRSF6,RBMX,HNRNPD
GO:BP	positive regulation of mRNA processing	GO:0050685	0.00430469	2.36606	35	5	RBM3,NUDT21,TRA2B,RBMX,HSPA8
GO:BP	macromolecule catabolic process	GO:0009057	0.00622732	2.2057	1479	25	CHMP4B,RPS8,RPL34,FUS,RPL18A,RPS6,RPL7A,YBX1,SAPS3,MOV10,CCDC47,GJA1,RPL11,YBX3,DDB1,YWHAZ,RPS27A,HNRNPD,HSPA8,RPL13,RPL24,RPL23A,RPS20,HSPA1B,RPS9
GO:BP	actin-myosin filament sliding	GO:0033275	0.00748454	2.12583	39	5	TPM1,TPM4,TPM3,MYL1,MYL6
GO:BP	muscle filament sliding	GO:0030049	0.00748454	2.12583	39	5	TPM1,TPM4,TPM3,MYL1,MYL6
GO:BP	regulation of mRNA splicing, via spliceosome	GO:0048024	0.00846574	2.07233	107	7	RBM3,WTAP,TRA2B,SRSF12,SRSF6,RBMX,HSPA8
GO:BP	gene expression	GO:0010467	0.00862976	2.064	6192	62	AIMP1,RPS8,SNRPD1,RBM3,RPL34,PDX1,FUS,RPL18A,RPS6,GAPDH,RPL7A,HNRNPUL1,SF3B2,LMNA,YBX1,CPSF6,NUP205,ZC3H13,WTAP,MOV10,RIPK2,TAX1BP1,NUDT21,AKAP8L,GJA1,RPL11,TRA2B,SNRPN,RPS27L,SRSF12,CGGBP1,YBX3,AIMP2,YWHAZ,SRSF6,TXN,HMGN1,RPS27A,JUP,PPIA,RBMX,HNRNPAB,PDE4D,HNRNPA3,HNRNPD,HSPA8,RPL13,CYR61,ILF2,RPL24,SNRPD3,TUFM,RPL23A,RPS20,HSPA1B,MFAP1,RBM14,RPS9,HNRNPF,RSL1D1,BTF3,TRIM21
GO:BP	cellular component assembly	GO:0022607	0.0104424	1.9812	3104	39	CHMP4B,SNRPD1,PDLIM5,FUS,CHMP5,CALD1,LMNA,IFT20,CPSF6,SAPS3,NUP205,PEX5,TJP1,CGNL1,NUDT21,GJA1,RPL11,RPS27L,TUBB,SRSF12,AIMP2,DDB1,YWHAZ,SRSF6,PCM1,DNAH8,MAP4,MYH11,RPS27A,JUP,TPM1,DBN1,RBMX,HSPA8,RPL24,SNRPD3,RPL23A,HSPA1B,RBM14
GO:BP	cellular protein localization	GO:0034613	0.0110385	1.95709	1842	28	CHMP4B,RPS8,RPL34,RPL18A,RPS6,RPL7A,LMNA,YBX1,IFT20,CCDC47,PEX5,TBC1D4,GJA1,RPL11,YWHAZ,CCT4,TXN,PCM1,RPS27A,JUP,DBN1,HSPA8,RPL13,RPL24,RPL23A,RPS20,RPS9,SLC25A6
GO:BP	organic substance catabolic process	GO:1901575	0.0115929	1.93581	2289	32	CHMP4B,RPS8,RPL34,FUS,RPL18A,RPS6,GAPDH,RPL7A,YBX1,SAPS3,NUP205,MOV10,CCDC47,PEX5,GJA1,RPL11,PDE4C,YBX3,CBS,DDB1,YWHAZ,TPI1,RPS27A,PDE4D,HNRNPD,HSPA8,RPL13,RPL24,RPL23A,RPS20,HSPA1B,RPS9
GO:BP	cellular macromolecule localization	GO:0070727	0.012751	1.89445	1856	28	CHMP4B,RPS8,RPL34,RPL18A,RPS6,RPL7A,LMNA,YBX1,IFT20,CCDC47,PEX5,TBC1D4,GJA1,RPL11,YWHAZ,CCT4,TXN,PCM1,RPS27A,JUP,DBN1,HSPA8,RPL13,RPL24,RPL23A,RPS20,RPS9,SLC25A6
GO:BP	muscle system process	GO:0003012	0.0134901	1.86998	471	13	PDLIM5,CALD1,LMNA,GJA1,MYH11,DSP,JUP,TPM1,TPM4,TPM3,MYL1,MYL6,PDE4D
GO:BP	catabolic process	GO:0009056	0.0142266	1.8469	2779	36	CHMP4B,RPS8,RPL34,FUS,RPL18A,RPS6,GAPDH,RPL7A,YBX1,IFT20,SAPS3,NUP205,MOV10,RIPK2,CCDC47,PEX5,PGAM5,GJA1,RPL11,PDE4C,YBX3,CBS,DDB1,YWHAZ,TPI1,RPS27A,PDE4D,HNRNPD,HSPA8,RPL13,RPL24,RPL23A,RPS20,HSPA1B,RPS9,TRIM21
GO:BP	protein localization to cell-cell junction	GO:0150105	0.0171633	1.7654	22	4	TJP2,TJP1,CGNL1,DSP
GO:BP	actin filament-based process	GO:0030029	0.0192552	1.71545	810	17	PDLIM5,CALD1,INF2,TJP1,CGNL1,GJA1,MYH11,DSP,JUP,TPM1,TPM4,TPM3,DBN1,MYL1,MYL6,PDE4D,CFL1
GO:BP	positive regulation of mRNA splicing, via spliceosome	GO:0048026	0.0292556	1.53379	25	4	RBM3,TRA2B,RBMX,HSPA8
GO:BP	muscle contraction	GO:0006936	0.0299819	1.52314	363	11	CALD1,GJA1,MYH11,DSP,JUP,TPM1,TPM4,TPM3,MYL1,MYL6,PDE4D
GO:CC	ribonucleoprotein complex	GO:1990904	1.77768e-23	22.7501	694	38	RPS8,SNRPD1,RBM3,RPL34,FUS,RPL18A,RPS6,GAPDH,RPL7A,SF3B2,YBX1,CPSF6,AKAP8L,RPL11,TRA2B,SNRPN,RPS27L,NUFIP2,RPS27A,RBMX,HNRNPAB,HNRNPA3,HNRNPD,HSPA8,RPL13,ILF2,RPL24,SNRPD3,RPL23A,RPS20,HSPA1B,MFAP1,RBM14,RPS9,HNRNPF,RSL1D1,BTF3,TRIM21
GO:CC	cytosolic ribosome	GO:0022626	3.11006e-11	10.5072	106	13	RPS8,RPL34,RPL18A,RPS6,RPL7A,RPL11,RPS27L,RPS27A,RPL13,RPL24,RPL23A,RPS20,RPS9
GO:CC	protein-containing complex	GO:0032991	1.19533e-10	9.92251	5541	72	AIMP1,CHMP4B,RPS8,SNRPD1,RBM3,PDLIM5,RPL34,FUS,RPL18A,RPS6,GAPDH,RPL7A,CGN,SF3B2,YBX1,IFT20,CPSF6,NUP205,ZC3H13,WTAP,RIPK2,PEX5,ADSL,TJP1,CGNL1,NUDT21,AKAP8L,GJA1,RPL11,TRA2B,SNRPN,RPS27L,TUBB,AIMP2,DDB1,CCT4,PCM1,DNAH8,NUFIP2,MAP4,MYH11,RPS27A,JUP,TPM1,TPM4,TPM3,MYL1,PPIA,MYL6,RBMX,HNRNPAB,PDE4D,HNRNPA3,HNRNPD,HSPA8,CBLL1,DLAT,RPL13,ILF2,RPL24,SNRPD3,RPL23A,RPS20,HSPA1B,MFAP1,RBM14,RPS9,SLC25A6,…
GO:CC	cytosol	GO:0005829	3.11555e-10	9.50647	5361	70	AIMP1,CHMP4B,RPS8,DENND1A,SNRPD1,PDLIM5,RPL34,PDX1,RPL18A,RPS6,CHMP5,GAPDH,RPL7A,CALD1,LMNA,YBX1,SAPS3,NUP205,TACC3,MOV10,SPAG9,RIPK2,TAX1BP1,PEX5,ADSL,TJP2,TBC1D4,TJP1,RPL11,PDE4C,RPS27L,TUBB,YBX3,CCDC6,CBS,AIMP2,YWHAZ,CCT4,TXN,PCM1,NUFIP2,TPI1,MAP4,MYH11,RPS27A,JUP,TPM1,TPM4,TPM3,DBN1,MYL1,TACC2,PPIA,MYL6,PDE4D,PCMT1,HNRNPD,CFL1,HSPA8,CBLL1,RPL13,RPL24,SNRPD3,RPL23A,RPS20,HSPA1B,RPS9,HNRNPF,BTF…
GO:CC	ribosome	GO:0005840	8.78587e-10	9.05622	247	16	RPS8,RBM3,RPL34,RPL18A,RPS6,RPL7A,RPL11,RPS27L,NUFIP2,RPS27A,RPL13,RPL24,RPL23A,RPS20,RPS9,BTF3
GO:CC	ribosomal subunit	GO:0044391	4.23847e-09	8.37279	191	14	RPS8,RBM3,RPL34,RPL18A,RPS6,RPL7A,RPL11,RPS27L,RPS27A,RPL13,RPL24,RPL23A,RPS20,RPS9
GO:CC	intracellular non-membrane-bounded organelle	GO:0043232	5.51702e-08	7.2583	5094	64	RPS8,RBM3,PDLIM5,RPL34,PDX1,RPL18A,RPS6,GAPDH,RPL7A,CALD1,CGN,LMNA,YBX1,IFT20,CPSF6,TACC3,MOV10,SPAG9,RIPK2,TJP1,CGNL1,NUDT21,AKAP8L,RPL11,RPS27L,TUBB,CCDC6,DDB1,CCT4,PCM1,DNAH8,HMGN1,NUFIP2,MAP4,MYH11,RPS27A,DSP,JUP,TPM1,TPM4,TPM3,DBN1,MYL1,TACC2,MYL6,RBMX,PDE4D,HNRNPA3,CFL1,HSPA8,DDX31,RPL13,ILF2,RPL24,TUFM,RPL23A,RPS20,HSPA1B,MFAP1,RBM14,RPS9,RSL1D1,BTF3,TRIM21
GO:CC	non-membrane-bounded organelle	GO:0043228	5.92477e-08	7.22733	5102	64	RPS8,RBM3,PDLIM5,RPL34,PDX1,RPL18A,RPS6,GAPDH,RPL7A,CALD1,CGN,LMNA,YBX1,IFT20,CPSF6,TACC3,MOV10,SPAG9,RIPK2,TJP1,CGNL1,NUDT21,AKAP8L,RPL11,RPS27L,TUBB,CCDC6,DDB1,CCT4,PCM1,DNAH8,HMGN1,NUFIP2,MAP4,MYH11,RPS27A,DSP,JUP,TPM1,TPM4,TPM3,DBN1,MYL1,TACC2,MYL6,RBMX,PDE4D,HNRNPA3,CFL1,HSPA8,DDX31,RPL13,ILF2,RPL24,TUFM,RPL23A,RPS20,HSPA1B,MFAP1,RBM14,RPS9,RSL1D1,BTF3,TRIM21
GO:CC	organelle	GO:0043226	1.49505e-07	6.82534	14027	112	AIMP1,CHMP4B,RPS8,ANKRD50,DENND1A,SNRPD1,RBM3,PDLIM5,RPL34,PDX1,FUS,RPL18A,RPS6,CHMP5,GAPDH,RPL7A,HNRNPUL1,CALD1,CGN,KPRP,ALYREF,SF3B2,LMNA,YBX1,IFT20,CPSF6,SAPS3,TMX3,NUP205,ZC3H13,TACC3,WTAP,MOV10,SPAG9,RIPK2,FBLN2,TAX1BP1,LUZP1,CCDC47,PEX5,TJP2,TBC1D4,TJP1,CGNL1,PGAM5,NUDT21,AKAP8L,GJA1,RPL11,TRA2B,PDE4C,SNRPN,RPS27L,TUBB,SRSF12,CGGBP1,YBX3,CCDC6,CBS,AIMP2,DDB1,YWHAZ,CCT4,SRSF6,TXN,PCM1,DNAH8,…
GO:CC	spliceosomal complex	GO:0005681	8.30851e-07	6.08048	192	12	SNRPD1,RBM3,SF3B2,YBX1,TRA2B,SNRPN,RBMX,HNRNPA3,HSPA8,SNRPD3,MFAP1,HNRNPF
GO:CC	nuclear lumen	GO:0031981	2.2518e-06	5.64747	4453	56	RPS8,DENND1A,SNRPD1,RBM3,PDX1,FUS,RPS6,RPL7A,HNRNPUL1,ALYREF,SF3B2,LMNA,YBX1,CPSF6,SAPS3,NUP205,ZC3H13,WTAP,TJP2,NUDT21,AKAP8L,GJA1,RPL11,TRA2B,SNRPN,SRSF12,CGGBP1,DDB1,YWHAZ,CCT4,SRSF6,TXN,HMGN1,NUFIP2,RPS27A,TACC2,RBMX,HNRNPAB,HNRNPA3,HNRNPD,CFL1,HSPA8,DDX31,CBLL1,RPL13,ILF2,SNRPD3,RPL23A,RPS20,HSPA1B,MFAP1,RBM14,RPS9,HNRNPF,RSL1D1,TRIM21
GO:CC	extracellular vesicle	GO:1903561	4.35969e-06	5.36054	2263	37	CHMP4B,RPS8,RPL34,CHMP5,GAPDH,KPRP,YBX1,SPAG9,FBLN2,TAX1BP1,LUZP1,RPL11,TUBB,DDB1,YWHAZ,CCT4,TXN,TPI1,MYH11,RPS27A,DSP,JUP,TPM4,TPM3,PPIA,MYL6,RBMX,PCMT1,CFL1,HSPA8,RPL24,TUFM,RPL23A,RPS20,SBSN,HSPA1B,RPS9
GO:CC	extracellular membrane-bounded organelle	GO:0065010	4.46438e-06	5.35024	2265	37	CHMP4B,RPS8,RPL34,CHMP5,GAPDH,KPRP,YBX1,SPAG9,FBLN2,TAX1BP1,LUZP1,RPL11,TUBB,DDB1,YWHAZ,CCT4,TXN,TPI1,MYH11,RPS27A,DSP,JUP,TPM4,TPM3,PPIA,MYL6,RBMX,PCMT1,CFL1,HSPA8,RPL24,TUFM,RPL23A,RPS20,SBSN,HSPA1B,RPS9
GO:CC	extracellular organelle	GO:0043230	4.46438e-06	5.35024	2265	37	CHMP4B,RPS8,RPL34,CHMP5,GAPDH,KPRP,YBX1,SPAG9,FBLN2,TAX1BP1,LUZP1,RPL11,TUBB,DDB1,YWHAZ,CCT4,TXN,TPI1,MYH11,RPS27A,DSP,JUP,TPM4,TPM3,PPIA,MYL6,RBMX,PCMT1,CFL1,HSPA8,RPL24,TUFM,RPL23A,RPS20,SBSN,HSPA1B,RPS9
GO:CC	polysome	GO:0005844	4.73204e-06	5.32495	72	8	FUS,RPL18A,RPS6,RPL7A,RPL11,NUFIP2,RPL24,BTF3
GO:CC	nucleus	GO:0005634	5.36643e-06	5.27031	7607	77	AIMP1,CHMP4B,RPS8,DENND1A,SNRPD1,RBM3,PDX1,FUS,RPS6,CHMP5,GAPDH,RPL7A,HNRNPUL1,ALYREF,SF3B2,LMNA,YBX1,CPSF6,SAPS3,NUP205,ZC3H13,WTAP,MOV10,LUZP1,TJP2,TJP1,NUDT21,AKAP8L,GJA1,RPL11,TRA2B,PDE4C,SNRPN,RPS27L,TUBB,SRSF12,CGGBP1,YBX3,CBS,AIMP2,DDB1,YWHAZ,CCT4,SRSF6,TXN,PCM1,HMGN1,NUFIP2,TPI1,RPS27A,DSP,JUP,TACC2,PPIA,RBMX,HNRNPAB,PDE4D,HNRNPA3,HNRNPD,CFL1,HSPA8,DDX31,CBLL1,RPL13,ILF2,SNRPD3,RPL23A,RPS…
GO:CC	extracellular exosome	GO:0070062	5.58519e-06	5.25296	2178	36	CHMP4B,RPS8,RPL34,CHMP5,GAPDH,KPRP,YBX1,SPAG9,TAX1BP1,LUZP1,RPL11,TUBB,DDB1,YWHAZ,CCT4,TXN,TPI1,MYH11,RPS27A,DSP,JUP,TPM4,TPM3,PPIA,MYL6,RBMX,PCMT1,CFL1,HSPA8,RPL24,TUFM,RPL23A,RPS20,SBSN,HSPA1B,RPS9
GO:CC	intracellular organelle	GO:0043229	8.84148e-06	5.05348	13117	106	AIMP1,CHMP4B,RPS8,ANKRD50,DENND1A,SNRPD1,RBM3,PDLIM5,RPL34,PDX1,FUS,RPL18A,RPS6,CHMP5,GAPDH,RPL7A,HNRNPUL1,CALD1,CGN,ALYREF,SF3B2,LMNA,YBX1,IFT20,CPSF6,SAPS3,TMX3,NUP205,ZC3H13,TACC3,WTAP,MOV10,SPAG9,RIPK2,LUZP1,CCDC47,PEX5,TJP2,TJP1,CGNL1,PGAM5,NUDT21,AKAP8L,GJA1,RPL11,TRA2B,PDE4C,SNRPN,RPS27L,TUBB,SRSF12,CGGBP1,YBX3,CCDC6,CBS,AIMP2,DDB1,YWHAZ,CCT4,SRSF6,TXN,PCM1,DNAH8,HMGN1,NUFIP2,TPI1,MAP4,MYH…
GO:CC	organelle lumen	GO:0043233	8.97254e-06	5.04708	5579	63	RPS8,DENND1A,SNRPD1,RBM3,PDX1,FUS,RPS6,RPL7A,HNRNPUL1,ALYREF,SF3B2,LMNA,YBX1,CPSF6,SAPS3,NUP205,ZC3H13,WTAP,PEX5,TJP2,NUDT21,AKAP8L,GJA1,RPL11,TRA2B,SNRPN,TUBB,SRSF12,CGGBP1,DDB1,YWHAZ,CCT4,SRSF6,TXN,HMGN1,NUFIP2,RPS27A,JUP,TACC2,PPIA,RBMX,HNRNPAB,HNRNPA3,HNRNPD,CFL1,HSPA8,DDX31,CBLL1,DLAT,RPL13,CYR61,ILF2,SNRPD3,TUFM,RPL23A,RPS20,HSPA1B,MFAP1,RBM14,RPS9,HNRNPF,RSL1D1,TRIM21
GO:CC	membrane-enclosed lumen	GO:0031974	8.97254e-06	5.04708	5579	63	RPS8,DENND1A,SNRPD1,RBM3,PDX1,FUS,RPS6,RPL7A,HNRNPUL1,ALYREF,SF3B2,LMNA,YBX1,CPSF6,SAPS3,NUP205,ZC3H13,WTAP,PEX5,TJP2,NUDT21,AKAP8L,GJA1,RPL11,TRA2B,SNRPN,TUBB,SRSF12,CGGBP1,DDB1,YWHAZ,CCT4,SRSF6,TXN,HMGN1,NUFIP2,RPS27A,JUP,TACC2,PPIA,RBMX,HNRNPAB,HNRNPA3,HNRNPD,CFL1,HSPA8,DDX31,CBLL1,DLAT,RPL13,CYR61,ILF2,SNRPD3,TUFM,RPL23A,RPS20,HSPA1B,MFAP1,RBM14,RPS9,HNRNPF,RSL1D1,TRIM21
GO:CC	intracellular organelle lumen	GO:0070013	8.97254e-06	5.04708	5579	63	RPS8,DENND1A,SNRPD1,RBM3,PDX1,FUS,RPS6,RPL7A,HNRNPUL1,ALYREF,SF3B2,LMNA,YBX1,CPSF6,SAPS3,NUP205,ZC3H13,WTAP,PEX5,TJP2,NUDT21,AKAP8L,GJA1,RPL11,TRA2B,SNRPN,TUBB,SRSF12,CGGBP1,DDB1,YWHAZ,CCT4,SRSF6,TXN,HMGN1,NUFIP2,RPS27A,JUP,TACC2,PPIA,RBMX,HNRNPAB,HNRNPA3,HNRNPD,CFL1,HSPA8,DDX31,CBLL1,DLAT,RPL13,CYR61,ILF2,SNRPD3,TUFM,RPL23A,RPS20,HSPA1B,MFAP1,RBM14,RPS9,HNRNPF,RSL1D1,TRIM21
GO:CC	polysomal ribosome	GO:0042788	1.88688e-05	4.72425	34	6	RPL18A,RPL7A,RPL11,NUFIP2,RPL24,BTF3
GO:CC	cytosolic large ribosomal subunit	GO:0022625	1.93873e-05	4.71248	57	7	RPL34,RPL18A,RPL7A,RPL11,RPL13,RPL24,RPL23A
GO:CC	cytoplasm	GO:0005737	2.05063e-05	4.68811	11951	100	AIMP1,CHMP4B,RPS8,ANKRD50,DENND1A,SNRPD1,RBM3,PDLIM5,RPL34,PDX1,FUS,RPL18A,RPS6,CHMP5,GAPDH,RPL7A,CALD1,KPRP,LMNA,YBX1,IFT20,CPSF6,SAPS3,TMX3,NUP205,TACC3,WTAP,INF2,MOV10,SPAG9,RIPK2,TAX1BP1,CCDC47,PEX5,ADSL,TJP2,TBC1D4,TJP1,PGAM5,NUDT21,AKAP8L,GJA1,RPL11,TRA2B,PDE4C,SNRPN,RPS27L,TUBB,SRSF12,YBX3,CCDC6,CBS,AIMP2,DDB1,YWHAZ,CCT4,TXN,PCM1,DNAH8,HMGN1,NUFIP2,TPI1,MAP4,MYH11,RPS27A,DSP,JUP,TPM1,TPM4,…
GO:CC	intracellular anatomical structure	GO:0005622	2.89229e-05	4.53876	14808	112	AIMP1,CHMP4B,RPS8,ANKRD50,DENND1A,SNRPD1,RBM3,PDLIM5,RPL34,PDX1,FUS,RPL18A,RPS6,CHMP5,GAPDH,RPL7A,HNRNPUL1,CALD1,CGN,KPRP,ALYREF,SF3B2,LMNA,YBX1,IFT20,CPSF6,SAPS3,TMX3,NUP205,ZC3H13,TACC3,WTAP,INF2,MOV10,SPAG9,RIPK2,TAX1BP1,LUZP1,CCDC47,PEX5,ADSL,TJP2,TBC1D4,TJP1,CGNL1,PGAM5,NUDT21,AKAP8L,GJA1,RPL11,TRA2B,PDE4C,SNRPN,RPS27L,TUBB,SRSF12,CGGBP1,YBX3,CCDC6,CBS,AIMP2,DDB1,YWHAZ,CCT4,SRSF6,TXN,PCM1,DN…
GO:CC	cytosolic small ribosomal subunit	GO:0022627	0.000123731	3.90752	46	6	RPS8,RPS6,RPS27L,RPS27A,RPS20,RPS9
GO:CC	nucleoplasm	GO:0005654	0.000228009	3.64205	4112	49	RPS8,DENND1A,SNRPD1,RBM3,PDX1,FUS,RPS6,HNRNPUL1,ALYREF,SF3B2,LMNA,YBX1,CPSF6,SAPS3,ZC3H13,WTAP,TJP2,NUDT21,AKAP8L,GJA1,RPL11,TRA2B,SNRPN,SRSF12,CGGBP1,DDB1,YWHAZ,CCT4,SRSF6,TXN,HMGN1,NUFIP2,RPS27A,TACC2,RBMX,HNRNPAB,HNRNPA3,HNRNPD,HSPA8,CBLL1,ILF2,SNRPD3,RPS20,HSPA1B,MFAP1,RBM14,RPS9,HNRNPF,TRIM21
GO:CC	large ribosomal subunit	GO:0015934	0.000243794	3.61298	119	8	RBM3,RPL34,RPL18A,RPL7A,RPL11,RPL13,RPL24,RPL23A
GO:CC	anchoring junction	GO:0070161	0.000287993	3.54062	838	19	RPS8,PDLIM5,RPL7A,CGN,TJP2,TJP1,CGNL1,GJA1,YBX3,YWHAZ,DSP,JUP,TPM4,DBN1,PPIA,CFL1,HSPA8,HSPA1B,RPS9
GO:CC	muscle thin filament tropomyosin	GO:0005862	0.000303806	3.5174	4	3	TPM1,TPM4,TPM3
GO:CC	catalytic step 2 spliceosome	GO:0071013	0.000313971	3.50311	85	7	SNRPD1,SF3B2,SNRPN,RBMX,HNRNPA3,SNRPD3,HNRNPF
GO:CC	nuclear speck	GO:0016607	0.000545342	3.26333	413	13	PDX1,ALYREF,SF3B2,LMNA,CPSF6,ZC3H13,WTAP,AKAP8L,SRSF12,SRSF6,CBLL1,HSPA1B,RBM14
GO:CC	membrane-bounded organelle	GO:0043227	0.000737483	3.13225	13201	103	AIMP1,CHMP4B,RPS8,ANKRD50,DENND1A,SNRPD1,RBM3,RPL34,PDX1,FUS,RPS6,CHMP5,GAPDH,RPL7A,HNRNPUL1,KPRP,ALYREF,SF3B2,LMNA,YBX1,IFT20,CPSF6,SAPS3,TMX3,NUP205,ZC3H13,TACC3,WTAP,MOV10,SPAG9,RIPK2,FBLN2,TAX1BP1,LUZP1,CCDC47,PEX5,TJP2,TBC1D4,TJP1,PGAM5,NUDT21,AKAP8L,GJA1,RPL11,TRA2B,PDE4C,SNRPN,RPS27L,TUBB,SRSF12,CGGBP1,YBX3,CBS,AIMP2,DDB1,YWHAZ,CCT4,SRSF6,TXN,PCM1,DNAH8,HMGN1,NUFIP2,TPI1,MAP4,MYH11,RPS27A,…
GO:CC	actin cytoskeleton	GO:0015629	0.00123196	2.9094	517	14	PDLIM5,CALD1,CGN,TJP1,CGNL1,MYH11,JUP,TPM1,TPM4,TPM3,DBN1,MYL1,MYL6,CFL1
GO:CC	small ribosomal subunit	GO:0015935	0.00248455	2.60475	76	6	RPS8,RPS6,RPS27L,RPS27A,RPS20,RPS9
GO:CC	U2 snRNP	GO:0005686	0.00253143	2.59663	21	4	SNRPD1,SF3B2,SNRPN,SNRPD3
GO:CC	cytoskeleton	GO:0005856	0.00292132	2.53442	2339	32	PDLIM5,GAPDH,CALD1,CGN,LMNA,IFT20,TACC3,SPAG9,RIPK2,TJP1,CGNL1,NUDT21,TUBB,CCDC6,CCT4,PCM1,DNAH8,MAP4,MYH11,DSP,JUP,TPM1,TPM4,TPM3,DBN1,MYL1,TACC2,MYL6,PDE4D,CFL1,HSPA1B,MFAP1
GO:CC	RNA N6-methyladenosine methyltransferase complex	GO:0036396	0.00417714	2.37912	8	3	ZC3H13,WTAP,CBLL1
GO:CC	mRNA editing complex	GO:0045293	0.00417714	2.37912	8	3	ZC3H13,WTAP,CBLL1
GO:CC	supramolecular complex	GO:0099080	0.00585167	2.23272	1325	22	PDLIM5,RPS6,CALD1,LMNA,YBX1,MOV10,TUBB,CCT4,DNAH8,NUFIP2,MAP4,MYH11,DSP,JUP,TPM1,TPM4,TPM3,DBN1,MYL1,HNRNPA3,MFAP1,TRIM21
GO:CC	vesicle	GO:0031982	0.0063336	2.19835	4058	45	CHMP4B,RPS8,ANKRD50,DENND1A,RPL34,CHMP5,GAPDH,KPRP,YBX1,TMX3,SPAG9,RIPK2,FBLN2,TAX1BP1,LUZP1,TBC1D4,GJA1,RPL11,TUBB,DDB1,YWHAZ,CCT4,TXN,TPI1,MYH11,RPS27A,DSP,JUP,TPM4,TPM3,PPIA,MYL6,RBMX,PCMT1,CFL1,HSPA8,ILF2,RPL24,TUFM,RPL23A,RPS20,SBSN,HSPA1B,RPS9,TRIM21
GO:CC	U12-type spliceosomal complex	GO:0005689	0.0083761	2.07696	28	4	SNRPD1,SF3B2,YBX1,SNRPD3
GO:CC	myosin complex	GO:0016459	0.00886195	2.05247	57	5	CGN,CGNL1,MYH11,MYL1,MYL6
GO:CC	U4 snRNP	GO:0005687	0.00887058	2.05205	10	3	SNRPD1,SNRPN,SNRPD3
GO:CC	fascia adherens	GO:0005916	0.00887058	2.05205	10	3	GJA1,DSP,JUP
GO:CC	nuclear body	GO:0016604	0.0137224	1.86257	816	16	PDX1,ALYREF,SF3B2,LMNA,CPSF6,ZC3H13,WTAP,NUDT21,AKAP8L,SRSF12,SRSF6,NUFIP2,CBLL1,SNRPD3,HSPA1B,RBM14
GO:CC	focal adhesion	GO:0005925	0.0194593	1.71087	420	11	RPS8,RPL7A,GJA1,YWHAZ,JUP,TPM4,PPIA,CFL1,HSPA8,HSPA1B,RPS9
GO:CC	cell-substrate junction	GO:0030055	0.022562	1.64662	427	11	RPS8,RPL7A,GJA1,YWHAZ,JUP,TPM4,PPIA,CFL1,HSPA8,HSPA1B,RPS9
GO:CC	cell-cell contact zone	GO:0044291	0.0356227	1.44827	76	5	TJP2,TJP1,GJA1,DSP,JUP
GO:CC	actomyosin	GO:0042641	0.0428222	1.36833	79	5	PDLIM5,TPM1,TPM4,TPM3,DBN1
GO:CC	contractile fiber	GO:0043292	0.0430674	1.36585	242	8	PDLIM5,CALD1,MYH11,JUP,TPM1,TPM4,TPM3,MYL1
KEGG	Ribosome	KEGG:03010	3.34756e-08	7.47527	153	13	RPS8,RPL34,RPL18A,RPS6,RPL7A,RPL11,RPS27L,RPS27A,RPL13,RPL24,RPL23A,RPS20,RPS9
KEGG	Spliceosome	KEGG:03040	3.96807e-06	5.40142	150	11	SNRPD1,FUS,ALYREF,SF3B2,TRA2B,SRSF6,RBMX,HNRNPA3,HSPA8,SNRPD3,HSPA1B
KEGG	Coronavirus disease - COVID-19	KEGG:05171	5.06463e-06	5.29545	231	13	RPS8,RPL34,RPL18A,RPS6,RPL7A,RPL11,RPS27L,RPS27A,RPL13,RPL24,RPL23A,RPS20,RPS9
KEGG	Tight junction	KEGG:04530	0.0471826	1.32622	169	7	CGN,TJP2,TJP1,CGNL1,YBX3,MYH11,MYL6
REAC	Metabolism of RNA	REAC:R-HSA-8953854	3.48989e-13	12.4572	662	31	RPS8,SNRPD1,RPL34,FUS,RPL18A,RPS6,RPL7A,HNRNPUL1,SF3B2,YBX1,NUP205,WTAP,NUDT21,RPL11,TRA2B,SNRPN,RPS27L,YWHAZ,SRSF6,RPS27A,RBMX,HNRNPA3,HNRNPD,HSPA8,RPL13,RPL24,SNRPD3,RPL23A,RPS20,RPS9,HNRNPF
REAC	Selenoamino acid metabolism	REAC:R-HSA-2408522	7.26026e-13	12.139	117	16	AIMP1,RPS8,RPL34,RPL18A,RPS6,RPL7A,RPL11,RPS27L,CBS,AIMP2,RPS27A,RPL13,RPL24,RPL23A,RPS20,RPS9
REAC	Viral mRNA Translation	REAC:R-HSA-192823	1.86527e-10	9.72926	90	13	RPS8,RPL34,RPL18A,RPS6,RPL7A,RPL11,RPS27L,RPS27A,RPL13,RPL24,RPL23A,RPS20,RPS9
REAC	Peptide chain elongation	REAC:R-HSA-156902	1.86527e-10	9.72926	90	13	RPS8,RPL34,RPL18A,RPS6,RPL7A,RPL11,RPS27L,RPS27A,RPL13,RPL24,RPL23A,RPS20,RPS9
REAC	Eukaryotic Translation Termination	REAC:R-HSA-72764	3.32729e-10	9.47791	94	13	RPS8,RPL34,RPL18A,RPS6,RPL7A,RPL11,RPS27L,RPS27A,RPL13,RPL24,RPL23A,RPS20,RPS9
REAC	Eukaryotic Translation Elongation	REAC:R-HSA-156842	3.32729e-10	9.47791	94	13	RPS8,RPL34,RPL18A,RPS6,RPL7A,RPL11,RPS27L,RPS27A,RPL13,RPL24,RPL23A,RPS20,RPS9
REAC	Selenocysteine synthesis	REAC:R-HSA-2408557	3.32729e-10	9.47791	94	13	RPS8,RPL34,RPL18A,RPS6,RPL7A,RPL11,RPS27L,RPS27A,RPL13,RPL24,RPL23A,RPS20,RPS9
REAC	Nonsense Mediated Decay (NMD) independent of the Exon Junction Complex (EJC)	REAC:R-HSA-975956	4.3984e-10	9.35671	96	13	RPS8,RPL34,RPL18A,RPS6,RPL7A,RPL11,RPS27L,RPS27A,RPL13,RPL24,RPL23A,RPS20,RPS9
REAC	Influenza Infection	REAC:R-HSA-168255	7.9676e-10	9.09867	152	15	RPS8,RPL34,RPL18A,RPS6,RPL7A,NUP205,RPL11,RPS27L,RPS27A,RPL13,RPL24,RPL23A,RPS20,RPS9,SLC25A6
REAC	Formation of a pool of free 40S subunits	REAC:R-HSA-72689	9.785e-10	9.00944	102	13	RPS8,RPL34,RPL18A,RPS6,RPL7A,RPL11,RPS27L,RPS27A,RPL13,RPL24,RPL23A,RPS20,RPS9
REAC	Response of EIF2AK4 (GCN2) to amino acid deficiency	REAC:R-HSA-9633012	9.785e-10	9.00944	102	13	RPS8,RPL34,RPL18A,RPS6,RPL7A,RPL11,RPS27L,RPS27A,RPL13,RPL24,RPL23A,RPS20,RPS9
REAC	Influenza Viral RNA Transcription and Replication	REAC:R-HSA-168273	1.9066e-09	8.71974	133	14	RPS8,RPL34,RPL18A,RPS6,RPL7A,NUP205,RPL11,RPS27L,RPS27A,RPL13,RPL24,RPL23A,RPS20,RPS9
REAC	L13a-mediated translational silencing of Ceruloplasmin expression	REAC:R-HSA-156827	3.32103e-09	8.47873	112	13	RPS8,RPL34,RPL18A,RPS6,RPL7A,RPL11,RPS27L,RPS27A,RPL13,RPL24,RPL23A,RPS20,RPS9
REAC	GTP hydrolysis and joining of the 60S ribosomal subunit	REAC:R-HSA-72706	3.72734e-09	8.4286	113	13	RPS8,RPL34,RPL18A,RPS6,RPL7A,RPL11,RPS27L,RPS27A,RPL13,RPL24,RPL23A,RPS20,RPS9
REAC	SRP-dependent cotranslational protein targeting to membrane	REAC:R-HSA-1799339	3.72734e-09	8.4286	113	13	RPS8,RPL34,RPL18A,RPS6,RPL7A,RPL11,RPS27L,RPS27A,RPL13,RPL24,RPL23A,RPS20,RPS9
REAC	Processing of Capped Intron-Containing Pre-mRNA	REAC:R-HSA-72203	4.23955e-09	8.37268	237	17	SNRPD1,FUS,HNRNPUL1,SF3B2,YBX1,NUP205,WTAP,NUDT21,TRA2B,SNRPN,SRSF6,RBMX,HNRNPA3,HNRNPD,HSPA8,SNRPD3,HNRNPF
REAC	Nonsense Mediated Decay (NMD) enhanced by the Exon Junction Complex (EJC)	REAC:R-HSA-975957	5.23413e-09	8.28116	116	13	RPS8,RPL34,RPL18A,RPS6,RPL7A,RPL11,RPS27L,RPS27A,RPL13,RPL24,RPL23A,RPS20,RPS9
REAC	Nonsense-Mediated Decay (NMD)	REAC:R-HSA-927802	5.23413e-09	8.28116	116	13	RPS8,RPL34,RPL18A,RPS6,RPL7A,RPL11,RPS27L,RPS27A,RPL13,RPL24,RPL23A,RPS20,RPS9
REAC	mRNA Splicing - Major Pathway	REAC:R-HSA-72163	7.95743e-09	8.09923	178	15	SNRPD1,FUS,HNRNPUL1,SF3B2,YBX1,NUDT21,TRA2B,SNRPN,SRSF6,RBMX,HNRNPA3,HNRNPD,HSPA8,SNRPD3,HNRNPF
REAC	Cap-dependent Translation Initiation	REAC:R-HSA-72737	8.10807e-09	8.09108	120	13	RPS8,RPL34,RPL18A,RPS6,RPL7A,RPL11,RPS27L,RPS27A,RPL13,RPL24,RPL23A,RPS20,RPS9
REAC	Eukaryotic Translation Initiation	REAC:R-HSA-72613	8.10807e-09	8.09108	120	13	RPS8,RPL34,RPL18A,RPS6,RPL7A,RPL11,RPS27L,RPS27A,RPL13,RPL24,RPL23A,RPS20,RPS9
REAC	mRNA Splicing	REAC:R-HSA-72172	1.49784e-08	7.82453	186	15	SNRPD1,FUS,HNRNPUL1,SF3B2,YBX1,NUDT21,TRA2B,SNRPN,SRSF6,RBMX,HNRNPA3,HNRNPD,HSPA8,SNRPD3,HNRNPF
REAC	Cellular response to starvation	REAC:R-HSA-9711097	2.44232e-07	6.6122	157	13	RPS8,RPL34,RPL18A,RPS6,RPL7A,RPL11,RPS27L,RPS27A,RPL13,RPL24,RPL23A,RPS20,RPS9
REAC	Regulation of expression of SLITs and ROBOs	REAC:R-HSA-9010553	7.03469e-07	6.15276	171	13	RPS8,RPL34,RPL18A,RPS6,RPL7A,RPL11,RPS27L,RPS27A,RPL13,RPL24,RPL23A,RPS20,RPS9
REAC	Translation	REAC:R-HSA-72766	9.86394e-07	6.00595	292	16	AIMP1,RPS8,RPL34,RPL18A,RPS6,RPL7A,RPL11,RPS27L,AIMP2,RPS27A,RPL13,RPL24,TUFM,RPL23A,RPS20,RPS9
REAC	Major pathway of rRNA processing in the nucleolus and cytosol	REAC:R-HSA-6791226	1.61533e-06	5.79174	183	13	RPS8,RPL34,RPL18A,RPS6,RPL7A,RPL11,RPS27L,RPS27A,RPL13,RPL24,RPL23A,RPS20,RPS9
REAC	rRNA processing in the nucleus and cytosol	REAC:R-HSA-8868773	3.08357e-06	5.51095	193	13	RPS8,RPL34,RPL18A,RPS6,RPL7A,RPL11,RPS27L,RPS27A,RPL13,RPL24,RPL23A,RPS20,RPS9
REAC	Metabolism of amino acids and derivatives	REAC:R-HSA-71291	4.21814e-06	5.37488	370	17	AIMP1,RPS8,RPL34,RPL18A,RPS6,RPL7A,RPL11,RPS27L,CBS,AIMP2,RPS27A,DLAT,RPL13,RPL24,RPL23A,RPS20,RPS9
REAC	rRNA processing	REAC:R-HSA-72312	5.67081e-06	5.24635	203	13	RPS8,RPL34,RPL18A,RPS6,RPL7A,RPL11,RPS27L,RPS27A,RPL13,RPL24,RPL23A,RPS20,RPS9
REAC	Signaling by ROBO receptors	REAC:R-HSA-376176	1.25854e-05	4.90013	217	13	RPS8,RPL34,RPL18A,RPS6,RPL7A,RPL11,RPS27L,RPS27A,RPL13,RPL24,RPL23A,RPS20,RPS9
REAC	Smooth Muscle Contraction	REAC:R-HSA-445355	0.000282178	3.54948	38	6	CALD1,MYH11,TPM1,TPM4,TPM3,MYL6
REAC	Cellular responses to stress	REAC:R-HSA-2262752	0.000579987	3.23658	582	18	RPS8,RPL34,RPL18A,RPS6,RPL7A,NUP205,MOV10,RPL11,RPS27L,TXN,RPS27A,HSPA8,RPL13,RPL24,RPL23A,RPS20,HSPA1B,RPS9
REAC	Cellular responses to external stimuli	REAC:R-HSA-8953897	0.000815044	3.08882	596	18	RPS8,RPL34,RPL18A,RPS6,RPL7A,NUP205,MOV10,RPL11,RPS27L,TXN,RPS27A,HSPA8,RPL13,RPL24,RPL23A,RPS20,HSPA1B,RPS9
REAC	Axon guidance	REAC:R-HSA-422475	0.00117434	2.93021	549	17	RPS8,RPL34,RPL18A,RPS6,RPL7A,RPL11,RPS27L,MYH11,RPS27A,MYL6,CFL1,HSPA8,RPL13,RPL24,RPL23A,RPS20,RPS9
REAC	Formation of the ternary complex, and subsequently, the 43S complex	REAC:R-HSA-72695	0.00189225	2.72302	52	6	RPS8,RPS6,RPS27L,RPS27A,RPS20,RPS9
REAC	Nervous system development	REAC:R-HSA-9675108	0.00213791	2.67001	574	17	RPS8,RPL34,RPL18A,RPS6,RPL7A,RPL11,RPS27L,MYH11,RPS27A,MYL6,CFL1,HSPA8,RPL13,RPL24,RPL23A,RPS20,RPS9
REAC	Translation initiation complex formation	REAC:R-HSA-72649	0.00399372	2.39862	59	6	RPS8,RPS6,RPS27L,RPS27A,RPS20,RPS9
REAC	Ribosomal scanning and start codon recognition	REAC:R-HSA-72702	0.00399372	2.39862	59	6	RPS8,RPS6,RPS27L,RPS27A,RPS20,RPS9
REAC	Activation of the mRNA upon binding of the cap-binding complex and eIFs, and subsequent binding to 43S	REAC:R-HSA-72662	0.00440748	2.35581	60	6	RPS8,RPS6,RPS27L,RPS27A,RPS20,RPS9
REAC	Infectious disease	REAC:R-HSA-5663205	0.00692065	2.15985	909	21	CHMP4B,RPS8,RPL34,RPL18A,RPS6,CHMP5,RPL7A,NUP205,RPL11,RPS27L,TUBB,TXN,RPS27A,PPIA,CBLL1,RPL13,RPL24,RPL23A,RPS20,RPS9,SLC25A6
REAC	mRNA Splicing - Minor Pathway	REAC:R-HSA-72165	0.0274214	1.56191	51	5	SNRPD1,SF3B2,YBX1,SRSF6,SNRPD3
REAC	Regulation of gap junction activity	REAC:R-HSA-191650	0.028862	1.53967	2	2	TJP1,GJA1
REAC	Budding and maturation of HIV virion	REAC:R-HSA-162588	0.0343353	1.46426	28	4	CHMP4B,CHMP5,RPS27A,PPIA
REAC	Apoptotic cleavage of cell adhesion proteins	REAC:R-HSA-351906	0.0375646	1.42522	11	3	TJP2,TJP1,DSP
WP	Cytoplasmic Ribosomal Proteins	WP:WP477	1.29928e-08	7.8863	90	12	RPS8,RPL34,RPL18A,RPS6,RPL7A,RPL11,RPS27A,RPL13,RPL24,RPL23A,RPS20,RPS9
WP	mRNA Processing	WP:WP411	1.27439e-06	5.8947	133	12	SNRPD1,FUS,SF3B2,YBX1,NUDT21,TRA2B,SNRPN,SRSF6,RBMX,HNRNPAB,HNRNPD,SNRPD3
TF	Factor: ELF4; motif: NCCGGAARTN	TF:M02056	1.69322e-05	4.77129	5379	61	RPS8,SNRPD1,RBM3,PDLIM5,RPS6,CHMP5,HNRNPUL1,ALYREF,SF3B2,YBX1,SAPS3,TMX3,ZC3H13,TACC3,WTAP,INF2,SPAG9,RIPK2,TAX1BP1,CCDC47,PEX5,ADSL,PGAM5,NUDT21,RPL11,SNRPN,RPS27L,CGGBP1,CBS,YWHAZ,CCT4,TXN,PCM1,TMEM263,RPS27A,DSP,TPM4,DBN1,TACC2,PPIA,HNRNPAB,PDE4D,HNRNPA3,PCMT1,HNRNPD,CFL1,DDX31,CBLL1,DLAT,RPL24,SNRPD3,TUFM,RPL23A,SBSN,HSPA1B,MFAP1,RBM14,SLC25A6,RSL1D1,BTF3,TRIM21
TF	Factor: ELF1; motif: NCCGGAARTN	TF:M02053	4.02251e-05	4.3955	6085	65	RPS8,DENND1A,SNRPD1,RBM3,RPS6,CHMP5,GAPDH,HNRNPUL1,ALYREF,SF3B2,YBX1,IFT20,SAPS3,TMX3,ZC3H13,TACC3,INF2,SPAG9,RIPK2,TAX1BP1,CCDC47,PEX5,ADSL,PGAM5,NUDT21,RPL11,TRA2B,SNRPN,RPS27L,CGGBP1,CCDC6,CBS,YWHAZ,CCT4,TXN,TMEM263,RPS27A,DSP,TPM4,DBN1,TACC2,PPIA,HNRNPAB,PDE4D,HNRNPA3,PCMT1,HNRNPD,CFL1,DDX31,DLAT,RPL24,SNRPD3,TUFM,RPL23A,RPS20,SBSN,HSPA1B,MFAP1,RBM14,RPS9,SLC25A6,HNRNPF,RSL1D1,BTF3,TRIM21
TF	Factor: Elk-1; motif: NNCCGGAAGTN; match class: 1	TF:M11435_1	4.14621e-05	4.38235	5791	63	CHMP4B,SNRPD1,RBM3,RPL34,FUS,RPS6,CHMP5,GAPDH,ALYREF,SF3B2,YBX1,IFT20,TMX3,ZC3H13,TACC3,WTAP,RIPK2,TAX1BP1,CCDC47,PEX5,ADSL,TJP1,PGAM5,NUDT21,RPL11,RPS27L,CGGBP1,CCDC6,CBS,YWHAZ,SRSF6,PCM1,TMEM263,DNAH8,HMGN1,TPI1,RPS27A,DSP,TPM4,DBN1,PPIA,HNRNPAB,PDE4D,HNRNPA3,HNRNPD,CFL1,HSPA8,DDX31,CBLL1,ILF2,RPL24,SNRPD3,TUFM,RPL23A,RPS20,SBSN,MFAP1,RBM14,RPS9,SLC25A6,HNRNPF,RSL1D1,TRIM21
TF	Factor: SAP-1; motif: NNCCGGAAGTGN	TF:M09905	0.000138272	3.85927	8354	78	CHMP4B,DENND1A,SNRPD1,RBM3,PDLIM5,RPL34,PDX1,RPL18A,RPS6,CHMP5,HNRNPUL1,CALD1,ALYREF,SF3B2,YBX1,IFT20,SAPS3,TMX3,ZC3H13,TACC3,WTAP,MOV10,SPAG9,RIPK2,TAX1BP1,CCDC47,PEX5,ADSL,TBC1D4,TJP1,PGAM5,NUDT21,RPL11,SNRPN,RPS27L,CGGBP1,CCDC6,CBS,AIMP2,YWHAZ,TXN,PCM1,TMEM263,DNAH8,HMGN1,NUFIP2,MYH11,RPS27A,DSP,TPM4,DBN1,TACC2,HNRNPAB,PDE4D,HNRNPA3,PCMT1,HNRNPD,CFL1,HSPA8,DDX31,CBLL1,DLAT,RPL13,RPL24,SNRPD3,T…
TF	Factor: ZNF501; motif: NNNCSACGCGAACAC	TF:M12085	0.000165176	3.78205	8554	79	AKAP2,CHMP4B,RPS8,RBM3,PDLIM5,RPL34,PDX1,RPL18A,CHMP5,GAPDH,HNRNPUL1,CGN,ALYREF,SF3B2,YBX1,TMX3,NUP205,SLC39A10,TACC3,WTAP,MOV10,SPAG9,RIPK2,FBLN2,TAX1BP1,LUZP1,ADSL,TJP2,TBC1D4,TJP1,CGNL1,PGAM5,NUDT21,AKAP8L,GJA1,RPL11,TRA2B,TUBB,SRSF12,CGGBP1,YBX3,CCDC6,CBS,DDB1,SRSF6,TXN,TMEM263,NUFIP2,TPI1,DSP,JUP,TPM1,TPM4,TPM3,DBN1,TACC2,RBMX,HNRNPAB,HNRNPA3,PCMT1,HNRNPD,CFL1,DDX31,CBLL1,RPL13,CYR61,ILF2,RP…
TF	Factor: ERG; motif: ACCGGAARTN; match class: 1	TF:M03975_1	0.000218605	3.66034	4048	49	RPS8,SNRPD1,RBM3,RPL34,RPS6,CHMP5,HNRNPUL1,ALYREF,SF3B2,YBX1,ZC3H13,TACC3,SPAG9,RIPK2,TAX1BP1,CCDC47,PEX5,ADSL,PGAM5,RPL11,TRA2B,CGGBP1,CCDC6,CBS,AIMP2,TXN,PCM1,TMEM263,HMGN1,RPS27A,DBN1,TACC2,PPIA,HNRNPAB,CFL1,DDX31,CBLL1,RPL24,SNRPD3,TUFM,RPL23A,RPS20,SBSN,MFAP1,RBM14,RPS9,SLC25A6,HNRNPF,RSL1D1
TF	Factor: Fli-1; motif: NACCGGAARTN; match class: 1	TF:M11404_1	0.000319803	3.49512	3194	42	SNRPD1,RBM3,RPS6,CHMP5,HNRNPUL1,ALYREF,SF3B2,YBX1,ZC3H13,TACC3,SPAG9,RIPK2,CCDC47,PEX5,ADSL,PGAM5,RPL11,TRA2B,CCDC6,CBS,TXN,PCM1,TMEM263,RPS27A,TPM4,DBN1,PPIA,HNRNPAB,CFL1,DDX31,CBLL1,RPL24,SNRPD3,RPL23A,RPS20,SBSN,MFAP1,RBM14,RPS9,SLC25A6,HNRNPF,RSL1D1
TF	Factor: FLI-1; motif: NAYTTCCGGT; match class: 1	TF:M08913_1	0.00035795	3.44618	3083	41	SNRPD1,RBM3,RPS6,CHMP5,HNRNPUL1,ALYREF,SF3B2,ZC3H13,TACC3,SPAG9,RIPK2,TAX1BP1,CCDC47,PEX5,PGAM5,RPL11,CGGBP1,CCDC6,CBS,TXN,PCM1,TMEM263,RPS27A,DBN1,PPIA,HNRNPAB,CFL1,DDX31,CBLL1,RPL24,SNRPD3,TUFM,RPL23A,RPS20,SBSN,MFAP1,RPS9,SLC25A6,HNRNPF,RSL1D1,TRIM21
TF	Factor: Elk-1; motif: NNNNCCGGAARTNN; match class: 1	TF:M00025_1	0.000412512	3.38456	4674	53	RPS8,DENND1A,SNRPD1,RBM3,PDX1,RPL18A,RPS6,CHMP5,HNRNPUL1,ALYREF,SF3B2,SAPS3,TMX3,ZC3H13,TACC3,SPAG9,RIPK2,TAX1BP1,CCDC47,PEX5,ADSL,PGAM5,RPL11,RPS27L,CGGBP1,CCDC6,CBS,AIMP2,TXN,PCM1,TMEM263,RPS27A,DBN1,PPIA,HNRNPAB,PCMT1,CFL1,DDX31,CBLL1,RPL13,RPL24,SNRPD3,TUFM,RPL23A,RPS20,SBSN,HSPA1B,MFAP1,RPS9,SLC25A6,HNRNPF,RSL1D1,TRIM21
TF	Factor: Erg; motif: NACCGGAARTN; match class: 1	TF:M11396_1	0.000607794	3.21624	5009	55	DENND1A,SNRPD1,RBM3,RPS6,CHMP5,HNRNPUL1,ALYREF,SF3B2,YBX1,TMX3,ZC3H13,SLC39A10,TACC3,SPAG9,RIPK2,TAX1BP1,CCDC47,PEX5,ADSL,PGAM5,RPL11,CGGBP1,CCDC6,CBS,AIMP2,YWHAZ,CCT4,TXN,PCM1,TMEM263,HMGN1,RPS27A,TPM4,DBN1,PPIA,HNRNPAB,HNRNPA3,CFL1,DDX31,CBLL1,RPL24,SNRPD3,TUFM,RPL23A,RPS20,SBSN,HSPA1B,MFAP1,RBM14,RPS9,SLC25A6,HNRNPF,RSL1D1,BTF3,TRIM21
TF	Factor: ETV7; motif: NCCGGAANNN; match class: 1	TF:M02071_1	0.000842996	3.07417	4495	51	DENND1A,SNRPD1,RBM3,PDX1,RPL18A,CHMP5,HNRNPUL1,ALYREF,SF3B2,SAPS3,TMX3,ZC3H13,SLC39A10,TACC3,MOV10,RIPK2,CCDC47,PEX5,ADSL,PGAM5,RPL11,RPS27L,CGGBP1,CCDC6,CBS,AIMP2,TXN,PCM1,TMEM263,HMGN1,NUFIP2,RPS27A,DBN1,HNRNPAB,CFL1,DDX31,CBLL1,RPL13,RPL24,SNRPD3,RPL23A,RPS20,SBSN,HSPA1B,MFAP1,RBM14,RPS9,SLC25A6,HNRNPF,RSL1D1,BTF3
TF	Factor: FLI1; motif: ACCGGAARTN; match class: 1	TF:M03988_1	0.00116129	2.93506	2969	39	SNRPD1,RBM3,RPS6,CHMP5,HNRNPUL1,ALYREF,SF3B2,ZC3H13,TACC3,SPAG9,RIPK2,CCDC47,PEX5,PGAM5,RPL11,TRA2B,CCDC6,CBS,TXN,PCM1,TMEM263,RPS27A,DBN1,PPIA,HNRNPAB,CFL1,DDX31,CBLL1,RPL24,SNRPD3,RPL23A,RPS20,SBSN,MFAP1,RBM14,RPS9,SLC25A6,HNRNPF,RSL1D1
TF	Factor: ER81; motif: RCCGGAARYN; match class: 1	TF:M02065_1	0.00154924	2.80988	6798	66	CHMP4B,RPS8,DENND1A,SNRPD1,RBM3,RPL34,RPL18A,RPS6,CHMP5,HNRNPUL1,ALYREF,SF3B2,YBX1,SAPS3,TMX3,ZC3H13,TACC3,WTAP,INF2,SPAG9,RIPK2,TAX1BP1,CCDC47,PEX5,ADSL,TJP1,PGAM5,RPL11,RPS27L,CGGBP1,CCDC6,CBS,AIMP2,YWHAZ,CCT4,SRSF6,TXN,PCM1,TMEM263,DNAH8,TPI1,RPS27A,DSP,DBN1,PPIA,HNRNPAB,PDE4D,CFL1,HSPA8,DDX31,CBLL1,ILF2,RPL24,SNRPD3,TUFM,RPL23A,RPS20,SBSN,HSPA1B,MFAP1,RBM14,RPS9,SLC25A6,HNRNPF,RSL1D1,TRIM21
TF	Factor: SAP-1; motif: NNCCGGAAGTGN; match class: 1	TF:M09905_1	0.00176242	2.75389	3017	39	SNRPD1,RBM3,RPS6,CHMP5,ALYREF,SF3B2,TMX3,ZC3H13,TACC3,RIPK2,TAX1BP1,CCDC47,PEX5,ADSL,PGAM5,RPL11,CGGBP1,CCDC6,CBS,AIMP2,TXN,PCM1,TMEM263,HMGN1,RPS27A,DBN1,CFL1,DDX31,CBLL1,RPL24,SNRPD3,RPL23A,RPS20,SBSN,MFAP1,RPS9,SLC25A6,HNRNPF,RSL1D1
TF	Factor: Fli-1; motif: NACCGGAARTN; match class: 1	TF:M11400_1	0.0024231	2.61563	4230	48	DENND1A,SNRPD1,RBM3,RPS6,CHMP5,HNRNPUL1,ALYREF,SF3B2,YBX1,TMX3,ZC3H13,TACC3,SPAG9,RIPK2,CCDC47,PEX5,ADSL,PGAM5,RPL11,CGGBP1,CCDC6,CBS,AIMP2,YWHAZ,TXN,PCM1,TMEM263,RPS27A,TPM4,DBN1,PPIA,HNRNPAB,HNRNPA3,CFL1,DDX31,CBLL1,RPL24,SNRPD3,RPL23A,RPS20,SBSN,HSPA1B,MFAP1,RBM14,RPS9,SLC25A6,HNRNPF,RSL1D1
TF	Factor: FLI-1; motif: NAYTTCCGGT	TF:M08913	0.00340926	2.46734	8401	75	CHMP4B,RPS8,DENND1A,SNRPD1,RBM3,PDLIM5,RPL34,PDX1,RPL18A,RPS6,CHMP5,HNRNPUL1,ALYREF,SF3B2,YBX1,IFT20,SAPS3,TMX3,ZC3H13,TACC3,WTAP,SPAG9,RIPK2,TAX1BP1,CCDC47,PEX5,ADSL,TJP1,PGAM5,NUDT21,RPL11,TRA2B,SNRPN,RPS27L,CGGBP1,CCDC6,CBS,AIMP2,YWHAZ,TXN,PCM1,TMEM263,DNAH8,HMGN1,RPS27A,DSP,TPM4,DBN1,TACC2,PPIA,HNRNPAB,PDE4D,HNRNPA3,PCMT1,HNRNPD,CFL1,HSPA8,DDX31,CBLL1,DLAT,RPL24,SNRPD3,TUFM,RPL23A,RPS20,SBSN,…
TF	Factor: ERG; motif: ACCGGAART; match class: 1	TF:M01752_1	0.00341279	2.46689	3740	44	SNRPD1,RBM3,RPL34,RPS6,CHMP5,HNRNPUL1,ALYREF,SF3B2,ZC3H13,TACC3,SPAG9,RIPK2,TAX1BP1,CCDC47,PEX5,ADSL,PGAM5,RPL11,TRA2B,CCDC6,TXN,PCM1,TMEM263,DNAH8,HMGN1,RPS27A,DBN1,PPIA,CFL1,DDX31,CBLL1,RPL24,SNRPD3,TUFM,RPL23A,RPS20,SBSN,MFAP1,RBM14,RPS9,SLC25A6,HNRNPF,RSL1D1,TRIM21
TF	Factor: ETS1; motif: ACCGGAARYN; match class: 1	TF:M03977_1	0.00378772	2.42162	4710	51	RPS8,DENND1A,SNRPD1,RBM3,RPS6,CHMP5,HNRNPUL1,ALYREF,SF3B2,YBX1,SAPS3,TMX3,ZC3H13,TACC3,RIPK2,CCDC47,PEX5,ADSL,PGAM5,RPL11,RPS27L,CGGBP1,CCDC6,CBS,AIMP2,YWHAZ,TXN,PCM1,TMEM263,HMGN1,RPS27A,TPM4,DBN1,HNRNPAB,HNRNPA3,PCMT1,CFL1,DDX31,CBLL1,RPL24,SNRPD3,RPL23A,RPS20,SBSN,HSPA1B,MFAP1,RBM14,RPS9,SLC25A6,HNRNPF,RSL1D1
TF	Factor: TEL1; motif: CNCGGAANNN	TF:M02070	0.00411562	2.38556	10938	89	CHMP4B,RPS8,DENND1A,SNRPD1,RBM3,RPL34,PDX1,FUS,RPS6,CHMP5,GAPDH,RPL7A,HNRNPUL1,CALD1,ALYREF,SF3B2,YBX1,CPSF6,SAPS3,TMX3,NUP205,ZC3H13,SLC39A10,TACC3,WTAP,INF2,SPAG9,RIPK2,TAX1BP1,CCDC47,PEX5,ADSL,TJP2,TBC1D4,TJP1,PGAM5,NUDT21,GJA1,RPL11,TRA2B,SNRPN,RPS27L,TUBB,SRSF12,CGGBP1,YBX3,CCDC6,CBS,AIMP2,DDB1,YWHAZ,CCT4,TXN,PCM1,TMEM263,HMGN1,NUFIP2,TPI1,MYH11,RPS27A,TPM4,TACC2,PPIA,HNRNPAB,PDE4D,HNRNPA3,P…
TF	Factor: ELK-1; motif: ACCGGAAGTN	TF:M02059	0.00504104	2.29748	9512	81	CHMP4B,RPS8,DENND1A,SNRPD1,RBM3,PDLIM5,RPL34,PDX1,RPL18A,RPS6,CHMP5,HNRNPUL1,CALD1,ALYREF,SF3B2,YBX1,IFT20,CPSF6,SAPS3,TMX3,ZC3H13,TACC3,WTAP,SPAG9,RIPK2,TAX1BP1,CCDC47,PEX5,ADSL,TJP1,PGAM5,NUDT21,RPL11,TRA2B,SNRPN,RPS27L,CGGBP1,CCDC6,CBS,AIMP2,DDB1,YWHAZ,CCT4,SRSF6,TXN,PCM1,TMEM263,DNAH8,HMGN1,RPS27A,DSP,TPM4,DBN1,TACC2,PPIA,HNRNPAB,PDE4D,HNRNPA3,PCMT1,HNRNPD,CFL1,HSPA8,DDX31,CBLL1,DLAT,ILF2,RPL…
TF	Factor: ETS1; motif: ACCGGAARYN	TF:M03977	0.0053184	2.27422	10612	87	CHMP4B,RPS8,DENND1A,SNRPD1,RBM3,PDLIM5,RPL34,PDX1,FUS,RPL18A,RPS6,CHMP5,GAPDH,RPL7A,HNRNPUL1,CALD1,CGN,ALYREF,SF3B2,YBX1,IFT20,SAPS3,TMX3,NUP205,ZC3H13,SLC39A10,TACC3,INF2,MOV10,SPAG9,RIPK2,TAX1BP1,CCDC47,PEX5,ADSL,TBC1D4,TJP1,PGAM5,NUDT21,AKAP8L,RPL11,TRA2B,SNRPN,RPS27L,CGGBP1,YBX3,CCDC6,CBS,AIMP2,YWHAZ,TXN,PCM1,TMEM263,DNAH8,HMGN1,NUFIP2,MYH11,RPS27A,DSP,TPM4,DBN1,TACC2,HNRNPAB,PDE4D,HNRNPA3,PC…
TF	Factor: ETV4; motif: ACCGGAAGTN	TF:M03982	0.00708863	2.14944	6903	65	CHMP4B,RPS8,DENND1A,SNRPD1,RBM3,RPL34,PDX1,RPL18A,RPS6,CHMP5,GAPDH,HNRNPUL1,CALD1,ALYREF,SF3B2,YBX1,IFT20,ZC3H13,TACC3,SPAG9,RIPK2,TAX1BP1,CCDC47,PEX5,ADSL,TJP1,PGAM5,NUDT21,RPL11,TRA2B,SNRPN,RPS27L,CGGBP1,CCDC6,CBS,AIMP2,YWHAZ,PCM1,TMEM263,DNAH8,HMGN1,RPS27A,TPM4,DBN1,HNRNPAB,PDE4D,PCMT1,HNRNPD,CFL1,DDX31,CBLL1,RPL24,SNRPD3,TUFM,RPL23A,RPS20,SBSN,MFAP1,RBM14,RPS9,SLC25A6,HNRNPF,RSL1D1,BTF3,TRIM21
TF	Factor: Erg; motif: NACCGGAARTN	TF:M11396	0.00735677	2.13331	10863	88	CHMP4B,RPS8,DENND1A,SNRPD1,RBM3,PDLIM5,RPL34,PDX1,RPL18A,RPS6,CHMP5,GAPDH,RPL7A,HNRNPUL1,CALD1,CGN,ALYREF,SF3B2,YBX1,IFT20,SAPS3,TMX3,NUP205,ZC3H13,SLC39A10,TACC3,WTAP,MOV10,SPAG9,RIPK2,TAX1BP1,CCDC47,PEX5,ADSL,TBC1D4,TJP1,PGAM5,NUDT21,RPL11,TRA2B,SNRPN,RPS27L,CGGBP1,CCDC6,CBS,AIMP2,YWHAZ,CCT4,TXN,PCM1,TMEM263,DNAH8,HMGN1,NUFIP2,MYH11,RPS27A,DSP,TPM4,DBN1,TACC2,PPIA,HNRNPAB,PDE4D,HNRNPA3,PCMT1,HN…
TF	Factor: ER71; motif: ACCGGAARYN	TF:M02067	0.00815736	2.08845	6001	59	RPS8,DENND1A,SNRPD1,RBM3,PDLIM5,PDX1,RPL18A,RPS6,CHMP5,HNRNPUL1,ALYREF,SF3B2,IFT20,TMX3,ZC3H13,TACC3,SPAG9,RIPK2,TAX1BP1,CCDC47,PEX5,ADSL,PGAM5,NUDT21,RPL11,SNRPN,RPS27L,CGGBP1,CCDC6,CBS,AIMP2,CCT4,TXN,PCM1,TMEM263,RPS27A,TPM4,DBN1,HNRNPAB,PDE4D,PCMT1,HNRNPD,CFL1,CBLL1,ILF2,RPL24,SNRPD3,TUFM,RPL23A,RPS20,SBSN,HSPA1B,MFAP1,RPS9,SLC25A6,HNRNPF,RSL1D1,BTF3,TRIM21
TF	Factor: ER81; motif: RCCGGAARYN	TF:M02065	0.00875467	2.05776	12666	97	AKAP2,CHMP4B,RPS8,ANKRD50,DENND1A,SNRPD1,RBM3,PDLIM5,RPL34,PDX1,RPL18A,RPS6,CHMP5,GAPDH,RPL7A,HNRNPUL1,CALD1,ALYREF,SF3B2,YBX1,IFT20,CPSF6,SAPS3,TMX3,NUP205,ZC3H13,SLC39A10,TACC3,WTAP,INF2,MOV10,SPAG9,RIPK2,TAX1BP1,CCDC47,PEX5,ADSL,TBC1D4,TJP1,PGAM5,NUDT21,AKAP8L,RPL11,TRA2B,SNRPN,RPS27L,SRSF12,CGGBP1,YBX3,CCDC6,CBS,AIMP2,DDB1,YWHAZ,CCT4,SRSF6,TXN,PCM1,TMEM263,DNAH8,HMGN1,NUFIP2,TPI1,MYH11,RPS27A…
TF	Factor: Elk-1; motif: NNNNCCGGAARTNN	TF:M00025	0.00940831	2.02649	10355	85	CHMP4B,RPS8,DENND1A,SNRPD1,RBM3,PDLIM5,RPL34,PDX1,RPL18A,RPS6,CHMP5,RPL7A,HNRNPUL1,CALD1,ALYREF,SF3B2,YBX1,IFT20,SAPS3,TMX3,NUP205,ZC3H13,SLC39A10,TACC3,WTAP,INF2,MOV10,SPAG9,RIPK2,TAX1BP1,CCDC47,PEX5,ADSL,TBC1D4,TJP1,PGAM5,NUDT21,RPL11,SNRPN,RPS27L,CGGBP1,YBX3,CCDC6,CBS,AIMP2,YWHAZ,TXN,PCM1,TMEM263,DNAH8,HMGN1,NUFIP2,MYH11,RPS27A,DSP,TPM4,DBN1,TACC2,PPIA,HNRNPAB,PDE4D,HNRNPA3,PCMT1,HNRNPD,CFL1,H…
TF	Factor: ETV7; motif: NCCGGAANNN	TF:M02071	0.0115828	1.93619	10214	84	CHMP4B,RPS8,DENND1A,SNRPD1,RBM3,PDLIM5,RPL34,PDX1,RPL18A,RPS6,CHMP5,RPL7A,HNRNPUL1,CALD1,ALYREF,SF3B2,YBX1,IFT20,SAPS3,TMX3,NUP205,ZC3H13,SLC39A10,TACC3,INF2,MOV10,SPAG9,RIPK2,TAX1BP1,CCDC47,PEX5,ADSL,TBC1D4,TJP1,PGAM5,NUDT21,RPL11,SNRPN,RPS27L,CGGBP1,YBX3,CCDC6,CBS,AIMP2,YWHAZ,CCT4,TXN,PCM1,TMEM263,DNAH8,HMGN1,NUFIP2,MYH11,RPS27A,DSP,TPM4,DBN1,TACC2,HNRNPAB,PDE4D,HNRNPA3,PCMT1,HNRNPD,CFL1,HSPA8,…
TF	Factor: Erg; motif: NACCGGAARYN; match class: 1	TF:M11392_1	0.0118309	1.92698	3253	39	DENND1A,SNRPD1,RBM3,RPS6,CHMP5,HNRNPUL1,ALYREF,SF3B2,TMX3,ZC3H13,TACC3,RIPK2,CCDC47,PGAM5,RPL11,CGGBP1,CCDC6,CBS,AIMP2,PCM1,TMEM263,RPS27A,PPIA,HNRNPAB,CFL1,DDX31,CBLL1,RPL24,SNRPD3,RPL23A,RPS20,SBSN,HSPA1B,MFAP1,RBM14,RPS9,SLC25A6,HNRNPF,RSL1D1
TF	Factor: Fli-1; motif: NACCGGAARTN	TF:M11400	0.0121257	1.91629	10042	83	CHMP4B,RPS8,DENND1A,SNRPD1,RBM3,PDLIM5,RPL34,PDX1,RPL18A,RPS6,CHMP5,GAPDH,RPL7A,HNRNPUL1,CALD1,ALYREF,SF3B2,YBX1,IFT20,SAPS3,TMX3,NUP205,ZC3H13,SLC39A10,TACC3,MOV10,SPAG9,RIPK2,TAX1BP1,CCDC47,PEX5,ADSL,TBC1D4,TJP1,PGAM5,NUDT21,RPL11,TRA2B,SNRPN,RPS27L,CGGBP1,CCDC6,CBS,AIMP2,YWHAZ,TXN,PCM1,TMEM263,DNAH8,HMGN1,NUFIP2,MYH11,RPS27A,DSP,TPM4,DBN1,TACC2,PPIA,HNRNPAB,PDE4D,HNRNPA3,PCMT1,HNRNPD,CFL1,DDX3…
TF	Factor: PEA3; motif: NACCGGAAGTN; match class: 1	TF:M11427_1	0.015582	1.80738	4645	49	SNRPD1,RBM3,FUS,RPS6,CHMP5,GAPDH,HNRNPUL1,CGN,ALYREF,SF3B2,YBX1,ZC3H13,WTAP,SPAG9,RIPK2,TAX1BP1,CCDC47,PEX5,ADSL,PGAM5,TRA2B,CCDC6,CBS,YWHAZ,CCT4,SRSF6,PCM1,TMEM263,DNAH8,HMGN1,RPS27A,DBN1,HNRNPA3,DDX31,CBLL1,RPL24,SNRPD3,TUFM,RPL23A,RPS20,SBSN,MFAP1,RBM14,RPS9,SLC25A6,HNRNPF,RSL1D1,BTF3,TRIM21
TF	Factor: PEA3; motif: NACCGGAAGTN; match class: 1	TF:M11430_1	0.0168859	1.77248	4943	51	SNRPD1,RBM3,FUS,RPS6,CHMP5,GAPDH,HNRNPUL1,CGN,ALYREF,SF3B2,YBX1,ZC3H13,WTAP,SPAG9,RIPK2,TAX1BP1,CCDC47,PEX5,ADSL,TJP2,PGAM5,CCDC6,CBS,YWHAZ,CCT4,SRSF6,TXN,PCM1,TMEM263,DNAH8,HMGN1,RPS27A,DBN1,HNRNPA3,DDX31,CBLL1,RPL24,SNRPD3,TUFM,RPL23A,RPS20,SBSN,HSPA1B,MFAP1,RBM14,RPS9,SLC25A6,HNRNPF,RSL1D1,BTF3,TRIM21
TF	Factor: pax-6; motif: NYACGCWTSANYGMNCN; match class: 1	TF:M11880_1	0.0220744	1.65611	7112	65	AKAP2,CHMP4B,RPS8,ANKRD50,PDX1,FUS,CHMP5,RPL7A,CGN,ALYREF,SF3B2,YBX1,IFT20,CPSF6,SAPS3,TMX3,NUP205,ZC3H13,WTAP,INF2,MOV10,LUZP1,CCDC47,TJP2,TBC1D4,TJP1,PGAM5,GJA1,RPL11,TRA2B,RPS27L,CGGBP1,YBX3,CBS,AIMP2,DDB1,YWHAZ,CCT4,SRSF6,TXN,TMEM263,HMGN1,MAP4,RPS27A,DSP,JUP,TPM1,TPM4,TPM3,TACC2,PPIA,RBMX,HNRNPAB,HNRNPA3,HNRNPD,CFL1,DDX31,CYR61,RPS20,SBSN,HSPA1B,RBM14,SLC25A6,RSL1D1,BTF3
TF	Factor: PEA3; motif: RCCGGAAGYN	TF:M02066	0.0235124	1.6287	7124	65	CHMP4B,RPS8,DENND1A,SNRPD1,RBM3,PDLIM5,RPL18A,RPS6,CHMP5,HNRNPUL1,ALYREF,SF3B2,YBX1,IFT20,ZC3H13,TACC3,WTAP,SPAG9,RIPK2,TAX1BP1,CCDC47,PEX5,ADSL,TJP1,PGAM5,NUDT21,RPL11,TRA2B,SNRPN,RPS27L,CGGBP1,CCDC6,CBS,AIMP2,TXN,PCM1,TMEM263,DNAH8,HMGN1,RPS27A,TPM4,DBN1,TACC2,PDE4D,PCMT1,HNRNPD,CFL1,HSPA8,DDX31,CBLL1,ILF2,RPL24,SNRPD3,TUFM,RPL23A,RPS20,SBSN,HSPA1B,MFAP1,RPS9,SLC25A6,HNRNPF,RSL1D1,BTF3,TRIM21
TF	Factor: GABPA; motif: ACCGGAAGTN	TF:M03990	0.0269659	1.56919	5312	53	DENND1A,SNRPD1,RPL18A,RPS6,CHMP5,GAPDH,CGN,ALYREF,SF3B2,YBX1,IFT20,ZC3H13,SLC39A10,TACC3,RIPK2,TAX1BP1,TJP1,PGAM5,NUDT21,RPL11,TRA2B,SNRPN,RPS27L,CGGBP1,CCDC6,CBS,AIMP2,YWHAZ,PCM1,TMEM263,RPS27A,TPM4,DBN1,PDE4D,HNRNPA3,HNRNPD,CFL1,CBLL1,RPL24,SNRPD3,TUFM,RPL23A,RPS20,SBSN,HSPA1B,MFAP1,RBM14,RPS9,SLC25A6,HNRNPF,RSL1D1,BTF3,TRIM21
TF	Factor: Erg; motif: ACCGGAAGTN	TF:M02062	0.0292239	1.53426	8143	71	CHMP4B,RPS8,DENND1A,SNRPD1,RBM3,PDLIM5,RPL34,PDX1,RPL18A,RPS6,CHMP5,GAPDH,HNRNPUL1,CALD1,ALYREF,SF3B2,YBX1,IFT20,ZC3H13,TACC3,SPAG9,RIPK2,TAX1BP1,CCDC47,PEX5,ADSL,TJP1,PGAM5,NUDT21,RPL11,TRA2B,SNRPN,RPS27L,CGGBP1,CCDC6,CBS,AIMP2,YWHAZ,CCT4,TXN,PCM1,TMEM263,DNAH8,HMGN1,RPS27A,TPM4,DBN1,PPIA,HNRNPAB,PDE4D,PCMT1,HNRNPD,CFL1,DDX31,CBLL1,ILF2,RPL24,SNRPD3,TUFM,RPL23A,RPS20,SBSN,HSPA1B,MFAP1,RBM14,RPS9…
TF	Factor: Erg; motif: ACCGGAAGTN; match class: 1	TF:M02062_1	0.0297511	1.5265	2739	34	SNRPD1,RBM3,RPS6,CHMP5,HNRNPUL1,ALYREF,SF3B2,YBX1,ZC3H13,RIPK2,TAX1BP1,CCDC47,PEX5,ADSL,PGAM5,CCDC6,PCM1,TMEM263,HMGN1,RPS27A,PPIA,DDX31,CBLL1,RPL24,SNRPD3,RPL23A,RPS20,SBSN,MFAP1,RBM14,RPS9,SLC25A6,HNRNPF,RSL1D1
TF	Factor: Fli-1; motif: NACCGGAARTN	TF:M11404	0.0308674	1.5105	8828	75	CHMP4B,RPS8,DENND1A,SNRPD1,RBM3,PDLIM5,RPL34,PDX1,RPL18A,RPS6,CHMP5,GAPDH,HNRNPUL1,CALD1,ALYREF,SF3B2,YBX1,IFT20,SAPS3,TMX3,ZC3H13,TACC3,SPAG9,RIPK2,TAX1BP1,CCDC47,PEX5,ADSL,TJP1,PGAM5,NUDT21,RPL11,TRA2B,SNRPN,RPS27L,CGGBP1,CCDC6,CBS,AIMP2,YWHAZ,TXN,PCM1,TMEM263,DNAH8,HMGN1,RPS27A,DSP,TPM4,DBN1,TACC2,PPIA,HNRNPAB,PDE4D,HNRNPA3,PCMT1,HNRNPD,CFL1,DDX31,CBLL1,DLAT,RPL24,SNRPD3,TUFM,RPL23A,RPS20,SBSN…
TF	Factor: ERG; motif: ACCGGAART	TF:M01752	0.0372324	1.42908	9560	79	CHMP4B,RPS8,DENND1A,SNRPD1,RBM3,PDLIM5,RPL34,PDX1,RPL18A,RPS6,CHMP5,GAPDH,HNRNPUL1,CALD1,KPRP,ALYREF,SF3B2,YBX1,IFT20,SAPS3,ZC3H13,TACC3,WTAP,SPAG9,RIPK2,TAX1BP1,CCDC47,PEX5,ADSL,TJP1,PGAM5,NUDT21,RPL11,TRA2B,SNRPN,RPS27L,CGGBP1,CCDC6,CBS,AIMP2,YWHAZ,CCT4,TXN,PCM1,TMEM263,DNAH8,HMGN1,RPS27A,DSP,TPM4,DBN1,TACC2,PPIA,HNRNPAB,PDE4D,HNRNPA3,PCMT1,HNRNPD,CFL1,HSPA8,DDX31,CBLL1,DLAT,ILF2,RPL24,SNRPD3,T…
TF	Factor: ETS1; motif: GCCGGAWGTACTTCCGGN	TF:M03978	0.0410489	1.3867	12179	93	AKAP2,CHMP4B,RPS8,ANKRD50,DENND1A,SNRPD1,PDLIM5,RPL34,PDX1,FUS,RPL18A,RPS6,CHMP5,GAPDH,HNRNPUL1,CGN,ALYREF,SF3B2,YBX1,IFT20,CPSF6,SAPS3,TMX3,NUP205,ZC3H13,SLC39A10,TACC3,WTAP,INF2,MOV10,SPAG9,RIPK2,FBLN2,TAX1BP1,CCDC47,ADSL,TJP2,TJP1,CGNL1,PGAM5,NUDT21,AKAP8L,RPL11,TRA2B,PDE4C,RPS27L,TUBB,CGGBP1,CCDC6,CBS,AIMP2,DDB1,YWHAZ,SRSF6,TXN,PCM1,TMEM263,DNAH8,NUFIP2,TPI1,MYH11,RPS27A,DSP,JUP,TPM4,DBN1,MYL…
TF	Factor: FLI1; motif: ACCGGAARTN	TF:M03988	0.0457269	1.33983	8401	72	CHMP4B,RPS8,DENND1A,SNRPD1,RBM3,PDLIM5,RPL34,PDX1,RPL18A,RPS6,CHMP5,HNRNPUL1,ALYREF,SF3B2,YBX1,IFT20,SAPS3,TMX3,ZC3H13,TACC3,SPAG9,RIPK2,TAX1BP1,CCDC47,PEX5,ADSL,TJP1,PGAM5,NUDT21,RPL11,TRA2B,SNRPN,RPS27L,CGGBP1,CCDC6,CBS,AIMP2,TXN,PCM1,TMEM263,DNAH8,HMGN1,RPS27A,DSP,TPM4,DBN1,TACC2,PPIA,HNRNPAB,PDE4D,HNRNPA3,PCMT1,HNRNPD,CFL1,DDX31,CBLL1,DLAT,RPL24,SNRPD3,TUFM,RPL23A,RPS20,SBSN,HSPA1B,MFAP1,RBM1…
MIRNA	hsa-miR-615-3p	MIRNA:hsa-miR-615-3p	3.19368e-08	7.49571	892	28	SNRPD1,FUS,GAPDH,RPL7A,ALYREF,SF3B2,LMNA,YBX1,SAPS3,MOV10,LUZP1,TJP1,AKAP8L,TUBB,CBS,YWHAZ,TPI1,JUP,TPM3,DBN1,HNRNPAB,HSPA8,DLAT,RPL13,ILF2,TUFM,HSPA1B,HNRNPF
MIRNA	hsa-miR-149-5p	MIRNA:hsa-miR-149-5p	3.27573e-06	5.48469	394	17	RPL34,RPL18A,GAPDH,CALD1,ALYREF,YBX1,TACC3,CBS,DDB1,CCT4,TXN,DBN1,HNRNPAB,HSPA8,ILF2,HSPA1B,RPS9
MIRNA	hsa-miR-193b-3p	MIRNA:hsa-miR-193b-3p	0.00257526	2.58918	848	20	HNRNPUL1,SF3B2,TACC3,SPAG9,TJP2,TUBB,YBX3,CBS,AIMP2,DDB1,YWHAZ,CCT4,NUFIP2,TPI1,HNRNPAB,CFL1,SNRPD3,RPL23A,HSPA1B,RSL1D1
MIRNA	hsa-miR-16-5p	MIRNA:hsa-miR-16-5p	0.00468277	2.3295	1556	28	AIMP1,CHMP4B,PDLIM5,RPS6,YBX1,SAPS3,SLC39A10,INF2,MOV10,LUZP1,TUBB,YBX3,HMGN1,NUFIP2,TPI1,MAP4,DSP,TPM3,PDE4D,PCMT1,HSPA8,DDX31,RPL13,HSPA1B,SLC25A6,HNRNPF,RSL1D1,BTF3
MIRNA	hsa-miR-18a-3p	MIRNA:hsa-miR-18a-3p	0.0357852	1.4463	348	11	RPL18A,HNRNPUL1,SF3B2,TACC3,TUBB,DBN1,PPIA,HNRNPD,RPL24,HSPA1B,HNRNPF
HPA	skin 2; epidermal cells[High]	HPA:0470683	5.40825e-08	7.26694	1369	36	FUS,RPS6,GAPDH,HNRNPUL1,ALYREF,SF3B2,LMNA,YBX1,CPSF6,WTAP,PEX5,TBC1D4,GJA1,TRA2B,CGGBP1,YWHAZ,SRSF6,HMGN1,RPS27A,JUP,TPM4,HNRNPAB,HNRNPA3,HNRNPD,RPL13,ILF2,RPL24,SNRPD3,TUFM,RPS20,HSPA1B,RBM14,HNRNPF,RSL1D1,BTF3,TRIM21
HPA	oral mucosa	HPA:0330000	7.73989e-08	7.11127	6161	82	AIMP1,CHMP4B,ANKRD50,SNRPD1,RBM3,PDLIM5,FUS,RPL18A,RPS6,GAPDH,HNRNPUL1,CALD1,ALYREF,SF3B2,LMNA,YBX1,IFT20,CPSF6,SAPS3,TACC3,WTAP,INF2,SPAG9,RIPK2,LUZP1,CCDC47,PEX5,ADSL,TJP2,TBC1D4,TJP1,PGAM5,AKAP8L,GJA1,RPL11,TRA2B,TUBB,CGGBP1,YBX3,CCDC6,AIMP2,DDB1,YWHAZ,CCT4,SRSF6,TXN,PCM1,HMGN1,MAP4,RPS27A,DSP,JUP,TPM1,TPM4,TPM3,DBN1,TACC2,MYL6,RBMX,HNRNPAB,HNRNPA3,PCMT1,HNRNPD,CFL1,CBLL1,DLAT,RPL13,ILF2,RPL24…
HPA	oral mucosa; squamous epithelial cells[‚â•Low]	HPA:0330221	7.73989e-08	7.11127	6161	82	AIMP1,CHMP4B,ANKRD50,SNRPD1,RBM3,PDLIM5,FUS,RPL18A,RPS6,GAPDH,HNRNPUL1,CALD1,ALYREF,SF3B2,LMNA,YBX1,IFT20,CPSF6,SAPS3,TACC3,WTAP,INF2,SPAG9,RIPK2,LUZP1,CCDC47,PEX5,ADSL,TJP2,TBC1D4,TJP1,PGAM5,AKAP8L,GJA1,RPL11,TRA2B,TUBB,CGGBP1,YBX3,CCDC6,AIMP2,DDB1,YWHAZ,CCT4,SRSF6,TXN,PCM1,HMGN1,MAP4,RPS27A,DSP,JUP,TPM1,TPM4,TPM3,DBN1,TACC2,MYL6,RBMX,HNRNPAB,HNRNPA3,PCMT1,HNRNPD,CFL1,CBLL1,DLAT,RPL13,ILF2,RPL24…
HPA	endometrium 1; cells in endometrial stroma[‚â•Medium]	HPA:0160252	3.14042e-07	6.50301	2178	45	FUS,RPS6,GAPDH,HNRNPUL1,CALD1,ALYREF,SF3B2,LMNA,YBX1,IFT20,CPSF6,SAPS3,FBLN2,LUZP1,ADSL,TBC1D4,AKAP8L,GJA1,RPL11,TRA2B,CGGBP1,YBX3,YWHAZ,SRSF6,HMGN1,MAP4,RPS27A,TPM4,TPM3,DBN1,RBMX,HNRNPAB,HNRNPA3,HNRNPD,CBLL1,RPL13,ILF2,RPL24,SNRPD3,TUFM,RPS20,RBM14,HNRNPF,RSL1D1,BTF3
HPA	tonsil; germinal center cells[High]	HPA:0600433	2.98506e-06	5.52505	1211	31	FUS,HNRNPUL1,ALYREF,SF3B2,LMNA,CPSF6,SAPS3,TACC3,WTAP,PEX5,ADSL,TBC1D4,PGAM5,TRA2B,TUBB,CGGBP1,YWHAZ,SRSF6,HMGN1,RPS27A,TPM4,RBMX,HNRNPAB,HNRNPA3,HNRNPD,CFL1,CBLL1,ILF2,RPL24,TUFM,BTF3
HPA	stomach 2; glandular cells[High]	HPA:0550053	5.5318e-06	5.25713	2378	45	CHMP4B,SNRPD1,FUS,RPS6,HNRNPUL1,CGN,ALYREF,SF3B2,LMNA,YBX1,IFT20,CPSF6,SAPS3,WTAP,INF2,SPAG9,CCDC47,PEX5,TBC1D4,AKAP8L,TRA2B,CGGBP1,YWHAZ,SRSF6,HMGN1,RPS27A,JUP,TPM4,RBMX,HNRNPAB,HNRNPA3,HNRNPD,CFL1,RPL13,ILF2,RPL24,SNRPD3,TUFM,RPS20,RBM14,RPS9,SLC25A6,HNRNPF,RSL1D1,TRIM21
HPA	esophagus; squamous epithelial cells[‚â•Medium]	HPA:0190222	5.68286e-06	5.24543	4989	70	AIMP1,CHMP4B,ANKRD50,SNRPD1,RBM3,PDLIM5,FUS,RPL18A,RPS6,GAPDH,HNRNPUL1,CGN,ALYREF,SF3B2,LMNA,YBX1,IFT20,CPSF6,SAPS3,WTAP,SPAG9,LUZP1,CCDC47,PEX5,ADSL,TJP2,TBC1D4,PGAM5,AKAP8L,GJA1,TRA2B,TUBB,CGGBP1,YBX3,CCDC6,AIMP2,DDB1,YWHAZ,SRSF6,TXN,PCM1,HMGN1,MAP4,RPS27A,DSP,JUP,TPM4,TPM3,TACC2,RBMX,HNRNPAB,HNRNPA3,HNRNPD,CBLL1,DLAT,RPL13,ILF2,RPL24,SNRPD3,TUFM,RPL23A,RPS20,SBSN,HSPA1B,RBM14,RPS9,SLC25A6,HNRN…
HPA	breast; glandular cells[High]	HPA:0050053	5.94662e-06	5.22573	1320	32	FUS,RPS6,HNRNPUL1,ALYREF,SF3B2,LMNA,IFT20,CPSF6,WTAP,RIPK2,CCDC47,PEX5,TBC1D4,TRA2B,CGGBP1,DDB1,YWHAZ,SRSF6,RPS27A,JUP,TPM4,HNRNPAB,HNRNPA3,ILF2,RPL24,SNRPD3,RPS20,RBM14,HNRNPF,RSL1D1,BTF3,TRIM21
HPA	oral mucosa; squamous epithelial cells[High]	HPA:0330223	1.03765e-05	4.98395	1133	29	SNRPD1,FUS,RPS6,GAPDH,HNRNPUL1,ALYREF,SF3B2,LMNA,YBX1,CPSF6,WTAP,TRA2B,CGGBP1,SRSF6,HMGN1,RPS27A,JUP,TPM4,HNRNPAB,HNRNPA3,HNRNPD,RPL13,ILF2,RPL24,TUFM,RPS20,HNRNPF,RSL1D1,BTF3
HPA	testis; sertoli cells[‚â•Medium]	HPA:0570802	1.46129e-05	4.83526	1682	36	CHMP4B,ANKRD50,SNRPD1,FUS,HNRNPUL1,CALD1,CGN,ALYREF,LMNA,CPSF6,SAPS3,SPAG9,LUZP1,CCDC47,PEX5,ADSL,TJP2,TJP1,CGNL1,AKAP8L,GJA1,TRA2B,TUBB,CGGBP1,AIMP2,CCT4,SRSF6,PCM1,HMGN1,MAP4,RPS27A,JUP,TACC2,RBMX,ILF2,SNRPD3
HPA	breast; glandular cells[‚â•Low]	HPA:0050051	2.00197e-05	4.69854	6717	82	AIMP1,CHMP4B,ANKRD50,SNRPD1,RBM3,PDLIM5,FUS,RPL18A,RPS6,CHMP5,GAPDH,HNRNPUL1,CALD1,CGN,ALYREF,SF3B2,LMNA,YBX1,IFT20,CPSF6,SAPS3,SLC39A10,TACC3,WTAP,INF2,SPAG9,RIPK2,LUZP1,CCDC47,PEX5,ADSL,TJP2,TBC1D4,TJP1,CGNL1,PGAM5,AKAP8L,GJA1,RPL11,TRA2B,TUBB,CGGBP1,YBX3,CCDC6,AIMP2,DDB1,YWHAZ,CCT4,SRSF6,TXN,PCM1,HMGN1,MAP4,RPS27A,JUP,TPM4,TPM3,DBN1,TACC2,MYL6,RBMX,HNRNPAB,HNRNPA3,PCMT1,HNRNPD,CFL1,CBLL1,DLAT,…
HPA	oral mucosa; squamous epithelial cells[‚â•Medium]	HPA:0330222	2.06169e-05	4.68578	4303	63	AIMP1,ANKRD50,SNRPD1,RBM3,PDLIM5,FUS,RPL18A,RPS6,GAPDH,HNRNPUL1,ALYREF,SF3B2,LMNA,YBX1,IFT20,CPSF6,SAPS3,TACC3,WTAP,SPAG9,LUZP1,CCDC47,PEX5,ADSL,TBC1D4,PGAM5,AKAP8L,GJA1,RPL11,TRA2B,TUBB,CGGBP1,YBX3,CCDC6,AIMP2,DDB1,YWHAZ,SRSF6,TXN,PCM1,HMGN1,RPS27A,JUP,TPM4,TPM3,RBMX,HNRNPAB,HNRNPA3,HNRNPD,CBLL1,RPL13,ILF2,RPL24,TUFM,RPL23A,RPS20,HSPA1B,RBM14,RPS9,SLC25A6,HNRNPF,RSL1D1,BTF3
HPA	breast; glandular cells[‚â•Medium]	HPA:0050052	2.60868e-05	4.58358	5024	69	AIMP1,CHMP4B,ANKRD50,SNRPD1,PDLIM5,FUS,RPL18A,RPS6,GAPDH,HNRNPUL1,CGN,ALYREF,SF3B2,LMNA,YBX1,IFT20,CPSF6,SAPS3,WTAP,INF2,SPAG9,RIPK2,LUZP1,CCDC47,PEX5,ADSL,TJP2,TBC1D4,CGNL1,PGAM5,AKAP8L,RPL11,TRA2B,TUBB,CGGBP1,CCDC6,DDB1,YWHAZ,CCT4,SRSF6,TXN,HMGN1,MAP4,RPS27A,JUP,TPM4,TPM3,TACC2,MYL6,RBMX,HNRNPAB,HNRNPA3,PCMT1,HNRNPD,CBLL1,DLAT,RPL13,ILF2,RPL24,SNRPD3,TUFM,RPS20,RBM14,RPS9,SLC25A6,HNRNPF,RSL1D1,…
HPA	breast	HPA:0050000	3.65833e-05	4.43672	7084	84	AIMP1,CHMP4B,ANKRD50,SNRPD1,RBM3,PDLIM5,FUS,RPL18A,RPS6,CHMP5,GAPDH,HNRNPUL1,CALD1,CGN,ALYREF,SF3B2,LMNA,YBX1,IFT20,CPSF6,SAPS3,SLC39A10,TACC3,WTAP,INF2,SPAG9,RIPK2,LUZP1,CCDC47,PEX5,ADSL,TJP2,TBC1D4,TJP1,CGNL1,PGAM5,AKAP8L,GJA1,RPL11,TRA2B,TUBB,CGGBP1,YBX3,CCDC6,AIMP2,DDB1,YWHAZ,CCT4,SRSF6,TXN,PCM1,HMGN1,MAP4,MYH11,RPS27A,JUP,TPM4,TPM3,DBN1,TACC2,MYL6,RBMX,HNRNPAB,HNRNPA3,PCMT1,HNRNPD,CFL1,CBLL1…
HPA	endometrium 1	HPA:0160000	4.48372e-05	4.34836	6954	83	AIMP1,CHMP4B,ANKRD50,SNRPD1,RBM3,PDLIM5,FUS,RPL18A,RPS6,CHMP5,GAPDH,HNRNPUL1,CALD1,CGN,ALYREF,SF3B2,LMNA,YBX1,IFT20,CPSF6,SAPS3,SLC39A10,TACC3,WTAP,INF2,SPAG9,RIPK2,FBLN2,LUZP1,CCDC47,PEX5,ADSL,TJP2,TBC1D4,TJP1,CGNL1,PGAM5,AKAP8L,GJA1,RPL11,TRA2B,PDE4C,TUBB,CGGBP1,YBX3,AIMP2,DDB1,YWHAZ,CCT4,SRSF6,TXN,PCM1,HMGN1,MAP4,RPS27A,JUP,TPM4,TPM3,DBN1,TACC2,MYL6,RBMX,HNRNPAB,HNRNPA3,PCMT1,HNRNPD,CFL1,CBLL1…
HPA	fallopian tube; glandular cells[High]	HPA:0210053	5.49591e-05	4.25996	1771	36	FUS,RPS6,HNRNPUL1,CGN,ALYREF,SF3B2,LMNA,CPSF6,SAPS3,WTAP,PEX5,ADSL,TBC1D4,AKAP8L,TRA2B,TUBB,CGGBP1,CCDC6,YWHAZ,SRSF6,HMGN1,RPS27A,JUP,TPM4,RBMX,HNRNPAB,HNRNPA3,HNRNPD,RPL13,ILF2,RPL24,SNRPD3,RPS20,RBM14,BTF3,TRIM21
HPA	placenta; decidual cells[High]	HPA:0380513	5.55487e-05	4.25533	1151	28	GAPDH,HNRNPUL1,CALD1,ALYREF,SF3B2,LMNA,IFT20,CPSF6,FBLN2,PGAM5,AKAP8L,TRA2B,CGGBP1,SRSF6,TXN,HMGN1,MAP4,HNRNPAB,CBLL1,RPL13,ILF2,RPL24,SNRPD3,TUFM,RBM14,RPS9,HNRNPF,RSL1D1
HPA	tonsil; squamous epithelial cells[High]	HPA:0600223	5.61863e-05	4.25037	1452	32	FUS,RPS6,HNRNPUL1,ALYREF,SF3B2,LMNA,YBX1,CPSF6,WTAP,CCDC47,ADSL,GJA1,TRA2B,CGGBP1,YWHAZ,SRSF6,HMGN1,JUP,TPM4,RBMX,HNRNPAB,HNRNPA3,HNRNPD,CBLL1,RPL13,ILF2,RPL24,TUFM,RBM14,RSL1D1,BTF3,TRIM21
HPA	esophagus; squamous epithelial cells[High]	HPA:0190223	6.25404e-05	4.20384	1617	34	FUS,RPS6,HNRNPUL1,ALYREF,SF3B2,LMNA,YBX1,IFT20,CPSF6,WTAP,CCDC47,PEX5,ADSL,PGAM5,TRA2B,DDB1,YWHAZ,SRSF6,HMGN1,RPS27A,JUP,TPM4,RBMX,HNRNPAB,HNRNPA3,HNRNPD,RPL13,ILF2,RPL24,TUFM,HSPA1B,RBM14,RSL1D1,BTF3
HPA	endometrium 1; glandular cells[‚â•Low]	HPA:0160051	7.88691e-05	4.10309	6722	81	AIMP1,CHMP4B,ANKRD50,SNRPD1,RBM3,PDLIM5,FUS,RPL18A,RPS6,CHMP5,GAPDH,HNRNPUL1,CALD1,CGN,ALYREF,SF3B2,LMNA,YBX1,IFT20,CPSF6,SAPS3,SLC39A10,TACC3,WTAP,INF2,SPAG9,RIPK2,LUZP1,CCDC47,PEX5,ADSL,TJP2,TBC1D4,TJP1,CGNL1,PGAM5,AKAP8L,GJA1,RPL11,TRA2B,PDE4C,TUBB,CGGBP1,YBX3,AIMP2,DDB1,YWHAZ,CCT4,SRSF6,TXN,PCM1,HMGN1,MAP4,RPS27A,JUP,TPM4,TPM3,DBN1,TACC2,MYL6,RBMX,HNRNPAB,HNRNPA3,PCMT1,HNRNPD,CFL1,CBLL1,DLAT,…
HPA	skin 2; epidermal cells[‚â•Medium]	HPA:0470682	8.00364e-05	4.09671	4787	66	AIMP1,CHMP4B,SNRPD1,PDLIM5,FUS,RPL18A,RPS6,GAPDH,HNRNPUL1,KPRP,ALYREF,SF3B2,LMNA,YBX1,IFT20,CPSF6,SAPS3,WTAP,LUZP1,CCDC47,PEX5,ADSL,TBC1D4,PGAM5,AKAP8L,GJA1,RPL11,TRA2B,TUBB,CGGBP1,YBX3,CCDC6,DDB1,YWHAZ,SRSF6,TXN,PCM1,HMGN1,MAP4,RPS27A,JUP,TPM4,TPM3,TACC2,RBMX,HNRNPAB,HNRNPA3,HNRNPD,CFL1,CBLL1,DLAT,RPL13,ILF2,RPL24,SNRPD3,TUFM,RPL23A,RPS20,SBSN,HSPA1B,RBM14,RPS9,HNRNPF,RSL1D1,BTF3,TRIM21
HPA	esophagus; squamous epithelial cells[‚â•Low]	HPA:0190221	8.18473e-05	4.087	6583	80	AIMP1,CHMP4B,ANKRD50,SNRPD1,RBM3,PDLIM5,FUS,RPL18A,RPS6,GAPDH,HNRNPUL1,CGN,ALYREF,SF3B2,LMNA,YBX1,IFT20,CPSF6,SAPS3,TACC3,WTAP,INF2,SPAG9,LUZP1,CCDC47,PEX5,ADSL,TJP2,TBC1D4,TJP1,PGAM5,AKAP8L,GJA1,RPL11,TRA2B,TUBB,CGGBP1,YBX3,CCDC6,AIMP2,DDB1,YWHAZ,CCT4,SRSF6,TXN,PCM1,HMGN1,MAP4,RPS27A,DSP,JUP,TPM4,TPM3,DBN1,TACC2,MYL6,RBMX,HNRNPAB,HNRNPA3,PCMT1,HNRNPD,CFL1,CBLL1,DLAT,RPL13,ILF2,RPL24,SNRPD3,TUFM,…
HPA	esophagus	HPA:0190000	8.18473e-05	4.087	6583	80	AIMP1,CHMP4B,ANKRD50,SNRPD1,RBM3,PDLIM5,FUS,RPL18A,RPS6,GAPDH,HNRNPUL1,CGN,ALYREF,SF3B2,LMNA,YBX1,IFT20,CPSF6,SAPS3,TACC3,WTAP,INF2,SPAG9,LUZP1,CCDC47,PEX5,ADSL,TJP2,TBC1D4,TJP1,PGAM5,AKAP8L,GJA1,RPL11,TRA2B,TUBB,CGGBP1,YBX3,CCDC6,AIMP2,DDB1,YWHAZ,CCT4,SRSF6,TXN,PCM1,HMGN1,MAP4,RPS27A,DSP,JUP,TPM4,TPM3,DBN1,TACC2,MYL6,RBMX,HNRNPAB,HNRNPA3,PCMT1,HNRNPD,CFL1,CBLL1,DLAT,RPL13,ILF2,RPL24,SNRPD3,TUFM,…
HPA	testis; pachytene spermatocytes[‚â•Low]	HPA:0570761	8.19444e-05	4.08648	2141	40	AIMP1,SNRPD1,FUS,CHMP5,HNRNPUL1,ALYREF,SF3B2,CPSF6,SAPS3,WTAP,SPAG9,RIPK2,CCDC47,PEX5,ADSL,PGAM5,AKAP8L,TRA2B,TUBB,SRSF12,CGGBP1,YBX3,AIMP2,CCT4,SRSF6,RPS27A,TPM1,TPM4,TPM3,HNRNPA3,HNRNPD,CBLL1,DLAT,ILF2,SNRPD3,TUFM,HSPA1B,RBM14,HNRNPF,RSL1D1
HPA	endometrium 1; cells in endometrial stroma[High]	HPA:0160253	9.84846e-05	4.00663	415	16	FUS,HNRNPUL1,CALD1,ALYREF,LMNA,CPSF6,ADSL,GJA1,TRA2B,CGGBP1,HMGN1,MAP4,RBMX,HNRNPAB,ILF2,TUFM
HPA	vagina; squamous epithelial cells[‚â•Low]	HPA:0620221	9.85877e-05	4.00618	5923	75	AIMP1,CHMP4B,ANKRD50,SNRPD1,RBM3,PDLIM5,FUS,RPL18A,RPS6,GAPDH,HNRNPUL1,CGN,ALYREF,SF3B2,LMNA,YBX1,IFT20,CPSF6,SAPS3,TACC3,WTAP,INF2,SPAG9,LUZP1,CCDC47,PEX5,ADSL,TJP2,TBC1D4,TJP1,PGAM5,AKAP8L,GJA1,RPL11,TRA2B,TUBB,CGGBP1,YBX3,CCDC6,DDB1,YWHAZ,CCT4,SRSF6,TXN,PCM1,HMGN1,MAP4,RPS27A,DSP,JUP,TPM4,TPM3,TACC2,MYL6,RBMX,HNRNPAB,HNRNPA3,HNRNPD,CBLL1,DLAT,RPL13,ILF2,RPL24,SNRPD3,TUFM,RPL23A,RPS20,SBSN,HSPA…
HPA	vagina	HPA:0620000	9.85877e-05	4.00618	5923	75	AIMP1,CHMP4B,ANKRD50,SNRPD1,RBM3,PDLIM5,FUS,RPL18A,RPS6,GAPDH,HNRNPUL1,CGN,ALYREF,SF3B2,LMNA,YBX1,IFT20,CPSF6,SAPS3,TACC3,WTAP,INF2,SPAG9,LUZP1,CCDC47,PEX5,ADSL,TJP2,TBC1D4,TJP1,PGAM5,AKAP8L,GJA1,RPL11,TRA2B,TUBB,CGGBP1,YBX3,CCDC6,DDB1,YWHAZ,CCT4,SRSF6,TXN,PCM1,HMGN1,MAP4,RPS27A,DSP,JUP,TPM4,TPM3,TACC2,MYL6,RBMX,HNRNPAB,HNRNPA3,HNRNPD,CBLL1,DLAT,RPL13,ILF2,RPL24,SNRPD3,TUFM,RPL23A,RPS20,SBSN,HSPA…
HPA	vagina; squamous epithelial cells[High]	HPA:0620223	0.000102961	3.98733	1113	27	FUS,RPS6,GAPDH,HNRNPUL1,ALYREF,SF3B2,LMNA,CPSF6,PEX5,ADSL,GJA1,TRA2B,CGGBP1,SRSF6,HMGN1,RPS27A,DSP,JUP,RBMX,HNRNPAB,HNRNPD,RPL13,ILF2,TUFM,RPS20,RSL1D1,BTF3
HPA	urinary bladder; urothelial cells[High]	HPA:0610833	0.000115763	3.93643	1994	38	FUS,RPS6,HNRNPUL1,ALYREF,SF3B2,LMNA,IFT20,CPSF6,SAPS3,WTAP,LUZP1,PEX5,ADSL,TBC1D4,TRA2B,CGGBP1,YWHAZ,SRSF6,HMGN1,MAP4,RPS27A,JUP,TPM4,RBMX,HNRNPAB,HNRNPA3,HNRNPD,RPL13,ILF2,RPL24,SNRPD3,TUFM,HSPA1B,RBM14,HNRNPF,RSL1D1,BTF3,TRIM21
HPA	hippocampus; neuronal cells[‚â•Medium]	HPA:0250132	0.000134332	3.87182	4162	60	AIMP1,CHMP4B,SNRPD1,FUS,RPL18A,RPS6,HNRNPUL1,ALYREF,SF3B2,LMNA,YBX1,IFT20,CPSF6,SPAG9,FBLN2,LUZP1,CCDC47,PEX5,ADSL,TBC1D4,PGAM5,AKAP8L,GJA1,RPL11,TRA2B,PDE4C,SNRPN,TUBB,CGGBP1,AIMP2,DDB1,YWHAZ,CCT4,SRSF6,PCM1,RPS27A,JUP,TPM4,TPM3,RBMX,HNRNPAB,HNRNPA3,PCMT1,HNRNPD,CBLL1,DLAT,RPL13,ILF2,RPL24,SNRPD3,TUFM,RPS20,HSPA1B,RBM14,RPS9,SLC25A6,HNRNPF,RSL1D1,BTF3,TRIM21
HPA	appendix; glandular cells[High]	HPA:0030053	0.000142529	3.8461	2010	38	CHMP4B,FUS,RPS6,HNRNPUL1,CGN,ALYREF,SF3B2,LMNA,IFT20,CPSF6,SAPS3,WTAP,INF2,CCDC47,PEX5,TBC1D4,TRA2B,CGGBP1,DDB1,YWHAZ,SRSF6,HMGN1,JUP,TPM4,RBMX,HNRNPAB,HNRNPA3,HNRNPD,CFL1,RPL13,ILF2,RPL24,TUFM,RPS20,RBM14,HNRNPF,RSL1D1,BTF3
HPA	testis; pachytene spermatocytes[High]	HPA:0570763	0.000150118	3.82357	854	23	FUS,HNRNPUL1,ALYREF,SF3B2,CPSF6,SAPS3,WTAP,SPAG9,PEX5,ADSL,PGAM5,AKAP8L,TRA2B,TUBB,CGGBP1,YBX3,SRSF6,HNRNPA3,HNRNPD,CBLL1,ILF2,TUFM,HSPA1B
HPA	testis; sertoli cells[‚â•Low]	HPA:0570801	0.000151433	3.81978	2279	41	AIMP1,CHMP4B,ANKRD50,SNRPD1,FUS,HNRNPUL1,CALD1,CGN,ALYREF,LMNA,CPSF6,SAPS3,WTAP,SPAG9,RIPK2,LUZP1,CCDC47,PEX5,ADSL,TJP2,TJP1,CGNL1,AKAP8L,GJA1,TRA2B,TUBB,CGGBP1,AIMP2,CCT4,SRSF6,PCM1,HMGN1,MAP4,RPS27A,JUP,TACC2,RBMX,HNRNPA3,ILF2,SNRPD3,TUFM
HPA	salivary gland; glandular cells[High]	HPA:0420053	0.000164549	3.7837	1443	31	FUS,GAPDH,HNRNPUL1,ALYREF,SF3B2,LMNA,IFT20,CPSF6,LUZP1,CCDC47,PEX5,ADSL,TBC1D4,CGNL1,TRA2B,CGGBP1,SRSF6,HMGN1,RPS27A,JUP,TPM4,RBMX,HNRNPAB,HNRNPD,ILF2,RPL24,TUFM,RPS20,RBM14,HNRNPF,BTF3
HPA	lymph node; germinal center cells[High]	HPA:0310433	0.000176051	3.75436	930	24	FUS,HNRNPUL1,ALYREF,YBX1,CPSF6,SAPS3,TACC3,PEX5,ADSL,TRA2B,TUBB,CGGBP1,YWHAZ,HMGN1,HNRNPAB,HNRNPA3,HNRNPD,CFL1,CBLL1,ILF2,RPL24,TUFM,RPS20,RBM14
HPA	caudate; glial cells[High]	HPA:0080123	0.00018395	3.7353	669	20	FUS,HNRNPUL1,ALYREF,SF3B2,LMNA,CPSF6,ADSL,TRA2B,YWHAZ,SRSF6,HMGN1,MAP4,RPS27A,HNRNPAB,HNRNPA3,HNRNPD,ILF2,RPL24,SNRPD3,RBM14
HPA	urinary bladder; urothelial cells[‚â•Medium]	HPA:0610832	0.000198986	3.70118	5873	74	AIMP1,ANKRD50,SNRPD1,RBM3,PDLIM5,FUS,RPL18A,RPS6,CHMP5,GAPDH,HNRNPUL1,CGN,ALYREF,SF3B2,LMNA,YBX1,IFT20,CPSF6,SAPS3,WTAP,INF2,SPAG9,RIPK2,LUZP1,CCDC47,PEX5,ADSL,TJP2,TBC1D4,PGAM5,AKAP8L,GJA1,RPL11,TRA2B,TUBB,CGGBP1,CCDC6,AIMP2,DDB1,YWHAZ,CCT4,SRSF6,TXN,PCM1,HMGN1,MAP4,RPS27A,JUP,TPM4,TPM3,DBN1,TACC2,MYL6,RBMX,HNRNPAB,HNRNPA3,PCMT1,HNRNPD,CBLL1,RPL13,ILF2,RPL24,SNRPD3,TUFM,RPL23A,RPS20,HSPA1B,RBM14…
HPA	tonsil; squamous epithelial cells[‚â•Medium]	HPA:0600222	0.000199008	3.70113	4887	66	AIMP1,ANKRD50,SNRPD1,RBM3,FUS,RPL18A,RPS6,GAPDH,HNRNPUL1,ALYREF,SF3B2,LMNA,YBX1,IFT20,CPSF6,SAPS3,WTAP,SPAG9,LUZP1,CCDC47,PEX5,ADSL,TJP2,TBC1D4,PGAM5,AKAP8L,GJA1,RPL11,TRA2B,TUBB,CGGBP1,YBX3,CCDC6,AIMP2,DDB1,YWHAZ,SRSF6,TXN,PCM1,HMGN1,MAP4,RPS27A,DSP,JUP,TPM4,TPM3,MYL6,RBMX,HNRNPAB,HNRNPA3,HNRNPD,CBLL1,DLAT,RPL13,ILF2,RPL24,TUFM,RPS20,SBSN,HSPA1B,RBM14,SLC25A6,HNRNPF,RSL1D1,BTF3,TRIM21
HPA	cervix, uterine; squamous epithelial cells[High]	HPA:0110223	0.000201475	3.69578	1007	25	FUS,RPS6,HNRNPUL1,SF3B2,LMNA,CPSF6,GJA1,TRA2B,YWHAZ,SRSF6,HMGN1,MAP4,RPS27A,JUP,TPM4,RBMX,HNRNPAB,HNRNPA3,HNRNPD,CBLL1,TUFM,RPS20,HSPA1B,HNRNPF,RSL1D1
HPA	skin 1; keratinocytes[High]	HPA:0460663	0.000203398	3.69165	869	23	FUS,GAPDH,HNRNPUL1,ALYREF,SF3B2,LMNA,CPSF6,GJA1,TRA2B,YWHAZ,SRSF6,HMGN1,RPS27A,DSP,JUP,RBMX,HNRNPAB,HNRNPA3,ILF2,TUFM,HSPA1B,HNRNPF,RSL1D1
HPA	caudate; neuronal cells[High]	HPA:0080133	0.000218236	3.66107	1083	26	AIMP1,SNRPD1,FUS,RPS6,HNRNPUL1,ALYREF,SF3B2,CPSF6,AKAP8L,TRA2B,SNRPN,CGGBP1,DDB1,YWHAZ,SRSF6,RBMX,HNRNPAB,HNRNPD,ILF2,RPL24,SNRPD3,RPS20,HSPA1B,HNRNPF,RSL1D1,BTF3
HPA	breast; myoepithelial cells[High]	HPA:0050093	0.00028844	3.53994	819	22	ANKRD50,FUS,HNRNPUL1,ALYREF,SF3B2,LMNA,CPSF6,WTAP,TBC1D4,TRA2B,CGGBP1,YWHAZ,SRSF6,MYH11,TPM4,HNRNPAB,HNRNPA3,ILF2,TUFM,RPS20,RBM14,RSL1D1
HPA	lung; alveolar cells[‚â•Low]	HPA:0301171	0.00037308	3.4282	5077	67	AIMP1,ANKRD50,SNRPD1,RBM3,FUS,RPL18A,RPS6,GAPDH,HNRNPUL1,CALD1,CGN,ALYREF,SF3B2,LMNA,YBX1,IFT20,CPSF6,SAPS3,SLC39A10,WTAP,INF2,SPAG9,FBLN2,LUZP1,CCDC47,PEX5,ADSL,TJP2,TBC1D4,TJP1,CGNL1,PGAM5,AKAP8L,GJA1,TRA2B,TUBB,CGGBP1,AIMP2,YWHAZ,SRSF6,TXN,PCM1,HMGN1,RPS27A,JUP,TPM4,TPM3,TACC2,MYL6,RBMX,HNRNPAB,HNRNPA3,PCMT1,HNRNPD,CFL1,CBLL1,ILF2,RPL24,SNRPD3,TUFM,RPL23A,RPS20,RBM14,SLC25A6,HNRNPF,BTF3,TRIM21
HPA	bronchus; respiratory epithelial cells[High]	HPA:0060103	0.000387598	3.41162	1916	36	FUS,RPS6,HNRNPUL1,CGN,ALYREF,SF3B2,LMNA,IFT20,CPSF6,SAPS3,WTAP,CCDC47,PEX5,ADSL,AKAP8L,TRA2B,TUBB,CGGBP1,YWHAZ,SRSF6,HMGN1,RPS27A,JUP,TPM4,RBMX,HNRNPAB,HNRNPA3,DLAT,ILF2,RPL24,SNRPD3,HSPA1B,RBM14,HNRNPF,RSL1D1,TRIM21
HPA	cerebellum; cells in molecular layer[High]	HPA:0090193	0.000409712	3.38752	905	23	FUS,HNRNPUL1,ALYREF,SF3B2,LMNA,CPSF6,WTAP,ADSL,TRA2B,CGGBP1,SRSF6,HMGN1,RPS27A,RBMX,HNRNPAB,HNRNPA3,HNRNPD,DLAT,ILF2,RPL24,RPS20,RBM14,HNRNPF
HPA	pancreas; exocrine glandular cells[‚â•Medium]	HPA:0350472	0.000424461	3.37216	5212	68	AIMP1,CHMP4B,ANKRD50,SNRPD1,RBM3,PDX1,FUS,RPL18A,RPS6,CHMP5,GAPDH,HNRNPUL1,CGN,ALYREF,SF3B2,LMNA,YBX1,IFT20,CPSF6,SAPS3,WTAP,INF2,SPAG9,RIPK2,LUZP1,CCDC47,PEX5,ADSL,TJP2,TBC1D4,TJP1,CGNL1,PGAM5,AKAP8L,RPL11,TRA2B,TUBB,CGGBP1,CCDC6,CBS,AIMP2,DDB1,SRSF6,TXN,HMGN1,MAP4,RPS27A,JUP,TPM4,RBMX,HNRNPAB,HNRNPA3,HNRNPD,CBLL1,DLAT,RPL13,ILF2,RPL24,SNRPD3,TUFM,RPS20,RBM14,RPS9,SLC25A6,HNRNPF,RSL1D1,BTF3,TRIM…
HPA	skin 1; fibroblasts[High]	HPA:0460653	0.000430573	3.36595	839	22	FUS,GAPDH,HNRNPUL1,ALYREF,IFT20,CPSF6,FBLN2,PEX5,TRA2B,CGGBP1,SRSF6,HMGN1,MAP4,RPS27A,TPM3,RBMX,HNRNPAB,HNRNPA3,ILF2,TUFM,HNRNPF,RSL1D1
HPA	endometrium 2; cells in endometrial stroma[‚â•Medium]	HPA:0170252	0.000439328	3.35721	1756	34	FUS,RPS6,HNRNPUL1,CALD1,ALYREF,SF3B2,LMNA,YBX1,IFT20,CPSF6,FBLN2,LUZP1,AKAP8L,GJA1,TRA2B,CGGBP1,YWHAZ,TXN,PCM1,HMGN1,MAP4,RPS27A,DBN1,RBMX,HNRNPAB,HNRNPD,RPL13,ILF2,RPL24,RPS20,HSPA1B,RBM14,HNRNPF,RSL1D1
HPA	cervix, uterine; squamous epithelial cells[‚â•Medium]	HPA:0110222	0.000541607	3.26632	3666	54	AIMP1,SNRPD1,RBM3,FUS,RPL18A,RPS6,HNRNPUL1,SF3B2,LMNA,YBX1,IFT20,CPSF6,SAPS3,WTAP,SPAG9,LUZP1,CCDC47,PEX5,ADSL,TBC1D4,PGAM5,AKAP8L,GJA1,TRA2B,CGGBP1,YBX3,DDB1,YWHAZ,SRSF6,TXN,PCM1,HMGN1,MAP4,RPS27A,JUP,TPM4,TPM3,TACC2,RBMX,HNRNPAB,HNRNPA3,HNRNPD,CBLL1,RPL13,RPL24,TUFM,RPS20,SBSN,HSPA1B,RBM14,SLC25A6,HNRNPF,RSL1D1,BTF3
HPA	ovary; ovarian stroma cells[‚â•Medium]	HPA:0340462	0.000563667	3.24898	2033	37	FUS,GAPDH,HNRNPUL1,CALD1,ALYREF,SF3B2,LMNA,YBX1,IFT20,CPSF6,SAPS3,WTAP,FBLN2,TBC1D4,AKAP8L,TRA2B,CGGBP1,YWHAZ,SRSF6,HMGN1,MAP4,MYH11,RPS27A,JUP,TPM3,RBMX,HNRNPAB,HNRNPA3,HNRNPD,RPL13,ILF2,RPL24,SNRPD3,TUFM,HSPA1B,RBM14,HNRNPF
HPA	vagina; squamous epithelial cells[‚â•Medium]	HPA:0620222	0.000581522	3.23543	3993	57	SNRPD1,FUS,RPL18A,RPS6,GAPDH,HNRNPUL1,ALYREF,SF3B2,LMNA,YBX1,IFT20,CPSF6,SAPS3,TACC3,WTAP,SPAG9,LUZP1,CCDC47,PEX5,ADSL,TBC1D4,PGAM5,AKAP8L,GJA1,TRA2B,CGGBP1,YBX3,DDB1,YWHAZ,SRSF6,TXN,PCM1,HMGN1,MAP4,RPS27A,DSP,JUP,TPM4,TPM3,TACC2,RBMX,HNRNPAB,HNRNPA3,HNRNPD,CBLL1,RPL13,ILF2,RPL24,SNRPD3,TUFM,RPS20,SBSN,HSPA1B,RBM14,HNRNPF,RSL1D1,BTF3
HPA	liver; cholangiocytes[High]	HPA:0291163	0.000589297	3.22967	314	13	FUS,HNRNPUL1,ALYREF,LMNA,TRA2B,YWHAZ,HMGN1,JUP,HNRNPAB,HNRNPA3,ILF2,BTF3,TRIM21
HPA	tonsil; non-germinal center cells[High]	HPA:0600443	0.000595302	3.22526	1294	28	FUS,RPS6,HNRNPUL1,ALYREF,SF3B2,LMNA,IFT20,CPSF6,SAPS3,WTAP,ADSL,TRA2B,CGGBP1,YWHAZ,SRSF6,HMGN1,RPS27A,RBMX,HNRNPAB,HNRNPA3,HNRNPD,CFL1,CBLL1,ILF2,RPL24,TUFM,RPS20,RBM14
HPA	cerebral cortex; glial cells[High]	HPA:0100123	0.000650821	3.18654	726	20	FUS,HNRNPUL1,ALYREF,SF3B2,LMNA,CPSF6,CCDC47,PEX5,AKAP8L,TRA2B,YWHAZ,SRSF6,HMGN1,RPS27A,HNRNPAB,HNRNPA3,HNRNPD,ILF2,RBM14,HNRNPF
HPA	pancreas; exocrine glandular cells[‚â•Low]	HPA:0350471	0.000740005	3.13077	6841	80	AIMP1,CHMP4B,ANKRD50,SNRPD1,RBM3,PDX1,FUS,RPL18A,RPS6,CHMP5,GAPDH,HNRNPUL1,CGN,ALYREF,SF3B2,LMNA,YBX1,IFT20,CPSF6,SAPS3,SLC39A10,WTAP,INF2,SPAG9,RIPK2,LUZP1,CCDC47,PEX5,ADSL,TJP2,TBC1D4,TJP1,CGNL1,PGAM5,AKAP8L,RPL11,TRA2B,PDE4C,TUBB,CGGBP1,YBX3,CCDC6,CBS,AIMP2,DDB1,YWHAZ,SRSF6,TXN,PCM1,HMGN1,MAP4,RPS27A,DSP,JUP,TPM4,TPM3,DBN1,TACC2,MYL6,RBMX,HNRNPAB,HNRNPA3,PCMT1,HNRNPD,CBLL1,DLAT,RPL13,ILF2,RPL2…
HPA	testis; pachytene spermatocytes[‚â•Medium]	HPA:0570762	0.000748804	3.12563	1713	33	SNRPD1,FUS,CHMP5,HNRNPUL1,ALYREF,SF3B2,CPSF6,SAPS3,WTAP,SPAG9,PEX5,ADSL,PGAM5,AKAP8L,TRA2B,TUBB,CGGBP1,YBX3,SRSF6,TPM1,TPM4,TPM3,HNRNPA3,HNRNPD,CBLL1,DLAT,ILF2,SNRPD3,TUFM,HSPA1B,RBM14,HNRNPF,RSL1D1
HPA	hippocampus; neuronal cells[High]	HPA:0250133	0.000806824	3.09322	1237	27	AIMP1,FUS,HNRNPUL1,ALYREF,LMNA,IFT20,CPSF6,CCDC47,PEX5,AKAP8L,TRA2B,CGGBP1,DDB1,YWHAZ,SRSF6,RBMX,HNRNPAB,HNRNPA3,HNRNPD,DLAT,RPL13,ILF2,RPL24,RPS20,HNRNPF,RSL1D1,BTF3
HPA	cerebellum; cells in granular layer[High]	HPA:0090183	0.000834816	3.07841	738	20	FUS,HNRNPUL1,ALYREF,SF3B2,LMNA,CPSF6,WTAP,ADSL,TRA2B,CGGBP1,SRSF6,HMGN1,RPS27A,RBMX,HNRNPAB,HNRNPA3,HNRNPD,ILF2,RBM14,HNRNPF
HPA	lung; alveolar cells[High]	HPA:0301173	0.000868754	3.0611	807	21	FUS,HNRNPUL1,ALYREF,SF3B2,LMNA,CPSF6,SAPS3,CCDC47,TRA2B,CGGBP1,SRSF6,HMGN1,RBMX,HNRNPAB,HNRNPA3,HNRNPD,ILF2,SNRPD3,TUFM,RBM14,TRIM21
HPA	rectum; glandular cells[High]	HPA:0400053	0.000973053	3.01186	2724	44	SNRPD1,FUS,RPS6,GAPDH,HNRNPUL1,CGN,ALYREF,SF3B2,LMNA,YBX1,CPSF6,SAPS3,WTAP,INF2,CCDC47,PEX5,ADSL,TBC1D4,AKAP8L,TRA2B,CGGBP1,DDB1,YWHAZ,SRSF6,TXN,HMGN1,JUP,TPM4,RBMX,HNRNPAB,HNRNPA3,HNRNPD,CFL1,RPL13,ILF2,RPL24,SNRPD3,TUFM,RBM14,SLC25A6,HNRNPF,RSL1D1,BTF3,TRIM21
HPA	breast; myoepithelial cells[‚â•Medium]	HPA:0050092	0.00103155	2.98651	3736	54	ANKRD50,SNRPD1,PDLIM5,FUS,RPS6,HNRNPUL1,CALD1,ALYREF,SF3B2,LMNA,YBX1,IFT20,CPSF6,SAPS3,WTAP,INF2,RIPK2,LUZP1,PEX5,TJP2,TBC1D4,PGAM5,AKAP8L,GJA1,RPL11,TRA2B,TUBB,CGGBP1,YWHAZ,SRSF6,TXN,MAP4,MYH11,RPS27A,JUP,TPM4,TPM3,TACC2,MYL6,RBMX,HNRNPAB,HNRNPA3,PCMT1,CBLL1,DLAT,RPL13,ILF2,RPL24,TUFM,RPS20,RBM14,HNRNPF,RSL1D1,BTF3
HPA	prostate; glandular cells[‚â•Medium]	HPA:0390052	0.0010501	2.97877	4730	63	AIMP1,CHMP4B,SNRPD1,PDLIM5,FUS,RPS6,CHMP5,GAPDH,HNRNPUL1,CGN,ALYREF,SF3B2,LMNA,YBX1,IFT20,CPSF6,SAPS3,SLC39A10,WTAP,INF2,RIPK2,LUZP1,CCDC47,PEX5,ADSL,TJP2,TBC1D4,CGNL1,PGAM5,AKAP8L,GJA1,RPL11,TRA2B,TUBB,CGGBP1,AIMP2,DDB1,YWHAZ,SRSF6,TXN,HMGN1,RPS27A,JUP,TPM4,TACC2,RBMX,HNRNPAB,HNRNPA3,HNRNPD,CBLL1,DLAT,RPL13,ILF2,RPL24,SNRPD3,TUFM,RPS20,HSPA1B,RBM14,RPS9,HNRNPF,RSL1D1,TRIM21
HPA	endometrium 2; cells in endometrial stroma[‚â•Low]	HPA:0170251	0.00133937	2.8731	3452	51	AIMP1,PDLIM5,FUS,RPS6,GAPDH,HNRNPUL1,CALD1,ALYREF,SF3B2,LMNA,YBX1,IFT20,CPSF6,SAPS3,RIPK2,FBLN2,LUZP1,CCDC47,PEX5,ADSL,TBC1D4,AKAP8L,GJA1,TRA2B,TUBB,CGGBP1,YWHAZ,TXN,PCM1,HMGN1,MAP4,RPS27A,JUP,DBN1,RBMX,HNRNPAB,HNRNPA3,HNRNPD,CBLL1,DLAT,RPL13,ILF2,RPL24,SNRPD3,TUFM,RPS20,HSPA1B,RBM14,HNRNPF,RSL1D1,BTF3
HPA	soft tissue 2; fibroblasts[‚â•Medium]	HPA:0510652	0.00149983	2.82396	2576	42	SNRPD1,FUS,RPS6,GAPDH,HNRNPUL1,ALYREF,SF3B2,YBX1,IFT20,CPSF6,SAPS3,WTAP,FBLN2,LUZP1,PEX5,PGAM5,AKAP8L,GJA1,TRA2B,TUBB,CGGBP1,YBX3,DDB1,YWHAZ,SRSF6,HMGN1,MAP4,RPS27A,TPM3,RBMX,HNRNPAB,HNRNPD,CFL1,CBLL1,ILF2,SNRPD3,TUFM,RPS20,RBM14,HNRNPF,RSL1D1,BTF3
HPA	endometrium 2; cells in endometrial stroma[High]	HPA:0170253	0.00174931	2.75713	347	13	FUS,HNRNPUL1,CALD1,ALYREF,LMNA,IFT20,FBLN2,GJA1,TRA2B,HMGN1,HNRNPAB,ILF2,RBM14
HPA	nasopharynx; respiratory epithelial cells[High]	HPA:0320103	0.00182921	2.73774	1870	34	FUS,RPS6,HNRNPUL1,CGN,ALYREF,SF3B2,LMNA,IFT20,CPSF6,SAPS3,WTAP,PEX5,ADSL,AKAP8L,TRA2B,TUBB,CGGBP1,YWHAZ,SRSF6,HMGN1,RPS27A,JUP,TPM4,RBMX,HNRNPAB,HNRNPA3,RPL13,ILF2,RPS20,HSPA1B,RBM14,HNRNPF,RSL1D1,TRIM21
HPA	testis; peritubular cells[‚â•Medium]	HPA:0570772	0.00191199	2.71851	462	15	ANKRD50,FUS,HNRNPUL1,CALD1,ALYREF,LMNA,CPSF6,RIPK2,AKAP8L,TRA2B,SRSF6,HMGN1,RBMX,CBLL1,ILF2
HPA	epididymis; glandular cells[High]	HPA:0180053	0.00227306	2.64339	1802	33	FUS,HNRNPUL1,ALYREF,SF3B2,LMNA,IFT20,CPSF6,SAPS3,WTAP,LUZP1,CCDC47,PEX5,TBC1D4,AKAP8L,TRA2B,TUBB,CGGBP1,YWHAZ,SRSF6,HMGN1,MAP4,JUP,RBMX,HNRNPAB,HNRNPA3,ILF2,RPL24,SNRPD3,TUFM,HSPA1B,HNRNPF,RSL1D1,TRIM21
HPA	cerebral cortex; neuronal cells[High]	HPA:0100133	0.00256082	2.59162	1812	33	AIMP1,FUS,RPS6,HNRNPUL1,ALYREF,SF3B2,LMNA,CPSF6,WTAP,SPAG9,LUZP1,CCDC47,PEX5,ADSL,TBC1D4,AKAP8L,TRA2B,DDB1,YWHAZ,SRSF6,RBMX,HNRNPAB,HNRNPA3,HNRNPD,CBLL1,DLAT,ILF2,RPL24,RPS20,RBM14,HNRNPF,RSL1D1,BTF3
HPA	prostate	HPA:0390000	0.00263902	2.57856	6586	77	AIMP1,CHMP4B,ANKRD50,SNRPD1,PDLIM5,FUS,RPL18A,RPS6,CHMP5,GAPDH,HNRNPUL1,CALD1,CGN,ALYREF,SF3B2,LMNA,YBX1,IFT20,CPSF6,SAPS3,SLC39A10,WTAP,INF2,RIPK2,LUZP1,CCDC47,PEX5,ADSL,TJP2,TBC1D4,TJP1,CGNL1,PGAM5,AKAP8L,GJA1,RPL11,TRA2B,TUBB,CGGBP1,YBX3,CCDC6,AIMP2,DDB1,YWHAZ,SRSF6,TXN,HMGN1,MAP4,RPS27A,JUP,TPM4,TPM3,DBN1,TACC2,MYL6,RBMX,HNRNPAB,HNRNPA3,PCMT1,HNRNPD,CFL1,CBLL1,DLAT,RPL13,ILF2,RPL24,SNRPD3,TUF…
HPA	prostate; glandular cells[‚â•Low]	HPA:0390051	0.00263902	2.57856	6586	77	AIMP1,CHMP4B,ANKRD50,SNRPD1,PDLIM5,FUS,RPL18A,RPS6,CHMP5,GAPDH,HNRNPUL1,CALD1,CGN,ALYREF,SF3B2,LMNA,YBX1,IFT20,CPSF6,SAPS3,SLC39A10,WTAP,INF2,RIPK2,LUZP1,CCDC47,PEX5,ADSL,TJP2,TBC1D4,TJP1,CGNL1,PGAM5,AKAP8L,GJA1,RPL11,TRA2B,TUBB,CGGBP1,YBX3,CCDC6,AIMP2,DDB1,YWHAZ,SRSF6,TXN,HMGN1,MAP4,RPS27A,JUP,TPM4,TPM3,DBN1,TACC2,MYL6,RBMX,HNRNPAB,HNRNPA3,PCMT1,HNRNPD,CFL1,CBLL1,DLAT,RPL13,ILF2,RPL24,SNRPD3,TUF…
HPA	skin 1; melanocytes[High]	HPA:0460673	0.00277601	2.55658	870	21	FUS,GAPDH,HNRNPUL1,ALYREF,SF3B2,IFT20,CPSF6,PEX5,ADSL,TRA2B,CGGBP1,SRSF6,HMGN1,RBMX,HNRNPAB,HNRNPA3,ILF2,TUFM,HSPA1B,HNRNPF,RSL1D1
HPA	testis; preleptotene spermatocytes[‚â•Medium]	HPA:0570782	0.00303672	2.5176	1328	27	SNRPD1,RBM3,FUS,HNRNPUL1,ALYREF,SF3B2,CPSF6,WTAP,RIPK2,ADSL,PGAM5,AKAP8L,TRA2B,CGGBP1,CCT4,SRSF6,RBMX,HNRNPA3,HNRNPD,CBLL1,DLAT,ILF2,SNRPD3,TUFM,RBM14,HNRNPF,RSL1D1
HPA	pancreas	HPA:0350000	0.00304127	2.51695	7305	82	AIMP1,CHMP4B,ANKRD50,SNRPD1,RBM3,PDX1,FUS,RPL18A,RPS6,CHMP5,GAPDH,HNRNPUL1,CALD1,CGN,ALYREF,SF3B2,LMNA,YBX1,IFT20,CPSF6,SAPS3,SLC39A10,WTAP,INF2,SPAG9,RIPK2,LUZP1,CCDC47,PEX5,ADSL,TJP2,TBC1D4,TJP1,CGNL1,PGAM5,AKAP8L,RPL11,TRA2B,PDE4C,TUBB,CGGBP1,YBX3,CCDC6,CBS,AIMP2,DDB1,YWHAZ,SRSF6,TXN,PCM1,HMGN1,MAP4,RPS27A,DSP,JUP,TPM4,TPM3,DBN1,TACC2,MYL6,RBMX,HNRNPAB,HNRNPA3,PCMT1,HNRNPD,CBLL1,DLAT,RPL13,ILF…
HPA	smooth muscle; smooth muscle cells[High]	HPA:0490693	0.00308041	2.51139	605	17	ANKRD50,FUS,CALD1,ALYREF,LMNA,CPSF6,TRA2B,CGGBP1,HMGN1,MYH11,RPS27A,TPM1,HNRNPAB,HNRNPA3,ILF2,HNRNPF,BTF3
HPA	ovary; ovarian stroma cells[High]	HPA:0340463	0.00356874	2.44749	371	13	FUS,HNRNPUL1,CALD1,ALYREF,LMNA,TRA2B,CGGBP1,HMGN1,HNRNPAB,HNRNPA3,ILF2,TUFM,RBM14
HPA	endometrium 2; glandular cells[‚â•Low]	HPA:0170051	0.00361751	2.44159	6627	77	AIMP1,CHMP4B,ANKRD50,SNRPD1,PDLIM5,FUS,RPL18A,RPS6,GAPDH,HNRNPUL1,CALD1,CGN,ALYREF,SF3B2,LMNA,YBX1,IFT20,CPSF6,SAPS3,TACC3,WTAP,INF2,SPAG9,RIPK2,LUZP1,CCDC47,PEX5,ADSL,TJP2,TBC1D4,TJP1,CGNL1,PGAM5,AKAP8L,GJA1,RPL11,TRA2B,PDE4C,TUBB,CGGBP1,CCDC6,AIMP2,DDB1,YWHAZ,CCT4,SRSF6,TXN,PCM1,HMGN1,MAP4,RPS27A,JUP,TPM4,TPM3,DBN1,TACC2,MYL6,RBMX,HNRNPAB,HNRNPA3,PCMT1,HNRNPD,CBLL1,DLAT,RPL13,ILF2,RPL24,SNRPD3,…
HPA	placenta; trophoblastic cells[High]	HPA:0380523	0.00416257	2.38064	2030	35	RPS6,HNRNPUL1,ALYREF,SF3B2,LMNA,IFT20,CPSF6,SAPS3,WTAP,INF2,SPAG9,RIPK2,CCDC47,AKAP8L,TRA2B,CGGBP1,YWHAZ,SRSF6,HMGN1,JUP,TACC2,RBMX,HNRNPAB,HNRNPA3,HNRNPD,CBLL1,ILF2,SNRPD3,TUFM,RPS20,RBM14,RPS9,HNRNPF,RSL1D1,TRIM21
HPA	smooth muscle; smooth muscle cells[‚â•Low]	HPA:0490691	0.00419397	2.37738	5374	67	AIMP1,CHMP4B,ANKRD50,SNRPD1,PDLIM5,FUS,RPL18A,RPS6,GAPDH,HNRNPUL1,CALD1,ALYREF,SF3B2,LMNA,YBX1,IFT20,CPSF6,SAPS3,SLC39A10,WTAP,RIPK2,FBLN2,LUZP1,PEX5,ADSL,TJP2,TBC1D4,TJP1,PGAM5,AKAP8L,TRA2B,CGGBP1,AIMP2,YWHAZ,SRSF6,TXN,HMGN1,MAP4,MYH11,RPS27A,TPM1,TPM4,TPM3,TACC2,MYL6,RBMX,HNRNPAB,HNRNPA3,PCMT1,HNRNPD,CFL1,CBLL1,DLAT,RPL13,ILF2,RPL24,SNRPD3,TUFM,RPL23A,RPS20,HSPA1B,RBM14,SLC25A6,HNRNPF,RSL1D1,BT…
HPA	smooth muscle	HPA:0490000	0.00419397	2.37738	5374	67	AIMP1,CHMP4B,ANKRD50,SNRPD1,PDLIM5,FUS,RPL18A,RPS6,GAPDH,HNRNPUL1,CALD1,ALYREF,SF3B2,LMNA,YBX1,IFT20,CPSF6,SAPS3,SLC39A10,WTAP,RIPK2,FBLN2,LUZP1,PEX5,ADSL,TJP2,TBC1D4,TJP1,PGAM5,AKAP8L,TRA2B,CGGBP1,AIMP2,YWHAZ,SRSF6,TXN,HMGN1,MAP4,MYH11,RPS27A,TPM1,TPM4,TPM3,TACC2,MYL6,RBMX,HNRNPAB,HNRNPA3,PCMT1,HNRNPD,CFL1,CBLL1,DLAT,RPL13,ILF2,RPL24,SNRPD3,TUFM,RPL23A,RPS20,HSPA1B,RBM14,SLC25A6,HNRNPF,RSL1D1,BT…
HPA	salivary gland; glandular cells[‚â•Medium]	HPA:0420052	0.00431303	2.36522	4789	62	AIMP1,PDLIM5,FUS,RPL18A,RPS6,GAPDH,HNRNPUL1,CGN,ALYREF,SF3B2,LMNA,IFT20,CPSF6,SAPS3,INF2,RIPK2,LUZP1,CCDC47,PEX5,ADSL,TJP2,TBC1D4,TJP1,CGNL1,PGAM5,AKAP8L,RPL11,TRA2B,TUBB,CGGBP1,CCDC6,DDB1,YWHAZ,SRSF6,TXN,PCM1,HMGN1,RPS27A,JUP,TPM4,TPM3,DBN1,TACC2,MYL6,RBMX,HNRNPAB,HNRNPA3,HNRNPD,CBLL1,DLAT,RPL13,ILF2,RPL24,TUFM,RPL23A,RPS20,HSPA1B,RBM14,RPS9,HNRNPF,RSL1D1,BTF3
HPA	endometrium 1; glandular cells[High]	HPA:0160053	0.00432643	2.36387	1435	28	FUS,HNRNPUL1,ALYREF,SF3B2,LMNA,IFT20,CPSF6,SAPS3,RIPK2,TRA2B,CGGBP1,YWHAZ,SRSF6,HMGN1,RPS27A,JUP,TPM4,RBMX,HNRNPAB,HNRNPD,ILF2,RPL24,TUFM,RPS20,RBM14,RSL1D1,BTF3,TRIM21
HPA	cervix, uterine; squamous epithelial cells[‚â•Low]	HPA:0110221	0.00449305	2.34746	5383	67	AIMP1,CHMP4B,ANKRD50,SNRPD1,RBM3,PDLIM5,FUS,RPL18A,RPS6,GAPDH,HNRNPUL1,CALD1,SF3B2,LMNA,YBX1,IFT20,CPSF6,SAPS3,SLC39A10,WTAP,INF2,SPAG9,LUZP1,CCDC47,PEX5,ADSL,TJP2,TBC1D4,TJP1,PGAM5,AKAP8L,GJA1,TRA2B,TUBB,CGGBP1,YBX3,CCDC6,AIMP2,DDB1,YWHAZ,SRSF6,TXN,PCM1,HMGN1,MAP4,RPS27A,JUP,TPM4,TPM3,TACC2,RBMX,HNRNPAB,HNRNPA3,HNRNPD,CBLL1,DLAT,RPL13,RPL24,TUFM,RPS20,SBSN,HSPA1B,RBM14,SLC25A6,HNRNPF,RSL1D1,BTF3
HPA	appendix; lymphoid tissue[‚â•Medium]	HPA:0030072	0.00455559	2.34145	3180	47	AIMP1,SNRPD1,FUS,RPS6,HNRNPUL1,SF3B2,LMNA,YBX1,IFT20,CPSF6,SAPS3,TACC3,WTAP,PEX5,ADSL,TBC1D4,PGAM5,AKAP8L,TRA2B,TUBB,CGGBP1,CCDC6,AIMP2,DDB1,YWHAZ,SRSF6,HMGN1,MAP4,TPM4,MYL6,RBMX,HNRNPA3,PCMT1,HNRNPD,CFL1,CBLL1,RPL13,ILF2,RPL24,SNRPD3,TUFM,RPS20,RBM14,SLC25A6,HNRNPF,RSL1D1,BTF3
HPA	skin 2	HPA:0470000	0.0048997	2.30983	6667	77	AIMP1,CHMP4B,SNRPD1,RBM3,PDLIM5,FUS,RPL18A,RPS6,GAPDH,HNRNPUL1,KPRP,ALYREF,SF3B2,LMNA,YBX1,IFT20,CPSF6,SAPS3,SLC39A10,TACC3,WTAP,SPAG9,LUZP1,CCDC47,PEX5,ADSL,TJP2,TBC1D4,TJP1,PGAM5,AKAP8L,GJA1,RPL11,TRA2B,TUBB,CGGBP1,YBX3,CCDC6,AIMP2,DDB1,YWHAZ,CCT4,SRSF6,TXN,PCM1,HMGN1,MAP4,RPS27A,DSP,JUP,TPM4,TPM3,TACC2,RBMX,HNRNPAB,HNRNPA3,PCMT1,HNRNPD,CFL1,CBLL1,DLAT,RPL13,ILF2,RPL24,SNRPD3,TUFM,RPL23A,RPS20,…
HPA	skin 2; epidermal cells[‚â•Low]	HPA:0470681	0.0048997	2.30983	6667	77	AIMP1,CHMP4B,SNRPD1,RBM3,PDLIM5,FUS,RPL18A,RPS6,GAPDH,HNRNPUL1,KPRP,ALYREF,SF3B2,LMNA,YBX1,IFT20,CPSF6,SAPS3,SLC39A10,TACC3,WTAP,SPAG9,LUZP1,CCDC47,PEX5,ADSL,TJP2,TBC1D4,TJP1,PGAM5,AKAP8L,GJA1,RPL11,TRA2B,TUBB,CGGBP1,YBX3,CCDC6,AIMP2,DDB1,YWHAZ,CCT4,SRSF6,TXN,PCM1,HMGN1,MAP4,RPS27A,DSP,JUP,TPM4,TPM3,TACC2,RBMX,HNRNPAB,HNRNPA3,PCMT1,HNRNPD,CFL1,CBLL1,DLAT,RPL13,ILF2,RPL24,SNRPD3,TUFM,RPL23A,RPS20,…
HPA	lymph node; non-germinal center cells[‚â•Medium]	HPA:0310442	0.00525612	2.27934	3925	54	AIMP1,CHMP4B,FUS,RPS6,GAPDH,HNRNPUL1,ALYREF,SF3B2,LMNA,YBX1,IFT20,CPSF6,SAPS3,TACC3,WTAP,LUZP1,CCDC47,PEX5,ADSL,TJP2,TBC1D4,PGAM5,AKAP8L,TRA2B,TUBB,CGGBP1,DDB1,YWHAZ,CCT4,SRSF6,TXN,HMGN1,MAP4,RPS27A,TPM4,DBN1,MYL6,RBMX,HNRNPAB,HNRNPA3,HNRNPD,CFL1,CBLL1,DLAT,ILF2,RPL24,SNRPD3,TUFM,RPS20,RBM14,HNRNPF,RSL1D1,BTF3,TRIM21
HPA	appendix; lymphoid tissue[High]	HPA:0030073	0.00526843	2.27832	836	20	FUS,HNRNPUL1,SF3B2,YBX1,IFT20,CPSF6,SAPS3,TACC3,PEX5,ADSL,TBC1D4,PGAM5,TRA2B,CGGBP1,DDB1,HNRNPD,ILF2,TUFM,RPS20,RSL1D1
HPA	endometrium 2	HPA:0170000	0.00533016	2.27326	6814	78	AIMP1,CHMP4B,ANKRD50,SNRPD1,PDLIM5,FUS,RPL18A,RPS6,GAPDH,HNRNPUL1,CALD1,CGN,ALYREF,SF3B2,LMNA,YBX1,IFT20,CPSF6,SAPS3,TACC3,WTAP,INF2,SPAG9,RIPK2,FBLN2,LUZP1,CCDC47,PEX5,ADSL,TJP2,TBC1D4,TJP1,CGNL1,PGAM5,AKAP8L,GJA1,RPL11,TRA2B,PDE4C,TUBB,CGGBP1,CCDC6,AIMP2,DDB1,YWHAZ,CCT4,SRSF6,TXN,PCM1,HMGN1,MAP4,RPS27A,JUP,TPM4,TPM3,DBN1,TACC2,MYL6,RBMX,HNRNPAB,HNRNPA3,PCMT1,HNRNPD,CBLL1,DLAT,RPL13,ILF2,RPL24,S…
HPA	duodenum; glandular cells[High]	HPA:0150053	0.00568053	2.24561	2808	43	CHMP4B,PDX1,FUS,RPS6,HNRNPUL1,CGN,ALYREF,SF3B2,LMNA,YBX1,CPSF6,SAPS3,WTAP,LUZP1,CCDC47,PEX5,ADSL,TBC1D4,AKAP8L,TRA2B,CGGBP1,YWHAZ,SRSF6,TXN,HMGN1,JUP,TPM4,RBMX,HNRNPAB,HNRNPA3,HNRNPD,CFL1,RPL13,ILF2,RPL24,TUFM,RPS20,RBM14,RPS9,HNRNPF,RSL1D1,BTF3,TRIM21
HPA	gallbladder; glandular cells[High]	HPA:0220053	0.0058406	2.23354	2811	43	FUS,RPS6,HNRNPUL1,CGN,ALYREF,SF3B2,LMNA,IFT20,CPSF6,SAPS3,WTAP,INF2,RIPK2,LUZP1,CCDC47,PEX5,TBC1D4,AKAP8L,TRA2B,CGGBP1,DDB1,YWHAZ,SRSF6,TXN,HMGN1,RPS27A,JUP,TPM4,RBMX,HNRNPAB,HNRNPA3,HNRNPD,CBLL1,RPL13,ILF2,RPL24,SNRPD3,TUFM,RPS20,RPS9,HNRNPF,BTF3,TRIM21
HPA	testis; round or early spermatids[High]	HPA:0570793	0.00612286	2.21305	917	21	FUS,HNRNPUL1,ALYREF,SF3B2,SPAG9,ADSL,AKAP8L,TRA2B,TUBB,YBX3,SRSF6,PCM1,TPM1,TPM4,TPM3,HNRNPA3,HNRNPD,ILF2,TUFM,HSPA1B,RBM14
HPA	testis; peritubular cells[‚â•Low]	HPA:0570771	0.00621335	2.20667	639	17	ANKRD50,FUS,HNRNPUL1,CALD1,ALYREF,LMNA,CPSF6,RIPK2,PEX5,AKAP8L,TRA2B,SRSF6,HMGN1,RBMX,HNRNPA3,CBLL1,ILF2
HPA	cervix, uterine	HPA:0110000	0.00628493	2.2017	6836	78	AIMP1,CHMP4B,ANKRD50,SNRPD1,RBM3,PDLIM5,FUS,RPL18A,RPS6,GAPDH,HNRNPUL1,CALD1,CGN,ALYREF,SF3B2,LMNA,YBX1,IFT20,CPSF6,SAPS3,SLC39A10,WTAP,INF2,SPAG9,RIPK2,LUZP1,CCDC47,PEX5,ADSL,TJP2,TBC1D4,TJP1,PGAM5,AKAP8L,GJA1,RPL11,TRA2B,TUBB,CGGBP1,YBX3,CCDC6,AIMP2,DDB1,YWHAZ,CCT4,SRSF6,TXN,PCM1,HMGN1,MAP4,RPS27A,JUP,TPM4,TPM3,TACC2,RBMX,HNRNPAB,HNRNPA3,PCMT1,HNRNPD,CFL1,CBLL1,DLAT,RPL13,ILF2,RPL24,SNRPD3,TUFM…
HPA	pancreas; pancreatic endocrine cells[High]	HPA:0351183	0.00643407	2.19151	777	19	PDX1,FUS,HNRNPUL1,ALYREF,SF3B2,LMNA,CPSF6,TBC1D4,AKAP8L,TRA2B,CGGBP1,HMGN1,TPM4,HNRNPAB,HNRNPA3,ILF2,SNRPD3,TUFM,HNRNPF
HPA	prostate; glandular cells[High]	HPA:0390053	0.00647169	2.18898	1304	26	FUS,HNRNPUL1,ALYREF,SF3B2,LMNA,IFT20,CPSF6,SAPS3,TBC1D4,GJA1,TRA2B,CGGBP1,YWHAZ,SRSF6,HMGN1,RPS27A,JUP,HNRNPAB,HNRNPA3,HNRNPD,ILF2,SNRPD3,TUFM,HSPA1B,RBM14,HNRNPF
HPA	testis; preleptotene spermatocytes[High]	HPA:0570783	0.00659385	2.18086	642	17	SNRPD1,FUS,HNRNPUL1,ALYREF,SF3B2,CPSF6,ADSL,AKAP8L,TRA2B,CCT4,RBMX,HNRNPA3,HNRNPD,ILF2,TUFM,HNRNPF,RSL1D1
HPA	testis; round or early spermatids[‚â•Medium]	HPA:0570792	0.0069223	2.15975	1725	31	SNRPD1,FUS,CHMP5,HNRNPUL1,ALYREF,SF3B2,LMNA,CPSF6,SPAG9,PEX5,ADSL,PGAM5,AKAP8L,TRA2B,TUBB,YBX3,CCT4,SRSF6,PCM1,TPM1,TPM4,TPM3,HNRNPA3,HNRNPD,CBLL1,DLAT,ILF2,SNRPD3,TUFM,HSPA1B,RBM14
HPA	stomach 2; glandular cells[‚â•Medium]	HPA:0550052	0.00701881	2.15374	6189	73	AIMP1,CHMP4B,ANKRD50,SNRPD1,PDLIM5,FUS,RPL18A,RPS6,CHMP5,GAPDH,HNRNPUL1,CGN,ALYREF,SF3B2,LMNA,YBX1,IFT20,CPSF6,SAPS3,WTAP,INF2,SPAG9,LUZP1,CCDC47,PEX5,ADSL,TJP2,TBC1D4,TJP1,CGNL1,PGAM5,AKAP8L,RPL11,TRA2B,PDE4C,TUBB,CGGBP1,YBX3,CCDC6,AIMP2,DDB1,YWHAZ,SRSF6,TXN,HMGN1,RPS27A,JUP,TPM4,TPM3,DBN1,TACC2,RBMX,HNRNPAB,HNRNPA3,PCMT1,HNRNPD,CFL1,CBLL1,DLAT,RPL13,ILF2,RPL24,SNRPD3,TUFM,RPL23A,RPS20,HSPA1B,RB…
HPA	cervix, uterine; glandular cells[High]	HPA:0110053	0.00762156	2.11796	1158	24	FUS,HNRNPUL1,ALYREF,SF3B2,LMNA,CPSF6,SAPS3,PEX5,ADSL,TRA2B,CGGBP1,YWHAZ,SRSF6,HMGN1,RPS27A,RBMX,HNRNPAB,HNRNPA3,HNRNPD,ILF2,HSPA1B,RBM14,RPS9,RSL1D1
HPA	appendix; glandular cells[‚â•Medium]	HPA:0030052	0.00762385	2.11783	5821	70	AIMP1,CHMP4B,ANKRD50,SNRPD1,RBM3,PDLIM5,FUS,RPL18A,RPS6,CHMP5,HNRNPUL1,CGN,ALYREF,SF3B2,LMNA,YBX1,IFT20,CPSF6,SAPS3,TACC3,WTAP,INF2,SPAG9,LUZP1,CCDC47,PEX5,ADSL,TJP2,TBC1D4,PGAM5,AKAP8L,RPL11,TRA2B,TUBB,CGGBP1,CCDC6,AIMP2,DDB1,YWHAZ,SRSF6,TXN,PCM1,HMGN1,MAP4,RPS27A,JUP,TPM4,TACC2,MYL6,RBMX,HNRNPAB,HNRNPA3,HNRNPD,CFL1,CBLL1,DLAT,RPL13,ILF2,RPL24,SNRPD3,TUFM,RPL23A,RPS20,RBM14,RPS9,SLC25A6,HNRNPF,R…
HPA	testis; round or early spermatids[‚â•Low]	HPA:0570791	0.00797263	2.0984	2091	35	SNRPD1,FUS,CHMP5,HNRNPUL1,ALYREF,SF3B2,LMNA,CPSF6,WTAP,SPAG9,RIPK2,PEX5,ADSL,PGAM5,AKAP8L,TRA2B,TUBB,SRSF12,YBX3,AIMP2,CCT4,SRSF6,PCM1,TPM1,TPM4,TPM3,HNRNPA3,HNRNPD,CBLL1,DLAT,ILF2,SNRPD3,TUFM,HSPA1B,RBM14
HPA	soft tissue 1; fibroblasts[‚â•Low]	HPA:0500651	0.00797853	2.09808	4194	56	AIMP1,SNRPD1,FUS,RPL18A,RPS6,HNRNPUL1,CALD1,ALYREF,SF3B2,LMNA,YBX1,IFT20,CPSF6,SAPS3,WTAP,FBLN2,LUZP1,PEX5,ADSL,PGAM5,AKAP8L,GJA1,RPL11,TRA2B,CGGBP1,YBX3,CCDC6,AIMP2,DDB1,YWHAZ,SRSF6,TXN,HMGN1,MAP4,JUP,TPM4,TPM3,TACC2,RBMX,HNRNPAB,HNRNPA3,HNRNPD,CFL1,CBLL1,DLAT,RPL13,ILF2,SNRPD3,TUFM,RPS20,RBM14,RPS9,HNRNPF,RSL1D1,BTF3,TRIM21
HPA	rectum; glandular cells[‚â•Medium]	HPA:0400052	0.00807785	2.0927	6468	75	AIMP1,CHMP4B,ANKRD50,SNRPD1,RBM3,PDLIM5,FUS,RPL18A,RPS6,CHMP5,GAPDH,HNRNPUL1,CGN,ALYREF,SF3B2,LMNA,YBX1,IFT20,CPSF6,SAPS3,TACC3,WTAP,INF2,SPAG9,RIPK2,LUZP1,CCDC47,PEX5,ADSL,TJP2,TBC1D4,TJP1,PGAM5,AKAP8L,RPL11,TRA2B,TUBB,CGGBP1,YBX3,CCDC6,AIMP2,DDB1,YWHAZ,SRSF6,TXN,PCM1,HMGN1,MAP4,RPS27A,JUP,TPM4,TPM3,TACC2,MYL6,RBMX,HNRNPAB,HNRNPA3,HNRNPD,CFL1,CBLL1,DLAT,RPL13,ILF2,RPL24,SNRPD3,TUFM,RPL23A,RPS20,…
HPA	pancreas; exocrine glandular cells[High]	HPA:0350473	0.00813636	2.08957	1914	33	ANKRD50,SNRPD1,FUS,RPS6,GAPDH,HNRNPUL1,ALYREF,SF3B2,LMNA,IFT20,CPSF6,SAPS3,WTAP,SPAG9,CCDC47,AKAP8L,TRA2B,CGGBP1,SRSF6,HMGN1,JUP,HNRNPAB,HNRNPA3,HNRNPD,RPL13,ILF2,RPL24,SNRPD3,TUFM,RPS20,RBM14,RPS9,HNRNPF
HPA	ovary	HPA:0340000	0.00852246	2.06944	5348	66	AIMP1,CHMP4B,FUS,RPL18A,RPS6,GAPDH,HNRNPUL1,CALD1,CGN,ALYREF,SF3B2,LMNA,YBX1,IFT20,CPSF6,SAPS3,WTAP,FBLN2,LUZP1,PEX5,ADSL,TJP2,TBC1D4,TJP1,PGAM5,AKAP8L,TRA2B,TUBB,CGGBP1,CCDC6,AIMP2,DDB1,YWHAZ,CCT4,SRSF6,TXN,PCM1,HMGN1,MAP4,MYH11,RPS27A,DSP,JUP,TPM4,TPM3,DBN1,TACC2,RBMX,HNRNPAB,HNRNPA3,PCMT1,HNRNPD,CFL1,CBLL1,RPL13,ILF2,RPL24,SNRPD3,TUFM,RPS20,HSPA1B,RBM14,HNRNPF,RSL1D1,BTF3,TRIM21
HPA	lymph node; germinal center cells[‚â•Medium]	HPA:0310432	0.008912	2.05002	3257	47	AIMP1,CHMP4B,SNRPD1,RBM3,FUS,HNRNPUL1,ALYREF,LMNA,YBX1,IFT20,CPSF6,SAPS3,TACC3,WTAP,RIPK2,LUZP1,PEX5,ADSL,TJP2,TBC1D4,PGAM5,AKAP8L,GJA1,RPL11,TRA2B,TUBB,CGGBP1,DDB1,YWHAZ,CCT4,HMGN1,MAP4,RPS27A,HNRNPAB,HNRNPA3,HNRNPD,CFL1,CBLL1,DLAT,ILF2,RPL24,SNRPD3,TUFM,RPS20,RBM14,HNRNPF,BTF3
HPA	small intestine; glandular cells[High]	HPA:0480053	0.00910031	2.04094	2762	42	CHMP4B,FUS,RPS6,HNRNPUL1,CGN,ALYREF,SF3B2,LMNA,YBX1,IFT20,CPSF6,SAPS3,LUZP1,CCDC47,PEX5,ADSL,TBC1D4,TRA2B,CGGBP1,YWHAZ,SRSF6,TXN,HMGN1,MAP4,RPS27A,JUP,TPM4,RBMX,HNRNPAB,HNRNPA3,HNRNPD,CFL1,RPL13,ILF2,RPL24,SNRPD3,TUFM,RBM14,RPS9,HNRNPF,RSL1D1,BTF3
HPA	skin 1; Langerhans[‚â•Medium]	HPA:0460642	0.00916391	2.03792	3159	46	SNRPD1,RBM3,FUS,RPS6,GAPDH,HNRNPUL1,ALYREF,SF3B2,LMNA,YBX1,IFT20,CPSF6,SAPS3,WTAP,PEX5,PGAM5,AKAP8L,GJA1,TRA2B,CGGBP1,AIMP2,DDB1,YWHAZ,SRSF6,TXN,HMGN1,MAP4,RPS27A,DSP,JUP,TPM4,TACC2,RBMX,HNRNPAB,HNRNPA3,CBLL1,RPL13,ILF2,TUFM,RPS20,HSPA1B,RBM14,SLC25A6,HNRNPF,RSL1D1,BTF3
HPA	skin 1; keratinocytes[‚â•Low]	HPA:0460661	0.00980991	2.00833	6107	72	AIMP1,CHMP4B,ANKRD50,SNRPD1,RBM3,PDLIM5,FUS,RPL18A,RPS6,GAPDH,HNRNPUL1,KPRP,ALYREF,SF3B2,LMNA,YBX1,IFT20,CPSF6,SAPS3,SLC39A10,WTAP,INF2,RIPK2,LUZP1,CCDC47,PEX5,ADSL,TJP2,TBC1D4,TJP1,PGAM5,AKAP8L,GJA1,RPL11,TRA2B,TUBB,CGGBP1,YBX3,CCDC6,AIMP2,DDB1,YWHAZ,SRSF6,TXN,PCM1,HMGN1,MAP4,RPS27A,DSP,JUP,TPM4,TPM3,TACC2,MYL6,RBMX,HNRNPAB,HNRNPA3,HNRNPD,CBLL1,RPL13,ILF2,RPL24,SNRPD3,TUFM,RPL23A,RPS20,SBSN,HSPA…
HPA	endometrium 1; cells in endometrial stroma[‚â•Low]	HPA:0160251	0.0103128	1.98662	4009	54	AIMP1,PDLIM5,FUS,RPS6,GAPDH,HNRNPUL1,CALD1,ALYREF,SF3B2,LMNA,YBX1,IFT20,CPSF6,SAPS3,TACC3,FBLN2,LUZP1,ADSL,TBC1D4,PGAM5,AKAP8L,GJA1,RPL11,TRA2B,CGGBP1,YBX3,AIMP2,YWHAZ,SRSF6,HMGN1,MAP4,RPS27A,TPM4,TPM3,DBN1,TACC2,RBMX,HNRNPAB,HNRNPA3,PCMT1,HNRNPD,CBLL1,DLAT,RPL13,ILF2,RPL24,SNRPD3,TUFM,RPS20,RBM14,SLC25A6,HNRNPF,RSL1D1,BTF3
HPA	seminal vesicle; glandular cells[High]	HPA:0430053	0.011591	1.93588	1431	27	FUS,HNRNPUL1,ALYREF,LMNA,CPSF6,SAPS3,CCDC47,AKAP8L,TRA2B,CGGBP1,DDB1,YWHAZ,SRSF6,HMGN1,JUP,TPM4,HNRNPAB,HNRNPA3,HNRNPD,ILF2,RPL24,TUFM,HSPA1B,HNRNPF,RSL1D1,BTF3,TRIM21
HPA	endometrium 2; glandular cells[‚â•Medium]	HPA:0170052	0.0116979	1.93189	4805	61	AIMP1,CHMP4B,PDLIM5,FUS,RPS6,HNRNPUL1,CGN,ALYREF,SF3B2,LMNA,YBX1,IFT20,CPSF6,SAPS3,WTAP,SPAG9,RIPK2,LUZP1,CCDC47,PEX5,ADSL,TJP2,TJP1,CGNL1,PGAM5,AKAP8L,RPL11,TRA2B,PDE4C,TUBB,CGGBP1,DDB1,YWHAZ,SRSF6,TXN,PCM1,HMGN1,MAP4,RPS27A,JUP,TPM4,DBN1,TACC2,MYL6,RBMX,HNRNPAB,HNRNPD,CBLL1,DLAT,RPL13,ILF2,RPL24,SNRPD3,TUFM,RPS20,HSPA1B,RBM14,HNRNPF,RSL1D1,BTF3,TRIM21
HPA	breast; adipocytes[High]	HPA:0050013	0.0123198	1.9094	304	11	FUS,HNRNPUL1,ALYREF,LMNA,CPSF6,PEX5,CGGBP1,SRSF6,HMGN1,HNRNPAB,ILF2
HPA	ovary; ovarian stroma cells[‚â•Low]	HPA:0340461	0.0127132	1.89575	3928	53	AIMP1,FUS,RPS6,GAPDH,HNRNPUL1,CALD1,ALYREF,SF3B2,LMNA,YBX1,IFT20,CPSF6,SAPS3,WTAP,FBLN2,LUZP1,PEX5,ADSL,TJP2,TBC1D4,AKAP8L,TRA2B,TUBB,CGGBP1,YWHAZ,SRSF6,TXN,HMGN1,MAP4,MYH11,RPS27A,JUP,TPM3,DBN1,TACC2,RBMX,HNRNPAB,HNRNPA3,PCMT1,HNRNPD,CBLL1,RPL13,ILF2,RPL24,SNRPD3,TUFM,RPS20,HSPA1B,RBM14,HNRNPF,RSL1D1,BTF3,TRIM21
HPA	testis; preleptotene spermatocytes[‚â•Low]	HPA:0570781	0.0135245	1.86888	1698	30	SNRPD1,RBM3,FUS,HNRNPUL1,ALYREF,SF3B2,CPSF6,WTAP,RIPK2,CCDC47,ADSL,PGAM5,AKAP8L,RPL11,TRA2B,CGGBP1,CCT4,SRSF6,RBMX,HNRNPA3,HNRNPD,CBLL1,DLAT,ILF2,SNRPD3,TUFM,HSPA1B,RBM14,HNRNPF,RSL1D1
HPA	fallopian tube	HPA:0210000	0.0135821	1.86703	7359	81	AIMP1,CHMP4B,ANKRD50,SNRPD1,RBM3,PDLIM5,FUS,RPL18A,RPS6,CHMP5,GAPDH,HNRNPUL1,CGN,ALYREF,SF3B2,LMNA,YBX1,IFT20,CPSF6,SAPS3,SLC39A10,TACC3,WTAP,INF2,SPAG9,LUZP1,CCDC47,PEX5,ADSL,TJP2,TBC1D4,TJP1,CGNL1,PGAM5,AKAP8L,GJA1,RPL11,TRA2B,TUBB,CGGBP1,YBX3,CCDC6,AIMP2,DDB1,YWHAZ,CCT4,SRSF6,TXN,PCM1,HMGN1,MAP4,RPS27A,JUP,TPM4,TPM3,DBN1,TACC2,MYL6,RBMX,HNRNPAB,HNRNPA3,PCMT1,HNRNPD,CFL1,CBLL1,DLAT,RPL13,ILF2,R…
HPA	testis; sertoli cells[High]	HPA:0570803	0.013642	1.86512	547	15	FUS,HNRNPUL1,ALYREF,LMNA,CPSF6,SAPS3,CCDC47,PEX5,TJP1,AKAP8L,GJA1,HMGN1,RPS27A,RBMX,ILF2
HPA	endometrium 1; glandular cells[‚â•Medium]	HPA:0160052	0.014517	1.83812	5066	63	AIMP1,CHMP4B,PDLIM5,FUS,RPS6,HNRNPUL1,CALD1,CGN,ALYREF,SF3B2,LMNA,YBX1,IFT20,CPSF6,SAPS3,SLC39A10,TACC3,WTAP,INF2,RIPK2,LUZP1,CCDC47,PEX5,ADSL,TJP2,TBC1D4,TJP1,CGNL1,PGAM5,AKAP8L,RPL11,TRA2B,PDE4C,CGGBP1,DDB1,YWHAZ,SRSF6,PCM1,HMGN1,MAP4,RPS27A,JUP,TPM4,TPM3,TACC2,MYL6,RBMX,HNRNPAB,HNRNPA3,HNRNPD,CBLL1,DLAT,RPL13,ILF2,RPL24,SNRPD3,TUFM,RPS20,RBM14,RPS9,RSL1D1,BTF3,TRIM21
HPA	skin 1; Langerhans[High]	HPA:0460643	0.0151542	1.81947	756	18	FUS,GAPDH,HNRNPUL1,ALYREF,SF3B2,CPSF6,PEX5,TRA2B,SRSF6,RPS27A,RBMX,HNRNPAB,HNRNPA3,ILF2,TUFM,HSPA1B,HNRNPF,RSL1D1
HPA	caudate; neuronal cells[‚â•Medium]	HPA:0080132	0.015424	1.8118	4061	54	AIMP1,CHMP4B,SNRPD1,FUS,RPL18A,RPS6,HNRNPUL1,ALYREF,SF3B2,YBX1,IFT20,CPSF6,INF2,RIPK2,LUZP1,CCDC47,PEX5,ADSL,TBC1D4,PGAM5,AKAP8L,GJA1,RPL11,TRA2B,PDE4C,SNRPN,CGGBP1,YBX3,AIMP2,DDB1,YWHAZ,CCT4,SRSF6,PCM1,RPS27A,TPM3,TACC2,RBMX,HNRNPAB,HNRNPD,CBLL1,DLAT,RPL13,ILF2,RPL24,SNRPD3,TUFM,RPS20,HSPA1B,RBM14,HNRNPF,RSL1D1,BTF3,TRIM21
HPA	tonsil; squamous epithelial cells[‚â•Low]	HPA:0600221	0.0161254	1.79249	6564	75	AIMP1,CHMP4B,ANKRD50,SNRPD1,RBM3,FUS,RPL18A,RPS6,GAPDH,HNRNPUL1,CALD1,ALYREF,SF3B2,LMNA,YBX1,IFT20,CPSF6,SAPS3,WTAP,INF2,SPAG9,RIPK2,FBLN2,LUZP1,CCDC47,PEX5,ADSL,TJP2,TBC1D4,PGAM5,AKAP8L,GJA1,RPL11,TRA2B,TUBB,CGGBP1,YBX3,CCDC6,AIMP2,DDB1,YWHAZ,SRSF6,TXN,PCM1,HMGN1,MAP4,RPS27A,DSP,JUP,TPM4,TPM3,TACC2,MYL6,RBMX,HNRNPAB,HNRNPA3,PCMT1,HNRNPD,CFL1,CBLL1,DLAT,RPL13,ILF2,RPL24,TUFM,RPL23A,RPS20,SBSN,HSP…
HPA	heart muscle; cardiomyocytes[High]	HPA:0241103	0.0163274	1.78708	1135	23	ANKRD50,PDLIM5,FUS,HNRNPUL1,ALYREF,SF3B2,LMNA,CPSF6,AKAP8L,GJA1,TRA2B,CGGBP1,DDB1,SRSF6,DSP,JUP,TPM1,TPM4,HNRNPAB,ILF2,HSPA1B,RBM14,SLC25A6
HPA	cerebellum; cells in molecular layer[‚â•Medium]	HPA:0090192	0.0187877	1.72613	2746	41	FUS,RPL18A,RPS6,HNRNPUL1,ALYREF,SF3B2,LMNA,IFT20,CPSF6,WTAP,LUZP1,CCDC47,ADSL,TBC1D4,RPL11,TRA2B,CGGBP1,CBS,AIMP2,DDB1,YWHAZ,SRSF6,HMGN1,RPS27A,TPM4,TPM3,RBMX,HNRNPAB,HNRNPA3,HNRNPD,CBLL1,DLAT,RPL13,ILF2,RPL24,TUFM,RPS20,RBM14,HNRNPF,RSL1D1,BTF3
HPA	colon; glandular cells[‚â•Medium]	HPA:0130052	0.0197292	1.70489	6333	73	AIMP1,CHMP4B,ANKRD50,SNRPD1,PDLIM5,FUS,RPL18A,RPS6,CHMP5,HNRNPUL1,CGN,ALYREF,SF3B2,LMNA,YBX1,IFT20,CPSF6,SAPS3,TACC3,WTAP,INF2,SPAG9,RIPK2,LUZP1,CCDC47,PEX5,ADSL,TJP2,TBC1D4,TJP1,PGAM5,AKAP8L,RPL11,TRA2B,TUBB,CGGBP1,CCDC6,AIMP2,DDB1,YWHAZ,CCT4,SRSF6,TXN,PCM1,HMGN1,MAP4,RPS27A,JUP,TPM4,DBN1,TACC2,MYL6,RBMX,HNRNPAB,HNRNPA3,HNRNPD,CFL1,CBLL1,DLAT,RPL13,ILF2,RPL24,SNRPD3,TUFM,RPL23A,RPS20,RBM14,RPS9,…
HPA	skin 1	HPA:0460000	0.0200585	1.6977	6996	78	AIMP1,CHMP4B,ANKRD50,SNRPD1,RBM3,PDLIM5,FUS,RPL18A,RPS6,GAPDH,HNRNPUL1,KPRP,ALYREF,SF3B2,LMNA,YBX1,IFT20,CPSF6,SAPS3,SLC39A10,WTAP,INF2,RIPK2,FBLN2,LUZP1,CCDC47,PEX5,ADSL,TJP2,TBC1D4,TJP1,PGAM5,AKAP8L,GJA1,RPL11,TRA2B,TUBB,CGGBP1,YBX3,CCDC6,AIMP2,DDB1,YWHAZ,SRSF6,TXN,PCM1,HMGN1,MAP4,RPS27A,DSP,JUP,TPM4,TPM3,TACC2,MYL6,RBMX,HNRNPAB,HNRNPA3,HNRNPD,CFL1,CBLL1,DLAT,RPL13,ILF2,RPL24,SNRPD3,TUFM,RPL23A…
HPA	skeletal muscle; myocytes[High]	HPA:0440343	0.0216232	1.66508	850	19	PDLIM5,FUS,ALYREF,LMNA,CPSF6,TRA2B,CGGBP1,RPS27A,TPM1,TPM4,TPM3,MYL1,MYL6,RBMX,HNRNPAB,HNRNPD,ILF2,RBM14,HNRNPF
HPA	breast; myoepithelial cells[‚â•Low]	HPA:0050091	0.0230087	1.63811	5607	67	AIMP1,CHMP4B,ANKRD50,SNRPD1,PDLIM5,FUS,RPS6,HNRNPUL1,CALD1,ALYREF,SF3B2,LMNA,YBX1,IFT20,CPSF6,SAPS3,WTAP,INF2,RIPK2,LUZP1,CCDC47,PEX5,ADSL,TJP2,TBC1D4,PGAM5,AKAP8L,GJA1,RPL11,TRA2B,TUBB,CGGBP1,YBX3,AIMP2,YWHAZ,SRSF6,TXN,HMGN1,MAP4,MYH11,RPS27A,JUP,TPM4,TPM3,DBN1,TACC2,MYL6,RBMX,HNRNPAB,HNRNPA3,PCMT1,CFL1,CBLL1,DLAT,RPL13,ILF2,RPL24,SNRPD3,TUFM,RPL23A,RPS20,RBM14,SLC25A6,HNRNPF,RSL1D1,BTF3,TRIM21
HPA	smooth muscle; smooth muscle cells[‚â•Medium]	HPA:0490692	0.02415	1.61708	3073	44	ANKRD50,PDLIM5,FUS,GAPDH,HNRNPUL1,CALD1,ALYREF,SF3B2,LMNA,CPSF6,SAPS3,WTAP,FBLN2,LUZP1,PEX5,ADSL,TBC1D4,AKAP8L,TRA2B,CGGBP1,YWHAZ,SRSF6,HMGN1,MAP4,MYH11,RPS27A,TPM1,TPM4,TPM3,TACC2,MYL6,RBMX,HNRNPAB,HNRNPA3,CBLL1,DLAT,ILF2,SNRPD3,TUFM,RPL23A,HSPA1B,RBM14,HNRNPF,BTF3
HPA	testis; spermatogonia cells[High]	HPA:0570813	0.0246383	1.60839	1328	25	FUS,HNRNPUL1,ALYREF,SF3B2,CPSF6,SAPS3,WTAP,ADSL,PGAM5,AKAP8L,TRA2B,TUBB,CGGBP1,CCT4,SRSF6,DBN1,RBMX,HNRNPA3,HNRNPD,CBLL1,DLAT,ILF2,TUFM,HNRNPF,RSL1D1
HPA	spleen; cells in white pulp[‚â•Medium]	HPA:0530722	0.0255435	1.59272	2684	40	AIMP1,CHMP4B,FUS,HNRNPUL1,ALYREF,SF3B2,YBX1,CPSF6,SAPS3,TACC3,INF2,PEX5,ADSL,PGAM5,AKAP8L,RPL11,TRA2B,TUBB,CGGBP1,DDB1,YWHAZ,SRSF6,HMGN1,MAP4,RPS27A,TPM4,MYL6,RBMX,HNRNPAB,HNRNPA3,HNRNPD,CFL1,CBLL1,DLAT,RPL13,ILF2,TUFM,RBM14,RSL1D1,BTF3
HPA	cerebral cortex; neuronal cells[‚â•Medium]	HPA:0100132	0.0274071	1.56214	4923	61	AIMP1,CHMP4B,SNRPD1,FUS,RPL18A,RPS6,HNRNPUL1,ALYREF,SF3B2,LMNA,IFT20,CPSF6,SAPS3,TACC3,WTAP,INF2,SPAG9,LUZP1,CCDC47,PEX5,ADSL,TBC1D4,PGAM5,AKAP8L,GJA1,RPL11,TRA2B,PDE4C,SNRPN,TUBB,CGGBP1,YBX3,CCDC6,AIMP2,DDB1,YWHAZ,CCT4,SRSF6,RPS27A,TPM4,TPM3,RBMX,HNRNPAB,HNRNPA3,PCMT1,HNRNPD,CBLL1,DLAT,RPL13,ILF2,RPL24,SNRPD3,TUFM,RPS20,HSPA1B,RBM14,SLC25A6,HNRNPF,RSL1D1,BTF3,TRIM21
HPA	bone marrow; hematopoietic cells[High]	HPA:0040083	0.028397	1.54673	1423	26	FUS,RPS6,HNRNPUL1,ALYREF,SF3B2,LMNA,YBX1,CPSF6,SAPS3,WTAP,ADSL,TRA2B,CGGBP1,YWHAZ,SRSF6,HMGN1,HNRNPAB,HNRNPA3,HNRNPD,ILF2,RPL24,RPS20,RBM14,RPS9,HNRNPF,TRIM21
HPA	adrenal gland; glandular cells[High]	HPA:0020053	0.0289041	1.53904	2222	35	ANKRD50,FUS,HNRNPUL1,ALYREF,SF3B2,LMNA,CPSF6,SAPS3,WTAP,PEX5,ADSL,TBC1D4,PGAM5,AKAP8L,GJA1,TRA2B,CGGBP1,DDB1,YWHAZ,SRSF6,HMGN1,RPS27A,TPM4,RBMX,HNRNPAB,HNRNPA3,HNRNPD,CBLL1,ILF2,RPL24,TUFM,RBM14,HNRNPF,RSL1D1,BTF3
HPA	colon; glandular cells[‚â•Low]	HPA:0130051	0.0306649	1.51336	7473	81	AIMP1,CHMP4B,ANKRD50,SNRPD1,RBM3,PDLIM5,FUS,RPL18A,RPS6,CHMP5,GAPDH,HNRNPUL1,CGN,ALYREF,SF3B2,LMNA,YBX1,IFT20,CPSF6,SAPS3,SLC39A10,TACC3,WTAP,INF2,SPAG9,RIPK2,LUZP1,CCDC47,PEX5,ADSL,TJP2,TBC1D4,TJP1,CGNL1,PGAM5,AKAP8L,GJA1,RPL11,TRA2B,TUBB,CGGBP1,YBX3,CCDC6,AIMP2,DDB1,YWHAZ,CCT4,SRSF6,TXN,PCM1,HMGN1,MAP4,RPS27A,JUP,TPM4,TPM3,DBN1,TACC2,MYL6,RBMX,HNRNPAB,HNRNPA3,HNRNPD,CFL1,CBLL1,DLAT,RPL13,ILF2,R…
HPA	fallopian tube; glandular cells[‚â•Low]	HPA:0210051	0.0311223	1.50693	6145	71	AIMP1,ANKRD50,SNRPD1,PDLIM5,FUS,RPL18A,RPS6,HNRNPUL1,CGN,ALYREF,SF3B2,LMNA,IFT20,CPSF6,SAPS3,SLC39A10,TACC3,WTAP,INF2,SPAG9,LUZP1,CCDC47,PEX5,ADSL,TJP2,TBC1D4,TJP1,CGNL1,PGAM5,AKAP8L,GJA1,RPL11,TRA2B,TUBB,CGGBP1,YBX3,CCDC6,AIMP2,DDB1,YWHAZ,CCT4,SRSF6,HMGN1,MAP4,RPS27A,JUP,TPM4,TPM3,DBN1,TACC2,MYL6,RBMX,HNRNPAB,HNRNPA3,PCMT1,HNRNPD,CBLL1,DLAT,RPL13,ILF2,RPL24,SNRPD3,RPS20,HSPA1B,RBM14,RPS9,SLC25A6…
HPA	skin 1; keratinocytes[‚â•Medium]	HPA:0460662	0.0319452	1.49559	3942	52	SNRPD1,RBM3,FUS,RPS6,GAPDH,HNRNPUL1,KPRP,ALYREF,SF3B2,LMNA,YBX1,IFT20,CPSF6,SAPS3,WTAP,CCDC47,PEX5,ADSL,TBC1D4,PGAM5,AKAP8L,GJA1,TRA2B,CGGBP1,AIMP2,DDB1,YWHAZ,SRSF6,TXN,HMGN1,RPS27A,DSP,JUP,TPM4,TACC2,RBMX,HNRNPAB,HNRNPA3,HNRNPD,CBLL1,RPL13,ILF2,RPL24,SNRPD3,TUFM,RPS20,SBSN,HSPA1B,RBM14,HNRNPF,RSL1D1,BTF3
HPA	soft tissue 2; peripheral nerve[High]	HPA:0510703	0.0327556	1.48471	283	10	FUS,RPS6,ALYREF,CPSF6,SRSF6,HMGN1,MAP4,RPS27A,HNRNPAB,ILF2
HPA	salivary gland; glandular cells[‚â•Low]	HPA:0420051	0.0336399	1.47315	6802	76	AIMP1,ANKRD50,SNRPD1,PDLIM5,FUS,RPL18A,RPS6,GAPDH,HNRNPUL1,CALD1,CGN,ALYREF,SF3B2,LMNA,YBX1,IFT20,CPSF6,SAPS3,TACC3,WTAP,INF2,RIPK2,LUZP1,CCDC47,PEX5,ADSL,TJP2,TBC1D4,TJP1,CGNL1,PGAM5,AKAP8L,RPL11,TRA2B,TUBB,CGGBP1,YBX3,CCDC6,DDB1,YWHAZ,SRSF6,TXN,PCM1,HMGN1,MAP4,RPS27A,DSP,JUP,TPM4,TPM3,DBN1,TACC2,MYL6,RBMX,HNRNPAB,HNRNPA3,PCMT1,HNRNPD,CFL1,CBLL1,DLAT,RPL13,ILF2,RPL24,SNRPD3,TUFM,RPL23A,RPS20,HSP…
HPA	salivary gland	HPA:0420000	0.0336399	1.47315	6802	76	AIMP1,ANKRD50,SNRPD1,PDLIM5,FUS,RPL18A,RPS6,GAPDH,HNRNPUL1,CALD1,CGN,ALYREF,SF3B2,LMNA,YBX1,IFT20,CPSF6,SAPS3,TACC3,WTAP,INF2,RIPK2,LUZP1,CCDC47,PEX5,ADSL,TJP2,TBC1D4,TJP1,CGNL1,PGAM5,AKAP8L,RPL11,TRA2B,TUBB,CGGBP1,YBX3,CCDC6,DDB1,YWHAZ,SRSF6,TXN,PCM1,HMGN1,MAP4,RPS27A,DSP,JUP,TPM4,TPM3,DBN1,TACC2,MYL6,RBMX,HNRNPAB,HNRNPA3,PCMT1,HNRNPD,CFL1,CBLL1,DLAT,RPL13,ILF2,RPL24,SNRPD3,TUFM,RPL23A,RPS20,HSP…
HPA	skin 1; melanocytes[‚â•Low]	HPA:0460671	0.0339296	1.46942	5423	65	AIMP1,SNRPD1,RBM3,PDLIM5,FUS,RPL18A,RPS6,GAPDH,HNRNPUL1,ALYREF,SF3B2,LMNA,YBX1,IFT20,CPSF6,SAPS3,SLC39A10,WTAP,RIPK2,FBLN2,LUZP1,PEX5,ADSL,TJP2,PGAM5,AKAP8L,GJA1,RPL11,TRA2B,TUBB,CGGBP1,YBX3,CCDC6,AIMP2,DDB1,YWHAZ,SRSF6,TXN,HMGN1,MAP4,RPS27A,DSP,JUP,TPM4,TPM3,TACC2,MYL6,RBMX,HNRNPAB,HNRNPA3,HNRNPD,CFL1,CBLL1,RPL13,ILF2,RPL24,SNRPD3,TUFM,RPL23A,RPS20,HSPA1B,SLC25A6,HNRNPF,RSL1D1,BTF3
HPA	fallopian tube; glandular cells[‚â•Medium]	HPA:0210052	0.0349792	1.45619	5074	62	AIMP1,SNRPD1,PDLIM5,FUS,RPL18A,RPS6,HNRNPUL1,CGN,ALYREF,SF3B2,LMNA,IFT20,CPSF6,SAPS3,SLC39A10,TACC3,WTAP,INF2,LUZP1,CCDC47,PEX5,ADSL,TJP2,TBC1D4,TJP1,PGAM5,AKAP8L,RPL11,TRA2B,TUBB,CGGBP1,CCDC6,AIMP2,DDB1,YWHAZ,CCT4,SRSF6,HMGN1,MAP4,RPS27A,JUP,TPM4,TPM3,MYL6,RBMX,HNRNPAB,HNRNPA3,HNRNPD,CBLL1,DLAT,RPL13,ILF2,RPL24,SNRPD3,RPS20,HSPA1B,RBM14,RPS9,HNRNPF,RSL1D1,BTF3,TRIM21
HPA	soft tissue 1; fibroblasts[High]	HPA:0500653	0.0360306	1.44333	530	14	FUS,ALYREF,LMNA,YBX1,IFT20,CPSF6,PEX5,CGGBP1,SRSF6,HMGN1,MAP4,TPM3,HNRNPAB,ILF2
HPA	hippocampus; glial cells[‚â•Medium]	HPA:0250122	0.0361606	1.44176	1970	32	AIMP1,FUS,HNRNPUL1,ALYREF,SF3B2,LMNA,CPSF6,SAPS3,WTAP,SPAG9,CCDC47,PEX5,ADSL,GJA1,TRA2B,CGGBP1,CBS,YWHAZ,HMGN1,MAP4,RBMX,HNRNPAB,HNRNPD,CBLL1,ILF2,RPL24,SNRPD3,TUFM,RBM14,HNRNPF,RSL1D1,BTF3
HPA	lung	HPA:0300000	0.0367462	1.43479	7220	79	AIMP1,CHMP4B,ANKRD50,SNRPD1,RBM3,PDLIM5,FUS,RPL18A,RPS6,GAPDH,HNRNPUL1,CALD1,CGN,ALYREF,SF3B2,LMNA,YBX1,IFT20,CPSF6,SAPS3,SLC39A10,WTAP,INF2,SPAG9,RIPK2,FBLN2,LUZP1,CCDC47,PEX5,ADSL,TJP2,TBC1D4,TJP1,CGNL1,PGAM5,AKAP8L,GJA1,RPL11,TRA2B,PDE4C,TUBB,CGGBP1,CCDC6,AIMP2,DDB1,YWHAZ,SRSF6,TXN,PCM1,HMGN1,MAP4,RPS27A,JUP,TPM4,TPM3,TACC2,MYL6,RBMX,HNRNPAB,HNRNPA3,PCMT1,HNRNPD,CFL1,CBLL1,DLAT,ILF2,RPL24,SNRP…
HPA	caudate; glial cells[‚â•Low]	HPA:0080121	0.0374308	1.42677	4513	57	AIMP1,SNRPD1,PDLIM5,FUS,RPS6,GAPDH,HNRNPUL1,CGN,ALYREF,SF3B2,LMNA,YBX1,IFT20,CPSF6,SAPS3,WTAP,SPAG9,LUZP1,CCDC47,PEX5,ADSL,TJP2,PGAM5,AKAP8L,GJA1,RPL11,TRA2B,SNRPN,TUBB,CGGBP1,CCDC6,CBS,YWHAZ,SRSF6,PCM1,HMGN1,MAP4,RPS27A,TPM3,TACC2,RBMX,HNRNPAB,HNRNPA3,HNRNPD,CBLL1,DLAT,ILF2,RPL24,SNRPD3,TUFM,RPS20,HSPA1B,RBM14,SLC25A6,HNRNPF,RSL1D1,BTF3
HPA	stomach 2; glandular cells[‚â•Low]	HPA:0550051	0.0402146	1.39562	7512	81	AIMP1,CHMP4B,ANKRD50,SNRPD1,RBM3,PDLIM5,FUS,RPL18A,RPS6,CHMP5,GAPDH,HNRNPUL1,CGN,ALYREF,SF3B2,LMNA,YBX1,IFT20,CPSF6,SAPS3,TACC3,WTAP,INF2,SPAG9,RIPK2,LUZP1,CCDC47,PEX5,ADSL,TJP2,TBC1D4,TJP1,CGNL1,PGAM5,AKAP8L,GJA1,RPL11,TRA2B,PDE4C,TUBB,CGGBP1,YBX3,CCDC6,AIMP2,DDB1,YWHAZ,SRSF6,TXN,PCM1,HMGN1,MAP4,RPS27A,JUP,TPM4,TPM3,DBN1,TACC2,MYL6,RBMX,HNRNPAB,HNRNPA3,PCMT1,HNRNPD,CFL1,CBLL1,DLAT,RPL13,ILF2,RPL…
HPA	stomach 2	HPA:0550000	0.0402146	1.39562	7512	81	AIMP1,CHMP4B,ANKRD50,SNRPD1,RBM3,PDLIM5,FUS,RPL18A,RPS6,CHMP5,GAPDH,HNRNPUL1,CGN,ALYREF,SF3B2,LMNA,YBX1,IFT20,CPSF6,SAPS3,TACC3,WTAP,INF2,SPAG9,RIPK2,LUZP1,CCDC47,PEX5,ADSL,TJP2,TBC1D4,TJP1,CGNL1,PGAM5,AKAP8L,GJA1,RPL11,TRA2B,PDE4C,TUBB,CGGBP1,YBX3,CCDC6,AIMP2,DDB1,YWHAZ,SRSF6,TXN,PCM1,HMGN1,MAP4,RPS27A,JUP,TPM4,TPM3,DBN1,TACC2,MYL6,RBMX,HNRNPAB,HNRNPA3,PCMT1,HNRNPD,CFL1,CBLL1,DLAT,RPL13,ILF2,RPL…
HPA	cerebral cortex; endothelial cells[‚â•Medium]	HPA:0100202	0.0411819	1.38529	2450	37	ANKRD50,SNRPD1,FUS,RPS6,HNRNPUL1,CALD1,ALYREF,SF3B2,LMNA,IFT20,CPSF6,SAPS3,SLC39A10,WTAP,INF2,LUZP1,ADSL,TBC1D4,TJP1,CGNL1,PGAM5,TRA2B,CGGBP1,AIMP2,DDB1,HMGN1,MAP4,RPS27A,TPM3,HNRNPAB,CBLL1,ILF2,SNRPD3,TUFM,RBM14,RSL1D1,BTF3
HPA	placenta; trophoblastic cells[‚â•Low]	HPA:0380521	0.0437968	1.35856	6450	73	AIMP1,CHMP4B,ANKRD50,SNRPD1,RBM3,PDLIM5,FUS,RPL18A,RPS6,CHMP5,GAPDH,HNRNPUL1,CALD1,ALYREF,SF3B2,LMNA,YBX1,IFT20,CPSF6,SAPS3,SLC39A10,TACC3,WTAP,INF2,SPAG9,RIPK2,LUZP1,CCDC47,PEX5,ADSL,TJP2,TBC1D4,AKAP8L,RPL11,TRA2B,CGGBP1,CCDC6,AIMP2,DDB1,YWHAZ,SRSF6,TXN,HMGN1,MAP4,RPS27A,DSP,JUP,TPM4,TPM3,TACC2,MYL6,RBMX,HNRNPAB,HNRNPA3,PCMT1,HNRNPD,CBLL1,DLAT,RPL13,ILF2,RPL24,SNRPD3,TUFM,RPL23A,RPS20,HSPA1B,RBM…
HPA	caudate; glial cells[‚â•Medium]	HPA:0080122	0.0459872	1.33736	2273	35	AIMP1,FUS,RPS6,HNRNPUL1,ALYREF,SF3B2,LMNA,YBX1,IFT20,CPSF6,WTAP,PEX5,ADSL,PGAM5,GJA1,TRA2B,CGGBP1,YWHAZ,SRSF6,PCM1,HMGN1,MAP4,RPS27A,TPM3,TACC2,HNRNPAB,HNRNPA3,HNRNPD,CBLL1,ILF2,RPL24,SNRPD3,TUFM,RBM14,HNRNPF
HPA	liver	HPA:0290000	0.0490579	1.30929	6213	71	AIMP1,CHMP4B,ANKRD50,SNRPD1,FUS,RPL18A,RPS6,GAPDH,HNRNPUL1,CALD1,ALYREF,SF3B2,LMNA,YBX1,IFT20,CPSF6,SAPS3,SLC39A10,WTAP,INF2,RIPK2,CCDC47,PEX5,ADSL,TJP2,TBC1D4,TJP1,PGAM5,AKAP8L,RPL11,TRA2B,PDE4C,TUBB,CGGBP1,YBX3,CBS,AIMP2,DDB1,YWHAZ,SRSF6,TXN,PCM1,HMGN1,MAP4,RPS27A,JUP,TPM4,TPM3,TACC2,RBMX,HNRNPAB,HNRNPA3,PCMT1,HNRNPD,CBLL1,DLAT,RPL13,ILF2,RPL24,SNRPD3,TUFM,RPL23A,RPS20,HSPA1B,RBM14,RPS9,SLC25A6…
HPA	seminal vesicle; glandular cells[‚â•Low]	HPA:0430051	0.0499256	1.30168	6729	75	AIMP1,CHMP4B,SNRPD1,PDLIM5,FUS,RPL18A,RPS6,CHMP5,GAPDH,HNRNPUL1,CGN,ALYREF,SF3B2,LMNA,YBX1,IFT20,CPSF6,SAPS3,SLC39A10,WTAP,INF2,RIPK2,LUZP1,CCDC47,PEX5,ADSL,TJP2,TBC1D4,TJP1,CGNL1,PGAM5,AKAP8L,GJA1,RPL11,TRA2B,TUBB,CGGBP1,YBX3,AIMP2,DDB1,YWHAZ,CCT4,SRSF6,TXN,PCM1,HMGN1,MAP4,RPS27A,JUP,TPM4,TPM3,TACC2,MYL6,RBMX,HNRNPAB,HNRNPA3,PCMT1,HNRNPD,CFL1,CBLL1,RPL13,ILF2,RPL24,SNRPD3,TUFM,RPL23A,RPS20,HSPA1…
HPA	seminal vesicle	HPA:0430000	0.0499256	1.30168	6729	75	AIMP1,CHMP4B,SNRPD1,PDLIM5,FUS,RPL18A,RPS6,CHMP5,GAPDH,HNRNPUL1,CGN,ALYREF,SF3B2,LMNA,YBX1,IFT20,CPSF6,SAPS3,SLC39A10,WTAP,INF2,RIPK2,LUZP1,CCDC47,PEX5,ADSL,TJP2,TBC1D4,TJP1,CGNL1,PGAM5,AKAP8L,GJA1,RPL11,TRA2B,TUBB,CGGBP1,YBX3,AIMP2,DDB1,YWHAZ,CCT4,SRSF6,TXN,PCM1,HMGN1,MAP4,RPS27A,JUP,TPM4,TPM3,TACC2,MYL6,RBMX,HNRNPAB,HNRNPA3,PCMT1,HNRNPD,CFL1,CBLL1,RPL13,ILF2,RPL24,SNRPD3,TUFM,RPL23A,RPS20,HSPA1…
CORUM	Ribosome, cytoplasmic	CORUM:306	1.4186e-06	5.84814	80	12	RPS8,RPL34,RPL18A,RPS6,RPL7A,RPL11,RPS27A,RPL13,RPL24,RPL23A,RPS20,RPS9
CORUM	Nop56p-associated pre-rRNA complex	CORUM:3055	3.12103e-06	5.5057	104	13	RPS8,RPL18A,RPS6,RPL7A,YBX1,RPL11,RPL13,ILF2,RPL24,TUFM,RPL23A,RPS9,RSL1D1
CORUM	TRBP containing complex (DICER, RPL7A, EIF6, MOV10 and subunits of the 60S ribosomal particle)	CORUM:5380	0.00056099	3.25104	25	6	RPL34,RPL18A,RPL7A,MOV10,RPL11,RPL13
CORUM	CDC5L complex	CORUM:1183	0.00175331	2.75614	30	6	SNRPD1,SF3B2,RBMX,HSPA8,ILF2,SNRPD3
CORUM	60S ribosomal subunit, cytoplasmic	CORUM:308	0.00241009	2.61797	47	7	RPL34,RPL18A,RPL7A,RPL11,RPL13,RPL24,RPL23A
CORUM	Spliceosome	CORUM:351	0.0258672	1.58725	141	10	SNRPD1,SF3B2,CPSF6,WTAP,MOV10,NUDT21,TRA2B,SRSF6,SNRPD3,MFAP1
CORUM	40S ribosomal subunit, cytoplasmic	CORUM:338	0.0295892	1.52887	31	5	RPS8,RPS6,RPS27A,RPS20,RPS9
CORUM	40S ribosomal subunit, cytoplasmic	CORUM:305	0.0402033	1.39574	33	5	RPS8,RPS6,RPS27A,RPS20,RPS9
HP	Congenital alopecia totalis	HP:0005597	0.00127232	2.8954	4	3	GJA1,DSP,JUP
HP	4-5 finger syndactyly	HP:0010705	0.00127232	2.8954	4	3	GJA1,DSP,JUP
HP	Alopecia totalis	HP:0007418	0.00135915	2.86673	13	4	LMNA,GJA1,DSP,JUP

## Sheet: VEGF-regulated Enrichment
source	term_name	term_id	adjusted_p_value	negative_log10_of_adjusted_p_value	term_size	intersection_size	intersections
GO:MF	RNA binding	GO:0003723	1.94853e-09	8.71029	1951	25	AIMP1,RPS8,SNRPD1,RBM3,RPL34,FUS,RPL18A,RPS6,RPL7A,HNRNPUL1,ALYREF,SF3B2,YBX1,CPSF6,YWHAZ,CCT4,SRSF6,TXN,NUFIP2,MAP4,RPS27A,DSP,PPIA,RBMX,BTF3
GO:MF	structural molecule activity	GO:0005198	1.47999e-07	6.82974	701	15	RPS8,RPL34,RPL18A,RPS6,RPL7A,LMNA,MAP4,MYH11,RPS27A,DSP,JUP,TPM1,TPM4,MYL1,MYL6
GO:MF	cell adhesion molecule binding	GO:0050839	8.53425e-06	5.06883	544	12	CHMP4B,PDLIM5,RPL34,CHMP5,RPL7A,CALD1,CGN,YWHAZ,DSP,JUP,DBN1,PPIA
GO:MF	cadherin binding	GO:0045296	8.68777e-06	5.06109	333	10	CHMP4B,PDLIM5,RPL34,CHMP5,RPL7A,CALD1,CGN,YWHAZ,JUP,DBN1
GO:MF	structural constituent of muscle	GO:0008307	5.06553e-05	4.29538	43	5	MYH11,TPM1,TPM4,MYL1,MYL6
GO:MF	nucleic acid binding	GO:0003676	0.00121205	2.91648	4252	27	AIMP1,RPS8,SNRPD1,RBM3,RPL34,PDX1,FUS,RPL18A,RPS6,RPL7A,HNRNPUL1,ALYREF,SF3B2,YBX1,CPSF6,YWHAZ,CCT4,SRSF6,TXN,HMGN1,NUFIP2,MAP4,RPS27A,DSP,PPIA,RBMX,BTF3
GO:MF	structural constituent of ribosome	GO:0003735	0.00316617	2.49947	171	6	RPS8,RPL34,RPL18A,RPS6,RPL7A,RPS27A
GO:MF	actin binding	GO:0003779	0.0123536	1.9082	449	8	PDLIM5,CALD1,CGN,MYH11,TPM1,TPM4,TPM3,DBN1
GO:MF	cytoskeletal protein binding	GO:0008092	0.0299788	1.52319	1001	11	PDLIM5,FUS,GAPDH,CALD1,CGN,MAP4,MYH11,TPM1,TPM4,TPM3,DBN1
GO:MF	cell adhesive protein binding involved in bundle of His cell-Purkinje myocyte communication	GO:0086083	0.0333518	1.47688	5	2	DSP,JUP
GO:BP	mRNA metabolic process	GO:0016071	1.40428e-06	5.85255	880	16	RPS8,SNRPD1,RBM3,RPL34,FUS,RPL18A,RPS6,RPL7A,HNRNPUL1,SF3B2,YBX1,CPSF6,YWHAZ,SRSF6,RPS27A,RBMX
GO:BP	nitrogen compound transport	GO:0071705	4.98443e-06	5.30238	2216	23	AIMP1,CHMP4B,RPS8,ANKRD50,DENND1A,RPL34,PDX1,RPL18A,RPS6,CHMP5,RPL7A,LMNA,YBX1,IFT20,CPSF6,YWHAZ,SRSF6,TXN,PCM1,RPS27A,JUP,PPIA,BTF3
GO:BP	intracellular transport	GO:0046907	1.40181e-05	4.85331	1723	20	CHMP4B,RPS8,ANKRD50,DENND1A,SNRPD1,RPL34,RPL18A,RPS6,CHMP5,RPL7A,LMNA,IFT20,CPSF6,SAPS3,YWHAZ,SRSF6,TXN,PCM1,RPS27A,JUP
GO:BP	protein targeting to ER	GO:0045047	4.2178e-05	4.37491	111	7	CHMP4B,RPS8,RPL34,RPL18A,RPS6,RPL7A,RPS27A
GO:BP	protein localization to organelle	GO:0033365	5.18254e-05	4.28546	974	15	CHMP4B,RPS8,RPL34,RPL18A,RPS6,RPL7A,LMNA,YBX1,IFT20,YWHAZ,CCT4,TXN,PCM1,RPS27A,JUP
GO:BP	establishment of protein localization to endoplasmic reticulum	GO:0072599	5.39696e-05	4.26785	115	7	CHMP4B,RPS8,RPL34,RPL18A,RPS6,RPL7A,RPS27A
GO:BP	establishment of protein localization	GO:0045184	5.485e-05	4.26082	1866	20	CHMP4B,RPS8,ANKRD50,DENND1A,RPL34,PDX1,RPL18A,RPS6,CHMP5,RPL7A,LMNA,IFT20,YWHAZ,CCT4,TXN,PCM1,RPS27A,JUP,PPIA,BTF3
GO:BP	cellular localization	GO:0051641	6.88688e-05	4.16198	3519	27	CHMP4B,RPS8,ANKRD50,DENND1A,SNRPD1,RPL34,PDX1,RPL18A,RPS6,CHMP5,RPL7A,LMNA,YBX1,IFT20,CPSF6,SAPS3,YWHAZ,CCT4,SRSF6,TXN,PCM1,MAP4,RPS27A,DSP,JUP,DBN1,PPIA
GO:BP	establishment of localization in cell	GO:0051649	7.30705e-05	4.13626	2778	24	CHMP4B,RPS8,ANKRD50,DENND1A,SNRPD1,RPL34,PDX1,RPL18A,RPS6,CHMP5,RPL7A,LMNA,IFT20,CPSF6,SAPS3,YWHAZ,SRSF6,TXN,PCM1,MAP4,RPS27A,DSP,JUP,PPIA
GO:BP	actin-mediated cell contraction	GO:0070252	8.13435e-05	4.08968	122	7	DSP,JUP,TPM1,TPM4,TPM3,MYL1,MYL6
GO:BP	muscle system process	GO:0003012	8.83155e-05	4.05396	471	11	PDLIM5,CALD1,LMNA,MYH11,DSP,JUP,TPM1,TPM4,TPM3,MYL1,MYL6
GO:BP	protein transport	GO:0015031	0.000121388	3.91582	1754	19	CHMP4B,RPS8,ANKRD50,DENND1A,RPL34,PDX1,RPL18A,RPS6,CHMP5,RPL7A,LMNA,IFT20,YWHAZ,TXN,PCM1,RPS27A,JUP,PPIA,BTF3
GO:BP	actin-myosin filament sliding	GO:0033275	0.000143045	3.84453	39	5	TPM1,TPM4,TPM3,MYL1,MYL6
GO:BP	muscle filament sliding	GO:0030049	0.000143045	3.84453	39	5	TPM1,TPM4,TPM3,MYL1,MYL6
GO:BP	cellular component biogenesis	GO:0044085	0.000144937	3.83882	3377	26	CHMP4B,RPS8,SNRPD1,PDLIM5,RPL34,FUS,RPL18A,RPS6,CHMP5,RPL7A,CALD1,LMNA,IFT20,CPSF6,SAPS3,YWHAZ,SRSF6,PCM1,DNAH8,MAP4,MYH11,RPS27A,JUP,TPM1,DBN1,RBMX
GO:BP	organic substance transport	GO:0071702	0.000165504	3.78119	2657	23	AIMP1,CHMP4B,RPS8,ANKRD50,DENND1A,RPL34,PDX1,RPL18A,RPS6,CHMP5,RPL7A,LMNA,YBX1,IFT20,CPSF6,YWHAZ,SRSF6,TXN,PCM1,RPS27A,JUP,PPIA,BTF3
GO:BP	macromolecule localization	GO:0033036	0.000171242	3.76639	3148	25	CHMP4B,RPS8,ANKRD50,DENND1A,RPL34,PDX1,RPL18A,RPS6,CHMP5,RPL7A,LMNA,YBX1,IFT20,CPSF6,YWHAZ,CCT4,SRSF6,TXN,PCM1,RPS27A,DSP,JUP,DBN1,PPIA,BTF3
GO:BP	protein localization	GO:0008104	0.000181471	3.74119	2670	23	CHMP4B,RPS8,ANKRD50,DENND1A,RPL34,PDX1,RPL18A,RPS6,CHMP5,RPL7A,LMNA,YBX1,IFT20,YWHAZ,CCT4,TXN,PCM1,RPS27A,DSP,JUP,DBN1,PPIA,BTF3
GO:BP	protein localization to endoplasmic reticulum	GO:0070972	0.0002551	3.59329	144	7	CHMP4B,RPS8,RPL34,RPL18A,RPS6,RPL7A,RPS27A
GO:BP	establishment of protein localization to organelle	GO:0072594	0.00025538	3.59281	523	11	CHMP4B,RPS8,RPL34,RPL18A,RPS6,RPL7A,LMNA,YWHAZ,CCT4,RPS27A,JUP
GO:BP	actin filament-based movement	GO:0030048	0.000353062	3.45215	151	7	DSP,JUP,TPM1,TPM4,TPM3,MYL1,MYL6
GO:BP	SRP-dependent cotranslational protein targeting to membrane	GO:0006614	0.00049885	3.30203	96	6	RPS8,RPL34,RPL18A,RPS6,RPL7A,RPS27A
GO:BP	RNA processing	GO:0006396	0.000625229	3.20396	1010	14	RPS8,SNRPD1,RBM3,RPL34,FUS,RPL18A,RPS6,RPL7A,HNRNPUL1,SF3B2,YBX1,CPSF6,SRSF6,RBMX
GO:BP	cotranslational protein targeting to membrane	GO:0006613	0.000715782	3.14522	102	6	RPS8,RPL34,RPL18A,RPS6,RPL7A,RPS27A
GO:BP	muscle contraction	GO:0006936	0.00108232	2.96564	363	9	CALD1,MYH11,DSP,JUP,TPM1,TPM4,TPM3,MYL1,MYL6
GO:BP	localization within membrane	GO:0051668	0.00167449	2.77612	775	12	CHMP4B,RPS8,ANKRD50,DENND1A,RPL34,RPL18A,RPS6,RPL7A,IFT20,YWHAZ,RPS27A,JUP
GO:BP	mRNA catabolic process	GO:0006402	0.00188657	2.72433	388	9	RPS8,RPL34,FUS,RPL18A,RPS6,RPL7A,YBX1,YWHAZ,RPS27A
GO:BP	cytoskeleton organization	GO:0007010	0.00192517	2.71553	1473	16	CHMP4B,PDLIM5,CHMP5,GAPDH,CALD1,LMNA,PCM1,DNAH8,MAP4,MYH11,DSP,TPM1,TPM4,TPM3,DBN1,TACC2
GO:BP	nuclear-transcribed mRNA catabolic process, nonsense-mediated decay	GO:0000184	0.00216424	2.6647	123	6	RPS8,RPL34,RPL18A,RPS6,RPL7A,RPS27A
GO:BP	protein targeting to membrane	GO:0006612	0.00433719	2.36279	219	7	CHMP4B,RPS8,RPL34,RPL18A,RPS6,RPL7A,RPS27A
GO:BP	RNA catabolic process	GO:0006401	0.00449761	2.34702	431	9	RPS8,RPL34,FUS,RPL18A,RPS6,RPL7A,YBX1,YWHAZ,RPS27A
GO:BP	cytoplasmic translation	GO:0002181	0.00662956	2.17852	149	6	RPS8,RPL34,RPL18A,RPS6,RPL7A,RPS27A
GO:BP	virion assembly	GO:0019068	0.00911776	2.04011	40	4	CHMP4B,CHMP5,RPS27A,PPIA
GO:BP	RNA splicing, via transesterification reactions with bulged adenosine as nucleophile	GO:0000377	0.0112932	1.94718	360	8	SNRPD1,RBM3,FUS,HNRNPUL1,SF3B2,YBX1,SRSF6,RBMX
GO:BP	mRNA splicing, via spliceosome	GO:0000398	0.0112932	1.94718	360	8	SNRPD1,RBM3,FUS,HNRNPUL1,SF3B2,YBX1,SRSF6,RBMX
GO:BP	RNA splicing, via transesterification reactions	GO:0000375	0.012003	1.92071	363	8	SNRPD1,RBM3,FUS,HNRNPUL1,SF3B2,YBX1,SRSF6,RBMX
GO:BP	cellular component organization or biogenesis	GO:0071840	0.0180964	1.74241	6880	34	CHMP4B,RPS8,SNRPD1,PDLIM5,RPL34,FUS,RPL18A,RPS6,CHMP5,GAPDH,RPL7A,CALD1,LMNA,IFT20,CPSF6,SAPS3,YWHAZ,CCT4,SRSF6,PCM1,DNAH8,HMGN1,MAP4,MYH11,RPS27A,DSP,JUP,TPM1,TPM4,TPM3,DBN1,TACC2,PPIA,RBMX
GO:BP	regulation of mRNA metabolic process	GO:1903311	0.0181145	1.74197	384	8	RBM3,FUS,YBX1,CPSF6,YWHAZ,SRSF6,RPS27A,RBMX
GO:BP	establishment of protein localization to membrane	GO:0090150	0.0184613	1.73374	385	8	CHMP4B,RPS8,RPL34,RPL18A,RPS6,RPL7A,YWHAZ,RPS27A
GO:BP	actin filament-based process	GO:0030029	0.0185212	1.73233	810	11	PDLIM5,CALD1,MYH11,DSP,JUP,TPM1,TPM4,TPM3,DBN1,MYL1,MYL6
GO:BP	viral transcription	GO:0019083	0.0203248	1.69197	181	6	RPS8,RPL34,RPL18A,RPS6,RPL7A,RPS27A
GO:BP	intracellular protein transport	GO:0006886	0.0222756	1.65217	995	12	CHMP4B,RPS8,RPL34,RPL18A,RPS6,RPL7A,LMNA,YWHAZ,TXN,PCM1,RPS27A,JUP
GO:BP	protein targeting	GO:0006605	0.0243795	1.61297	400	8	CHMP4B,RPS8,RPL34,RPL18A,RPS6,RPL7A,YWHAZ,RPS27A
GO:BP	mRNA processing	GO:0006397	0.0247988	1.60557	532	9	SNRPD1,RBM3,FUS,HNRNPUL1,SF3B2,YBX1,CPSF6,SRSF6,RBMX
GO:BP	protein localization to membrane	GO:0072657	0.0322398	1.49161	698	10	CHMP4B,RPS8,RPL34,RPL18A,RPS6,RPL7A,IFT20,YWHAZ,RPS27A,JUP
GO:BP	cellular protein localization	GO:0034613	0.0353309	1.45184	1842	16	CHMP4B,RPS8,RPL34,RPL18A,RPS6,RPL7A,LMNA,YBX1,IFT20,YWHAZ,CCT4,TXN,PCM1,RPS27A,JUP,DBN1
GO:BP	cellular macromolecule localization	GO:0070727	0.0388707	1.41038	1856	16	CHMP4B,RPS8,RPL34,RPL18A,RPS6,RPL7A,LMNA,YBX1,IFT20,YWHAZ,CCT4,TXN,PCM1,RPS27A,JUP,DBN1
GO:BP	translational initiation	GO:0006413	0.0390335	1.40856	203	6	RPS8,RPL34,RPL18A,RPS6,RPL7A,RPS27A
GO:BP	nucleobase-containing compound catabolic process	GO:0034655	0.0447487	1.34922	573	9	RPS8,RPL34,FUS,RPL18A,RPS6,RPL7A,YBX1,YWHAZ,RPS27A
GO:BP	cellular component assembly	GO:0022607	0.0486331	1.31307	3104	21	CHMP4B,SNRPD1,PDLIM5,FUS,CHMP5,CALD1,LMNA,IFT20,CPSF6,SAPS3,YWHAZ,SRSF6,PCM1,DNAH8,MAP4,MYH11,RPS27A,JUP,TPM1,DBN1,RBMX
GO:CC	ribonucleoprotein complex	GO:1990904	8.80501e-09	8.05527	694	16	RPS8,SNRPD1,RBM3,RPL34,FUS,RPL18A,RPS6,GAPDH,RPL7A,SF3B2,YBX1,CPSF6,NUFIP2,RPS27A,RBMX,BTF3
GO:CC	cytosol	GO:0005829	5.56201e-07	6.25477	5361	36	AIMP1,CHMP4B,RPS8,DENND1A,SNRPD1,PDLIM5,RPL34,PDX1,RPL18A,RPS6,CHMP5,GAPDH,RPL7A,CALD1,LMNA,YBX1,SAPS3,YWHAZ,CCT4,TXN,PCM1,NUFIP2,TPI1,MAP4,MYH11,RPS27A,JUP,TPM1,TPM4,TPM3,DBN1,MYL1,TACC2,PPIA,MYL6,BTF3
GO:CC	intracellular non-membrane-bounded organelle	GO:0043232	3.45177e-06	5.46196	5094	34	RPS8,RBM3,PDLIM5,RPL34,PDX1,RPL18A,RPS6,GAPDH,RPL7A,CALD1,CGN,LMNA,YBX1,IFT20,CPSF6,CCT4,PCM1,DNAH8,HMGN1,NUFIP2,MAP4,MYH11,RPS27A,DSP,JUP,TPM1,TPM4,TPM3,DBN1,MYL1,TACC2,MYL6,RBMX,BTF3
GO:CC	non-membrane-bounded organelle	GO:0043228	3.60369e-06	5.44325	5102	34	RPS8,RBM3,PDLIM5,RPL34,PDX1,RPL18A,RPS6,GAPDH,RPL7A,CALD1,CGN,LMNA,YBX1,IFT20,CPSF6,CCT4,PCM1,DNAH8,HMGN1,NUFIP2,MAP4,MYH11,RPS27A,DSP,JUP,TPM1,TPM4,TPM3,DBN1,MYL1,TACC2,MYL6,RBMX,BTF3
GO:CC	ribosome	GO:0005840	6.03007e-06	5.21968	247	9	RPS8,RBM3,RPL34,RPL18A,RPS6,RPL7A,NUFIP2,RPS27A,BTF3
GO:CC	polysome	GO:0005844	1.16075e-05	4.93526	72	6	FUS,RPL18A,RPS6,RPL7A,NUFIP2,BTF3
GO:CC	supramolecular complex	GO:0099080	1.41526e-05	4.84916	1325	17	PDLIM5,RPS6,CALD1,LMNA,YBX1,CCT4,DNAH8,NUFIP2,MAP4,MYH11,DSP,JUP,TPM1,TPM4,TPM3,DBN1,MYL1
GO:CC	muscle thin filament tropomyosin	GO:0005862	1.97804e-05	4.70376	4	3	TPM1,TPM4,TPM3
GO:CC	actin cytoskeleton	GO:0015629	3.61601e-05	4.44177	517	11	PDLIM5,CALD1,CGN,MYH11,JUP,TPM1,TPM4,TPM3,DBN1,MYL1,MYL6
GO:CC	contractile fiber	GO:0043292	8.13341e-05	4.08973	242	8	PDLIM5,CALD1,MYH11,JUP,TPM1,TPM4,TPM3,MYL1
GO:CC	supramolecular fiber	GO:0099512	9.49434e-05	4.02254	997	14	PDLIM5,CALD1,LMNA,CCT4,DNAH8,MAP4,MYH11,DSP,JUP,TPM1,TPM4,TPM3,DBN1,MYL1
GO:CC	supramolecular polymer	GO:0099081	0.000104574	3.98057	1005	14	PDLIM5,CALD1,LMNA,CCT4,DNAH8,MAP4,MYH11,DSP,JUP,TPM1,TPM4,TPM3,DBN1,MYL1
GO:CC	cytosolic ribosome	GO:0022626	0.000117894	3.92851	106	6	RPS8,RPL34,RPL18A,RPS6,RPL7A,RPS27A
GO:CC	protein-containing complex	GO:0032991	0.000142271	3.84688	5541	33	AIMP1,CHMP4B,RPS8,SNRPD1,RBM3,PDLIM5,RPL34,FUS,RPL18A,RPS6,GAPDH,RPL7A,CGN,SF3B2,YBX1,IFT20,CPSF6,CCT4,PCM1,DNAH8,NUFIP2,MAP4,MYH11,RPS27A,JUP,TPM1,TPM4,TPM3,MYL1,PPIA,MYL6,RBMX,BTF3
GO:CC	extracellular exosome	GO:0070062	0.000164939	3.78268	2178	20	CHMP4B,RPS8,RPL34,CHMP5,GAPDH,KPRP,YBX1,YWHAZ,CCT4,TXN,TPI1,MYH11,RPS27A,DSP,JUP,TPM4,TPM3,PPIA,MYL6,RBMX
GO:CC	ribosomal subunit	GO:0044391	0.000235884	3.6273	191	7	RPS8,RBM3,RPL34,RPL18A,RPS6,RPL7A,RPS27A
GO:CC	extracellular vesicle	GO:1903561	0.000304226	3.5168	2263	20	CHMP4B,RPS8,RPL34,CHMP5,GAPDH,KPRP,YBX1,YWHAZ,CCT4,TXN,TPI1,MYH11,RPS27A,DSP,JUP,TPM4,TPM3,PPIA,MYL6,RBMX
GO:CC	extracellular membrane-bounded organelle	GO:0065010	0.000308529	3.5107	2265	20	CHMP4B,RPS8,RPL34,CHMP5,GAPDH,KPRP,YBX1,YWHAZ,CCT4,TXN,TPI1,MYH11,RPS27A,DSP,JUP,TPM4,TPM3,PPIA,MYL6,RBMX
GO:CC	extracellular organelle	GO:0043230	0.000308529	3.5107	2265	20	CHMP4B,RPS8,RPL34,CHMP5,GAPDH,KPRP,YBX1,YWHAZ,CCT4,TXN,TPI1,MYH11,RPS27A,DSP,JUP,TPM4,TPM3,PPIA,MYL6,RBMX
GO:CC	cytoskeleton	GO:0005856	0.000513075	3.28982	2339	20	PDLIM5,GAPDH,CALD1,CGN,LMNA,IFT20,CCT4,PCM1,DNAH8,MAP4,MYH11,DSP,JUP,TPM1,TPM4,TPM3,DBN1,MYL1,TACC2,MYL6
GO:CC	polysomal ribosome	GO:0042788	0.000569493	3.24451	34	4	RPL18A,RPL7A,NUFIP2,BTF3
GO:CC	actomyosin	GO:0042641	0.000650985	3.18643	79	5	PDLIM5,TPM1,TPM4,TPM3,DBN1
GO:CC	myofibril	GO:0030016	0.00091023	3.04085	234	7	PDLIM5,CALD1,JUP,TPM1,TPM4,TPM3,MYL1
GO:CC	polymeric cytoskeletal fiber	GO:0099513	0.00168668	2.77297	766	11	PDLIM5,LMNA,CCT4,DNAH8,MAP4,DSP,JUP,TPM1,TPM4,TPM3,DBN1
GO:CC	intracellular organelle	GO:0043229	0.00182706	2.73825	13117	50	AIMP1,CHMP4B,RPS8,ANKRD50,DENND1A,SNRPD1,RBM3,PDLIM5,RPL34,PDX1,FUS,RPL18A,RPS6,CHMP5,GAPDH,RPL7A,HNRNPUL1,CALD1,CGN,ALYREF,SF3B2,LMNA,YBX1,IFT20,CPSF6,SAPS3,YWHAZ,CCT4,SRSF6,TXN,PCM1,DNAH8,HMGN1,NUFIP2,TPI1,MAP4,MYH11,RPS27A,DSP,JUP,TPM1,TPM4,TPM3,DBN1,MYL1,TACC2,PPIA,MYL6,RBMX,BTF3
GO:CC	myosin complex	GO:0016459	0.00462559	2.33483	57	4	CGN,MYH11,MYL1,MYL6
GO:CC	actin filament	GO:0005884	0.00465474	2.3321	118	5	PDLIM5,TPM1,TPM4,TPM3,DBN1
GO:CC	organelle	GO:0043226	0.0051421	2.28886	14027	51	AIMP1,CHMP4B,RPS8,ANKRD50,DENND1A,SNRPD1,RBM3,PDLIM5,RPL34,PDX1,FUS,RPL18A,RPS6,CHMP5,GAPDH,RPL7A,HNRNPUL1,CALD1,CGN,KPRP,ALYREF,SF3B2,LMNA,YBX1,IFT20,CPSF6,SAPS3,YWHAZ,CCT4,SRSF6,TXN,PCM1,DNAH8,HMGN1,NUFIP2,TPI1,MAP4,MYH11,RPS27A,DSP,JUP,TPM1,TPM4,TPM3,DBN1,MYL1,TACC2,PPIA,MYL6,RBMX,BTF3
GO:CC	sarcomere	GO:0030017	0.00630596	2.20025	211	6	PDLIM5,JUP,TPM1,TPM4,TPM3,MYL1
GO:CC	striated muscle thin filament	GO:0005865	0.00843476	2.07393	23	3	TPM1,TPM4,TPM3
GO:CC	stress fiber	GO:0001725	0.0104526	1.98078	70	4	PDLIM5,TPM1,TPM4,TPM3
GO:CC	contractile actin filament bundle	GO:0097517	0.0104526	1.98078	70	4	PDLIM5,TPM1,TPM4,TPM3
GO:CC	myofilament	GO:0036379	0.0138213	1.85945	27	3	TPM1,TPM4,TPM3
GO:CC	U12-type spliceosomal complex	GO:0005689	0.0154493	1.81109	28	3	SNRPD1,SF3B2,YBX1
GO:CC	actin filament bundle	GO:0032432	0.015995	1.79602	78	4	PDLIM5,TPM1,TPM4,TPM3
GO:CC	anchoring junction	GO:0070161	0.0223984	1.64978	838	10	RPS8,PDLIM5,RPL7A,CGN,YWHAZ,DSP,JUP,TPM4,DBN1,PPIA
GO:CC	spliceosomal complex	GO:0005681	0.0469658	1.32822	192	5	SNRPD1,RBM3,SF3B2,YBX1,RBMX
KEGG	Spliceosome	KEGG:03040	0.00208905	2.68005	150	6	SNRPD1,FUS,ALYREF,SF3B2,SRSF6,RBMX
KEGG	Ribosome	KEGG:03010	0.00233679	2.63138	153	6	RPS8,RPL34,RPL18A,RPS6,RPL7A,RPS27A
KEGG	Coronavirus disease - COVID-19	KEGG:05171	0.0227924	1.64221	231	6	RPS8,RPL34,RPL18A,RPS6,RPL7A,RPS27A
KEGG	Hypertrophic cardiomyopathy	KEGG:05410	0.0348138	1.45825	90	4	LMNA,TPM1,TPM4,TPM3
KEGG	Dilated cardiomyopathy	KEGG:05414	0.0427506	1.36906	95	4	LMNA,TPM1,TPM4,TPM3
REAC	Smooth Muscle Contraction	REAC:R-HSA-445355	1.96267e-06	5.70715	38	6	CALD1,MYH11,TPM1,TPM4,TPM3,MYL6
REAC	Metabolism of RNA	REAC:R-HSA-8953854	2.92991e-05	4.53315	662	14	RPS8,SNRPD1,RPL34,FUS,RPL18A,RPS6,RPL7A,HNRNPUL1,SF3B2,YBX1,YWHAZ,SRSF6,RPS27A,RBMX
REAC	Selenoamino acid metabolism	REAC:R-HSA-2408522	9.34031e-05	4.02964	117	7	AIMP1,RPS8,RPL34,RPL18A,RPS6,RPL7A,RPS27A
REAC	Viral mRNA Translation	REAC:R-HSA-192823	0.000381997	3.41794	90	6	RPS8,RPL34,RPL18A,RPS6,RPL7A,RPS27A
REAC	Peptide chain elongation	REAC:R-HSA-156902	0.000381997	3.41794	90	6	RPS8,RPL34,RPL18A,RPS6,RPL7A,RPS27A
REAC	Eukaryotic Translation Elongation	REAC:R-HSA-156842	0.000493919	3.30634	94	6	RPS8,RPL34,RPL18A,RPS6,RPL7A,RPS27A
REAC	Eukaryotic Translation Termination	REAC:R-HSA-72764	0.000493919	3.30634	94	6	RPS8,RPL34,RPL18A,RPS6,RPL7A,RPS27A
REAC	Selenocysteine synthesis	REAC:R-HSA-2408557	0.000493919	3.30634	94	6	RPS8,RPL34,RPL18A,RPS6,RPL7A,RPS27A
REAC	Nonsense Mediated Decay (NMD) independent of the Exon Junction Complex (EJC)	REAC:R-HSA-975956	0.000559185	3.25244	96	6	RPS8,RPL34,RPL18A,RPS6,RPL7A,RPS27A
REAC	Response of EIF2AK4 (GCN2) to amino acid deficiency	REAC:R-HSA-9633012	0.000798522	3.09771	102	6	RPS8,RPL34,RPL18A,RPS6,RPL7A,RPS27A
REAC	Formation of a pool of free 40S subunits	REAC:R-HSA-72689	0.000798522	3.09771	102	6	RPS8,RPL34,RPL18A,RPS6,RPL7A,RPS27A
REAC	Budding and maturation of HIV virion	REAC:R-HSA-162588	0.0012614	2.89915	28	4	CHMP4B,CHMP5,RPS27A,PPIA
REAC	L13a-mediated translational silencing of Ceruloplasmin expression	REAC:R-HSA-156827	0.00137906	2.86042	112	6	RPS8,RPL34,RPL18A,RPS6,RPL7A,RPS27A
REAC	GTP hydrolysis and joining of the 60S ribosomal subunit	REAC:R-HSA-72706	0.00145227	2.83795	113	6	RPS8,RPL34,RPL18A,RPS6,RPL7A,RPS27A
REAC	SRP-dependent cotranslational protein targeting to membrane	REAC:R-HSA-1799339	0.00145227	2.83795	113	6	RPS8,RPL34,RPL18A,RPS6,RPL7A,RPS27A
REAC	mRNA Splicing - Major Pathway	REAC:R-HSA-72163	0.00158061	2.80117	178	7	SNRPD1,FUS,HNRNPUL1,SF3B2,YBX1,SRSF6,RBMX
REAC	Nonsense-Mediated Decay (NMD)	REAC:R-HSA-927802	0.0016911	2.77183	116	6	RPS8,RPL34,RPL18A,RPS6,RPL7A,RPS27A
REAC	Nonsense Mediated Decay (NMD) enhanced by the Exon Junction Complex (EJC)	REAC:R-HSA-975957	0.0016911	2.77183	116	6	RPS8,RPL34,RPL18A,RPS6,RPL7A,RPS27A
REAC	Eukaryotic Translation Initiation	REAC:R-HSA-72613	0.00205832	2.68649	120	6	RPS8,RPL34,RPL18A,RPS6,RPL7A,RPS27A
REAC	Cap-dependent Translation Initiation	REAC:R-HSA-72737	0.00205832	2.68649	120	6	RPS8,RPL34,RPL18A,RPS6,RPL7A,RPS27A
REAC	mRNA Splicing	REAC:R-HSA-72172	0.0021131	2.67508	186	7	SNRPD1,FUS,HNRNPUL1,SF3B2,YBX1,SRSF6,RBMX
REAC	Muscle contraction	REAC:R-HSA-397014	0.002883	2.54016	195	7	CALD1,MYH11,TPM1,TPM4,TPM3,MYL1,MYL6
REAC	Striated Muscle Contraction	REAC:R-HSA-390522	0.0035489	2.44991	36	4	TPM1,TPM4,TPM3,MYL1
REAC	Influenza Viral RNA Transcription and Replication	REAC:R-HSA-168273	0.00372378	2.42902	133	6	RPS8,RPL34,RPL18A,RPS6,RPL7A,RPS27A
REAC	Influenza Infection	REAC:R-HSA-168255	0.00797637	2.09819	152	6	RPS8,RPL34,RPL18A,RPS6,RPL7A,RPS27A
REAC	Cellular response to starvation	REAC:R-HSA-9711097	0.00958025	2.01862	157	6	RPS8,RPL34,RPL18A,RPS6,RPL7A,RPS27A
REAC	Processing of Capped Intron-Containing Pre-mRNA	REAC:R-HSA-72203	0.0102264	1.99028	237	7	SNRPD1,FUS,HNRNPUL1,SF3B2,YBX1,SRSF6,RBMX
REAC	mRNA Splicing - Minor Pathway	REAC:R-HSA-72165	0.0144394	1.84045	51	4	SNRPD1,SF3B2,YBX1,SRSF6
REAC	Regulation of expression of SLITs and ROBOs	REAC:R-HSA-9010553	0.0154943	1.80983	171	6	RPS8,RPL34,RPL18A,RPS6,RPL7A,RPS27A
REAC	Major pathway of rRNA processing in the nucleolus and cytosol	REAC:R-HSA-6791226	0.0226284	1.64535	183	6	RPS8,RPL34,RPL18A,RPS6,RPL7A,RPS27A
REAC	rRNA processing in the nucleus and cytosol	REAC:R-HSA-8868773	0.0303976	1.51716	193	6	RPS8,RPL34,RPL18A,RPS6,RPL7A,RPS27A
REAC	Translation	REAC:R-HSA-72766	0.0383611	1.41611	292	7	AIMP1,RPS8,RPL34,RPL18A,RPS6,RPL7A,RPS27A
REAC	rRNA processing	REAC:R-HSA-72312	0.0401635	1.39617	203	6	RPS8,RPL34,RPL18A,RPS6,RPL7A,RPS27A
WP	Cytoplasmic Ribosomal Proteins	WP:WP477	0.000327576	3.48469	90	6	RPS8,RPL34,RPL18A,RPS6,RPL7A,RPS27A
WP	Striated Muscle Contraction Pathway	WP:WP383	0.00281474	2.55056	38	4	TPM1,TPM4,TPM3,MYL1
WP	mRNA Processing	WP:WP411	0.00312882	2.50462	133	6	SNRPD1,FUS,SF3B2,YBX1,SRSF6,RBMX
MIRNA	hsa-miR-615-3p	MIRNA:hsa-miR-615-3p	0.000273699	3.56273	892	14	SNRPD1,FUS,GAPDH,RPL7A,ALYREF,SF3B2,LMNA,YBX1,SAPS3,YWHAZ,TPI1,JUP,TPM3,DBN1
MIRNA	hsa-miR-149-5p	MIRNA:hsa-miR-149-5p	0.0021308	2.67146	394	9	RPL34,RPL18A,GAPDH,CALD1,ALYREF,YBX1,CCT4,TXN,DBN1
MIRNA	hsa-miR-6744-5p	MIRNA:hsa-miR-6744-5p	0.0336132	1.47349	67	4	FUS,YBX1,YWHAZ,TPI1
HPA	testis; sertoli cells[‚â•Medium]	HPA:0570802	0.000227792	3.64246	1682	20	CHMP4B,ANKRD50,SNRPD1,FUS,HNRNPUL1,CALD1,CGN,ALYREF,LMNA,CPSF6,SAPS3,CCT4,SRSF6,PCM1,HMGN1,MAP4,RPS27A,JUP,TACC2,RBMX
HPA	oral mucosa; squamous epithelial cells[High]	HPA:0330223	0.00047323	3.32493	1133	16	SNRPD1,FUS,RPS6,GAPDH,HNRNPUL1,ALYREF,SF3B2,LMNA,YBX1,CPSF6,SRSF6,HMGN1,RPS27A,JUP,TPM4,BTF3
HPA	skin 1; keratinocytes[High]	HPA:0460663	0.000535079	3.27158	869	14	FUS,GAPDH,HNRNPUL1,ALYREF,SF3B2,LMNA,CPSF6,YWHAZ,SRSF6,HMGN1,RPS27A,DSP,JUP,RBMX
HPA	endometrium 1; cells in endometrial stroma[‚â•Medium]	HPA:0160252	0.000802185	3.09573	2178	22	FUS,RPS6,GAPDH,HNRNPUL1,CALD1,ALYREF,SF3B2,LMNA,YBX1,IFT20,CPSF6,SAPS3,YWHAZ,SRSF6,HMGN1,MAP4,RPS27A,TPM4,TPM3,DBN1,RBMX,BTF3
HPA	testis; peritubular cells[‚â•Medium]	HPA:0570772	0.00148283	2.82891	462	10	ANKRD50,FUS,HNRNPUL1,CALD1,ALYREF,LMNA,CPSF6,SRSF6,HMGN1,RBMX
HPA	testis; peritubular cells[High]	HPA:0570773	0.0017957	2.74577	199	7	ANKRD50,FUS,HNRNPUL1,CALD1,ALYREF,LMNA,HMGN1
HPA	vagina; squamous epithelial cells[High]	HPA:0620223	0.00193576	2.71315	1113	15	FUS,RPS6,GAPDH,HNRNPUL1,ALYREF,SF3B2,LMNA,CPSF6,SRSF6,HMGN1,RPS27A,DSP,JUP,RBMX,BTF3
HPA	soft tissue 2; peripheral nerve[High]	HPA:0510703	0.00197163	2.70517	283	8	FUS,RPS6,ALYREF,CPSF6,SRSF6,HMGN1,MAP4,RPS27A
HPA	smooth muscle; smooth muscle cells[High]	HPA:0490693	0.00255281	2.59298	605	11	ANKRD50,FUS,CALD1,ALYREF,LMNA,CPSF6,HMGN1,MYH11,RPS27A,TPM1,BTF3
HPA	cervix, uterine; squamous epithelial cells[High]	HPA:0110223	0.00295531	2.5294	1007	14	FUS,RPS6,HNRNPUL1,SF3B2,LMNA,CPSF6,YWHAZ,SRSF6,HMGN1,MAP4,RPS27A,JUP,TPM4,RBMX
HPA	liver; cholangiocytes[High]	HPA:0291163	0.00418027	2.3788	314	8	FUS,HNRNPUL1,ALYREF,LMNA,YWHAZ,HMGN1,JUP,BTF3
HPA	endometrium 1; cells in endometrial stroma[High]	HPA:0160253	0.00440501	2.35605	415	9	FUS,HNRNPUL1,CALD1,ALYREF,LMNA,CPSF6,HMGN1,MAP4,RBMX
HPA	ovary; ovarian stroma cells[‚â•Medium]	HPA:0340462	0.00446911	2.34978	2033	20	FUS,GAPDH,HNRNPUL1,CALD1,ALYREF,SF3B2,LMNA,YBX1,IFT20,CPSF6,SAPS3,YWHAZ,SRSF6,HMGN1,MAP4,MYH11,RPS27A,JUP,TPM3,RBMX
HPA	soft tissue 1; fibroblasts[High]	HPA:0500653	0.00488574	2.31107	530	10	FUS,ALYREF,LMNA,YBX1,IFT20,CPSF6,SRSF6,HMGN1,MAP4,TPM3
HPA	skin 2; epidermal cells[High]	HPA:0470683	0.00540466	2.26723	1369	16	FUS,RPS6,GAPDH,HNRNPUL1,ALYREF,SF3B2,LMNA,YBX1,CPSF6,YWHAZ,SRSF6,HMGN1,RPS27A,JUP,TPM4,BTF3
HPA	esophagus; squamous epithelial cells[‚â•Medium]	HPA:0190222	0.00562354	2.24999	4989	33	AIMP1,CHMP4B,ANKRD50,SNRPD1,RBM3,PDLIM5,FUS,RPL18A,RPS6,GAPDH,HNRNPUL1,CGN,ALYREF,SF3B2,LMNA,YBX1,IFT20,CPSF6,SAPS3,YWHAZ,SRSF6,TXN,PCM1,HMGN1,MAP4,RPS27A,DSP,JUP,TPM4,TPM3,TACC2,RBMX,BTF3
HPA	oral mucosa; squamous epithelial cells[‚â•Low]	HPA:0330221	0.00567873	2.24575	6161	37	AIMP1,CHMP4B,ANKRD50,SNRPD1,RBM3,PDLIM5,FUS,RPL18A,RPS6,GAPDH,HNRNPUL1,CALD1,ALYREF,SF3B2,LMNA,YBX1,IFT20,CPSF6,SAPS3,YWHAZ,CCT4,SRSF6,TXN,PCM1,HMGN1,MAP4,RPS27A,DSP,JUP,TPM1,TPM4,TPM3,DBN1,TACC2,MYL6,RBMX,BTF3
HPA	oral mucosa	HPA:0330000	0.00567873	2.24575	6161	37	AIMP1,CHMP4B,ANKRD50,SNRPD1,RBM3,PDLIM5,FUS,RPL18A,RPS6,GAPDH,HNRNPUL1,CALD1,ALYREF,SF3B2,LMNA,YBX1,IFT20,CPSF6,SAPS3,YWHAZ,CCT4,SRSF6,TXN,PCM1,HMGN1,MAP4,RPS27A,DSP,JUP,TPM1,TPM4,TPM3,DBN1,TACC2,MYL6,RBMX,BTF3
HPA	caudate; glial cells[High]	HPA:0080123	0.00650167	2.18698	669	11	FUS,HNRNPUL1,ALYREF,SF3B2,LMNA,CPSF6,YWHAZ,SRSF6,HMGN1,MAP4,RPS27A
HPA	testis; sertoli cells[‚â•Low]	HPA:0570801	0.00679247	2.16797	2279	21	AIMP1,CHMP4B,ANKRD50,SNRPD1,FUS,HNRNPUL1,CALD1,CGN,ALYREF,LMNA,CPSF6,SAPS3,CCT4,SRSF6,PCM1,HMGN1,MAP4,RPS27A,JUP,TACC2,RBMX
HPA	endometrium 2; cells in endometrial stroma[‚â•Medium]	HPA:0170252	0.00832405	2.07967	1756	18	FUS,RPS6,HNRNPUL1,CALD1,ALYREF,SF3B2,LMNA,YBX1,IFT20,CPSF6,YWHAZ,TXN,PCM1,HMGN1,MAP4,RPS27A,DBN1,RBMX
HPA	endometrium 1; glandular cells[High]	HPA:0160053	0.00969771	2.01333	1435	16	FUS,HNRNPUL1,ALYREF,SF3B2,LMNA,IFT20,CPSF6,SAPS3,YWHAZ,SRSF6,HMGN1,RPS27A,JUP,TPM4,RBMX,BTF3
HPA	skin 1; Langerhans[‚â•Medium]	HPA:0460642	0.0100101	1.99956	3159	25	SNRPD1,RBM3,FUS,RPS6,GAPDH,HNRNPUL1,ALYREF,SF3B2,LMNA,YBX1,IFT20,CPSF6,SAPS3,YWHAZ,SRSF6,TXN,HMGN1,MAP4,RPS27A,DSP,JUP,TPM4,TACC2,RBMX,BTF3
HPA	skin 1; fibroblasts[High]	HPA:0460653	0.0105805	1.9755	839	12	FUS,GAPDH,HNRNPUL1,ALYREF,IFT20,CPSF6,SRSF6,HMGN1,MAP4,RPS27A,TPM3,RBMX
HPA	esophagus; squamous epithelial cells[High]	HPA:0190223	0.0109092	1.96221	1617	17	FUS,RPS6,HNRNPUL1,ALYREF,SF3B2,LMNA,YBX1,IFT20,CPSF6,YWHAZ,SRSF6,HMGN1,RPS27A,JUP,TPM4,RBMX,BTF3
HPA	skeletal muscle; myocytes[High]	HPA:0440343	0.0120089	1.9205	850	12	PDLIM5,FUS,ALYREF,LMNA,CPSF6,RPS27A,TPM1,TPM4,TPM3,MYL1,MYL6,RBMX
HPA	soft tissue 2; fibroblasts[High]	HPA:0510653	0.0190036	1.72116	501	9	FUS,ALYREF,YBX1,IFT20,CPSF6,SRSF6,HMGN1,MAP4,TPM3
HPA	breast; myoepithelial cells[‚â•Medium]	HPA:0050092	0.0200159	1.69863	3736	27	ANKRD50,SNRPD1,PDLIM5,FUS,RPS6,HNRNPUL1,CALD1,ALYREF,SF3B2,LMNA,YBX1,IFT20,CPSF6,SAPS3,YWHAZ,SRSF6,TXN,MAP4,MYH11,RPS27A,JUP,TPM4,TPM3,TACC2,MYL6,RBMX,BTF3
HPA	smooth muscle; smooth muscle cells[‚â•Medium]	HPA:0490692	0.0209715	1.67837	3073	24	ANKRD50,PDLIM5,FUS,GAPDH,HNRNPUL1,CALD1,ALYREF,SF3B2,LMNA,CPSF6,SAPS3,YWHAZ,SRSF6,HMGN1,MAP4,MYH11,RPS27A,TPM1,TPM4,TPM3,TACC2,MYL6,RBMX,BTF3
HPA	tonsil; germinal center cells[High]	HPA:0600433	0.0228554	1.64101	1211	14	FUS,HNRNPUL1,ALYREF,SF3B2,LMNA,CPSF6,SAPS3,YWHAZ,SRSF6,HMGN1,RPS27A,TPM4,RBMX,BTF3
HPA	testis; peritubular cells[‚â•Low]	HPA:0570771	0.0235638	1.62775	639	10	ANKRD50,FUS,HNRNPUL1,CALD1,ALYREF,LMNA,CPSF6,SRSF6,HMGN1,RBMX
HPA	breast; glandular cells[‚â•Medium]	HPA:0050052	0.0245538	1.60988	5024	32	AIMP1,CHMP4B,ANKRD50,SNRPD1,PDLIM5,FUS,RPL18A,RPS6,GAPDH,HNRNPUL1,CGN,ALYREF,SF3B2,LMNA,YBX1,IFT20,CPSF6,SAPS3,YWHAZ,CCT4,SRSF6,TXN,HMGN1,MAP4,RPS27A,JUP,TPM4,TPM3,TACC2,MYL6,RBMX,BTF3
HPA	urinary bladder; urothelial cells[‚â•Medium]	HPA:0610832	0.025543	1.59273	5873	35	AIMP1,ANKRD50,SNRPD1,RBM3,PDLIM5,FUS,RPL18A,RPS6,CHMP5,GAPDH,HNRNPUL1,CGN,ALYREF,SF3B2,LMNA,YBX1,IFT20,CPSF6,SAPS3,YWHAZ,CCT4,SRSF6,TXN,PCM1,HMGN1,MAP4,RPS27A,JUP,TPM4,TPM3,DBN1,TACC2,MYL6,RBMX,BTF3
HPA	breast; adipocytes[High]	HPA:0050013	0.0266158	1.57486	304	7	FUS,HNRNPUL1,ALYREF,LMNA,CPSF6,SRSF6,HMGN1
HPA	soft tissue 1; chondrocytes[High]	HPA:0500113	0.0294352	1.53113	309	7	FUS,GAPDH,ALYREF,SF3B2,IFT20,CPSF6,SRSF6
HPA	colon; endothelial cells[High]	HPA:0130203	0.0297711	1.5262	792	11	ANKRD50,FUS,HNRNPUL1,ALYREF,LMNA,CPSF6,SRSF6,HMGN1,MAP4,TPM3,RBMX
HPA	ovary	HPA:0340000	0.0312094	1.50571	5348	33	AIMP1,CHMP4B,FUS,RPL18A,RPS6,GAPDH,HNRNPUL1,CALD1,CGN,ALYREF,SF3B2,LMNA,YBX1,IFT20,CPSF6,SAPS3,YWHAZ,CCT4,SRSF6,TXN,PCM1,HMGN1,MAP4,MYH11,RPS27A,DSP,JUP,TPM4,TPM3,DBN1,TACC2,RBMX,BTF3
HPA	vagina	HPA:0620000	0.0319248	1.49587	5923	35	AIMP1,CHMP4B,ANKRD50,SNRPD1,RBM3,PDLIM5,FUS,RPL18A,RPS6,GAPDH,HNRNPUL1,CGN,ALYREF,SF3B2,LMNA,YBX1,IFT20,CPSF6,SAPS3,YWHAZ,CCT4,SRSF6,TXN,PCM1,HMGN1,MAP4,RPS27A,DSP,JUP,TPM4,TPM3,TACC2,MYL6,RBMX,BTF3
HPA	vagina; squamous epithelial cells[‚â•Low]	HPA:0620221	0.0319248	1.49587	5923	35	AIMP1,CHMP4B,ANKRD50,SNRPD1,RBM3,PDLIM5,FUS,RPL18A,RPS6,GAPDH,HNRNPUL1,CGN,ALYREF,SF3B2,LMNA,YBX1,IFT20,CPSF6,SAPS3,YWHAZ,CCT4,SRSF6,TXN,PCM1,HMGN1,MAP4,RPS27A,DSP,JUP,TPM4,TPM3,TACC2,MYL6,RBMX,BTF3
HPA	hippocampus; glial cells[High]	HPA:0250123	0.0321322	1.49306	537	9	FUS,HNRNPUL1,ALYREF,SF3B2,LMNA,CPSF6,YWHAZ,HMGN1,MAP4
HPA	fallopian tube; glandular cells[High]	HPA:0210053	0.0345724	1.46127	1771	17	FUS,RPS6,HNRNPUL1,CGN,ALYREF,SF3B2,LMNA,CPSF6,SAPS3,YWHAZ,SRSF6,HMGN1,RPS27A,JUP,TPM4,RBMX,BTF3
HPA	testis; sertoli cells[High]	HPA:0570803	0.0368992	1.43298	547	9	FUS,HNRNPUL1,ALYREF,LMNA,CPSF6,SAPS3,HMGN1,RPS27A,RBMX
HPA	small intestine; glandular cells[High]	HPA:0480053	0.0392954	1.40566	2762	22	CHMP4B,FUS,RPS6,HNRNPUL1,CGN,ALYREF,SF3B2,LMNA,YBX1,IFT20,CPSF6,SAPS3,YWHAZ,SRSF6,TXN,HMGN1,MAP4,RPS27A,JUP,TPM4,RBMX,BTF3
HPA	breast; myoepithelial cells[High]	HPA:0050093	0.0399599	1.39838	819	11	ANKRD50,FUS,HNRNPUL1,ALYREF,SF3B2,LMNA,CPSF6,YWHAZ,SRSF6,MYH11,TPM4
HPA	salivary gland; glandular cells[High]	HPA:0420053	0.0403056	1.39463	1443	15	FUS,GAPDH,HNRNPUL1,ALYREF,SF3B2,LMNA,IFT20,CPSF6,SRSF6,HMGN1,RPS27A,JUP,TPM4,RBMX,BTF3
HPA	tonsil; squamous epithelial cells[High]	HPA:0600223	0.0432015	1.3645	1452	15	FUS,RPS6,HNRNPUL1,ALYREF,SF3B2,LMNA,YBX1,CPSF6,YWHAZ,SRSF6,HMGN1,JUP,TPM4,RBMX,BTF3
HPA	stomach 2; glandular cells[High]	HPA:0550053	0.0446697	1.34999	2378	20	CHMP4B,SNRPD1,FUS,RPS6,HNRNPUL1,CGN,ALYREF,SF3B2,LMNA,YBX1,IFT20,CPSF6,SAPS3,YWHAZ,SRSF6,HMGN1,RPS27A,JUP,TPM4,RBMX
HPA	urinary bladder; urothelial cells[High]	HPA:0610833	0.0451081	1.34575	1994	18	FUS,RPS6,HNRNPUL1,ALYREF,SF3B2,LMNA,IFT20,CPSF6,SAPS3,YWHAZ,SRSF6,HMGN1,MAP4,RPS27A,JUP,TPM4,RBMX,BTF3
HPA	cervix, uterine; squamous epithelial cells[‚â•Medium]	HPA:0110222	0.0452504	1.34438	3666	26	AIMP1,SNRPD1,RBM3,FUS,RPL18A,RPS6,HNRNPUL1,SF3B2,LMNA,YBX1,IFT20,CPSF6,SAPS3,YWHAZ,SRSF6,TXN,PCM1,HMGN1,MAP4,RPS27A,JUP,TPM4,TPM3,TACC2,RBMX,BTF3
HPA	tonsil; non-germinal center cells[High]	HPA:0600443	0.046295	1.33447	1294	14	FUS,RPS6,HNRNPUL1,ALYREF,SF3B2,LMNA,IFT20,CPSF6,SAPS3,YWHAZ,SRSF6,HMGN1,RPS27A,RBMX
HPA	heart muscle; cardiomyocytes[High]	HPA:0241103	0.0469587	1.32828	1135	13	ANKRD50,PDLIM5,FUS,HNRNPUL1,ALYREF,SF3B2,LMNA,CPSF6,SRSF6,DSP,JUP,TPM1,TPM4
CORUM	Ribosome, cytoplasmic	CORUM:306	0.00816496	2.08805	80	6	RPS8,RPL34,RPL18A,RPS6,RPL7A,RPS27A
HP	Contractures of the joints of the lower limbs	HP:0005750	0.00613854	2.21194	167	6	PDX1,FUS,LMNA,DSP,JUP,TPM3
HP	Reduced systolic function	HP:0006673	0.0074283	2.12911	13	3	DSP,JUP,TPM3
HP	Alopecia totalis	HP:0007418	0.0074283	2.12911	13	3	LMNA,DSP,JUP

## Sheet: Figure 1C
source	term_name	term_id	adjusted_p_value	negative_log10_of_adjusted_p_value	term_size	intersection_size	intersections
GO:CC	ribonucleoprotein complex	GO:1990904	1.77768e-23	22.7501	694	38	RPS8,SNRPD1,RBM3,RPL34,FUS,RPL18A,RPS6,GAPDH,RPL7A,SF3B2,YBX1,CPSF6,AKAP8L,RPL11,TRA2B,SNRPN,RPS27L,NUFIP2,RPS27A,RBMX,HNRNPAB,HNRNPA3,HNRNPD,HSPA8,RPL13,ILF2,RPL24,SNRPD3,RPL23A,RPS20,HSPA1B,MFAP1,RBM14,RPS9,HNRNPF,RSL1D1,BTF3,TRIM21
GO:CC	cytosolic ribosome	GO:0022626	3.11006e-11	10.5072	106	13	RPS8,RPL34,RPL18A,RPS6,RPL7A,RPL11,RPS27L,RPS27A,RPL13,RPL24,RPL23A,RPS20,RPS9
GO:CC	protein-containing complex	GO:0032991	1.19533e-10	9.92251	5541	72	AIMP1,CHMP4B,RPS8,SNRPD1,RBM3,PDLIM5,RPL34,FUS,RPL18A,RPS6,GAPDH,RPL7A,CGN,SF3B2,YBX1,IFT20,CPSF6,NUP205,ZC3H13,WTAP,RIPK2,PEX5,ADSL,TJP1,CGNL1,NUDT21,AKAP8L,GJA1,RPL11,TRA2B,SNRPN,RPS27L,TUBB,AIMP2,DDB1,CCT4,PCM1,DNAH8,NUFIP2,MAP4,MYH11,RPS27A,JUP,TPM1,TPM4,TPM3,MYL1,PPIA,MYL6,RBMX,HNRNPAB,PDE4D,HNRNPA3,HNRNPD,HSPA8,CBLL1,DLAT,RPL13,ILF2,RPL24,SNRPD3,RPL23A,RPS20,HSPA1B,MFAP1,RBM14,RPS9,SLC25A6,…
GO:CC	cytosol	GO:0005829	3.11555e-10	9.50647	5361	70	AIMP1,CHMP4B,RPS8,DENND1A,SNRPD1,PDLIM5,RPL34,PDX1,RPL18A,RPS6,CHMP5,GAPDH,RPL7A,CALD1,LMNA,YBX1,SAPS3,NUP205,TACC3,MOV10,SPAG9,RIPK2,TAX1BP1,PEX5,ADSL,TJP2,TBC1D4,TJP1,RPL11,PDE4C,RPS27L,TUBB,YBX3,CCDC6,CBS,AIMP2,YWHAZ,CCT4,TXN,PCM1,NUFIP2,TPI1,MAP4,MYH11,RPS27A,JUP,TPM1,TPM4,TPM3,DBN1,MYL1,TACC2,PPIA,MYL6,PDE4D,PCMT1,HNRNPD,CFL1,HSPA8,CBLL1,RPL13,RPL24,SNRPD3,RPL23A,RPS20,HSPA1B,RPS9,HNRNPF,BTF…
GO:CC	ribosome	GO:0005840	8.78587e-10	9.05622	247	16	RPS8,RBM3,RPL34,RPL18A,RPS6,RPL7A,RPL11,RPS27L,NUFIP2,RPS27A,RPL13,RPL24,RPL23A,RPS20,RPS9,BTF3
GO:CC	ribosomal subunit	GO:0044391	4.23847e-09	8.37279	191	14	RPS8,RBM3,RPL34,RPL18A,RPS6,RPL7A,RPL11,RPS27L,RPS27A,RPL13,RPL24,RPL23A,RPS20,RPS9
GO:CC	intracellular non-membrane-bounded organelle	GO:0043232	5.51702e-08	7.2583	5094	64	RPS8,RBM3,PDLIM5,RPL34,PDX1,RPL18A,RPS6,GAPDH,RPL7A,CALD1,CGN,LMNA,YBX1,IFT20,CPSF6,TACC3,MOV10,SPAG9,RIPK2,TJP1,CGNL1,NUDT21,AKAP8L,RPL11,RPS27L,TUBB,CCDC6,DDB1,CCT4,PCM1,DNAH8,HMGN1,NUFIP2,MAP4,MYH11,RPS27A,DSP,JUP,TPM1,TPM4,TPM3,DBN1,MYL1,TACC2,MYL6,RBMX,PDE4D,HNRNPA3,CFL1,HSPA8,DDX31,RPL13,ILF2,RPL24,TUFM,RPL23A,RPS20,HSPA1B,MFAP1,RBM14,RPS9,RSL1D1,BTF3,TRIM21
GO:CC	non-membrane-bounded organelle	GO:0043228	5.92477e-08	7.22733	5102	64	RPS8,RBM3,PDLIM5,RPL34,PDX1,RPL18A,RPS6,GAPDH,RPL7A,CALD1,CGN,LMNA,YBX1,IFT20,CPSF6,TACC3,MOV10,SPAG9,RIPK2,TJP1,CGNL1,NUDT21,AKAP8L,RPL11,RPS27L,TUBB,CCDC6,DDB1,CCT4,PCM1,DNAH8,HMGN1,NUFIP2,MAP4,MYH11,RPS27A,DSP,JUP,TPM1,TPM4,TPM3,DBN1,MYL1,TACC2,MYL6,RBMX,PDE4D,HNRNPA3,CFL1,HSPA8,DDX31,RPL13,ILF2,RPL24,TUFM,RPL23A,RPS20,HSPA1B,MFAP1,RBM14,RPS9,RSL1D1,BTF3,TRIM21
GO:CC	organelle	GO:0043226	1.49505e-07	6.82534	14027	112	AIMP1,CHMP4B,RPS8,ANKRD50,DENND1A,SNRPD1,RBM3,PDLIM5,RPL34,PDX1,FUS,RPL18A,RPS6,CHMP5,GAPDH,RPL7A,HNRNPUL1,CALD1,CGN,KPRP,ALYREF,SF3B2,LMNA,YBX1,IFT20,CPSF6,SAPS3,TMX3,NUP205,ZC3H13,TACC3,WTAP,MOV10,SPAG9,RIPK2,FBLN2,TAX1BP1,LUZP1,CCDC47,PEX5,TJP2,TBC1D4,TJP1,CGNL1,PGAM5,NUDT21,AKAP8L,GJA1,RPL11,TRA2B,PDE4C,SNRPN,RPS27L,TUBB,SRSF12,CGGBP1,YBX3,CCDC6,CBS,AIMP2,DDB1,YWHAZ,CCT4,SRSF6,TXN,PCM1,DNAH8,…
GO:CC	spliceosomal complex	GO:0005681	8.30851e-07	6.08048	192	12	SNRPD1,RBM3,SF3B2,YBX1,TRA2B,SNRPN,RBMX,HNRNPA3,HSPA8,SNRPD3,MFAP1,HNRNPF
GO:CC	nuclear lumen	GO:0031981	2.2518e-06	5.64747	4453	56	RPS8,DENND1A,SNRPD1,RBM3,PDX1,FUS,RPS6,RPL7A,HNRNPUL1,ALYREF,SF3B2,LMNA,YBX1,CPSF6,SAPS3,NUP205,ZC3H13,WTAP,TJP2,NUDT21,AKAP8L,GJA1,RPL11,TRA2B,SNRPN,SRSF12,CGGBP1,DDB1,YWHAZ,CCT4,SRSF6,TXN,HMGN1,NUFIP2,RPS27A,TACC2,RBMX,HNRNPAB,HNRNPA3,HNRNPD,CFL1,HSPA8,DDX31,CBLL1,RPL13,ILF2,SNRPD3,RPL23A,RPS20,HSPA1B,MFAP1,RBM14,RPS9,HNRNPF,RSL1D1,TRIM21
GO:CC	extracellular vesicle	GO:1903561	4.35969e-06	5.36054	2263	37	CHMP4B,RPS8,RPL34,CHMP5,GAPDH,KPRP,YBX1,SPAG9,FBLN2,TAX1BP1,LUZP1,RPL11,TUBB,DDB1,YWHAZ,CCT4,TXN,TPI1,MYH11,RPS27A,DSP,JUP,TPM4,TPM3,PPIA,MYL6,RBMX,PCMT1,CFL1,HSPA8,RPL24,TUFM,RPL23A,RPS20,SBSN,HSPA1B,RPS9
GO:CC	extracellular membrane-bounded organelle	GO:0065010	4.46438e-06	5.35024	2265	37	CHMP4B,RPS8,RPL34,CHMP5,GAPDH,KPRP,YBX1,SPAG9,FBLN2,TAX1BP1,LUZP1,RPL11,TUBB,DDB1,YWHAZ,CCT4,TXN,TPI1,MYH11,RPS27A,DSP,JUP,TPM4,TPM3,PPIA,MYL6,RBMX,PCMT1,CFL1,HSPA8,RPL24,TUFM,RPL23A,RPS20,SBSN,HSPA1B,RPS9
GO:CC	extracellular organelle	GO:0043230	4.46438e-06	5.35024	2265	37	CHMP4B,RPS8,RPL34,CHMP5,GAPDH,KPRP,YBX1,SPAG9,FBLN2,TAX1BP1,LUZP1,RPL11,TUBB,DDB1,YWHAZ,CCT4,TXN,TPI1,MYH11,RPS27A,DSP,JUP,TPM4,TPM3,PPIA,MYL6,RBMX,PCMT1,CFL1,HSPA8,RPL24,TUFM,RPL23A,RPS20,SBSN,HSPA1B,RPS9
GO:CC	polysome	GO:0005844	4.73204e-06	5.32495	72	8	FUS,RPL18A,RPS6,RPL7A,RPL11,NUFIP2,RPL24,BTF3
GO:CC	nucleus	GO:0005634	5.36643e-06	5.27031	7607	77	AIMP1,CHMP4B,RPS8,DENND1A,SNRPD1,RBM3,PDX1,FUS,RPS6,CHMP5,GAPDH,RPL7A,HNRNPUL1,ALYREF,SF3B2,LMNA,YBX1,CPSF6,SAPS3,NUP205,ZC3H13,WTAP,MOV10,LUZP1,TJP2,TJP1,NUDT21,AKAP8L,GJA1,RPL11,TRA2B,PDE4C,SNRPN,RPS27L,TUBB,SRSF12,CGGBP1,YBX3,CBS,AIMP2,DDB1,YWHAZ,CCT4,SRSF6,TXN,PCM1,HMGN1,NUFIP2,TPI1,RPS27A,DSP,JUP,TACC2,PPIA,RBMX,HNRNPAB,PDE4D,HNRNPA3,HNRNPD,CFL1,HSPA8,DDX31,CBLL1,RPL13,ILF2,SNRPD3,RPL23A,RPS…
GO:CC	extracellular exosome	GO:0070062	5.58519e-06	5.25296	2178	36	CHMP4B,RPS8,RPL34,CHMP5,GAPDH,KPRP,YBX1,SPAG9,TAX1BP1,LUZP1,RPL11,TUBB,DDB1,YWHAZ,CCT4,TXN,TPI1,MYH11,RPS27A,DSP,JUP,TPM4,TPM3,PPIA,MYL6,RBMX,PCMT1,CFL1,HSPA8,RPL24,TUFM,RPL23A,RPS20,SBSN,HSPA1B,RPS9
GO:CC	intracellular organelle	GO:0043229	8.84148e-06	5.05348	13117	106	AIMP1,CHMP4B,RPS8,ANKRD50,DENND1A,SNRPD1,RBM3,PDLIM5,RPL34,PDX1,FUS,RPL18A,RPS6,CHMP5,GAPDH,RPL7A,HNRNPUL1,CALD1,CGN,ALYREF,SF3B2,LMNA,YBX1,IFT20,CPSF6,SAPS3,TMX3,NUP205,ZC3H13,TACC3,WTAP,MOV10,SPAG9,RIPK2,LUZP1,CCDC47,PEX5,TJP2,TJP1,CGNL1,PGAM5,NUDT21,AKAP8L,GJA1,RPL11,TRA2B,PDE4C,SNRPN,RPS27L,TUBB,SRSF12,CGGBP1,YBX3,CCDC6,CBS,AIMP2,DDB1,YWHAZ,CCT4,SRSF6,TXN,PCM1,DNAH8,HMGN1,NUFIP2,TPI1,MAP4,MYH…
GO:CC	organelle lumen	GO:0043233	8.97254e-06	5.04708	5579	63	RPS8,DENND1A,SNRPD1,RBM3,PDX1,FUS,RPS6,RPL7A,HNRNPUL1,ALYREF,SF3B2,LMNA,YBX1,CPSF6,SAPS3,NUP205,ZC3H13,WTAP,PEX5,TJP2,NUDT21,AKAP8L,GJA1,RPL11,TRA2B,SNRPN,TUBB,SRSF12,CGGBP1,DDB1,YWHAZ,CCT4,SRSF6,TXN,HMGN1,NUFIP2,RPS27A,JUP,TACC2,PPIA,RBMX,HNRNPAB,HNRNPA3,HNRNPD,CFL1,HSPA8,DDX31,CBLL1,DLAT,RPL13,CYR61,ILF2,SNRPD3,TUFM,RPL23A,RPS20,HSPA1B,MFAP1,RBM14,RPS9,HNRNPF,RSL1D1,TRIM21
GO:CC	membrane-enclosed lumen	GO:0031974	8.97254e-06	5.04708	5579	63	RPS8,DENND1A,SNRPD1,RBM3,PDX1,FUS,RPS6,RPL7A,HNRNPUL1,ALYREF,SF3B2,LMNA,YBX1,CPSF6,SAPS3,NUP205,ZC3H13,WTAP,PEX5,TJP2,NUDT21,AKAP8L,GJA1,RPL11,TRA2B,SNRPN,TUBB,SRSF12,CGGBP1,DDB1,YWHAZ,CCT4,SRSF6,TXN,HMGN1,NUFIP2,RPS27A,JUP,TACC2,PPIA,RBMX,HNRNPAB,HNRNPA3,HNRNPD,CFL1,HSPA8,DDX31,CBLL1,DLAT,RPL13,CYR61,ILF2,SNRPD3,TUFM,RPL23A,RPS20,HSPA1B,MFAP1,RBM14,RPS9,HNRNPF,RSL1D1,TRIM21
GO:CC	intracellular organelle lumen	GO:0070013	8.97254e-06	5.04708	5579	63	RPS8,DENND1A,SNRPD1,RBM3,PDX1,FUS,RPS6,RPL7A,HNRNPUL1,ALYREF,SF3B2,LMNA,YBX1,CPSF6,SAPS3,NUP205,ZC3H13,WTAP,PEX5,TJP2,NUDT21,AKAP8L,GJA1,RPL11,TRA2B,SNRPN,TUBB,SRSF12,CGGBP1,DDB1,YWHAZ,CCT4,SRSF6,TXN,HMGN1,NUFIP2,RPS27A,JUP,TACC2,PPIA,RBMX,HNRNPAB,HNRNPA3,HNRNPD,CFL1,HSPA8,DDX31,CBLL1,DLAT,RPL13,CYR61,ILF2,SNRPD3,TUFM,RPL23A,RPS20,HSPA1B,MFAP1,RBM14,RPS9,HNRNPF,RSL1D1,TRIM21
GO:CC	polysomal ribosome	GO:0042788	1.88688e-05	4.72425	34	6	RPL18A,RPL7A,RPL11,NUFIP2,RPL24,BTF3
GO:CC	cytosolic large ribosomal subunit	GO:0022625	1.93873e-05	4.71248	57	7	RPL34,RPL18A,RPL7A,RPL11,RPL13,RPL24,RPL23A
GO:CC	cytoplasm	GO:0005737	2.05063e-05	4.68811	11951	100	AIMP1,CHMP4B,RPS8,ANKRD50,DENND1A,SNRPD1,RBM3,PDLIM5,RPL34,PDX1,FUS,RPL18A,RPS6,CHMP5,GAPDH,RPL7A,CALD1,KPRP,LMNA,YBX1,IFT20,CPSF6,SAPS3,TMX3,NUP205,TACC3,WTAP,INF2,MOV10,SPAG9,RIPK2,TAX1BP1,CCDC47,PEX5,ADSL,TJP2,TBC1D4,TJP1,PGAM5,NUDT21,AKAP8L,GJA1,RPL11,TRA2B,PDE4C,SNRPN,RPS27L,TUBB,SRSF12,YBX3,CCDC6,CBS,AIMP2,DDB1,YWHAZ,CCT4,TXN,PCM1,DNAH8,HMGN1,NUFIP2,TPI1,MAP4,MYH11,RPS27A,DSP,JUP,TPM1,TPM4,…
GO:CC	intracellular anatomical structure	GO:0005622	2.89229e-05	4.53876	14808	112	AIMP1,CHMP4B,RPS8,ANKRD50,DENND1A,SNRPD1,RBM3,PDLIM5,RPL34,PDX1,FUS,RPL18A,RPS6,CHMP5,GAPDH,RPL7A,HNRNPUL1,CALD1,CGN,KPRP,ALYREF,SF3B2,LMNA,YBX1,IFT20,CPSF6,SAPS3,TMX3,NUP205,ZC3H13,TACC3,WTAP,INF2,MOV10,SPAG9,RIPK2,TAX1BP1,LUZP1,CCDC47,PEX5,ADSL,TJP2,TBC1D4,TJP1,CGNL1,PGAM5,NUDT21,AKAP8L,GJA1,RPL11,TRA2B,PDE4C,SNRPN,RPS27L,TUBB,SRSF12,CGGBP1,YBX3,CCDC6,CBS,AIMP2,DDB1,YWHAZ,CCT4,SRSF6,TXN,PCM1,DN…
GO:CC	cytosolic small ribosomal subunit	GO:0022627	0.000123731	3.90752	46	6	RPS8,RPS6,RPS27L,RPS27A,RPS20,RPS9
GO:CC	nucleoplasm	GO:0005654	0.000228009	3.64205	4112	49	RPS8,DENND1A,SNRPD1,RBM3,PDX1,FUS,RPS6,HNRNPUL1,ALYREF,SF3B2,LMNA,YBX1,CPSF6,SAPS3,ZC3H13,WTAP,TJP2,NUDT21,AKAP8L,GJA1,RPL11,TRA2B,SNRPN,SRSF12,CGGBP1,DDB1,YWHAZ,CCT4,SRSF6,TXN,HMGN1,NUFIP2,RPS27A,TACC2,RBMX,HNRNPAB,HNRNPA3,HNRNPD,HSPA8,CBLL1,ILF2,SNRPD3,RPS20,HSPA1B,MFAP1,RBM14,RPS9,HNRNPF,TRIM21
GO:CC	large ribosomal subunit	GO:0015934	0.000243794	3.61298	119	8	RBM3,RPL34,RPL18A,RPL7A,RPL11,RPL13,RPL24,RPL23A
GO:CC	anchoring junction	GO:0070161	0.000287993	3.54062	838	19	RPS8,PDLIM5,RPL7A,CGN,TJP2,TJP1,CGNL1,GJA1,YBX3,YWHAZ,DSP,JUP,TPM4,DBN1,PPIA,CFL1,HSPA8,HSPA1B,RPS9
GO:CC	muscle thin filament tropomyosin	GO:0005862	0.000303806	3.5174	4	3	TPM1,TPM4,TPM3
GO:CC	catalytic step 2 spliceosome	GO:0071013	0.000313971	3.50311	85	7	SNRPD1,SF3B2,SNRPN,RBMX,HNRNPA3,SNRPD3,HNRNPF
GO:CC	nuclear speck	GO:0016607	0.000545342	3.26333	413	13	PDX1,ALYREF,SF3B2,LMNA,CPSF6,ZC3H13,WTAP,AKAP8L,SRSF12,SRSF6,CBLL1,HSPA1B,RBM14
GO:CC	membrane-bounded organelle	GO:0043227	0.000737483	3.13225	13201	103	AIMP1,CHMP4B,RPS8,ANKRD50,DENND1A,SNRPD1,RBM3,RPL34,PDX1,FUS,RPS6,CHMP5,GAPDH,RPL7A,HNRNPUL1,KPRP,ALYREF,SF3B2,LMNA,YBX1,IFT20,CPSF6,SAPS3,TMX3,NUP205,ZC3H13,TACC3,WTAP,MOV10,SPAG9,RIPK2,FBLN2,TAX1BP1,LUZP1,CCDC47,PEX5,TJP2,TBC1D4,TJP1,PGAM5,NUDT21,AKAP8L,GJA1,RPL11,TRA2B,PDE4C,SNRPN,RPS27L,TUBB,SRSF12,CGGBP1,YBX3,CBS,AIMP2,DDB1,YWHAZ,CCT4,SRSF6,TXN,PCM1,DNAH8,HMGN1,NUFIP2,TPI1,MAP4,MYH11,RPS27A,…
GO:CC	actin cytoskeleton	GO:0015629	0.00123196	2.9094	517	14	PDLIM5,CALD1,CGN,TJP1,CGNL1,MYH11,JUP,TPM1,TPM4,TPM3,DBN1,MYL1,MYL6,CFL1
GO:CC	small ribosomal subunit	GO:0015935	0.00248455	2.60475	76	6	RPS8,RPS6,RPS27L,RPS27A,RPS20,RPS9
GO:CC	U2 snRNP	GO:0005686	0.00253143	2.59663	21	4	SNRPD1,SF3B2,SNRPN,SNRPD3
GO:CC	cytoskeleton	GO:0005856	0.00292132	2.53442	2339	32	PDLIM5,GAPDH,CALD1,CGN,LMNA,IFT20,TACC3,SPAG9,RIPK2,TJP1,CGNL1,NUDT21,TUBB,CCDC6,CCT4,PCM1,DNAH8,MAP4,MYH11,DSP,JUP,TPM1,TPM4,TPM3,DBN1,MYL1,TACC2,MYL6,PDE4D,CFL1,HSPA1B,MFAP1
GO:CC	RNA N6-methyladenosine methyltransferase complex	GO:0036396	0.00417714	2.37912	8	3	ZC3H13,WTAP,CBLL1
GO:CC	mRNA editing complex	GO:0045293	0.00417714	2.37912	8	3	ZC3H13,WTAP,CBLL1
GO:CC	supramolecular complex	GO:0099080	0.00585167	2.23272	1325	22	PDLIM5,RPS6,CALD1,LMNA,YBX1,MOV10,TUBB,CCT4,DNAH8,NUFIP2,MAP4,MYH11,DSP,JUP,TPM1,TPM4,TPM3,DBN1,MYL1,HNRNPA3,MFAP1,TRIM21
GO:CC	vesicle	GO:0031982	0.0063336	2.19835	4058	45	CHMP4B,RPS8,ANKRD50,DENND1A,RPL34,CHMP5,GAPDH,KPRP,YBX1,TMX3,SPAG9,RIPK2,FBLN2,TAX1BP1,LUZP1,TBC1D4,GJA1,RPL11,TUBB,DDB1,YWHAZ,CCT4,TXN,TPI1,MYH11,RPS27A,DSP,JUP,TPM4,TPM3,PPIA,MYL6,RBMX,PCMT1,CFL1,HSPA8,ILF2,RPL24,TUFM,RPL23A,RPS20,SBSN,HSPA1B,RPS9,TRIM21
GO:CC	U12-type spliceosomal complex	GO:0005689	0.0083761	2.07696	28	4	SNRPD1,SF3B2,YBX1,SNRPD3
GO:CC	myosin complex	GO:0016459	0.00886195	2.05247	57	5	CGN,CGNL1,MYH11,MYL1,MYL6
GO:CC	U4 snRNP	GO:0005687	0.00887058	2.05205	10	3	SNRPD1,SNRPN,SNRPD3
GO:CC	fascia adherens	GO:0005916	0.00887058	2.05205	10	3	GJA1,DSP,JUP
GO:CC	nuclear body	GO:0016604	0.0137224	1.86257	816	16	PDX1,ALYREF,SF3B2,LMNA,CPSF6,ZC3H13,WTAP,NUDT21,AKAP8L,SRSF12,SRSF6,NUFIP2,CBLL1,SNRPD3,HSPA1B,RBM14
GO:CC	focal adhesion	GO:0005925	0.0194593	1.71087	420	11	RPS8,RPL7A,GJA1,YWHAZ,JUP,TPM4,PPIA,CFL1,HSPA8,HSPA1B,RPS9
GO:CC	cell-substrate junction	GO:0030055	0.022562	1.64662	427	11	RPS8,RPL7A,GJA1,YWHAZ,JUP,TPM4,PPIA,CFL1,HSPA8,HSPA1B,RPS9
GO:CC	cell-cell contact zone	GO:0044291	0.0356227	1.44827	76	5	TJP2,TJP1,GJA1,DSP,JUP
GO:CC	actomyosin	GO:0042641	0.0428222	1.36833	79	5	PDLIM5,TPM1,TPM4,TPM3,DBN1
GO:CC	contractile fiber	GO:0043292	0.0430674	1.36585	242	8	PDLIM5,CALD1,MYH11,JUP,TPM1,TPM4,TPM3,MYL1

## Sheet: Figure S1
			ZO-1 interactors				VEGF-regulated ZO-1 interactors
source	term_name	term_id	adjusted_p_value	negative_log10_of_adjusted_p_value	intersection_size	intersections	adjusted_p_value	negative_log10_of_adjusted_p_value	intersection_size	intersections
GO:MF	RNA binding	GO:0003723	7.13641e-22	21.1465	55	AIMP1,RPS8,SNRPD1,RBM3,RPL34,FUS,RPL18A,RPS6,RPL7A,HNRNPUL1,ALYREF,SF3B2,YBX1,CPSF6,ZC3H13,MOV10,CCDC47,NUDT21,AKAP8L,RPL11,TRA2B,SNRPN,RPS27L,SRSF12,YBX3,YWHAZ,CCT4,SRSF6,TXN,NUFIP2,MAP4,RPS27A,DSP,PPIA,RBMX,HNRNPAB,HNRNPA3,HNRNPD,HSPA8,DDX31,RPL13,ILF2,RPL24,SNRPD3,TUFM,RPL23A,RPS20,HSPA1B,MFAP1,RBM14,RPS9,HNRNPF,RSL1D1,BTF3,TRIM21	1.94853e-09	8.71029	25	AIMP1,RPS8,SNRPD1,RBM3,RPL34,FUS,RPL18A,RPS6,RPL7A,HNRNPUL1,ALYREF,SF3B2,YBX1,CPSF6,YWHAZ,CCT4,SRSF6,TXN,NUFIP2,MAP4,RPS27A,DSP,PPIA,RBMX,BTF3
GO:MF	structural molecule activity	GO:0005198	4.50675e-12	11.3461	27	RPS8,RPL34,RPL18A,RPS6,RPL7A,LMNA,NUP205,FBLN2,RPL11,RPS27L,TUBB,CCDC6,MAP4,MYH11,RPS27A,DSP,JUP,TPM1,TPM4,MYL1,MYL6,RPL13,CYR61,RPL24,RPL23A,RPS20,RPS9	1.47999e-07	6.82974	15	RPS8,RPL34,RPL18A,RPS6,RPL7A,LMNA,MAP4,MYH11,RPS27A,DSP,JUP,TPM1,TPM4,MYL1,MYL6
GO:MF	nucleic acid binding	GO:0003676	6.07745e-09	8.21628	59	AIMP1,RPS8,SNRPD1,RBM3,RPL34,PDX1,FUS,RPL18A,RPS6,RPL7A,HNRNPUL1,ALYREF,SF3B2,YBX1,CPSF6,ZC3H13,MOV10,CCDC47,NUDT21,AKAP8L,RPL11,TRA2B,SNRPN,RPS27L,SRSF12,CGGBP1,YBX3,DDB1,YWHAZ,CCT4,SRSF6,TXN,HMGN1,NUFIP2,MAP4,RPS27A,DSP,PPIA,RBMX,HNRNPAB,HNRNPA3,HNRNPD,HSPA8,DDX31,RPL13,ILF2,RPL24,SNRPD3,TUFM,RPL23A,RPS20,HSPA1B,MFAP1,RBM14,RPS9,HNRNPF,RSL1D1,BTF3,TRIM21	0.00121205	2.91648	27	AIMP1,RPS8,SNRPD1,RBM3,RPL34,PDX1,FUS,RPL18A,RPS6,RPL7A,HNRNPUL1,ALYREF,SF3B2,YBX1,CPSF6,YWHAZ,CCT4,SRSF6,TXN,HMGN1,NUFIP2,MAP4,RPS27A,DSP,PPIA,RBMX,BTF3
GO:MF	cadherin binding	GO:0045296	8.65272e-09	8.06285	17	CHMP4B,PDLIM5,RPL34,CHMP5,RPL7A,CALD1,CGN,TJP2,TJP1,YWHAZ,JUP,DBN1,PCMT1,HSPA8,RPL24,RPL23A,RSL1D1	8.68777e-06	5.06109	10	CHMP4B,PDLIM5,RPL34,CHMP5,RPL7A,CALD1,CGN,YWHAZ,JUP,DBN1
GO:MF	structural constituent of ribosome	GO:0003735	1.75498e-08	7.75573	13	RPS8,RPL34,RPL18A,RPS6,RPL7A,RPL11,RPS27L,RPS27A,RPL13,RPL24,RPL23A,RPS20,RPS9	0.00316617	2.49947	6	RPS8,RPL34,RPL18A,RPS6,RPL7A,RPS27A
GO:MF	cell adhesion molecule binding	GO:0050839	4.64003e-08	7.33348	20	CHMP4B,PDLIM5,RPL34,CHMP5,RPL7A,CALD1,CGN,TJP2,TJP1,YWHAZ,DSP,JUP,DBN1,PPIA,PCMT1,HSPA8,CYR61,RPL24,RPL23A,RSL1D1	8.53425e-06	5.06883	12	CHMP4B,PDLIM5,RPL34,CHMP5,RPL7A,CALD1,CGN,YWHAZ,DSP,JUP,DBN1,PPIA
GO:MF	heterocyclic compound binding	GO:1901363	8.43901e-06	5.07371	67	AIMP1,RPS8,SNRPD1,RBM3,RPL34,PDX1,FUS,RPL18A,RPS6,GAPDH,RPL7A,HNRNPUL1,ALYREF,SF3B2,YBX1,CPSF6,ZC3H13,MOV10,RIPK2,CCDC47,NUDT21,AKAP8L,RPL11,TRA2B,SNRPN,RPS27L,TUBB,SRSF12,CGGBP1,YBX3,CBS,DDB1,YWHAZ,CCT4,SRSF6,TXN,DNAH8,HMGN1,NUFIP2,MAP4,MYH11,RPS27A,DSP,PPIA,RBMX,HNRNPAB,PDE4D,HNRNPA3,HNRNPD,HSPA8,DDX31,RPL13,CYR61,ILF2,RPL24,SNRPD3,TUFM,RPL23A,RPS20,HSPA1B,MFAP1,RBM14,RPS9,HNRNPF,RSL1D1,BTF3,TR…	N/A	N/A	N/A	N/A
GO:MF	organic cyclic compound binding	GO:0097159	1.50095e-05	4.82363	67	AIMP1,RPS8,SNRPD1,RBM3,RPL34,PDX1,FUS,RPL18A,RPS6,GAPDH,RPL7A,HNRNPUL1,ALYREF,SF3B2,YBX1,CPSF6,ZC3H13,MOV10,RIPK2,CCDC47,NUDT21,AKAP8L,RPL11,TRA2B,SNRPN,RPS27L,TUBB,SRSF12,CGGBP1,YBX3,CBS,DDB1,YWHAZ,CCT4,SRSF6,TXN,DNAH8,HMGN1,NUFIP2,MAP4,MYH11,RPS27A,DSP,PPIA,RBMX,HNRNPAB,PDE4D,HNRNPA3,HNRNPD,HSPA8,DDX31,RPL13,CYR61,ILF2,RPL24,SNRPD3,TUFM,RPL23A,RPS20,HSPA1B,MFAP1,RBM14,RPS9,HNRNPF,RSL1D1,BTF3,TR…	N/A	N/A	N/A	N/A
GO:MF	protein binding	GO:0005515	3.70331e-05	4.43141	110	AKAP2,AIMP1,CHMP4B,RPS8,ANKRD50,DENND1A,SNRPD1,RBM3,PDLIM5,RPL34,PDX1,FUS,RPL18A,RPS6,CHMP5,GAPDH,RPL7A,HNRNPUL1,CALD1,CGN,KPRP,SF3B2,LMNA,YBX1,IFT20,CPSF6,SAPS3,TMX3,NUP205,ZC3H13,TACC3,WTAP,INF2,MOV10,SPAG9,RIPK2,FBLN2,TAX1BP1,CCDC47,PEX5,ADSL,TJP2,TBC1D4,TJP1,CGNL1,PGAM5,NUDT21,AKAP8L,GJA1,RPL11,TRA2B,PDE4C,SNRPN,RPS27L,TUBB,SRSF12,CGGBP1,YBX3,CCDC6,CBS,AIMP2,DDB1,YWHAZ,CCT4,SRSF6,TXN,PCM1,DNA…	N/A	N/A	N/A	N/A
GO:MF	enzyme binding	GO:0019899	0.00053019	3.27557	31	AIMP1,DENND1A,PDLIM5,RPS6,HNRNPUL1,YBX1,IFT20,SAPS3,INF2,SPAG9,RIPK2,TAX1BP1,PEX5,TJP2,NUDT21,AKAP8L,RPL11,TUBB,YBX3,CBS,YWHAZ,TPI1,RPS27A,DSP,JUP,PDE4D,HNRNPD,HSPA8,SNRPD3,HSPA1B,TRIM21	N/A	N/A	N/A	N/A
GO:MF	structural constituent of muscle	GO:0008307	0.00279348	2.55385	5	MYH11,TPM1,TPM4,MYL1,MYL6	5.06553e-05	4.29538	5	MYH11,TPM1,TPM4,MYL1,MYL6
GO:MF	mRNA binding	GO:0003729	0.0031376	2.5034	14	RBM3,FUS,YBX1,CPSF6,NUDT21,TRA2B,YBX3,SRSF6,RBMX,HNRNPAB,HNRNPA3,HNRNPD,RBM14,RSL1D1	N/A	N/A	N/A	N/A
GO:MF	protein domain specific binding	GO:0019904	0.0115171	1.93866	15	DENND1A,GAPDH,RIPK2,TJP2,TJP1,GJA1,TRA2B,TUBB,SRSF12,CCDC6,DDB1,YWHAZ,RBMX,HSPA8,HSPA1B	N/A	N/A	N/A	N/A
GO:MF	protein-containing complex binding	GO:0044877	0.0165473	1.78127	21	SNRPD1,RBM3,PDX1,CPSF6,CCDC47,PGAM5,TUBB,YBX3,DDB1,HMGN1,MYH11,JUP,TPM1,TPM4,TPM3,DBN1,PPIA,CFL1,HSPA8,CYR61,RPL23A	N/A	N/A	N/A	N/A
GO:MF	protein folding chaperone	GO:0044183	0.0300307	1.52244	4	CCDC47,CCT4,HSPA8,HSPA1B	N/A	N/A	N/A	N/A
GO:MF	actin binding	GO:0003779	N/A	N/A	N/A	N/A	0.0123536	1.9082	8	PDLIM5,CALD1,CGN,MYH11,TPM1,TPM4,TPM3,DBN1
GO:MF	cytoskeletal protein binding	GO:0008092	N/A	N/A	N/A	N/A	0.0299788	1.52319	11	PDLIM5,FUS,GAPDH,CALD1,CGN,MAP4,MYH11,TPM1,TPM4,TPM3,DBN1
GO:MF	cell adhesive protein binding involved in bundle of His cell-Purkinje myocyte communication	GO:0086083	N/A	N/A	N/A	N/A	0.0333518	1.47688	2	DSP,JUP

## Sheet: Figure S2
			ZO-1 interactors					VEGF-regulated interactors
source	term_name	term_id	adjusted_p_value	negative_log10_of_adjusted_p_value	term_size	intersection_size	intersections	adjusted_p_value	negative_log10_of_adjusted_p_value	term_size	intersection_size	intersections
GO:BP	mRNA metabolic process	GO:0016071	4.41259e-21	20.3553	880	40	RPS8,SNRPD1,RBM3,RPL34,FUS,RPL18A,RPS6,RPL7A,HNRNPUL1,SF3B2,YBX1,CPSF6,ZC3H13,WTAP,MOV10,NUDT21,AKAP8L,RPL11,TRA2B,SNRPN,SRSF12,YBX3,YWHAZ,SRSF6,RPS27A,RBMX,HNRNPA3,HNRNPD,HSPA8,CBLL1,RPL13,RPL24,SNRPD3,RPL23A,RPS20,HSPA1B,MFAP1,RBM14,RPS9,HNRNPF	1.40428e-06	5.85255	880	16	RPS8,SNRPD1,RBM3,RPL34,FUS,RPL18A,RPS6,RPL7A,HNRNPUL1,SF3B2,YBX1,CPSF6,YWHAZ,SRSF6,RPS27A,RBMX
GO:BP	RNA processing	GO:0006396	2.93565e-13	12.5323	1010	34	RPS8,SNRPD1,RBM3,RPL34,FUS,RPL18A,RPS6,RPL7A,HNRNPUL1,SF3B2,YBX1,CPSF6,ZC3H13,WTAP,NUDT21,AKAP8L,RPL11,TRA2B,SNRPN,SRSF12,SRSF6,RBMX,HNRNPA3,HNRNPD,HSPA8,RPL13,RPL24,SNRPD3,RPL23A,MFAP1,RBM14,RPS9,HNRNPF,RSL1D1	0.000625229	3.20396	1010	14	RPS8,SNRPD1,RBM3,RPL34,FUS,RPL18A,RPS6,RPL7A,HNRNPUL1,SF3B2,YBX1,CPSF6,SRSF6,RBMX
GO:BP	RNA splicing, via transesterification reactions with bulged adenosine as nucleophile	GO:0000377	1.42633e-10	9.84578	360	20	SNRPD1,RBM3,FUS,HNRNPUL1,SF3B2,YBX1,WTAP,NUDT21,TRA2B,SNRPN,SRSF12,SRSF6,RBMX,HNRNPA3,HNRNPD,HSPA8,SNRPD3,MFAP1,RBM14,HNRNPF	0.0112932	1.94718	360	8	SNRPD1,RBM3,FUS,HNRNPUL1,SF3B2,YBX1,SRSF6,RBMX
GO:BP	mRNA splicing, via spliceosome	GO:0000398	1.42633e-10	9.84578	360	20	SNRPD1,RBM3,FUS,HNRNPUL1,SF3B2,YBX1,WTAP,NUDT21,TRA2B,SNRPN,SRSF12,SRSF6,RBMX,HNRNPA3,HNRNPD,HSPA8,SNRPD3,MFAP1,RBM14,HNRNPF	0.0112932	1.94718	360	8	SNRPD1,RBM3,FUS,HNRNPUL1,SF3B2,YBX1,SRSF6,RBMX
GO:BP	RNA splicing	GO:0008380	1.43659e-10	9.84267	459	22	SNRPD1,RBM3,FUS,HNRNPUL1,SF3B2,YBX1,ZC3H13,WTAP,NUDT21,AKAP8L,TRA2B,SNRPN,SRSF12,SRSF6,RBMX,HNRNPA3,HNRNPD,HSPA8,SNRPD3,MFAP1,RBM14,HNRNPF	N/A	N/A	N/A	N/A	N/A
GO:BP	RNA splicing, via transesterification reactions	GO:0000375	1.66643e-10	9.77821	363	20	SNRPD1,RBM3,FUS,HNRNPUL1,SF3B2,YBX1,WTAP,NUDT21,TRA2B,SNRPN,SRSF12,SRSF6,RBMX,HNRNPA3,HNRNPD,HSPA8,SNRPD3,MFAP1,RBM14,HNRNPF	0.012003	1.92071	363	8	SNRPD1,RBM3,FUS,HNRNPUL1,SF3B2,YBX1,SRSF6,RBMX
GO:BP	mRNA processing	GO:0006397	3.17141e-10	9.49875	532	23	SNRPD1,RBM3,FUS,HNRNPUL1,SF3B2,YBX1,CPSF6,ZC3H13,WTAP,NUDT21,AKAP8L,TRA2B,SNRPN,SRSF12,SRSF6,RBMX,HNRNPA3,HNRNPD,HSPA8,SNRPD3,MFAP1,RBM14,HNRNPF	0.0247988	1.60557	532	9	SNRPD1,RBM3,FUS,HNRNPUL1,SF3B2,YBX1,CPSF6,SRSF6,RBMX
GO:BP	protein targeting to ER	GO:0045047	3.41796e-10	9.46623	111	13	CHMP4B,RPS8,RPL34,RPL18A,RPS6,RPL7A,RPL11,RPS27A,RPL13,RPL24,RPL23A,RPS20,RPS9	4.2178e-05	4.37491	111	7	CHMP4B,RPS8,RPL34,RPL18A,RPS6,RPL7A,RPS27A
GO:BP	protein localization to endoplasmic reticulum	GO:0070972	5.26236e-10	9.27882	144	14	CHMP4B,RPS8,RPL34,RPL18A,RPS6,RPL7A,GJA1,RPL11,RPS27A,RPL13,RPL24,RPL23A,RPS20,RPS9	0.0002551	3.59329	144	7	CHMP4B,RPS8,RPL34,RPL18A,RPS6,RPL7A,RPS27A
GO:BP	establishment of protein localization to endoplasmic reticulum	GO:0072599	5.44701e-10	9.26384	115	13	CHMP4B,RPS8,RPL34,RPL18A,RPS6,RPL7A,RPL11,RPS27A,RPL13,RPL24,RPL23A,RPS20,RPS9	5.39696e-05	4.26785	115	7	CHMP4B,RPS8,RPL34,RPL18A,RPS6,RPL7A,RPS27A
GO:BP	mRNA catabolic process	GO:0006402	5.77347e-10	9.23856	388	20	RPS8,RPL34,FUS,RPL18A,RPS6,RPL7A,YBX1,MOV10,RPL11,YBX3,YWHAZ,RPS27A,HNRNPD,HSPA8,RPL13,RPL24,RPL23A,RPS20,HSPA1B,RPS9	0.00188657	2.72433	388	9	RPS8,RPL34,FUS,RPL18A,RPS6,RPL7A,YBX1,YWHAZ,RPS27A
GO:BP	SRP-dependent cotranslational protein targeting to membrane	GO:0006614	1.36792e-09	8.86394	96	12	RPS8,RPL34,RPL18A,RPS6,RPL7A,RPL11,RPS27A,RPL13,RPL24,RPL23A,RPS20,RPS9	0.00049885	3.30203	96	6	RPS8,RPL34,RPL18A,RPS6,RPL7A,RPS27A
GO:BP	cotranslational protein targeting to membrane	GO:0006613	2.86809e-09	8.54241	102	12	RPS8,RPL34,RPL18A,RPS6,RPL7A,RPL11,RPS27A,RPL13,RPL24,RPL23A,RPS20,RPS9	0.000715782	3.14522	102	6	RPS8,RPL34,RPL18A,RPS6,RPL7A,RPS27A
GO:BP	RNA catabolic process	GO:0006401	4.01061e-09	8.39679	431	20	RPS8,RPL34,FUS,RPL18A,RPS6,RPL7A,YBX1,MOV10,RPL11,YBX3,YWHAZ,RPS27A,HNRNPD,HSPA8,RPL13,RPL24,RPL23A,RPS20,HSPA1B,RPS9	0.00449761	2.34702	431	9	RPS8,RPL34,FUS,RPL18A,RPS6,RPL7A,YBX1,YWHAZ,RPS27A
GO:BP	nucleobase-containing compound catabolic process	GO:0034655	1.19623e-08	7.92218	573	22	RPS8,RPL34,FUS,RPL18A,RPS6,RPL7A,YBX1,MOV10,RPL11,PDE4C,YBX3,YWHAZ,RPS27A,PDE4D,HNRNPD,HSPA8,RPL13,RPL24,RPL23A,RPS20,HSPA1B,RPS9	0.0447487	1.34922	573	9	RPS8,RPL34,FUS,RPL18A,RPS6,RPL7A,YBX1,YWHAZ,RPS27A
GO:BP	viral transcription	GO:0019083	1.22612e-08	7.91147	181	14	RPS8,RPL34,RPL18A,RPS6,RPL7A,NUP205,RPL11,RPS27A,RPL13,RPL24,RPL23A,RPS20,RPS9,TRIM21	0.0203248	1.69197	181	6	RPS8,RPL34,RPL18A,RPS6,RPL7A,RPS27A
GO:BP	cytoplasmic translation	GO:0002181	1.56407e-08	7.80574	149	13	RPS8,RPL34,RPL18A,RPS6,RPL7A,RPL11,YBX3,RPS27A,RPL13,RPL24,RPL23A,RPS20,RPS9	0.00662956	2.17852	149	6	RPS8,RPL34,RPL18A,RPS6,RPL7A,RPS27A
GO:BP	nuclear-transcribed mRNA catabolic process, nonsense-mediated decay	GO:0000184	2.73934e-08	7.56235	123	12	RPS8,RPL34,RPL18A,RPS6,RPL7A,RPL11,RPS27A,RPL13,RPL24,RPL23A,RPS20,RPS9	0.00216424	2.6647	123	6	RPS8,RPL34,RPL18A,RPS6,RPL7A,RPS27A
GO:BP	heterocycle catabolic process	GO:0046700	5.04751e-08	7.29692	617	22	RPS8,RPL34,FUS,RPL18A,RPS6,RPL7A,YBX1,MOV10,RPL11,PDE4C,YBX3,YWHAZ,RPS27A,PDE4D,HNRNPD,HSPA8,RPL13,RPL24,RPL23A,RPS20,HSPA1B,RPS9	N/A	N/A	N/A	N/A	N/A
GO:BP	cellular nitrogen compound catabolic process	GO:0044270	6.08495e-08	7.21574	623	22	RPS8,RPL34,FUS,RPL18A,RPS6,RPL7A,YBX1,MOV10,RPL11,PDE4C,YBX3,YWHAZ,RPS27A,PDE4D,HNRNPD,HSPA8,RPL13,RPL24,RPL23A,RPS20,HSPA1B,RPS9	N/A	N/A	N/A	N/A	N/A
GO:BP	nucleobase-containing compound metabolic process	GO:0006139	6.28788e-08	7.2015	5752	70	AIMP1,RPS8,SNRPD1,RBM3,RPL34,PDX1,FUS,RPL18A,RPS6,GAPDH,RPL7A,HNRNPUL1,SF3B2,LMNA,YBX1,CPSF6,SAPS3,NUP205,ZC3H13,WTAP,MOV10,RIPK2,TAX1BP1,ADSL,TJP2,NUDT21,AKAP8L,GJA1,RPL11,TRA2B,PDE4C,SNRPN,SRSF12,CGGBP1,YBX3,CBS,AIMP2,DDB1,YWHAZ,CCT4,SRSF6,TXN,HMGN1,TPI1,RPS27A,JUP,PPIA,RBMX,HNRNPAB,PDE4D,HNRNPA3,HNRNPD,HSPA8,CBLL1,DLAT,RPL13,CYR61,ILF2,RPL24,SNRPD3,RPL23A,RPS20,HSPA1B,MFAP1,RBM14,RPS9,HNRNPF,R…	N/A	N/A	N/A	N/A	N/A
GO:BP	aromatic compound catabolic process	GO:0019439	9.05757e-08	7.04299	636	22	RPS8,RPL34,FUS,RPL18A,RPS6,RPL7A,YBX1,MOV10,RPL11,PDE4C,YBX3,YWHAZ,RPS27A,PDE4D,HNRNPD,HSPA8,RPL13,RPL24,RPL23A,RPS20,HSPA1B,RPS9	N/A	N/A	N/A	N/A	N/A
GO:BP	establishment of protein localization to organelle	GO:0072594	1.31434e-07	6.88129	523	20	CHMP4B,RPS8,RPL34,RPL18A,RPS6,RPL7A,LMNA,PEX5,RPL11,YWHAZ,CCT4,RPS27A,JUP,HSPA8,RPL13,RPL24,RPL23A,RPS20,RPS9,SLC25A6	0.00025538	3.59281	523	11	CHMP4B,RPS8,RPL34,RPL18A,RPS6,RPL7A,LMNA,YWHAZ,CCT4,RPS27A,JUP
GO:BP	protein targeting to membrane	GO:0006612	1.59256e-07	6.7979	219	14	CHMP4B,RPS8,RPL34,RPL18A,RPS6,RPL7A,PEX5,RPL11,RPS27A,RPL13,RPL24,RPL23A,RPS20,RPS9	0.00433719	2.36279	219	7	CHMP4B,RPS8,RPL34,RPL18A,RPS6,RPL7A,RPS27A
GO:BP	ribonucleoprotein complex biogenesis	GO:0022613	1.80366e-07	6.74385	473	19	RPS8,SNRPD1,RPL34,RPL18A,RPS6,RPL7A,CPSF6,NUDT21,RPL11,RPS27L,SRSF12,SRSF6,DDX31,RPL13,RPL24,SNRPD3,RPL23A,RPS9,RSL1D1	N/A	N/A	N/A	N/A	N/A
GO:BP	organic cyclic compound catabolic process	GO:1901361	2.06653e-07	6.68476	664	22	RPS8,RPL34,FUS,RPL18A,RPS6,RPL7A,YBX1,MOV10,RPL11,PDE4C,YBX3,YWHAZ,RPS27A,PDE4D,HNRNPD,HSPA8,RPL13,RPL24,RPL23A,RPS20,HSPA1B,RPS9	N/A	N/A	N/A	N/A	N/A
GO:BP	intracellular transport	GO:0046907	2.57048e-07	6.58999	1723	35	CHMP4B,RPS8,ANKRD50,DENND1A,SNRPD1,RPL34,RPL18A,RPS6,CHMP5,RPL7A,LMNA,IFT20,CPSF6,SAPS3,NUP205,SPAG9,PEX5,TBC1D4,AKAP8L,RPL11,TUBB,YWHAZ,SRSF6,TXN,PCM1,RPS27A,JUP,HSPA8,RPL13,RPL24,SNRPD3,RPL23A,RPS20,RPS9,SLC25A6	1.40181e-05	4.85331	1723	20	CHMP4B,RPS8,ANKRD50,DENND1A,SNRPD1,RPL34,RPL18A,RPS6,CHMP5,RPL7A,LMNA,IFT20,CPSF6,SAPS3,YWHAZ,SRSF6,TXN,PCM1,RPS27A,JUP
GO:BP	heterocycle metabolic process	GO:0046483	2.90619e-07	6.53668	5929	70	AIMP1,RPS8,SNRPD1,RBM3,RPL34,PDX1,FUS,RPL18A,RPS6,GAPDH,RPL7A,HNRNPUL1,SF3B2,LMNA,YBX1,CPSF6,SAPS3,NUP205,ZC3H13,WTAP,MOV10,RIPK2,TAX1BP1,ADSL,TJP2,NUDT21,AKAP8L,GJA1,RPL11,TRA2B,PDE4C,SNRPN,SRSF12,CGGBP1,YBX3,CBS,AIMP2,DDB1,YWHAZ,CCT4,SRSF6,TXN,HMGN1,TPI1,RPS27A,JUP,PPIA,RBMX,HNRNPAB,PDE4D,HNRNPA3,HNRNPD,HSPA8,CBLL1,DLAT,RPL13,CYR61,ILF2,RPL24,SNRPD3,RPL23A,RPS20,HSPA1B,MFAP1,RBM14,RPS9,HNRNPF,R…	N/A	N/A	N/A	N/A	N/A
GO:BP	protein localization to organelle	GO:0033365	3.69657e-07	6.4322	974	26	CHMP4B,RPS8,RPL34,RPL18A,RPS6,RPL7A,LMNA,YBX1,IFT20,CCDC47,PEX5,GJA1,RPL11,YWHAZ,CCT4,TXN,PCM1,RPS27A,JUP,HSPA8,RPL13,RPL24,RPL23A,RPS20,RPS9,SLC25A6	5.18254e-05	4.28546	974	15	CHMP4B,RPS8,RPL34,RPL18A,RPS6,RPL7A,LMNA,YBX1,IFT20,YWHAZ,CCT4,TXN,PCM1,RPS27A,JUP
GO:BP	cellular aromatic compound metabolic process	GO:0006725	4.2045e-07	6.37629	5973	70	AIMP1,RPS8,SNRPD1,RBM3,RPL34,PDX1,FUS,RPL18A,RPS6,GAPDH,RPL7A,HNRNPUL1,SF3B2,LMNA,YBX1,CPSF6,SAPS3,NUP205,ZC3H13,WTAP,MOV10,RIPK2,TAX1BP1,ADSL,TJP2,NUDT21,AKAP8L,GJA1,RPL11,TRA2B,PDE4C,SNRPN,SRSF12,CGGBP1,YBX3,CBS,AIMP2,DDB1,YWHAZ,CCT4,SRSF6,TXN,HMGN1,TPI1,RPS27A,JUP,PPIA,RBMX,HNRNPAB,PDE4D,HNRNPA3,HNRNPD,HSPA8,CBLL1,DLAT,RPL13,CYR61,ILF2,RPL24,SNRPD3,RPL23A,RPS20,HSPA1B,MFAP1,RBM14,RPS9,HNRNPF,R…	N/A	N/A	N/A	N/A	N/A
GO:BP	establishment of localization in cell	GO:0051649	4.21714e-07	6.37498	2778	45	CHMP4B,RPS8,ANKRD50,DENND1A,SNRPD1,RPL34,PDX1,RPL18A,RPS6,CHMP5,RPL7A,LMNA,IFT20,CPSF6,SAPS3,TMX3,NUP205,SPAG9,PEX5,TBC1D4,AKAP8L,GJA1,RPL11,TUBB,YWHAZ,SRSF6,TXN,PCM1,MAP4,RPS27A,DSP,JUP,PPIA,PDE4D,CFL1,HSPA8,RPL13,ILF2,RPL24,SNRPD3,RPL23A,RPS20,HSPA1B,RPS9,SLC25A6	7.30705e-05	4.13626	2778	24	CHMP4B,RPS8,ANKRD50,DENND1A,SNRPD1,RPL34,PDX1,RPL18A,RPS6,CHMP5,RPL7A,LMNA,IFT20,CPSF6,SAPS3,YWHAZ,SRSF6,TXN,PCM1,MAP4,RPS27A,DSP,JUP,PPIA
GO:BP	viral gene expression	GO:0019080	4.53322e-07	6.34359	237	14	RPS8,RPL34,RPL18A,RPS6,RPL7A,NUP205,RPL11,RPS27A,RPL13,RPL24,RPL23A,RPS20,RPS9,TRIM21	N/A	N/A	N/A	N/A	N/A
GO:BP	protein targeting	GO:0006605	8.14335e-07	6.0892	400	17	CHMP4B,RPS8,RPL34,RPL18A,RPS6,RPL7A,PEX5,RPL11,YWHAZ,RPS27A,HSPA8,RPL13,RPL24,RPL23A,RPS20,RPS9,SLC25A6	0.0243795	1.61297	400	8	CHMP4B,RPS8,RPL34,RPL18A,RPS6,RPL7A,YWHAZ,RPS27A
GO:BP	viral process	GO:0016032	8.24536e-07	6.08379	1011	26	CHMP4B,RPS8,RPL34,RPL18A,RPS6,CHMP5,RPL7A,SF3B2,NUP205,MOV10,AKAP8L,RPL11,DDB1,RPS27A,PPIA,CFL1,HSPA8,RPL13,RPL24,TUFM,RPL23A,RPS20,HSPA1B,RPS9,SLC25A6,TRIM21	N/A	N/A	N/A	N/A	N/A
GO:BP	cellular component biogenesis	GO:0044085	2.05552e-06	5.68708	3377	49	CHMP4B,RPS8,SNRPD1,PDLIM5,RPL34,FUS,RPL18A,RPS6,CHMP5,RPL7A,CALD1,LMNA,IFT20,CPSF6,SAPS3,NUP205,PEX5,TJP1,CGNL1,NUDT21,GJA1,RPL11,RPS27L,TUBB,SRSF12,AIMP2,DDB1,YWHAZ,SRSF6,PCM1,DNAH8,MAP4,MYH11,RPS27A,JUP,TPM1,DBN1,RBMX,HSPA8,DDX31,RPL13,CYR61,RPL24,SNRPD3,RPL23A,HSPA1B,RBM14,RPS9,RSL1D1	0.000144937	3.83882	3377	26	CHMP4B,RPS8,SNRPD1,PDLIM5,RPL34,FUS,RPL18A,RPS6,CHMP5,RPL7A,CALD1,LMNA,IFT20,CPSF6,SAPS3,YWHAZ,SRSF6,PCM1,DNAH8,MAP4,MYH11,RPS27A,JUP,TPM1,DBN1,RBMX
GO:BP	organic cyclic compound metabolic process	GO:1901360	3.26058e-06	5.48671	6227	70	AIMP1,RPS8,SNRPD1,RBM3,RPL34,PDX1,FUS,RPL18A,RPS6,GAPDH,RPL7A,HNRNPUL1,SF3B2,LMNA,YBX1,CPSF6,SAPS3,NUP205,ZC3H13,WTAP,MOV10,RIPK2,TAX1BP1,ADSL,TJP2,NUDT21,AKAP8L,GJA1,RPL11,TRA2B,PDE4C,SNRPN,SRSF12,CGGBP1,YBX3,CBS,AIMP2,DDB1,YWHAZ,CCT4,SRSF6,TXN,HMGN1,TPI1,RPS27A,JUP,PPIA,RBMX,HNRNPAB,PDE4D,HNRNPA3,HNRNPD,HSPA8,CBLL1,DLAT,RPL13,CYR61,ILF2,RPL24,SNRPD3,RPL23A,RPS20,HSPA1B,MFAP1,RBM14,RPS9,HNRNPF,R…	N/A	N/A	N/A	N/A	N/A
GO:BP	regulation of mRNA metabolic process	GO:1903311	3.68724e-06	5.4333	384	16	RBM3,FUS,YBX1,CPSF6,WTAP,MOV10,NUDT21,TRA2B,SRSF12,YBX3,YWHAZ,SRSF6,RPS27A,RBMX,HNRNPD,HSPA8	0.0181145	1.74197	384	8	RBM3,FUS,YBX1,CPSF6,YWHAZ,SRSF6,RPS27A,RBMX
GO:BP	establishment of protein localization to membrane	GO:0090150	3.82749e-06	5.41709	385	16	CHMP4B,RPS8,RPL34,RPL18A,RPS6,RPL7A,CCDC47,PEX5,RPL11,YWHAZ,RPS27A,RPL13,RPL24,RPL23A,RPS20,RPS9	0.0184613	1.73374	385	8	CHMP4B,RPS8,RPL34,RPL18A,RPS6,RPL7A,YWHAZ,RPS27A
GO:BP	cellular nitrogen compound metabolic process	GO:0034641	4.75994e-06	5.3224	6576	72	AIMP1,RPS8,SNRPD1,RBM3,RPL34,PDX1,FUS,RPL18A,RPS6,GAPDH,RPL7A,HNRNPUL1,SF3B2,LMNA,YBX1,CPSF6,SAPS3,NUP205,ZC3H13,WTAP,MOV10,RIPK2,TAX1BP1,ADSL,TJP2,NUDT21,AKAP8L,GJA1,RPL11,TRA2B,PDE4C,SNRPN,RPS27L,SRSF12,CGGBP1,YBX3,CBS,AIMP2,DDB1,YWHAZ,CCT4,SRSF6,TXN,HMGN1,TPI1,RPS27A,JUP,PPIA,RBMX,HNRNPAB,PDE4D,HNRNPA3,HNRNPD,HSPA8,CBLL1,DLAT,RPL13,CYR61,ILF2,RPL24,SNRPD3,TUFM,RPL23A,RPS20,HSPA1B,MFAP1,RBM14,R…	N/A	N/A	N/A	N/A	N/A
GO:BP	translation	GO:0006412	7.37732e-06	5.1321	804	22	AIMP1,RPS8,RBM3,RPL34,RPL18A,RPS6,GAPDH,RPL7A,YBX1,MOV10,RPL11,RPS27L,YBX3,AIMP2,RPS27A,HNRNPD,RPL13,RPL24,TUFM,RPL23A,RPS20,RPS9	N/A	N/A	N/A	N/A	N/A
GO:BP	cellular localization	GO:0051641	8.61365e-06	5.06481	3519	49	CHMP4B,RPS8,ANKRD50,DENND1A,SNRPD1,RPL34,PDX1,RPL18A,RPS6,CHMP5,RPL7A,LMNA,YBX1,IFT20,CPSF6,SAPS3,TMX3,NUP205,SPAG9,CCDC47,PEX5,TBC1D4,AKAP8L,GJA1,RPL11,TUBB,YWHAZ,CCT4,SRSF6,TXN,PCM1,MAP4,RPS27A,DSP,JUP,DBN1,PPIA,PDE4D,CFL1,HSPA8,RPL13,ILF2,RPL24,SNRPD3,RPL23A,RPS20,HSPA1B,RPS9,SLC25A6	6.88688e-05	4.16198	3519	27	CHMP4B,RPS8,ANKRD50,DENND1A,SNRPD1,RPL34,PDX1,RPL18A,RPS6,CHMP5,RPL7A,LMNA,YBX1,IFT20,CPSF6,SAPS3,YWHAZ,CCT4,SRSF6,TXN,PCM1,MAP4,RPS27A,DSP,JUP,DBN1,PPIA
GO:BP	translational initiation	GO:0006413	9.23924e-06	5.03436	203	12	RPS8,RPL34,RPL18A,RPS6,RPL7A,RPL11,RPS27A,RPL13,RPL24,RPL23A,RPS20,RPS9	0.0390335	1.40856	203	6	RPS8,RPL34,RPL18A,RPS6,RPL7A,RPS27A
GO:BP	amide biosynthetic process	GO:0043604	1.034e-05	4.98548	975	24	AIMP1,RPS8,RBM3,RPL34,RPL18A,RPS6,GAPDH,RPL7A,YBX1,MOV10,RPL11,RPS27L,YBX3,AIMP2,RPS27A,HNRNPD,DLAT,RPL13,CYR61,RPL24,TUFM,RPL23A,RPS20,RPS9	N/A	N/A	N/A	N/A	N/A
GO:BP	nucleic acid metabolic process	GO:0090304	1.09684e-05	4.95986	5234	62	AIMP1,RPS8,SNRPD1,RBM3,RPL34,PDX1,FUS,RPL18A,RPS6,RPL7A,HNRNPUL1,SF3B2,LMNA,YBX1,CPSF6,SAPS3,ZC3H13,WTAP,MOV10,RIPK2,TAX1BP1,NUDT21,AKAP8L,GJA1,RPL11,TRA2B,SNRPN,SRSF12,CGGBP1,YBX3,CBS,AIMP2,DDB1,YWHAZ,CCT4,SRSF6,TXN,HMGN1,RPS27A,JUP,PPIA,RBMX,HNRNPAB,HNRNPA3,HNRNPD,HSPA8,CBLL1,RPL13,CYR61,ILF2,RPL24,SNRPD3,RPL23A,RPS20,HSPA1B,MFAP1,RBM14,RPS9,HNRNPF,RSL1D1,BTF3,TRIM21	N/A	N/A	N/A	N/A	N/A
GO:BP	peptide biosynthetic process	GO:0043043	1.43722e-05	4.84248	834	22	AIMP1,RPS8,RBM3,RPL34,RPL18A,RPS6,GAPDH,RPL7A,YBX1,MOV10,RPL11,RPS27L,YBX3,AIMP2,RPS27A,HNRNPD,RPL13,RPL24,TUFM,RPL23A,RPS20,RPS9	N/A	N/A	N/A	N/A	N/A
GO:BP	nitrogen compound transport	GO:0071705	1.56052e-05	4.80673	2216	37	AIMP1,CHMP4B,RPS8,ANKRD50,DENND1A,RPL34,PDX1,RPL18A,RPS6,CHMP5,RPL7A,LMNA,YBX1,IFT20,CPSF6,NUP205,PEX5,TBC1D4,AKAP8L,GJA1,RPL11,YWHAZ,SRSF6,TXN,PCM1,RPS27A,JUP,PPIA,HNRNPA3,HSPA8,RPL13,RPL24,RPL23A,RPS20,RPS9,SLC25A6,BTF3	4.98443e-06	5.30238	2216	23	AIMP1,CHMP4B,RPS8,ANKRD50,DENND1A,RPL34,PDX1,RPL18A,RPS6,CHMP5,RPL7A,LMNA,YBX1,IFT20,CPSF6,YWHAZ,SRSF6,TXN,PCM1,RPS27A,JUP,PPIA,BTF3
GO:BP	protein localization	GO:0008104	1.9894e-05	4.70128	2670	41	CHMP4B,RPS8,ANKRD50,DENND1A,RPL34,PDX1,RPL18A,RPS6,CHMP5,RPL7A,LMNA,YBX1,IFT20,NUP205,CCDC47,PEX5,TJP2,TBC1D4,TJP1,CGNL1,GJA1,RPL11,YWHAZ,CCT4,TXN,PCM1,RPS27A,DSP,JUP,DBN1,PPIA,HSPA8,RPL13,RPL24,RPL23A,RPS20,RPS9,SLC25A6,RSL1D1,BTF3,TRIM21	0.000181471	3.74119	2670	23	CHMP4B,RPS8,ANKRD50,DENND1A,RPL34,PDX1,RPL18A,RPS6,CHMP5,RPL7A,LMNA,YBX1,IFT20,YWHAZ,CCT4,TXN,PCM1,RPS27A,DSP,JUP,DBN1,PPIA,BTF3
GO:BP	macromolecule localization	GO:0033036	2.45441e-05	4.61005	3148	45	CHMP4B,RPS8,ANKRD50,DENND1A,RPL34,PDX1,RPL18A,RPS6,CHMP5,RPL7A,LMNA,YBX1,IFT20,CPSF6,NUP205,CCDC47,PEX5,TJP2,TBC1D4,TJP1,CGNL1,AKAP8L,GJA1,RPL11,YWHAZ,CCT4,SRSF6,TXN,PCM1,RPS27A,DSP,JUP,DBN1,PPIA,HNRNPA3,HSPA8,RPL13,RPL24,RPL23A,RPS20,RPS9,SLC25A6,RSL1D1,BTF3,TRIM21	0.000171242	3.76639	3148	25	CHMP4B,RPS8,ANKRD50,DENND1A,RPL34,PDX1,RPL18A,RPS6,CHMP5,RPL7A,LMNA,YBX1,IFT20,CPSF6,YWHAZ,CCT4,SRSF6,TXN,PCM1,RPS27A,DSP,JUP,DBN1,PPIA,BTF3
GO:BP	establishment of protein localization	GO:0045184	3.36099e-05	4.47353	1866	33	CHMP4B,RPS8,ANKRD50,DENND1A,RPL34,PDX1,RPL18A,RPS6,CHMP5,RPL7A,LMNA,IFT20,NUP205,CCDC47,PEX5,TBC1D4,GJA1,RPL11,YWHAZ,CCT4,TXN,PCM1,RPS27A,JUP,PPIA,HSPA8,RPL13,RPL24,RPL23A,RPS20,RPS9,SLC25A6,BTF3	5.485e-05	4.26082	1866	20	CHMP4B,RPS8,ANKRD50,DENND1A,RPL34,PDX1,RPL18A,RPS6,CHMP5,RPL7A,LMNA,IFT20,YWHAZ,CCT4,TXN,PCM1,RPS27A,JUP,PPIA,BTF3
GO:BP	protein transport	GO:0015031	0.000106127	3.97417	1754	31	CHMP4B,RPS8,ANKRD50,DENND1A,RPL34,PDX1,RPL18A,RPS6,CHMP5,RPL7A,LMNA,IFT20,NUP205,PEX5,TBC1D4,GJA1,RPL11,YWHAZ,TXN,PCM1,RPS27A,JUP,PPIA,HSPA8,RPL13,RPL24,RPL23A,RPS20,RPS9,SLC25A6,BTF3	0.000121388	3.91582	1754	19	CHMP4B,RPS8,ANKRD50,DENND1A,RPL34,PDX1,RPL18A,RPS6,CHMP5,RPL7A,LMNA,IFT20,YWHAZ,TXN,PCM1,RPS27A,JUP,PPIA,BTF3
GO:BP	localization within membrane	GO:0051668	0.000108812	3.96332	775	20	CHMP4B,RPS8,ANKRD50,DENND1A,RPL34,RPL18A,RPS6,RPL7A,IFT20,CCDC47,PEX5,RPL11,YWHAZ,RPS27A,JUP,RPL13,RPL24,RPL23A,RPS20,RPS9	0.00167449	2.77612	775	12	CHMP4B,RPS8,ANKRD50,DENND1A,RPL34,RPL18A,RPS6,RPL7A,IFT20,YWHAZ,RPS27A,JUP
GO:BP	RNA metabolic process	GO:0016070	0.000118082	3.92782	4714	56	AIMP1,RPS8,SNRPD1,RBM3,RPL34,PDX1,FUS,RPL18A,RPS6,RPL7A,HNRNPUL1,SF3B2,YBX1,CPSF6,ZC3H13,WTAP,MOV10,RIPK2,TAX1BP1,NUDT21,AKAP8L,RPL11,TRA2B,SNRPN,SRSF12,CGGBP1,YBX3,AIMP2,YWHAZ,SRSF6,TXN,HMGN1,RPS27A,JUP,PPIA,RBMX,HNRNPAB,HNRNPA3,HNRNPD,HSPA8,CBLL1,RPL13,CYR61,ILF2,RPL24,SNRPD3,RPL23A,RPS20,HSPA1B,MFAP1,RBM14,RPS9,HNRNPF,RSL1D1,BTF3,TRIM21	N/A	N/A	N/A	N/A	N/A
GO:BP	cellular component organization or biogenesis	GO:0071840	0.000124653	3.9043	6880	71	CHMP4B,RPS8,SNRPD1,PDLIM5,RPL34,FUS,RPL18A,RPS6,CHMP5,GAPDH,RPL7A,CALD1,LMNA,IFT20,CPSF6,SAPS3,NUP205,TACC3,INF2,MOV10,SPAG9,FBLN2,CCDC47,PEX5,TJP2,TBC1D4,TJP1,CGNL1,NUDT21,AKAP8L,GJA1,RPL11,RPS27L,TUBB,SRSF12,CCDC6,AIMP2,DDB1,YWHAZ,CCT4,SRSF6,PCM1,DNAH8,HMGN1,MAP4,MYH11,RPS27A,DSP,JUP,TPM1,TPM4,TPM3,DBN1,TACC2,PPIA,RBMX,HNRNPD,CFL1,HSPA8,DDX31,CBLL1,RPL13,CYR61,RPL24,SNRPD3,RPL23A,HSPA1B,RBM14,R…	0.0180964	1.74241	6880	34	CHMP4B,RPS8,SNRPD1,PDLIM5,RPL34,FUS,RPL18A,RPS6,CHMP5,GAPDH,RPL7A,CALD1,LMNA,IFT20,CPSF6,SAPS3,YWHAZ,CCT4,SRSF6,PCM1,DNAH8,HMGN1,MAP4,MYH11,RPS27A,DSP,JUP,TPM1,TPM4,TPM3,DBN1,TACC2,PPIA,RBMX
GO:BP	actin-mediated cell contraction	GO:0070252	0.000124854	3.9036	122	9	GJA1,DSP,JUP,TPM1,TPM4,TPM3,MYL1,MYL6,PDE4D	8.13435e-05	4.08968	122	7	DSP,JUP,TPM1,TPM4,TPM3,MYL1,MYL6
GO:BP	ribosome biogenesis	GO:0042254	0.000303805	3.51741	335	13	RPS8,RPL34,RPL18A,RPS6,RPL7A,RPL11,RPS27L,DDX31,RPL13,RPL24,RPL23A,RPS9,RSL1D1	N/A	N/A	N/A	N/A	N/A
GO:BP	intracellular protein transport	GO:0006886	0.000326418	3.48623	995	22	CHMP4B,RPS8,RPL34,RPL18A,RPS6,RPL7A,LMNA,PEX5,TBC1D4,RPL11,YWHAZ,TXN,PCM1,RPS27A,JUP,HSPA8,RPL13,RPL24,RPL23A,RPS20,RPS9,SLC25A6	0.0222756	1.65217	995	12	CHMP4B,RPS8,RPL34,RPL18A,RPS6,RPL7A,LMNA,YWHAZ,TXN,PCM1,RPS27A,JUP
GO:BP	peptide metabolic process	GO:0006518	0.000343798	3.4637	998	22	AIMP1,RPS8,RBM3,RPL34,RPL18A,RPS6,GAPDH,RPL7A,YBX1,MOV10,RPL11,RPS27L,YBX3,AIMP2,RPS27A,HNRNPD,RPL13,RPL24,TUFM,RPL23A,RPS20,RPS9	N/A	N/A	N/A	N/A	N/A
GO:BP	protein localization to membrane	GO:0072657	0.000547684	3.26147	698	18	CHMP4B,RPS8,RPL34,RPL18A,RPS6,RPL7A,IFT20,CCDC47,PEX5,RPL11,YWHAZ,RPS27A,JUP,RPL13,RPL24,RPL23A,RPS20,RPS9	0.0322398	1.49161	698	10	CHMP4B,RPS8,RPL34,RPL18A,RPS6,RPL7A,IFT20,YWHAZ,RPS27A,JUP
GO:BP	regulation of mRNA processing	GO:0050684	0.000550812	3.259	145	9	RBM3,CPSF6,WTAP,NUDT21,TRA2B,SRSF12,SRSF6,RBMX,HSPA8	N/A	N/A	N/A	N/A	N/A
GO:BP	ribonucleoprotein complex assembly	GO:0022618	0.000734411	3.13406	196	10	SNRPD1,CPSF6,NUDT21,RPL11,RPS27L,SRSF12,SRSF6,RPL24,SNRPD3,RPL23A	N/A	N/A	N/A	N/A	N/A
GO:BP	actin filament-based movement	GO:0030048	0.000777054	3.10955	151	9	GJA1,DSP,JUP,TPM1,TPM4,TPM3,MYL1,MYL6,PDE4D	0.000353062	3.45215	151	7	DSP,JUP,TPM1,TPM4,TPM3,MYL1,MYL6
GO:BP	regulation of RNA splicing	GO:0043484	0.000821695	3.08529	152	9	RBM3,FUS,WTAP,TRA2B,SRSF12,SRSF6,RBMX,HSPA8,HNRNPF	N/A	N/A	N/A	N/A	N/A
GO:BP	cellular macromolecule catabolic process	GO:0044265	0.00100245	2.99894	1244	24	CHMP4B,RPS8,RPL34,FUS,RPL18A,RPS6,RPL7A,YBX1,SAPS3,MOV10,CCDC47,RPL11,YBX3,DDB1,YWHAZ,RPS27A,HNRNPD,HSPA8,RPL13,RPL24,RPL23A,RPS20,HSPA1B,RPS9	N/A	N/A	N/A	N/A	N/A
GO:BP	ribonucleoprotein complex subunit organization	GO:0071826	0.0010142	2.99388	203	10	SNRPD1,CPSF6,NUDT21,RPL11,RPS27L,SRSF12,SRSF6,RPL24,SNRPD3,RPL23A	N/A	N/A	N/A	N/A	N/A
GO:BP	rRNA processing	GO:0006364	0.00147777	2.83039	265	11	RPS8,RPL34,RPL18A,RPS6,RPL7A,RPL11,RPL13,RPL24,RPL23A,RPS9,RSL1D1	N/A	N/A	N/A	N/A	N/A
GO:BP	negative regulation of gene expression	GO:0010629	0.00161776	2.79109	1470	26	RPS8,RPL34,FUS,RPL18A,RPS6,GAPDH,RPL7A,YBX1,NUP205,MOV10,TAX1BP1,RPL11,SRSF12,YBX3,YWHAZ,SRSF6,RPS27A,RBMX,HNRNPD,HSPA8,RPL13,RPL24,RPL23A,RPS20,HSPA1B,RPS9	N/A	N/A	N/A	N/A	N/A
GO:BP	cytoskeleton organization	GO:0007010	0.00168141	2.77433	1473	26	CHMP4B,PDLIM5,CHMP5,GAPDH,CALD1,LMNA,TACC3,INF2,TJP1,CGNL1,GJA1,TUBB,CCDC6,PCM1,DNAH8,MAP4,MYH11,DSP,TPM1,TPM4,TPM3,DBN1,TACC2,CFL1,HSPA1B,RBM14	0.00192517	2.71553	1473	16	CHMP4B,PDLIM5,CHMP5,GAPDH,CALD1,LMNA,PCM1,DNAH8,MAP4,MYH11,DSP,TPM1,TPM4,TPM3,DBN1,TACC2
GO:BP	organic substance transport	GO:0071702	0.0017396	2.75955	2657	37	AIMP1,CHMP4B,RPS8,ANKRD50,DENND1A,RPL34,PDX1,RPL18A,RPS6,CHMP5,RPL7A,LMNA,YBX1,IFT20,CPSF6,NUP205,PEX5,TBC1D4,AKAP8L,GJA1,RPL11,YWHAZ,SRSF6,TXN,PCM1,RPS27A,JUP,PPIA,HNRNPA3,HSPA8,RPL13,RPL24,RPL23A,RPS20,RPS9,SLC25A6,BTF3	0.000165504	3.78119	2657	23	AIMP1,CHMP4B,RPS8,ANKRD50,DENND1A,RPL34,PDX1,RPL18A,RPS6,CHMP5,RPL7A,LMNA,YBX1,IFT20,CPSF6,YWHAZ,SRSF6,TXN,PCM1,RPS27A,JUP,PPIA,BTF3
GO:BP	cellular amide metabolic process	GO:0043603	0.00176672	2.75283	1284	24	AIMP1,RPS8,RBM3,RPL34,RPL18A,RPS6,GAPDH,RPL7A,YBX1,MOV10,RPL11,RPS27L,YBX3,AIMP2,RPS27A,HNRNPD,DLAT,RPL13,CYR61,RPL24,TUFM,RPL23A,RPS20,RPS9	N/A	N/A	N/A	N/A	N/A
GO:BP	rRNA metabolic process	GO:0016072	0.00212514	2.67261	275	11	RPS8,RPL34,RPL18A,RPS6,RPL7A,RPL11,RPL13,RPL24,RPL23A,RPS9,RSL1D1	N/A	N/A	N/A	N/A	N/A
GO:BP	cellular catabolic process	GO:0044248	0.00327454	2.48485	2381	34	CHMP4B,RPS8,RPL34,FUS,RPL18A,RPS6,GAPDH,RPL7A,YBX1,IFT20,SAPS3,MOV10,RIPK2,CCDC47,PEX5,PGAM5,RPL11,PDE4C,YBX3,CBS,DDB1,YWHAZ,TPI1,RPS27A,PDE4D,HNRNPD,HSPA8,RPL13,RPL24,RPL23A,RPS20,HSPA1B,RPS9,TRIM21	N/A	N/A	N/A	N/A	N/A
GO:BP	negative regulation of mRNA metabolic process	GO:1903312	0.00381459	2.41855	95	7	FUS,YBX1,SRSF12,YBX3,SRSF6,RBMX,HNRNPD	N/A	N/A	N/A	N/A	N/A
GO:BP	positive regulation of mRNA processing	GO:0050685	0.00430469	2.36606	35	5	RBM3,NUDT21,TRA2B,RBMX,HSPA8	N/A	N/A	N/A	N/A	N/A
GO:BP	macromolecule catabolic process	GO:0009057	0.00622732	2.2057	1479	25	CHMP4B,RPS8,RPL34,FUS,RPL18A,RPS6,RPL7A,YBX1,SAPS3,MOV10,CCDC47,GJA1,RPL11,YBX3,DDB1,YWHAZ,RPS27A,HNRNPD,HSPA8,RPL13,RPL24,RPL23A,RPS20,HSPA1B,RPS9	N/A	N/A	N/A	N/A	N/A
GO:BP	actin-myosin filament sliding	GO:0033275	0.00748454	2.12583	39	5	TPM1,TPM4,TPM3,MYL1,MYL6	0.000143045	3.84453	39	5	TPM1,TPM4,TPM3,MYL1,MYL6
GO:BP	muscle filament sliding	GO:0030049	0.00748454	2.12583	39	5	TPM1,TPM4,TPM3,MYL1,MYL6	0.000143045	3.84453	39	5	TPM1,TPM4,TPM3,MYL1,MYL6
GO:BP	regulation of mRNA splicing, via spliceosome	GO:0048024	0.00846574	2.07233	107	7	RBM3,WTAP,TRA2B,SRSF12,SRSF6,RBMX,HSPA8	N/A	N/A	N/A	N/A	N/A
GO:BP	gene expression	GO:0010467	0.00862976	2.064	6192	62	AIMP1,RPS8,SNRPD1,RBM3,RPL34,PDX1,FUS,RPL18A,RPS6,GAPDH,RPL7A,HNRNPUL1,SF3B2,LMNA,YBX1,CPSF6,NUP205,ZC3H13,WTAP,MOV10,RIPK2,TAX1BP1,NUDT21,AKAP8L,GJA1,RPL11,TRA2B,SNRPN,RPS27L,SRSF12,CGGBP1,YBX3,AIMP2,YWHAZ,SRSF6,TXN,HMGN1,RPS27A,JUP,PPIA,RBMX,HNRNPAB,PDE4D,HNRNPA3,HNRNPD,HSPA8,RPL13,CYR61,ILF2,RPL24,SNRPD3,TUFM,RPL23A,RPS20,HSPA1B,MFAP1,RBM14,RPS9,HNRNPF,RSL1D1,BTF3,TRIM21	N/A	N/A	N/A	N/A	N/A
GO:BP	cellular component assembly	GO:0022607	0.0104424	1.9812	3104	39	CHMP4B,SNRPD1,PDLIM5,FUS,CHMP5,CALD1,LMNA,IFT20,CPSF6,SAPS3,NUP205,PEX5,TJP1,CGNL1,NUDT21,GJA1,RPL11,RPS27L,TUBB,SRSF12,AIMP2,DDB1,YWHAZ,SRSF6,PCM1,DNAH8,MAP4,MYH11,RPS27A,JUP,TPM1,DBN1,RBMX,HSPA8,RPL24,SNRPD3,RPL23A,HSPA1B,RBM14	N/A	N/A	N/A	N/A	N/A
GO:BP	cellular protein localization	GO:0034613	0.0110385	1.95709	1842	28	CHMP4B,RPS8,RPL34,RPL18A,RPS6,RPL7A,LMNA,YBX1,IFT20,CCDC47,PEX5,TBC1D4,GJA1,RPL11,YWHAZ,CCT4,TXN,PCM1,RPS27A,JUP,DBN1,HSPA8,RPL13,RPL24,RPL23A,RPS20,RPS9,SLC25A6	0.0353309	1.45184	1842	16	CHMP4B,RPS8,RPL34,RPL18A,RPS6,RPL7A,LMNA,YBX1,IFT20,YWHAZ,CCT4,TXN,PCM1,RPS27A,JUP,DBN1
GO:BP	organic substance catabolic process	GO:1901575	0.0115929	1.93581	2289	32	CHMP4B,RPS8,RPL34,FUS,RPL18A,RPS6,GAPDH,RPL7A,YBX1,SAPS3,NUP205,MOV10,CCDC47,PEX5,GJA1,RPL11,PDE4C,YBX3,CBS,DDB1,YWHAZ,TPI1,RPS27A,PDE4D,HNRNPD,HSPA8,RPL13,RPL24,RPL23A,RPS20,HSPA1B,RPS9	N/A	N/A	N/A	N/A	N/A
GO:BP	cellular macromolecule localization	GO:0070727	0.012751	1.89445	1856	28	CHMP4B,RPS8,RPL34,RPL18A,RPS6,RPL7A,LMNA,YBX1,IFT20,CCDC47,PEX5,TBC1D4,GJA1,RPL11,YWHAZ,CCT4,TXN,PCM1,RPS27A,JUP,DBN1,HSPA8,RPL13,RPL24,RPL23A,RPS20,RPS9,SLC25A6	0.0388707	1.41038	1856	16	CHMP4B,RPS8,RPL34,RPL18A,RPS6,RPL7A,LMNA,YBX1,IFT20,YWHAZ,CCT4,TXN,PCM1,RPS27A,JUP,DBN1
GO:BP	muscle system process	GO:0003012	0.0134901	1.86998	471	13	PDLIM5,CALD1,LMNA,GJA1,MYH11,DSP,JUP,TPM1,TPM4,TPM3,MYL1,MYL6,PDE4D	8.83155e-05	4.05396	471	11	PDLIM5,CALD1,LMNA,MYH11,DSP,JUP,TPM1,TPM4,TPM3,MYL1,MYL6
GO:BP	catabolic process	GO:0009056	0.0142266	1.8469	2779	36	CHMP4B,RPS8,RPL34,FUS,RPL18A,RPS6,GAPDH,RPL7A,YBX1,IFT20,SAPS3,NUP205,MOV10,RIPK2,CCDC47,PEX5,PGAM5,GJA1,RPL11,PDE4C,YBX3,CBS,DDB1,YWHAZ,TPI1,RPS27A,PDE4D,HNRNPD,HSPA8,RPL13,RPL24,RPL23A,RPS20,HSPA1B,RPS9,TRIM21	N/A	N/A	N/A	N/A	N/A
GO:BP	protein localization to cell-cell junction	GO:0150105	0.0171633	1.7654	22	4	TJP2,TJP1,CGNL1,DSP	N/A	N/A	N/A	N/A	N/A
GO:BP	actin filament-based process	GO:0030029	0.0192552	1.71545	810	17	PDLIM5,CALD1,INF2,TJP1,CGNL1,GJA1,MYH11,DSP,JUP,TPM1,TPM4,TPM3,DBN1,MYL1,MYL6,PDE4D,CFL1	0.0185212	1.73233	810	11	PDLIM5,CALD1,MYH11,DSP,JUP,TPM1,TPM4,TPM3,DBN1,MYL1,MYL6
GO:BP	positive regulation of mRNA splicing, via spliceosome	GO:0048026	0.0292556	1.53379	25	4	RBM3,TRA2B,RBMX,HSPA8	N/A	N/A	N/A	N/A	N/A
GO:BP	muscle contraction	GO:0006936	0.0299819	1.52314	363	11	CALD1,GJA1,MYH11,DSP,JUP,TPM1,TPM4,TPM3,MYL1,MYL6,PDE4D	0.00108232	2.96564	363	9	CALD1,MYH11,DSP,JUP,TPM1,TPM4,TPM3,MYL1,MYL6
